# Supplementary material for: Synthesis of axially chiral diaryl ethers via NHC-catalyzed atroposelective esterification
Source: Royal Society of Chemistry journal article supplement (doi:10.1039/d3sc06444a), 2024-01-01

## Supporting Information

### **Synthesis of Axially Chiral Diaryl Ethers by NHCs-Catalyzed Atroposelective Esterification**

Yingtao Wu,<sup>[1]</sup> Xin Guan,<sup>[1]</sup> Huaqiu Zhao,<sup>[1]</sup> Mingrui Li,<sup>[1]</sup> Tianlong Liang,<sup>[1]</sup> Jiaqiong Sun,<sup>[2]</sup>  
Guangfan Zheng\*,<sup>[1]</sup> and Qian Zhang\*,<sup>[1,3]</sup>

<sup>[1]</sup>Jilin Province Key Laboratory of Organic Functional Molecular Design & Synthesis, Department of Chemistry, Northeast Normal University, Changchun 130024, China

<sup>[2]</sup>School of Environment, Northeast Normal University, Changchun 130117, China

<sup>[3]</sup>State Key Laboratory of Organometallic Chemistry, Shanghai Institute of Organic Chemistry, Chinese Academy of Sciences 345 Lingling Lu, Shanghai 200032, China

\*Correspondence to: zhenggf265@nenu.edu.cn; zhangq651@nenu.edu.cn

## Table of Contents

|                                                                                                                          |            |
|--------------------------------------------------------------------------------------------------------------------------|------------|
| <b>I. General Information</b>                                                                                            | <b>S1</b>  |
| <b>II. Experimental Section</b>                                                                                          | <b>S2</b>  |
| <b>III. Synthetic Applications</b>                                                                                       | <b>S52</b> |
| <b>IV. Mechanistic Studies</b>                                                                                           | <b>S62</b> |
| <b>V. Determining the Absolute Configuration of 3aa</b>                                                                  | <b>S76</b> |
| <b>VI. References</b>                                                                                                    | <b>S81</b> |
| <b>VII. <math>^1\text{H}</math>, <math>^{13}\text{C}</math>, <math>^{19}\text{F}</math> NMR Spectra of New Compounds</b> | <b>S82</b> |

## I. General Information.

All reactions were performed under nitrogen atmosphere in flame dried flasks. All reactions were monitored by thin layer chromatography (TLC) using Macherey-Nagel 0.20 mm silica gel 60 plates. Flash column chromatography was performed on silica gel 60 (particle size 300-400 mesh ASTM, purchased from Taizhou, China).  $^1\text{H}$ ,  $^{13}\text{C}$ ,  $^{19}\text{F}$  spectra were recorded with Varian 500 MHz (Inova-500) or Bruker 600 MHz (Avance-600) instrument. Chemical shifts were referenced to  $\delta_{\text{TMS}} = 0.00$  ppm ( $^1\text{H}$ ,  $^{13}\text{C}$ ). Chemical shifts ( $\delta$ ) are reported in ppm. Coupling constants ( $J$ ) are reported in Hz. Dichloromethane- $d_2$  ( $\delta$  ( $^1\text{H}$ ) = 5.32 ppm,  $\delta$  ( $^{13}\text{C}$ ) = 53.8 ppm), chloroform- $d_1$  ( $\delta$  ( $^1\text{H}$ ) = 7.26 ppm,  $\delta$  ( $^{13}\text{C}$ ) = 77.0 ppm) or methanol- $d_4$  ( $\delta$  ( $^1\text{H}$ ) = 3.31 ppm,  $\delta$  ( $^{13}\text{C}$ ) = 49.0 ppm) were used as solvents. The following abbreviations are used to describe peak patterns as appropriate: s = singlet, d = doublet, t = triplet, q = quartet, m = multiplet, dd = doublet of doublet, dt = triplet of doublet, td = doublet of triplet, bs = broad singlet. High-pressure liquid chromatography (HPLC) was performed on Agilent 1200 Series chromatographs using a chiral column (25 cm) as noted for each compound. High-resolution mass spectra HRMS (ESI-TOF) were recorded on Bruker microtof. Compounds were visualized by irradiation with UV light, or stained with iodine/silica gel, or potassium permanganate. Preparatory thin-layer chromatography (Prep-TLC) was performed on silica gel GF with UV 254 (20  $\times$  20 cm, 1000 microns, from Yantai Jiang you Silica Gel Development Co., Ltd.) and visualized with UV light. Optical rotations were reported as follows:  $[\alpha]_{\text{D}}^{\text{T}} = (c: \text{g}/100 \text{ mL in } \text{CH}_2\text{Cl}_2)$ .

## II. Experimental Section

### 2.1 Synthesis of Starting Materials

#### 2.1.1 List of starting materials

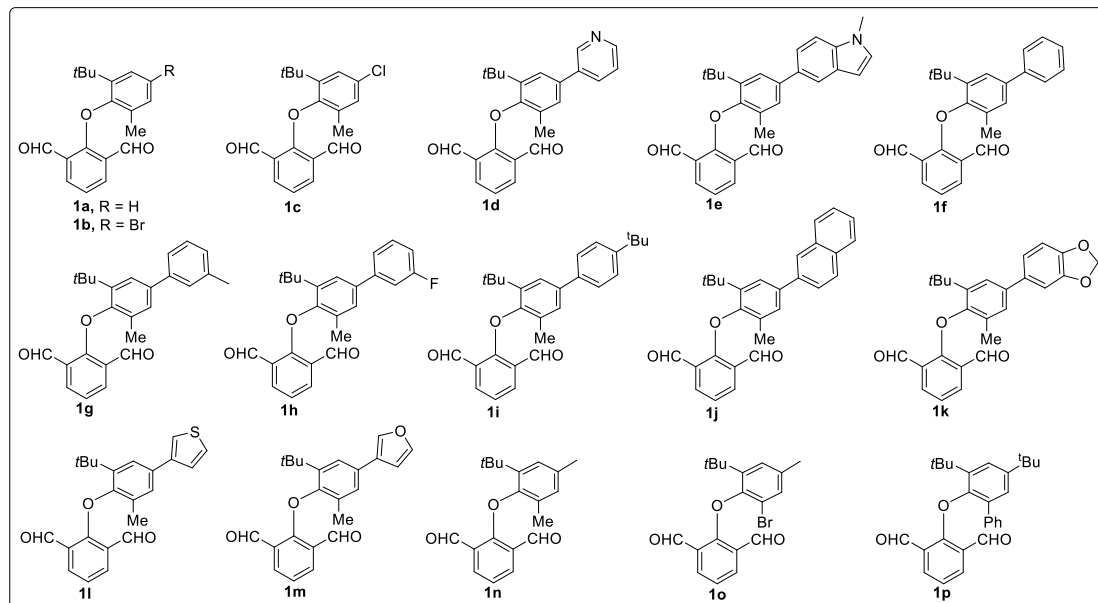

#### 2.1.2 General procedure for the synthesis of Substrates 1a-1p.<sup>[1,2]</sup> Preparation of 1a is shown as a representative example.

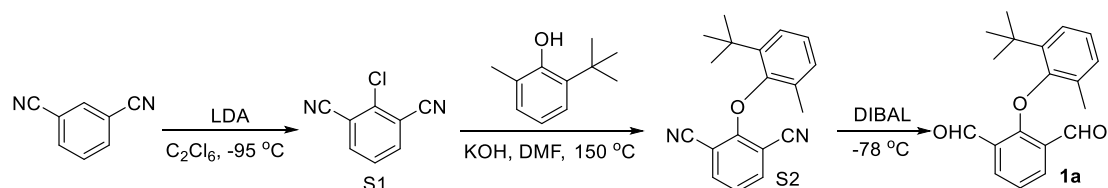

n-BuLi (2.5 M in Hexanes) (20 mL, 50 mmol) was added dropwise to a stirred solution of anhydrous diisopropylamine (7.0 mL, 50 mmol) dissolved in anhydrous THF (50 mL) in 500 mL double neck flask at 0 °C under N<sub>2</sub> and allowed to stir for 30 min at this temperature. A solution of 1,3-dicyanobenzene (5 g, 39.02 mmol, 1 equiv) in anhydrous THF (75 mL) was added dropwise to double neck flask at -95 °C and allowed to stir for 1 h. Hexachloroethane (14.8 g, 62.44 mmol, 1.6 equiv) dissolved in anhydrous THF (100 mL) was added to the reaction mixture at this temperature and the mixture allowed to stir for 1 h and slowly rise to room temperature continue to react overnight. The mixture was quenched by addition of saturated ammonium chloride solution and THF removed under reduced pressure and extract 3 times with EA. The organic phase were washed with brine, dried with anhydrous sodium sulfate and solvent removed under reduced pressure. The product was purified by flash column chromatography (10:1 = PE : EA) to yield the product **S1** as a yellow solid.

Phenol (8.46 mmol, 1 equiv), KOH (0.48 g, 8.46 mmol, 1 equiv) were stirred in toluene (25 mL) at 130 °C in eggplant bottle with water separator installed for 2-4 h. Toluene was removed under reduced pressure, **S1** (1.25 g, 7.69 mmol, 1 equiv) and anhydrous DMF (50 mL) were stirred under N<sub>2</sub> at 150 °C for 16 h. Solvent were removed under reduced pressure, and the residue was dissolved in portions of EA for 3 times and the combined organics washed with water for 3 times, dried for Na<sub>2</sub>SO<sub>4</sub>, and solvent removed under reduced pressure. The product was purified by flash column chromatography (10:3 = PE : EA) to yield the product **S2** as a brown oil.

DIBAL (1.5M solution in toluene) (2.5 equiv) was added slowly to a solution of **S2** (1 equiv) in

anhydrous toluene (30 mL) under N<sub>2</sub> at -78 °C and allowed to stir for 1 h at this temperature. After stirred 16 h at RT, cooled to 0 °C, 5M HCl was added slowly to the mixture and allowed to stir for 2 h. The aqueous phase was extracted 3 times with EA and the combined organics washed with brine. The organics dried for Na<sub>2</sub>SO<sub>4</sub>, and solvent removed under reduced pressure. The product was purified by flash column chromatography (50:1 = PE : EA) to yield the product **1a** as a yellow oil (placed in the air for a period of time, it can turn into a yellow solid).

### 2.1.3 Characterization data of the new substrates

#### 2-(2-(tert-butyl)-6-methyl-4-(pyridin-3-yl)phenoxy)isophthalaldehyde (**1d**)

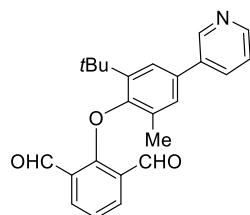

**1d**: light red solid; <sup>1</sup>H NMR (600 MHz, Chloroform-*d*) δ 10.10 (s, 2H), 8.85 (s, 1H), 8.62 (s, 1H), 8.13 (d, *J* = 7.6 Hz, 2H), 7.87 (dt, *J* = 7.9, 1.9 Hz, 1H), 7.55 (d, *J* = 2.3 Hz, 1H), 7.39 (dd, *J* = 7.9, 4.8 Hz, 1H), 7.31 – 7.27 (m, 2H), 2.00 (s, 3H), 1.52 (s, 9H). <sup>13</sup>C NMR (150 MHz, Chloroform-*d*) δ 187.64, 160.79, 155.94, 148.57, 148.17, 141.53, 135.42, 135.36, 134.42, 130.00, 128.30, 127.12, 125.39, 123.60, 123.03, 35.55, 30.29, 18.15. HRMS (ESI-TOF) (*m/z*): Calcd for C<sub>24</sub>H<sub>23</sub>NaNO<sub>3</sub>, ([M + Na]<sup>+</sup>), 396.1570; found 396.1540.

#### 2-(2-(tert-butyl)-6-methyl-4-(1-methyl-1H-indol-5-yl)phenoxy)isophthalaldehyde (**1e**)

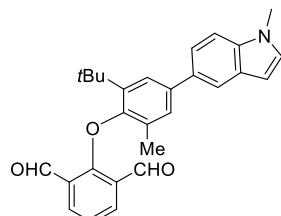

**1e**: light red solid; <sup>1</sup>H NMR (500 MHz, Chloroform-*d*) δ 10.10 (s, 2H), 8.11 (d, *J* = 7.7 Hz, 2H), 7.81 (d, *J* = 1.6 Hz, 1H), 7.62 (d, *J* = 2.3 Hz, 1H), 7.46 – 7.36 (m, 2H), 7.33 (d, *J* = 2.2 Hz, 1H), 7.27 – 7.20 (m, 1H), 7.09 (d, *J* = 3.0 Hz, 1H), 6.54 (d, *J* = 3.0 Hz, 1H), 3.83 (s, 3H), 2.00 (s, 3H), 1.52 (s, 9H). <sup>13</sup>C NMR (150 MHz, Chloroform-*d*) δ 188.02, 161.24, 154.54, 140.72, 140.31, 136.32, 135.33, 131.94, 130.04, 129.65, 128.95, 127.61, 127.17, 125.55, 122.59, 121.28, 119.44, 109.48, 101.35, 35.45, 32.99, 30.45, 18.07. HRMS (ESI-TOF) (*m/z*): Calcd for C<sub>25</sub>H<sub>21</sub>NaNO<sub>3</sub>, ([M + Na]<sup>+</sup>), 448.1883; found 448.1886.

#### 2-((3-(tert-butyl)-3'-fluoro-5-methyl-[1,1'-biphenyl]-4-yl)oxy)isophthalaldehyde (**1h**)

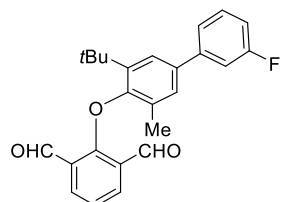

**1h**: light yellow solid; <sup>1</sup>H NMR (500 MHz, Chloroform-*d*) δ 10.09 (s, 2H), 8.12 (d, *J* = 7.7 Hz, 2H), 7.55 (d, *J* = 2.3 Hz, 1H), 7.43 – 7.37 (m, 1H), 7.35 (dt, *J* = 7.8, 1.3 Hz, 1H), 7.30 – 7.24 (m, 3H), 7.07 –

7.02 (m, 1H), 1.99 (s, 3H), 1.51 (s, 9H).  $^{13}\text{C}$  NMR (150 MHz, Chloroform-*d*)  $\delta$  187.70, 163.96, 162.33, 160.88, 155.68, 142.58 (d,  $J = 7.8$  Hz), 141.21, 137.47 (d,  $J = 2.0$  Hz), 135.39, 130.30 (d,  $J = 8.2$  Hz), 129.94, 128.01, 127.13, 125.31, 122.92, 122.76 (d,  $J = 2.8$  Hz), 114.14 (dd,  $J = 36.6, 21.6$  Hz), 35.50, 30.33, 18.10.  $^{19}\text{F}$  NMR (565 MHz, Chloroform-*d*)  $\delta$  -110.15 – -115.05 (m, 1F).

HRMS (ESI-TOF) ( $m/z$ ): Calcd for  $\text{C}_{25}\text{H}_{23}\text{FNaO}_3$ , ( $[\text{M} + \text{Na}]^+$ ), 413.1523; found 413.1553.

**2-(2-(tert-butyl)-6-methyl-4-(thiophen-3-yl)phenoxy)isophthalaldehyde (1l)**

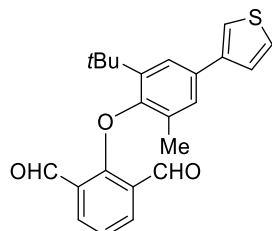

**1l**: yellow solid;  $^1\text{H}$  NMR (600 MHz, Chloroform-*d*)  $\delta$  10.07 (s, 2H), 8.11 (d,  $J = 7.6$  Hz, 2H), 7.57 (d,  $J = 2.3$  Hz, 1H), 7.43 (dd,  $J = 2.9, 1.4$  Hz, 1H), 7.41 (dd,  $J = 4.9, 3.0$  Hz, 1H), 7.36 (dd,  $J = 5.0, 1.4$  Hz, 1H), 7.29 (d,  $J = 1.5$  Hz, 1H), 7.26 (t,  $J = 7.7$  Hz, 1H), 1.97 (s, 3H), 1.50 (s, 9H).  $^{13}\text{C}$  NMR (150 MHz, Chloroform-*d*)  $\delta$  187.83, 161.00, 154.96, 141.47, 141.08, 135.36, 133.54, 129.22, 127.91, 127.11, 126.45, 126.31, 124.66, 122.76, 120.54, 35.40, 30.32, 18.01. HRMS (ESI-TOF) ( $m/z$ ): Calcd for  $\text{C}_{23}\text{H}_{22}\text{SNaO}_3$ , ( $[\text{M} + \text{Na}]^+$ ), 401.1182; found 401.1185.

**2-(2-(tert-butyl)-4-(furan-3-yl)-6-methylphenoxy)isophthalaldehyde (1m)**

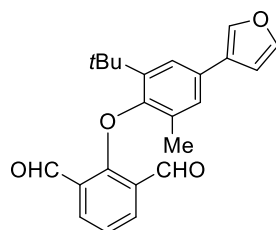

**1m**: yellow solid;  $^1\text{H}$  NMR (500 MHz, Chloroform-*d*)  $\delta$  10.06 (s, 2H), 8.09 (d,  $J = 7.7$  Hz, 2H), 7.70 (t,  $J = 1.2$  Hz, 1H), 7.48 (t,  $J = 1.7$  Hz, 1H), 7.44 (d,  $J = 2.2$  Hz, 1H), 7.25 (d,  $J = 5.2$  Hz, 1H), 7.17 (d,  $J = 2.2$  Hz, 1H), 6.66 (d,  $J = 0.9$  Hz, 1H), 1.94 (s, 3H), 1.48 (s, 9H).  $^{13}\text{C}$  NMR (150 MHz, Chloroform-*d*)  $\delta$  187.83, 161.00, 154.78, 143.80, 141.15, 138.59, 135.35, 130.14, 128.64, 127.98, 127.10, 125.75, 124.03, 122.75, 108.86, 35.35, 30.29, 17.93. HRMS (ESI-TOF) ( $m/z$ ): Calcd for  $\text{C}_{23}\text{H}_{22}\text{NaO}_4$ , ( $[\text{M} + \text{Na}]^+$ ), 385.1410; found 385.1421.

**2-(2-bromo-6-(tert-butyl)-4-methylphenoxy)isophthalaldehyde (1o)**

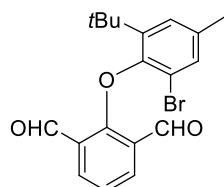

**1o**: yellow solid;  $^1\text{H}$  NMR (600 MHz, Chloroform-*d*)  $\delta$  10.00 (s, 2H), 8.11 (d,  $J = 7.6$  Hz, 2H), 7.29 – 7.24 (m, 2H), 7.24 – 7.23 (m, 1H), 2.35 (s, 3H), 1.44 (s, 9H).  $^{13}\text{C}$  NMR (150 MHz, Chloroform-*d*)  $\delta$  187.84, 160.46, 151.58, 142.70, 136.95, 135.09, 133.47, 128.63, 127.46, 123.05, 113.81, 35.70, 30.15, 20.94. HRMS (ESI-TOF) ( $m/z$ ): Calcd for  $\text{C}_{19}\text{H}_{19}\text{BrNaO}_2$ , ( $[\text{M} + \text{Na}]^+$ ), 397.0410; found 397.0398.

**2-((3,5-di-tert-butyl-[1,1'-biphenyl]-2-yl)oxy)isophthalaldehyde (1p)**

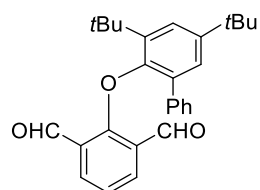

**1p:** yellow solid; **<sup>1</sup>H NMR (500 MHz, Chloroform-*d*)**  $\delta$  9.89 (s, 2H), 7.73 (d,  $J$  = 7.7 Hz, 2H), 7.53 (d,  $J$  = 2.4 Hz, 1H), 7.14 (d,  $J$  = 2.4 Hz, 1H), 7.08 – 6.99 (m, 5H), 6.90 (t,  $J$  = 7.6 Hz, 1H), 1.54 (s, 9H), 1.35 (s, 9H). **<sup>13</sup>C NMR (150 MHz, Chloroform-*d*)**  $\delta$  187.90, 160.83, 153.44, 148.51, 139.90, 138.05, 134.38, 131.88, 129.36, 128.18, 127.93, 127.36, 127.13, 124.72, 122.35, 35.67, 34.84, 31.51, 30.37. **HRMS** (ESI-TOF) ( $m/z$ ): Calcd for C<sub>28</sub>H<sub>30</sub>NaO<sub>3</sub>, ([M + Na]<sup>+</sup>), 437.2087; found 437.2091.

## 2.2 General Synthetic Procedure of 3.

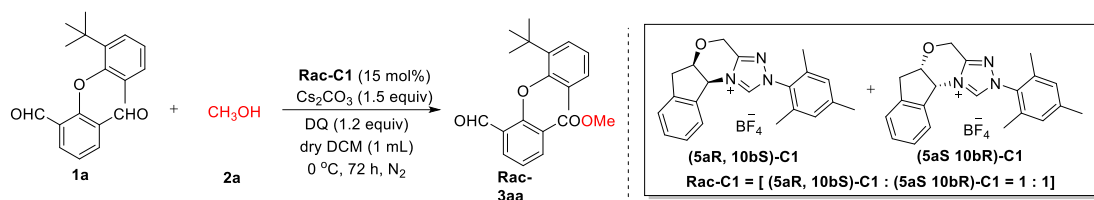

### Racemic Synthesis:

Preparation of **Rac-C1**: **(5aR, 10bS)-C1** (100 mg) and **(5aS, 10bR)-C1** (100 mg) are completely dissolved in dry DCM and concentrated to remove DCM.

**Representative Synthesis of Product (Rac)-3aa.** In a nitrogen-filled glovebox, a flame-dried screw-cap reaction tube equipped with a Teflon-coated magnetic stir bar was charged with **Rac-C1** (15 mol%, 6.27 mg),  $\text{Cs}_2\text{CO}_3$  (49.0 mg, 1.5 equiv), 2-(2-(tert-butyl)-6-methylphenoxy)isophthalaldehyde **1a** (0.1 mmol, 29.6 mg), and anhydrous dichloromethane (1.0 mL). The mixture was stirred for 5 minutes, followed by the addition of  $\text{CH}_3\text{OH}$  **2a** (0.02 ml, 5.0 equiv) and 3,3',5,5'-tetra-*tert*-butyldiphenylquinone (48 mg, 1.2 equiv). Then the tube was sealed with a Thermo Scientific PTFE screw cap equipped with a septum, removed from the glovebox. The reaction mixture was stirred at  $0\text{ }^\circ\text{C}$  for 72 h. After the reaction was completed as indicated by TLC analysis, the solvent was removed under reduced pressure and the residue was purified by silica gel chromatography using petroleum ether/ethyl acetate 10:1 (v/v) to give the racemic product **3aa**.

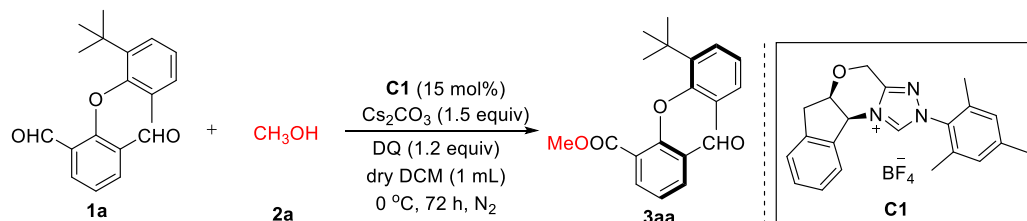

### Asymmetric Synthesis:

**Representative Synthesis of Product 3aa** (standard conditions A): In a nitrogen-filled glovebox, a flame-dried screw-cap reaction tube equipped with a Teflon-coated magnetic stir bar was charged with **C1** (15 mol%, 6.27 mg),  $\text{Cs}_2\text{CO}_3$  (49.0 mg, 1.5 equiv), 2-(2-(tert-butyl)-6-methylphenoxy)isophthalaldehyde **1a** (0.1 mmol, 29.6 mg), and anhydrous dichloromethane (1.0 mL). The mixture was stirred for 5 minutes, followed by the addition of  $\text{CH}_3\text{OH}$  **2a** (0.02 ml, 5.0 equiv) and 3,3',5,5'-tetra-*tert*-butyldiphenylquinone (48 mg, 1.2 equiv). Then the tube was sealed with a Thermo Scientific PTFE screw cap equipped with a septum, removed from the glovebox. The reaction mixture was stirred at  $0\text{ }^\circ\text{C}$  for 72 h. After the reaction was completed as indicated by TLC analysis, the solvent was removed under reduced pressure and the residue was purified by silica gel chromatography using petroleum ether/ethyl acetate 10:1 (v/v) to give the product (S)-**3aa**.

## Substrate with unsatisfactory results

We have employed other nucleophiles (Nu) such as propan-2-ol, diphenylmethanol, tert-Butanol, 4-methylbenzenethiol, 1-phenylthiourea, pyridin-2-amine, benzothioamide, ethanethioamide or 4-methylbenzenesulfonamide under our optimized, or slightly modified reaction conditions, and the results were summarized in Scheme S1.

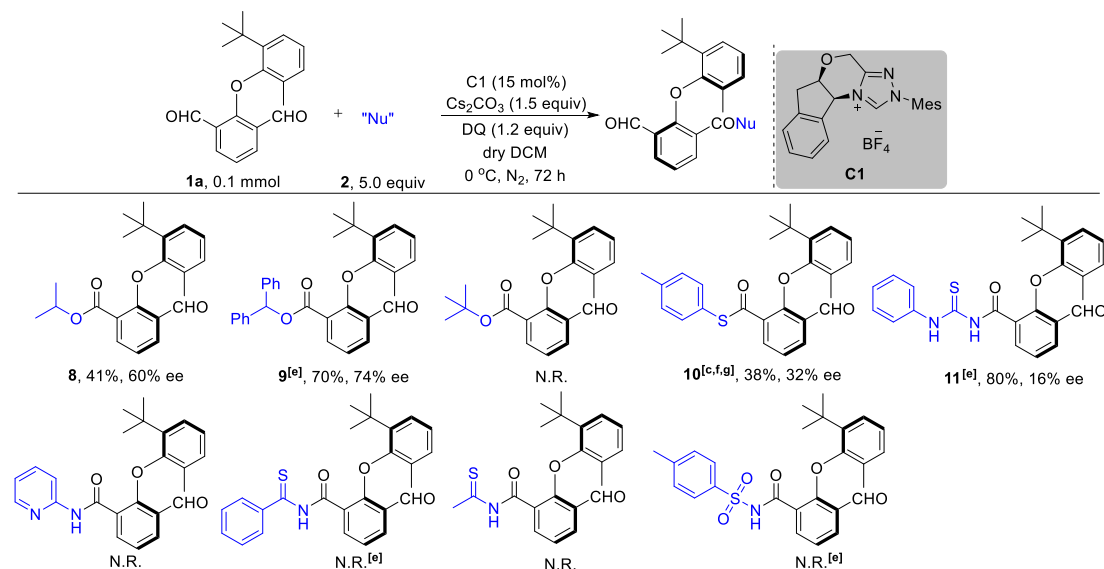

**Scheme S1.** Substrate scope for desymmetrizing functionalization of axially pre-chiral dialdehydes.<sup>a,b</sup>

<sup>a</sup>Unless otherwise noted, all the reactions were carried out with **1** (0.1 mmol), **2** (0.5 mmol), **C1** (15 mol%), **DQ** (1.2 equiv), **Cs<sub>2</sub>CO<sub>3</sub>** (1.5 equiv), and dry **DCM** (1.0 mL) at 0 °C under N<sub>2</sub> atmosphere for 72 h. <sup>b</sup>Isolated yield, *ee* was determined by chiral-phase HPLC analysis. <sup>c</sup>THF was used instead of DCM. <sup>d</sup>PhMe was used instead of DCM. <sup>e</sup>Reactions were carried out with **2** (0.3 mmol). <sup>f</sup>Reactions were performed at 30 °C. <sup>g</sup>**C7** was used instead of **C1**.

## (*S*)-isopropyl 2-(2-(tert-butyl)-6-methylphenoxy)-3-formylbenzoate (**8**)

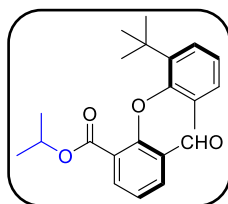

The title compound **8** was prepared under the optimized conditions and purified by preparative TLC (hexane : Et<sub>2</sub>O = 5:1). **8** was obtained as a yellow oil (14.5 mg, 41%). **<sup>1</sup>H NMR (500 MHz, Chloroform-*d*)** δ 9.61 (s, 1H), 7.91 (dd, *J* = 7.8, 1.9 Hz, 1H), 7.82 (dd, *J* = 7.5, 1.9 Hz, 1H), 7.29 (dd, *J* = 7.8, 1.7 Hz, 1H), 7.15 (t, *J* = 7.6 Hz, 1H), 7.06 (t, *J* = 7.6 Hz, 1H), 7.00 (dd, *J* = 7.6, 1.7 Hz, 1H), 5.13 – 5.06 (m, 1H), 1.93 (s, 3H), 1.44 (s, 9H), 1.29 (d, *J* = 6.3 Hz, 3H), 1.27 (d, *J* = 6.3 Hz, 3H). **<sup>13</sup>C NMR (125 MHz, Chloroform-*d*)** δ 188.07, 165.66, 157.27, 155.42, 140.75, 136.38, 132.11, 130.99, 127.60, 126.87, 125.94, 125.11, 124.98, 122.00, 69.27, 35.28, 30.34, 21.84, 21.75, 17.53.

**HRMS (ESI-TOF) (m/z):** Calcd for C<sub>22</sub>H<sub>26</sub>NaO<sub>4</sub>, ([M + Na]<sup>+</sup>), 377.1723; found 377.1725.

[α]<sub>D</sub><sup>20</sup> = -24.6 (c = 0.72, CH<sub>2</sub>Cl<sub>2</sub>).

**HPLC analysis:** Daicel Chiralpak IG column (99.5:0.5 hexane: 2-propanol, 1.0 mL/min, 25 °C, 254 nm); t<sub>R</sub> (major) = 7.95 min, t<sub>R</sub> (minor) = 9.93 min, 60% ee.

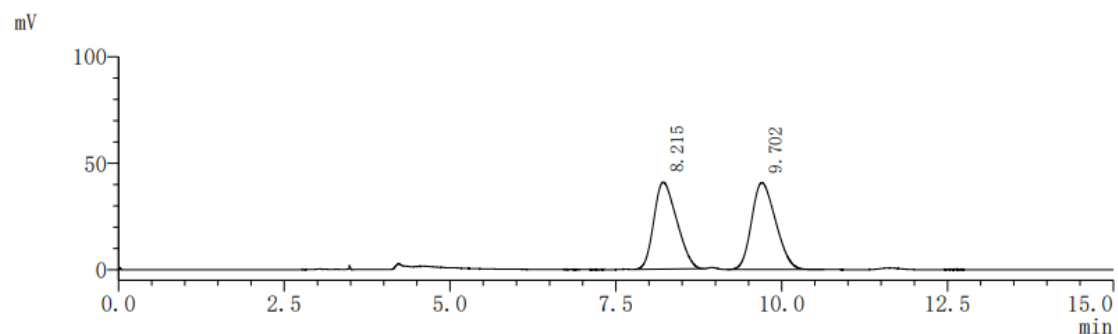

| Peak | PetTime | Type | Width(min) | Area    | Hight | Area%   |
|------|---------|------|------------|---------|-------|---------|
| 1    | 8.215   | M    | 0.6644     | 980634  | 40860 | 48.8487 |
| 2    | 9.702   | M    | 0.6821     | 1026857 | 40786 | 51.1513 |

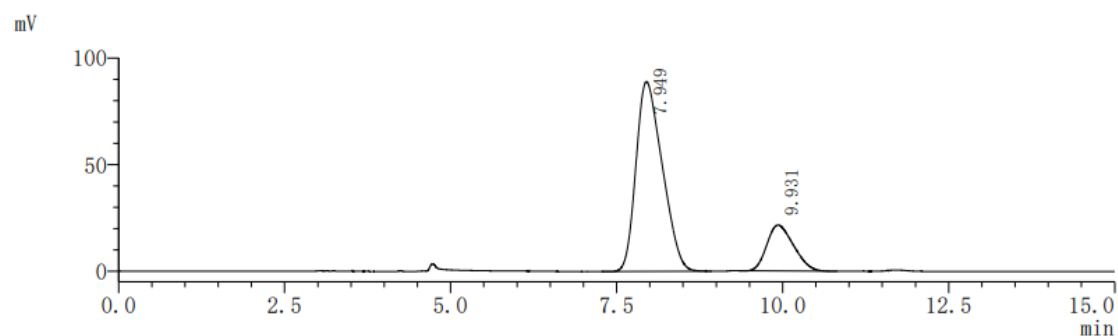

| Peak | PetTime | Type | Width(min) | Area    | Hight | Area%   |
|------|---------|------|------------|---------|-------|---------|
| 1    | 7.949   | M    | 0.7688     | 2453513 | 89078 | 80.2127 |
| 2    | 9.931   | M    | 0.7670     | 605247  | 21555 | 19.7873 |

**(S)-benzhydryl 2-(2-(tert-butyl)-6-methylphenoxy)-3-formylbenzoate (9)**

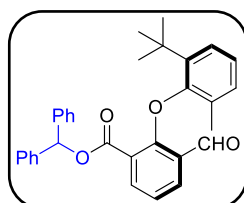

The title compound **9** was prepared under the optimized conditions and purified by preparative TLC (hexane : Et<sub>2</sub>O = 5:1). **9** was obtained as a transparent oil (33.4 mg, 70%). **<sup>1</sup>H NMR (500 MHz, Chloroform-*d*)** δ 9.59 (s, 1H), 7.94 (dd, *J* = 7.8, 1.9 Hz, 1H), 7.90 (dd, *J* = 7.6, 1.9 Hz, 1H), 7.34 – 7.24 (m, 12H), 7.16 (t, *J* = 7.7 Hz, 1H), 7.02 (t, *J* = 7.7 Hz, 1H), 6.98 (s, 1H), 6.85 (dd, *J* = 7.6, 1.6 Hz, 1H), 1.90 (s, 3H), 1.32 (s, 9H). **<sup>13</sup>C NMR (125 MHz, Chloroform-*d*)** δ 187.94, 164.71, 157.62, 155.32, 140.68, 140.00, 139.70, 136.62, 132.63, 131.01, 128.56, 128.44, 128.03, 127.96, 127.46, 127.22, 127.00, 126.01, 125.20, 123.99, 122.02, 78.09, 35.21, 30.27, 17.64.

**HRMS (ESI-TOF)** (*m/z*): Calcd for C<sub>32</sub>H<sub>30</sub>NaO<sub>4</sub>, ([M + Na]<sup>+</sup>), 501.2036; found 501.2033.

[α]<sub>D</sub><sup>20</sup> = -41.6 (*c* = 1.67, CH<sub>2</sub>Cl<sub>2</sub>).

**HPLC analysis:** Daicel Chiralpak AD-3 column (98:1 hexane: 2-propanol, 1.0 mL/min, 25 °C, 254 nm); *t*<sub>R</sub> (major) = 7.95 min, *t*<sub>R</sub> (minor) = 9.93 min, 60% ee.

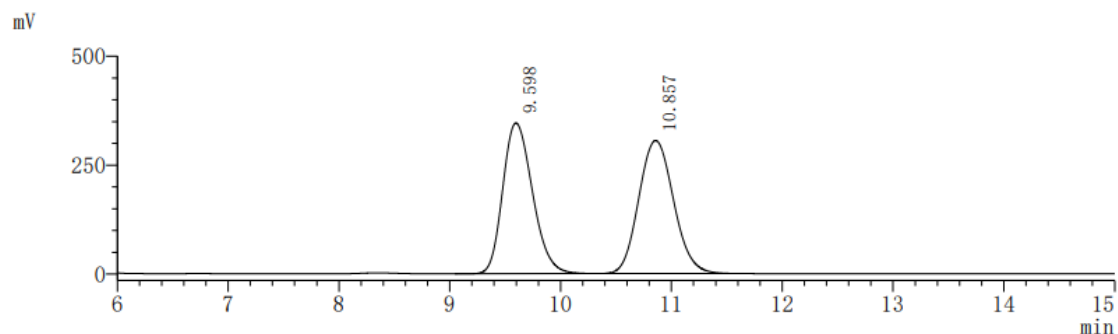

| Peak | PetTime | Type | Width(min) | Area    | Hight  | Area%   |
|------|---------|------|------------|---------|--------|---------|
| 1    | 9.598   | M    | 0.4867     | 6427124 | 345462 | 49.0707 |
| 2    | 10.857  | M    | 0.5715     | 6670556 | 305330 | 50.9293 |

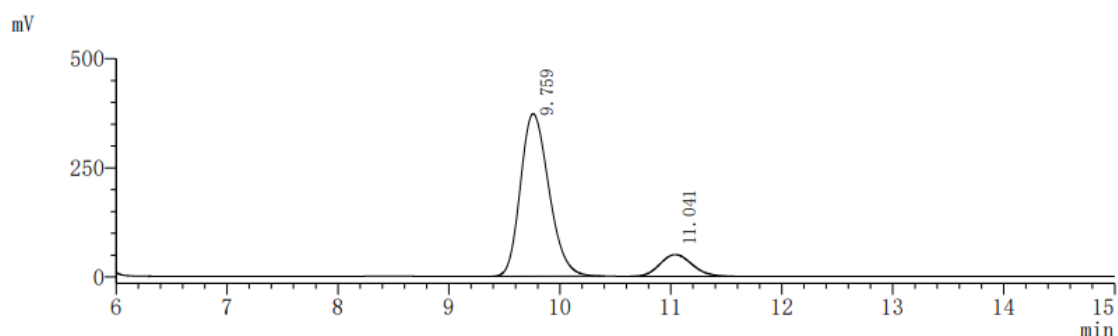

| Peak | PetTime | Type | Width(min) | Area    | Hight  | Area%   |
|------|---------|------|------------|---------|--------|---------|
| 1    | 9.759   | M    | 0.4677     | 6650473 | 372170 | 86.9716 |
| 2    | 11.041  | M    | 0.5291     | 996242  | 49616  | 13.0284 |

**(S)-(p-tolyl)-2-(2-(tert-butyl)-6-methylphenoxy)-3-formylbenzothioate (10)**

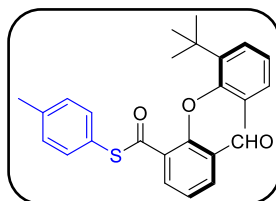

The title compound **10** was prepared under the optimized conditions and purified by preparative TLC (hexane : DCM = 1:1). **10** was obtained as a transparent oil (15.9 mg, 38%). **<sup>1</sup>H NMR (500 MHz, Chloroform-*d*)**  $\delta$  9.48 (s, 1H), 7.95 – 7.92 (m, 2H), 7.32 – 7.30 (m, 3H), 7.24 (t, *J* = 7.1 Hz, 2H), 7.20 (t, *J* = 7.7 Hz, 1H), 7.09 (t, *J* = 7.7 Hz, 1H), 7.04 (dd, *J* = 7.5, 1.6 Hz, 1H), 2.38 (s, 3H), 2.00 (s, 3H), 1.46 (s, 9H). **<sup>13</sup>C NMR (150 MHz, Chloroform-*d*)**  $\delta$  189.74, 187.68, 156.48, 155.38, 140.94, 140.00, 135.05, 134.63, 132.84, 131.25, 130.26, 130.13, 127.90, 126.89, 126.14, 125.54, 124.10, 122.17, 35.33, 30.49, 21.40, 17.78.

**HRMS (ESI-TOF)** (*m/z*): Calcd for C<sub>26</sub>H<sub>26</sub>NaO<sub>3</sub>S, ([M + Na]<sup>+</sup>), 441.1495; found 441.1493.

**HPLC analysis:** Daicel Chiralpak AD-3 column (99:1 hexane: 2-propanol, 1.0 mL/min, 25 °C, 254 nm); *t<sub>R</sub>* (major) = 10.79 min, *t<sub>R</sub>* (minor) = 12.50 min, 32% ee.

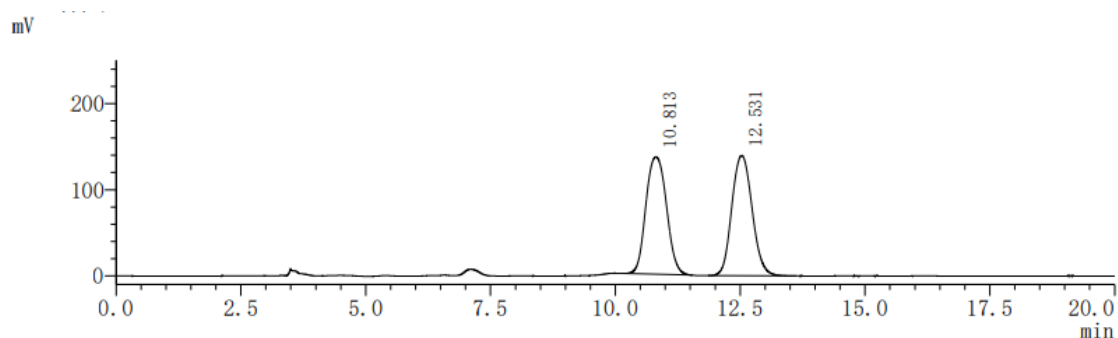

| Peak | PetTime | Type | Width(min) | Area    | Hight  | Area%   |
|------|---------|------|------------|---------|--------|---------|
| 1    | 10.813  | M    | 0.7269     | 3909752 | 136187 | 49.7166 |
| 2    | 12.531  | M    | 0.7297     | 3954318 | 139548 | 50.2834 |

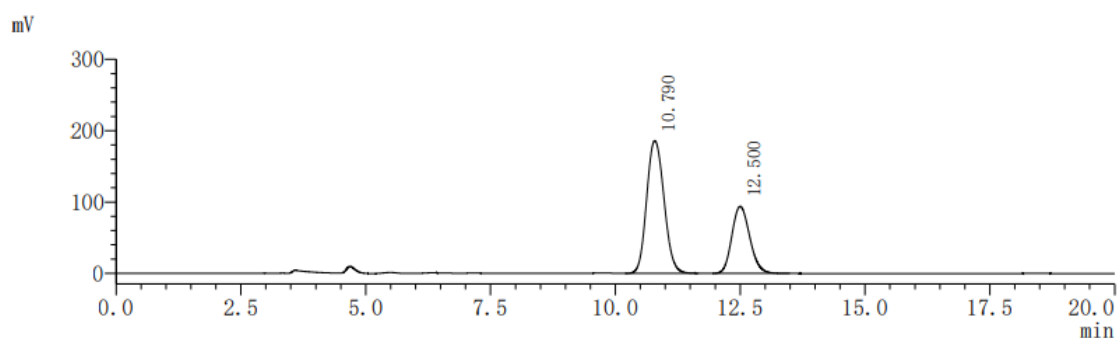

| Peak | PetTime | Type | Width(min) | Area    | Hight  | Area%   |
|------|---------|------|------------|---------|--------|---------|
| 1    | 10.790  | M    | 0.6305     | 4496346 | 185974 | 65.7702 |
| 2    | 12.500  | M    | 0.6506     | 2340098 | 93877  | 34.2298 |

**(S)-2-(2-(tert-butyl)-6-methylphenoxy)-3-formyl-N-(phenylcarbamothioyl)benzamide (11)**

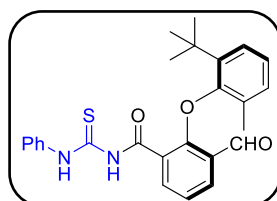

The title compound **11** was prepared under the optimized conditions and purified by preparative TLC (hexane : EA = 10:3). **11** was obtained as a yellow oil (35.7 mg, 80%). <sup>1</sup>H NMR (500 MHz, Chloroform-*d*) δ 12.47 (s, 1H), 10.26 (s, 1H), 9.37 (d, *J* = 0.8 Hz, 1H), 8.31 (dd, *J* = 7.7, 2.0 Hz, 1H), 7.99 (dd, *J* = 7.7, 2.0 Hz, 1H), 7.71 – 7.69 (m, 2H), 7.43 – 7.40 (m, 2H), 7.38 (dd, *J* = 7.9, 1.6 Hz, 1H), 7.32 – 7.26 (m, 2H), 7.17 (t, *J* = 7.7 Hz, 1H), 7.09 (dd, *J* = 7.5, 1.0 Hz, 1H), 1.99 (s, 3H), 1.50 (s, 9H). <sup>13</sup>C NMR (150 MHz, Chloroform-*d*) δ 187.17, 177.89, 164.60, 157.15, 154.63, 141.42, 137.67, 137.63, 135.30, 131.36, 128.91, 128.33, 127.38, 126.87, 126.85, 126.79, 124.05, 123.16, 122.53, 35.42, 30.94, 17.58.

**HRMS** (ESI-TOF) (*m/z*): Calcd for C<sub>26</sub>H<sub>26</sub>N<sub>2</sub>NaO<sub>3</sub>S, ([M + Na]<sup>+</sup>), 469.1556; found 469.1556.

**HPLC analysis:** Daicel Chiralpak AD-3 column (95:5 hexane: 2-propanol, 1.0 mL/min, 25 °C, 254 nm); *t<sub>R</sub>* (minor) = 17.99 min, *t<sub>R</sub>* (major) = 28.41 min, 16% ee.

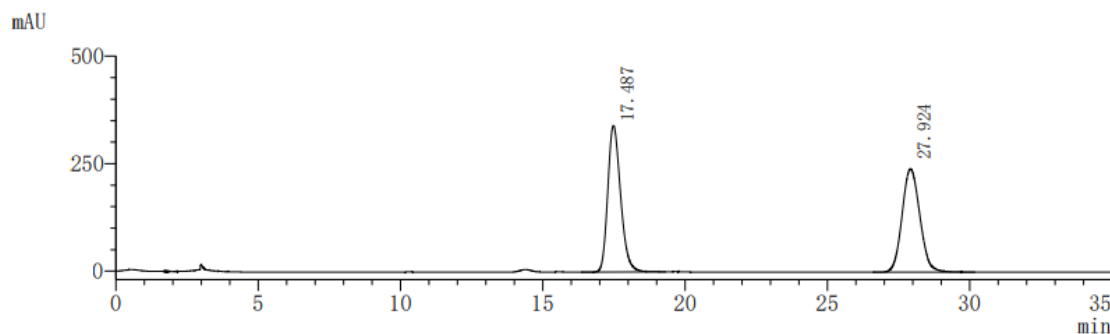

| Peak | PetTime | Type | Width(min) | Area     | Hight  | Area%   |
|------|---------|------|------------|----------|--------|---------|
| 1    | 17.487  | M    | 0.8156     | 10662893 | 340836 | 50.5434 |
| 2    | 27.924  | M    | 1.1372     | 10433614 | 239903 | 49.4566 |

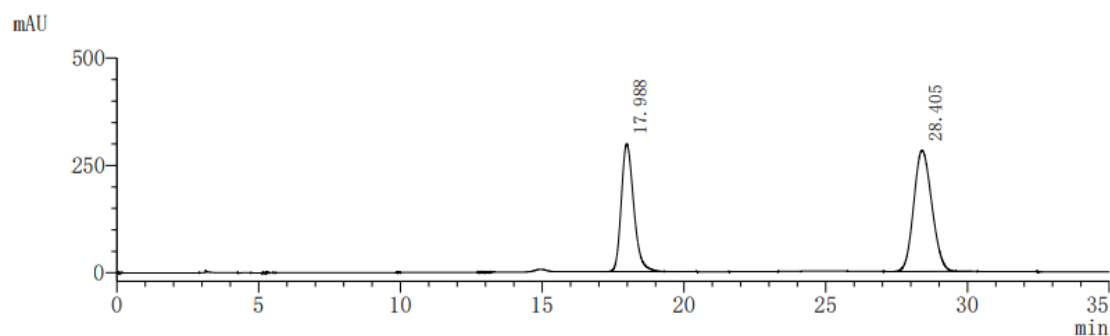

| Peak | PetTime | Type | Width(min) | Area     | Hight  | Area%   |
|------|---------|------|------------|----------|--------|---------|
| 1    | 17.988  | M    | 0.7917     | 9113555  | 297178 | 42.1027 |
| 2    | 28.405  | M    | 1.1831     | 12532437 | 282116 | 57.8973 |

**(S)-methyl 2-(2-(tert-butyl)-6-methylphenoxy)-3-formylbenzoate (3aa)**

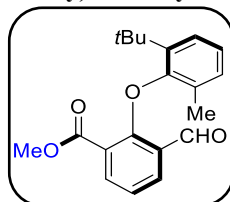

The title compound **3aa** was prepared under the optimized conditions and purified by preparative TLC (hexane : ethyl acetate = 10: 1). **3aa** was obtained as a light yellow oil (28.7 mg, 88%). **<sup>1</sup>H NMR (500 MHz, Chloroform-*d*)**  $\delta$  9.87 (s, 1H), 7.96 (dd, *J* = 7.8, 2.0 Hz, 1H), 7.82 (dd, *J* = 7.6, 2.0 Hz, 1H), 7.30 (dd, *J* = 7.8, 1.7 Hz, 1H), 7.18 – 7.15 (m, 1H), 7.06 (t, *J* = 7.6 Hz, 1H), 7.01 (dd, *J* = 7.6, 1.7 Hz, 1H), 3.63 (s, 3H), 1.89 (s, 3H), 1.45 (s, 9H). **<sup>13</sup>C NMR (150 MHz, Chloroform-*d*)**  $\delta$  188.10, 166.61, 157.21, 154.60, 140.91, 136.63, 132.24, 130.85, 127.60, 126.76, 125.80, 125.08, 123.64, 121.93, 52.32, 35.29, 30.30, 17.62.

**HRMS (ESI-TOF)** (*m/z*): Calcd for C<sub>20</sub>H<sub>22</sub>NaO<sub>4</sub>, ([*M* + Na]<sup>+</sup>), 349.1410; found 349.1404.

[ $\alpha$ ]<sub>D</sub><sup>20</sup> = -28.3 (*c* = 1.44, CH<sub>2</sub>Cl<sub>2</sub>).

**HPLC analysis:** Daicel Chiralpak IG column (99:1 hexane: 2-propanol, 1.0 mL/min, 25 °C, 254 nm); *t*<sub>R</sub> (major) = 8.05 min, *t*<sub>R</sub> (minor) = 8.55 min, 94% ee.

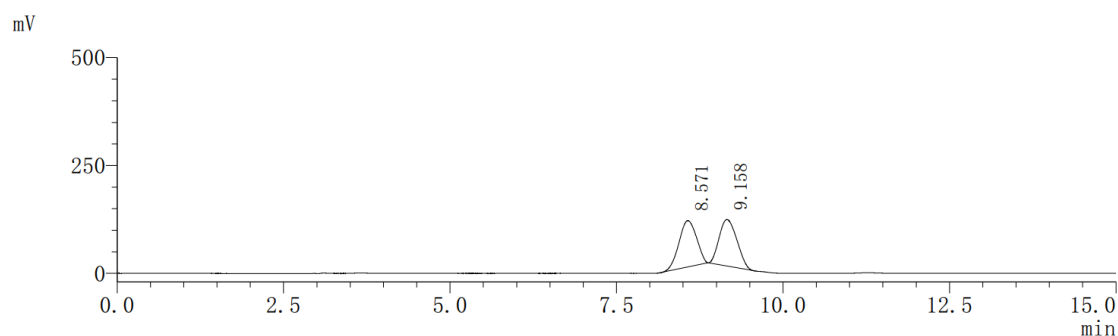

| Peak | PetTime | Type | Width(min) | Area    | Hight  | Area%   |
|------|---------|------|------------|---------|--------|---------|
| 1    | 8.571   | M    | 0.5025     | 1968180 | 107421 | 49.4968 |
| 2    | 9.158   | M    | 0.5134     | 2008198 | 108008 | 50.5032 |

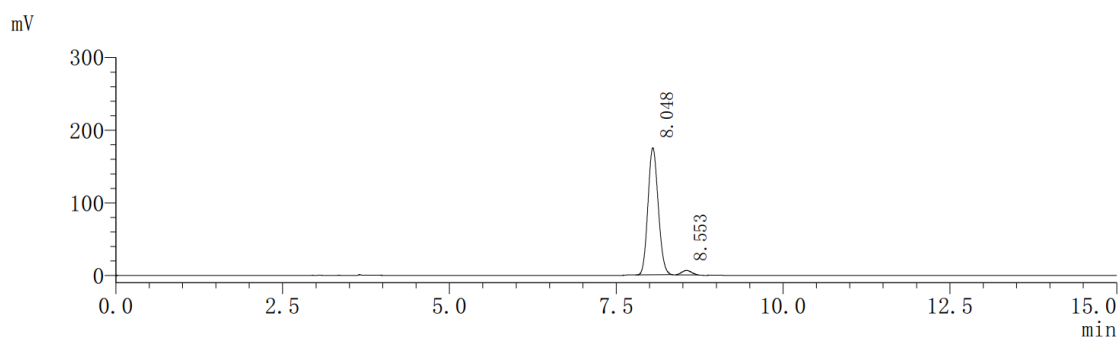

| Peak | PetTime | Type | Width(min) | Area    | Hight  | Area%   |
|------|---------|------|------------|---------|--------|---------|
| 1    | 8.048   | M    | 0.2848     | 1878369 | 174801 | 96.8287 |
| 2    | 8.553   | M    | 0.2771     | 61519   | 6055   | 3.1713  |

**(S)-ethyl 2-(2-(tert-butyl)-6-methylphenoxy)-3-formylbenzoate (3ab)**

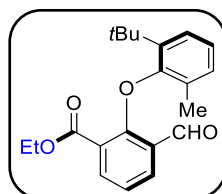

The title compound **3ab** was prepared under the optimized conditions and purified by preparative TLC (hexane : DCM = 2: 1). **3ab** was obtained as a yellow oil (26.2 mg, 77%). **<sup>1</sup>H NMR (500 MHz, Chloroform-*d*)**  $\delta$  9.77 (d, *J* = 0.9 Hz, 1H), 7.94 (dd, *J* = 7.8, 1.9 Hz, 1H), 7.82 (dd, *J* = 7.5, 1.9 Hz, 1H), 7.29 (dd, *J* = 7.8, 1.7 Hz, 1H), 7.16 (td, *J* = 7.7, 0.9 Hz, 1H), 7.06 (t, *J* = 7.6 Hz, 1H), 7.02 – 6.99 (m, 1H), 4.21 – 4.15 (m, 1H), 4.13 – 4.06 (m, 1H), 1.92 (s, 3H), 1.44 (s, 9H), 1.27 (t, *J* = 7.1 Hz, 3H). **<sup>13</sup>C NMR (150 MHz, Chloroform-*d*)**  $\delta$  188.08, 166.19, 157.16, 154.89, 140.89, 136.48, 132.10, 130.84, 127.74, 126.79, 125.81, 125.11, 124.29, 121.94, 61.57, 35.27, 30.32, 17.56, 14.10.

**HRMS** (ESI-TOF) (*m/z*): Calcd for C<sub>21</sub>H<sub>24</sub>NaO<sub>4</sub>, ([M + Na]<sup>+</sup>), 363.1567; found 363.1566.

**[ $\alpha$ ]<sub>D</sub><sup>20</sup>** = -30.8 (*c* = 1.31, CH<sub>2</sub>Cl<sub>2</sub>).

**HPLC analysis:** Daicel Chiralpak IG column (99:1 hexane: 2-propanol, 1.0 mL/min, 25 °C, 254 nm); *t<sub>R</sub>* (major) = 9.01 min, *t<sub>R</sub>* (minor) = 11.15 min, 96% ee.

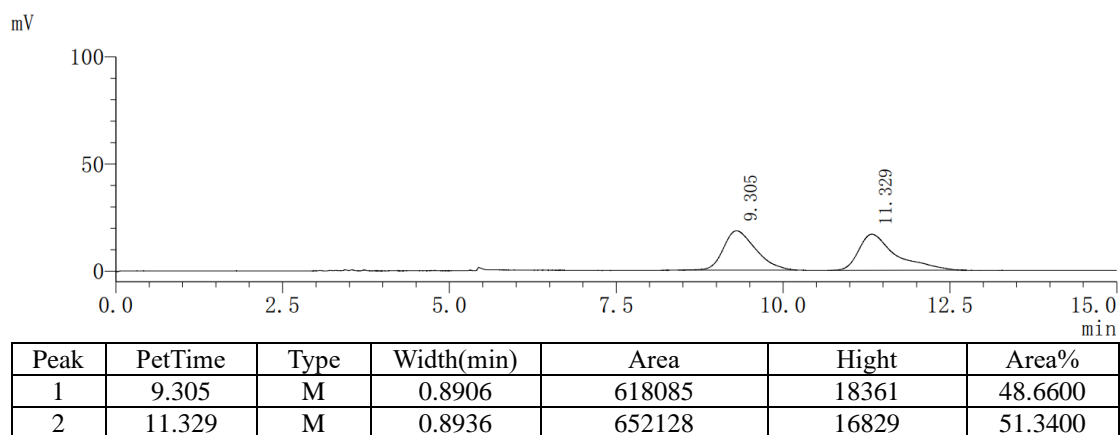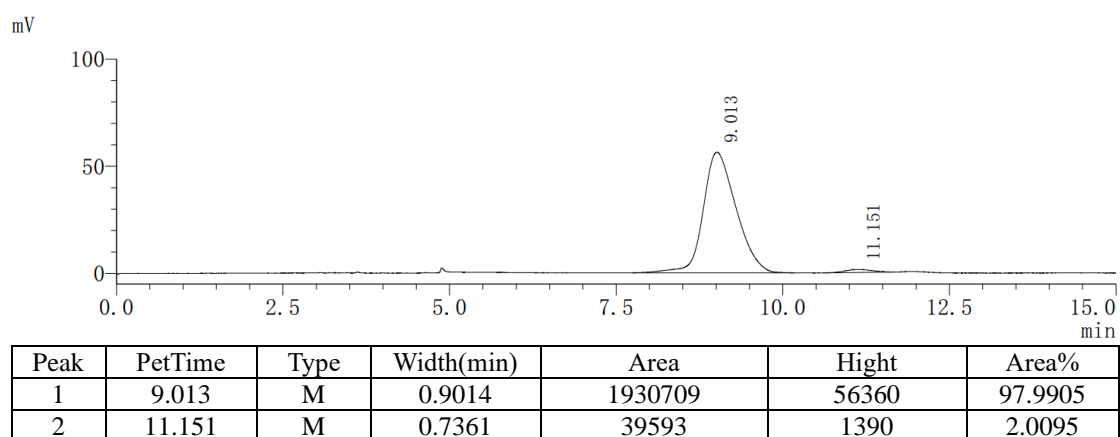

**(S)-cyclopropyl 2-(2-(tert-butyl)-6-methylphenoxy)-3-formylbenzoate (3ac)**

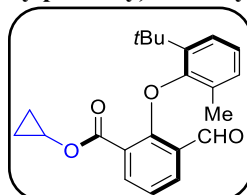

The title compound **3ac** was prepared under the optimized conditions and purified by preparative TLC (hexane : DCM = 1: 1). **3ac** was obtained as a yellow oil (26.4 mg, 75%). **<sup>1</sup>H NMR (600 MHz, Chloroform-*d*)**  $\delta$  9.67 (d, *J* = 0.9 Hz, 1H), 7.93 (dd, *J* = 7.8, 1.9 Hz, 1H), 7.82 (dd, *J* = 7.6, 1.9 Hz, 1H), 7.30 (dd, *J* = 7.9, 1.7 Hz, 1H), 7.15 (t, *J* = 7.7 Hz, 1H), 7.07 (t, *J* = 7.7 Hz, 1H), 7.01 (dd, *J* = 7.5, 1.7 Hz, 1H), 4.13 – 4.09 (m, 1H), 1.89 (s, 3H), 1.44 (s, 9H), 0.76 – 0.69 (m, 4H). **<sup>13</sup>C NMR (150 MHz, Chloroform-*d*)**  $\delta$  187.92, 166.92, 157.32, 155.10, 140.80, 136.54, 132.47, 130.96, 127.59, 126.86, 125.92, 125.18, 123.86, 121.96, 49.92, 35.27, 30.31, 17.53, 5.21, 5.01.

**HRMS** (ESI-TOF) (*m/z*): Calcd for C<sub>22</sub>H<sub>24</sub>NaO<sub>4</sub>, ([M + Na]<sup>+</sup>), 375.1567; found 375.1535.

**[ $\alpha$ ]<sub>D</sub><sup>20</sup>** = -25.9 (*c* = 1.32, CH<sub>2</sub>Cl<sub>2</sub>).

**HPLC analysis:** Daicel Chiralpak IG column (99:1 hexane: 2-propanol, 1.0 mL/min, 25 °C, 254 nm); *t<sub>R</sub>* (major) = 10.00 min, *t<sub>R</sub>* (minor) = 12.90 min, 90% ee.

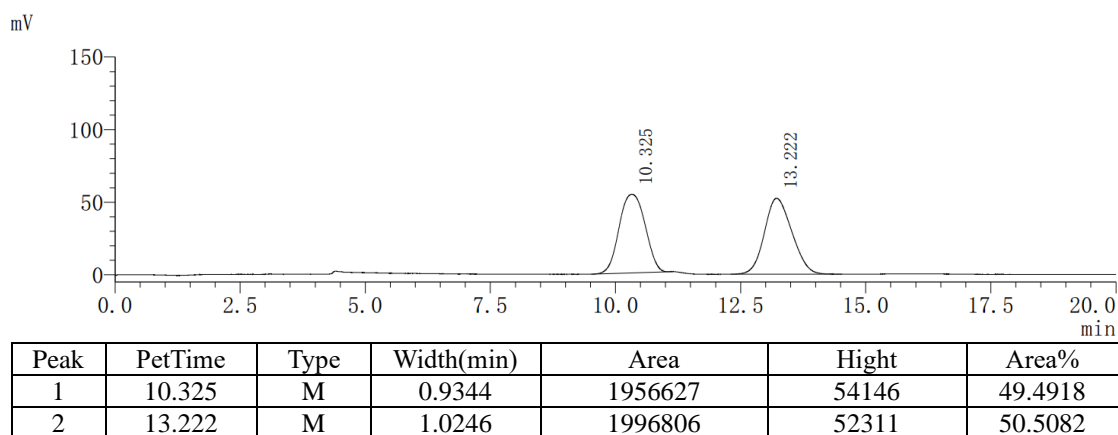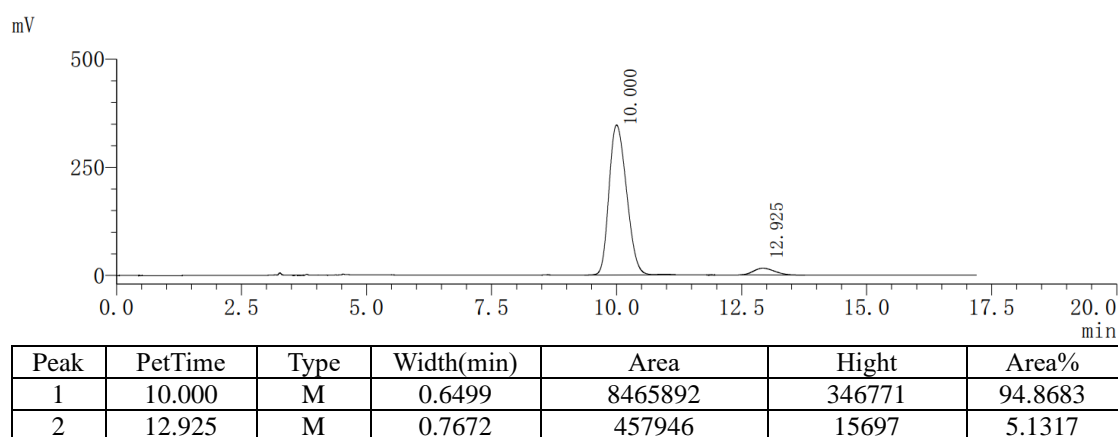

**(S)-cyclobutyl 2-(2-(tert-butyl)-6-methylphenoxy)-3-formylbenzoate (3ad)**

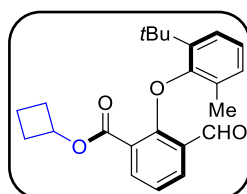

The title compound **3ad** was prepared under the optimized conditions and purified by preparative TLC (hexane : DCM = 1: 1). **3ad** was obtained as a yellow oil (25.6 mg, 70%). **<sup>1</sup>H NMR (500 MHz, Chloroform-*d*)**  $\delta$  9.70 (d, *J* = 0.9 Hz, 1H), 7.93 (dd, *J* = 7.8, 1.9 Hz, 1H), 7.83 (dd, *J* = 7.5, 1.9 Hz, 1H), 7.29 (dd, *J* = 7.9, 1.7 Hz, 1H), 7.16 (td, *J* = 7.6, 0.9 Hz, 1H), 7.07 (t, *J* = 7.7 Hz, 1H), 7.01 – 7.00 (m, 1H), 4.98 – 4.92 (m, 1H), 2.39 – 2.31 (m, 2H), 2.13 – 2.03 (m, 2H), 1.92 (s, 3H), 1.82 – 1.75 (m, 1H), 1.65 – 1.59 (m, 1H), 1.44 (s, 9H). **<sup>13</sup>C NMR (125 MHz, Chloroform-*d*)**  $\delta$  188.02, 165.54, 157.21, 155.08, 140.80, 136.54, 132.18, 130.93, 127.70, 126.81, 125.83, 125.11, 124.32, 121.96, 69.99, 35.25, 30.39, 30.32, 30.20, 17.56, 13.60.

**HRMS (ESI-TOF) (m/z):** Calcd for C<sub>23</sub>H<sub>26</sub>NaO<sub>4</sub>, ([M + Na]<sup>+</sup>), 389.1723; found 389.1731.

**[ $\alpha$ ]<sub>D</sub><sup>20</sup>** = -30.2 (c = 1.28, CH<sub>2</sub>Cl<sub>2</sub>).

**HPLC analysis:** Daicel Chiralpak IG column (99:1 hexane: 2-propanol, 1.0 mL/min, 25 °C, 254 nm); *t<sub>R</sub>* (major) = 8.66 min, *t<sub>R</sub>* (minor) = 11.34 min, 92% ee.

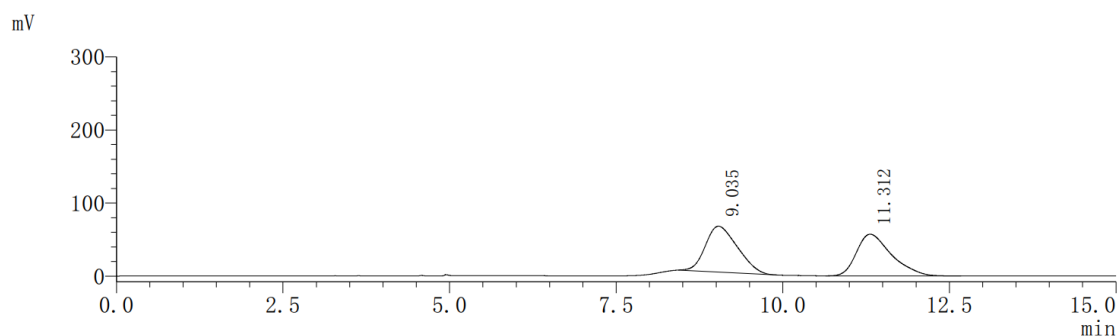

| Peak | PetTime | Type | Width(min) | Area    | Hight | Area%   |
|------|---------|------|------------|---------|-------|---------|
| 1    | 9.035   | M    | 0.9314     | 2109417 | 62867 | 50.3558 |
| 2    | 11.312  | M    | 0.9526     | 2079604 | 57016 | 49.6442 |

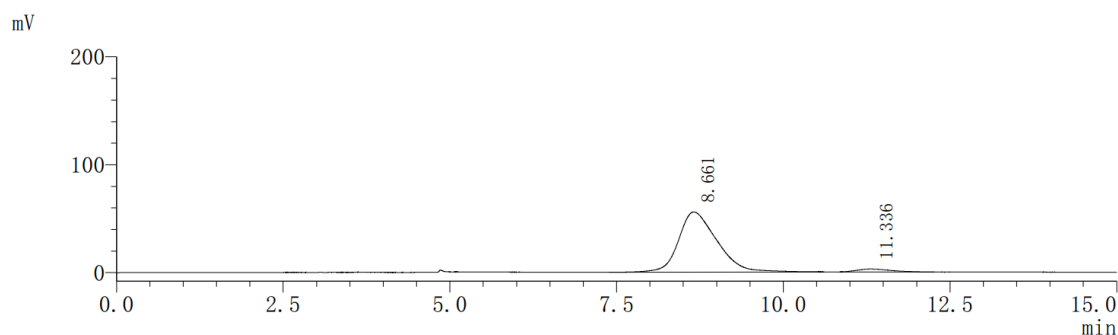

| Peak | PetTime | Type | Width(min) | Area    | Hight | Area%   |
|------|---------|------|------------|---------|-------|---------|
| 1    | 8.661   | M    | 1.0591     | 2227415 | 55767 | 95.8402 |
| 2    | 11.336  | M    | 0.8872     | 96678   | 2706  | 4.1598  |

**(S)-2,2,2-trifluoroethyl 2-(2-(tert-butyl)-6-methylphenoxy)-3-formylbenzoate (3ae)**

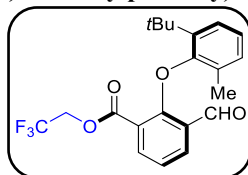

The title compound **3ae** was prepared under the optimized conditions and purified by preparative TLC (hexane : DCM = 2: 1). **3ae** was obtained as a yellow oil (28.8 mg, 73%). **<sup>1</sup>H NMR (500 MHz, Chloroform-*d*)**  $\delta$  9.70 (d, *J* = 0.9 Hz, 1H), 8.00 (dd, *J* = 7.7, 1.9 Hz, 1H), 7.90 (dd, *J* = 7.6, 1.9 Hz, 1H), 7.31 (dd, *J* = 7.9, 1.7 Hz, 1H), 7.20 (td, *J* = 7.7, 0.9 Hz, 1H), 7.09 (t, *J* = 7.7 Hz, 1H), 7.02 – 7.00 (m, 1H), 4.53 – 4.42 (m, 2H), 1.91 (s, 3H), 1.43 (s, 9H). **<sup>13</sup>C NMR (150 MHz, Chloroform-*d*)**  $\delta$  187.68, 163.92, 157.79, 154.81, 141.08, 136.82, 133.52, 130.87, 127.72, 126.98, 126.02, 125.43, 122.84 (q, *J* = 275.1 Hz), 122.01, 121.49, 60.92 (q, *J* = 36.4 Hz), 35.27, 30.26, 17.37. **<sup>19</sup>F NMR (565 MHz, CDCl<sub>3</sub>)**  $\delta$  -73.45 – -73.47 (m, CF<sub>3</sub>).

**HRMS (ESI-TOF) (m/z):** Calcd for C<sub>21</sub>H<sub>21</sub>F<sub>3</sub>NaO<sub>4</sub>, ([M + Na]<sup>+</sup>), 417.1284; found 417.1270.

**[ $\alpha$ ]<sub>D</sub><sup>20</sup>** = -23.2 (c = 1.43, CH<sub>2</sub>Cl<sub>2</sub>).

**HPLC analysis:** Daicel Chiralpak OD-3 column (99:1 hexane: 2-propanol, 1.0 mL/min, 25 °C, 254 nm); *t<sub>R</sub>* (minor) = 5.61 min, *t<sub>R</sub>* (major) = 6.01 min, 84% ee.

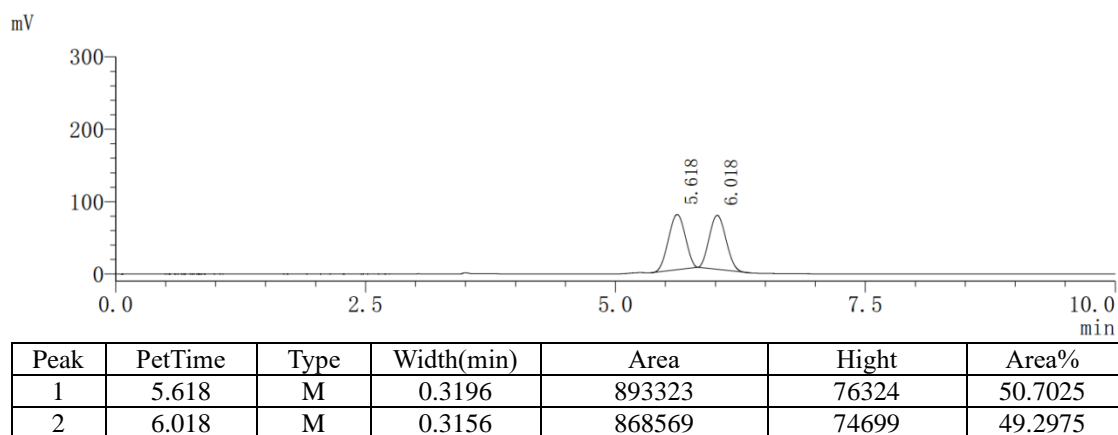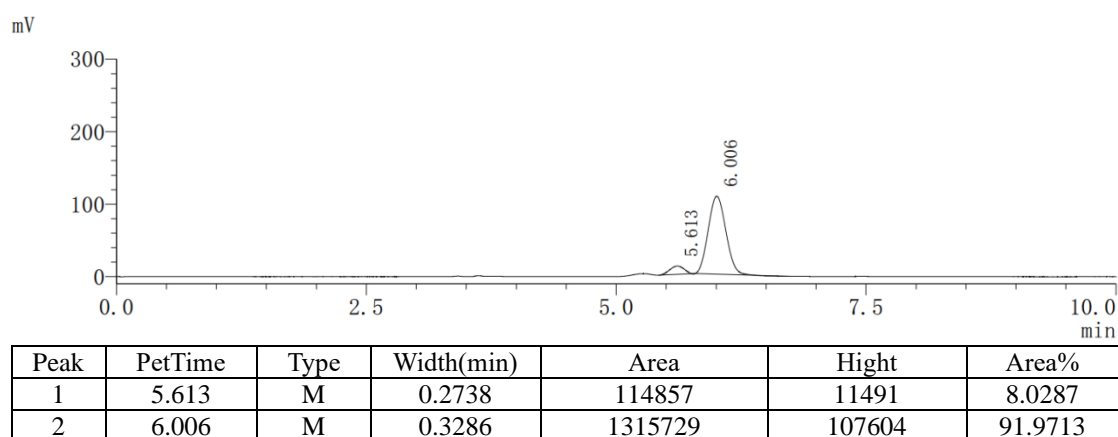

**(S)-2-(trimethylsilyl)ethyl 2-(2-(tert-butyl)-6-methylphenoxy)-3-formylbenzoate (3af)**

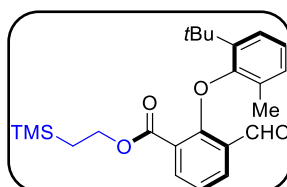

The title compound **3af** was prepared under the optimized conditions and purified by preparative TLC (hexane : ethyl acetate = 10: 1). **3af** was obtained as a yellow oil (35.5 mg, 86%). **<sup>1</sup>H NMR (500 MHz, Chloroform-*d*)**  $\delta$  9.81 (s, 1H), 7.93 (dd, *J* = 7.8, 1.9 Hz, 1H), 7.79 (dd, *J* = 7.6, 1.8 Hz, 1H), 7.29 (dd, *J* = 7.8, 1.8 Hz, 1H), 7.15 (t, *J* = 7.7 Hz, 1H), 7.06 (t, *J* = 7.6 Hz, 1H), 7.00 (dd, *J* = 7.6, 1.7 Hz, 1H), 4.16 (td, *J* = 10.8, 6.8 Hz, 1H), 4.08 (td, *J* = 10.8, 6.8 Hz, 1H), 1.92 (s, 3H), 1.45 (s, 9H), 1.06 – 0.95 (m, 2H), 0.04 (s, 9H). **<sup>13</sup>C NMR (150 MHz, Chloroform-*d*)**  $\delta$  189.74, 167.90, 158.64, 156.36, 142.56, 137.91, 133.51, 132.38, 129.43, 128.31, 127.36, 126.67, 126.02, 123.49, 65.53, 36.85, 31.92, 19.15, 18.88, 0.00. **HRMS (ESI-TOF) (m/z)**: Calcd for C<sub>24</sub>H<sub>32</sub>NaO<sub>4</sub>Si, ([M + Na]<sup>+</sup>), 435.1962; found 435.1949.

**[ $\alpha$ ]<sub>D</sub><sup>20</sup>** = -26.9 (*c* = 1.77, CH<sub>2</sub>Cl<sub>2</sub>).

**HPLC analysis**: Daicel Chiralpak OJ-3R column (20 mM Ammonium bicarbonate : Acetonitrile = 35 : 65 (v/v), 0.5 mL/min, 25 °C, 220 nm); *t<sub>R</sub>* (minor) = 20.70 min, *t<sub>R</sub>* (major) = 21.75 min, 83% ee.

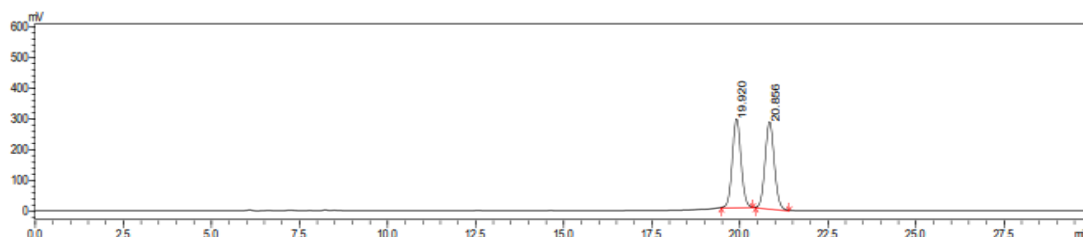

| Peak | PetTime | Type | Plate number | Area    | Tailing | Area%  |
|------|---------|------|--------------|---------|---------|--------|
| 1    | 19.920  | M    | 30525        | 4942743 | 1.059   | 49.244 |
| 2    | 20.856  | M    | 30129        | 5094508 | 1.076   | 50.756 |

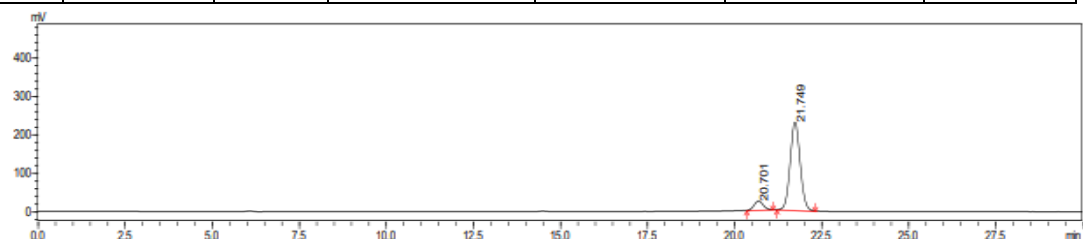

| Peak | PetTime | Type | Plate number | Area    | Tailing | Area%  |
|------|---------|------|--------------|---------|---------|--------|
| 1    | 20.701  | M    | 28921        | 422746  | 1.051   | 8.455  |
| 2    | 21.749  | M    | 26866        | 4577176 | 1.060   | 91.545 |

**(S)-but-3-en-1-yl 2-(2-(tert-butyl)-6-methylphenoxy)-3-formylbenzoate (**3ag**)**

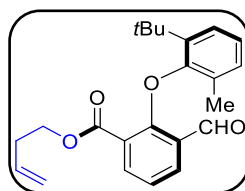

The title compound **3ag** was prepared under the optimized conditions and purified by preparative TLC (hexane : ethyl acetate = 10: 1). **3ag** was obtained as a yellow oil (22.0 mg, 60%). **<sup>1</sup>H NMR (500 MHz, Chloroform-*d*)**  $\delta$  9.73 (s, 1H), 7.94 (dd, *J* = 7.8, 1.8 Hz, 1H), 7.82 (dd, *J* = 7.6, 1.8 Hz, 1H), 7.29 (dd, *J* = 7.9, 1.6 Hz, 1H), 7.15 (t, *J* = 7.6 Hz, 1H), 7.06 (t, *J* = 7.6 Hz, 1H), 7.00 (d, *J* = 7.4 Hz, 1H), 5.80 – 5.71 (m, 1H), 5.10 – 4.01 (m, 2H), 4.18 – 4.12 (m, 2H), 2.43 – 2.39 (m, 2H), 1.91 (s, 3H), 1.44 (s, 9H). **<sup>13</sup>C NMR (150 MHz, Chloroform-*d*)**  $\delta$  188.02, 166.00, 157.25, 154.96, 140.85, 136.53, 133.71, 132.24, 130.86, 127.65, 126.83, 125.84, 125.11, 124.05, 121.94, 117.36, 64.52, 35.27, 32.93, 30.33, 17.59.

**HRMS** (ESI-TOF) (*m/z*): Calcd for C<sub>23</sub>H<sub>26</sub>NaO<sub>4</sub>, ([M + Na]<sup>+</sup>), 389.1723; found 389.1715.

**[ $\alpha$ ]<sub>D</sub><sup>20</sup>** = -38.9 (*c* = 1.09, CH<sub>2</sub>Cl<sub>2</sub>).

**HPLC analysis:** Daicel Chiralpak IG column (99:1 hexane: 2-propanol, 1.0 mL/min, 25 °C, 254 nm); *t<sub>R</sub>* (major) = 7.21 min, *t<sub>R</sub>* (minor) = 8.30 min, 90% ee.

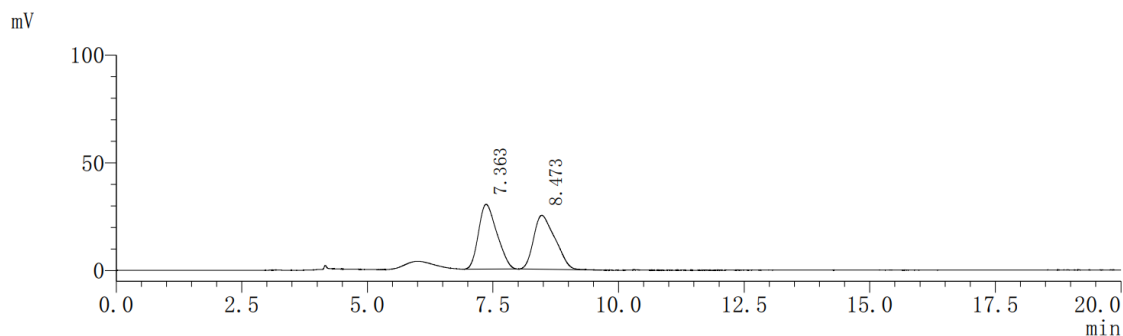

| Peak | PetTime | Type | Width(min) | Area   | Hight | Area%   |
|------|---------|------|------------|--------|-------|---------|
| 1    | 7.363   | M    | 0.7106     | 767502 | 30095 | 50.6721 |
| 2    | 8.473   | M    | 0.8798     | 747143 | 25110 | 49.3279 |

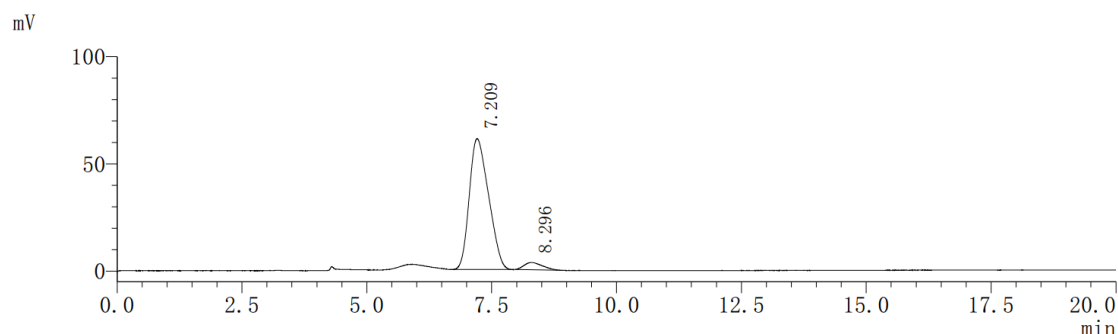

| Peak | PetTime | Type | Width(min) | Area    | Hight | Area%   |
|------|---------|------|------------|---------|-------|---------|
| 1    | 7.209   | M    | 0.7576     | 1641250 | 61011 | 94.9902 |
| 2    | 8.296   | M    | 0.7490     | 86559   | 3385  | 5.0098  |

**(S)-cinnamyl 2-(2-(tert-butyl)-6-methylphenoxy)-3-formylbenzoate (3ah)**

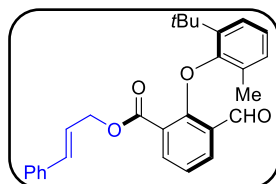

The title compound **3ah** was prepared under the optimized conditions and purified by preparative TLC (hexane : ethyl acetate = 10: 1). **3ah** was obtained as a yellow oil (32.5 mg, 76%). **<sup>1</sup>H NMR (500 MHz, Chloroform-*d*)**  $\delta$  9.80 (s, 1H), 7.96 (dd, *J* = 7.8, 1.9 Hz, 1H), 7.87 (dd, *J* = 7.6, 1.9 Hz, 1H), 7.31 – 7.29 (m, 5H), 7.27 – 7.24 (m, 1H), 7.17 (t, *J* = 7.7 Hz, 1H), 7.07 (t, *J* = 7.7 Hz, 1H), 7.01 (d, *J* = 7.4 Hz, 1H), 6.63 (d, *J* = 15.9 Hz, 1H), 6.25 (dt, *J* = 15.9, 6.4 Hz, 1H), 4.81 – 4.76 (m, 1H), 4.69 – 4.64 (m, 1H), 1.93 (s, 3H), 1.43 (s, 9H). **<sup>13</sup>C NMR (150 MHz, Chloroform-*d*)**  $\delta$  188.05, 165.91, 157.28, 154.86, 140.93, 136.70, 136.07, 134.48, 132.36, 130.92, 128.57, 128.10, 127.71, 126.85, 126.57, 125.90, 125.14, 123.81, 122.58, 122.00, 66.08, 35.29, 30.32, 17.65.

**HRMS (ESI-TOF)** (*m/z*): Calcd for C<sub>28</sub>H<sub>28</sub>NaO<sub>4</sub>, ([M + Na]<sup>+</sup>), 451.1880; found 451.1869.

[ $\alpha$ ]<sub>D</sub><sup>20</sup> = -23.7 (*c* = 1.62, CH<sub>2</sub>Cl<sub>2</sub>).

**HPLC analysis:** Daicel Chiralpak OD-3 column (99.5:0.5 hexane: 2-propanol, 0.6 mL/min, 25 °C, 254 nm); *t<sub>R</sub>* (major) = 15.50 min, *t<sub>R</sub>* (minor) = 17.72 min, 90% ee.

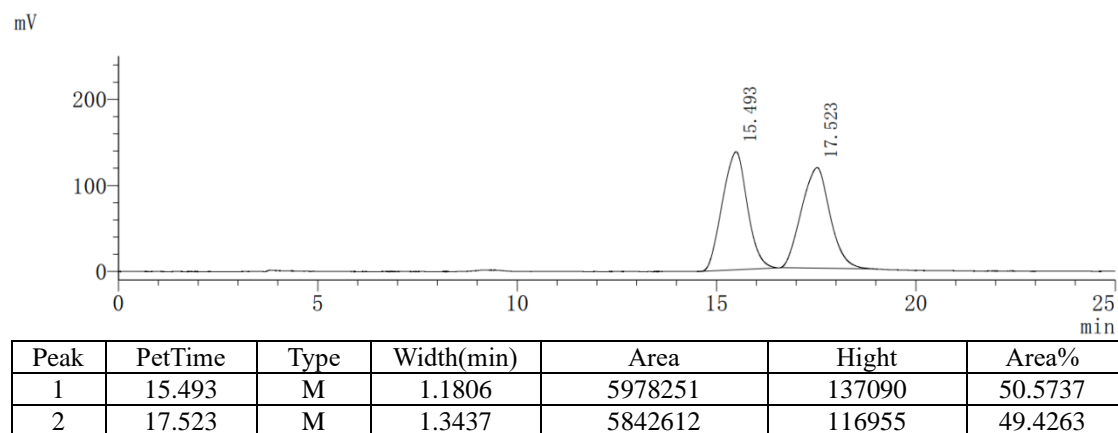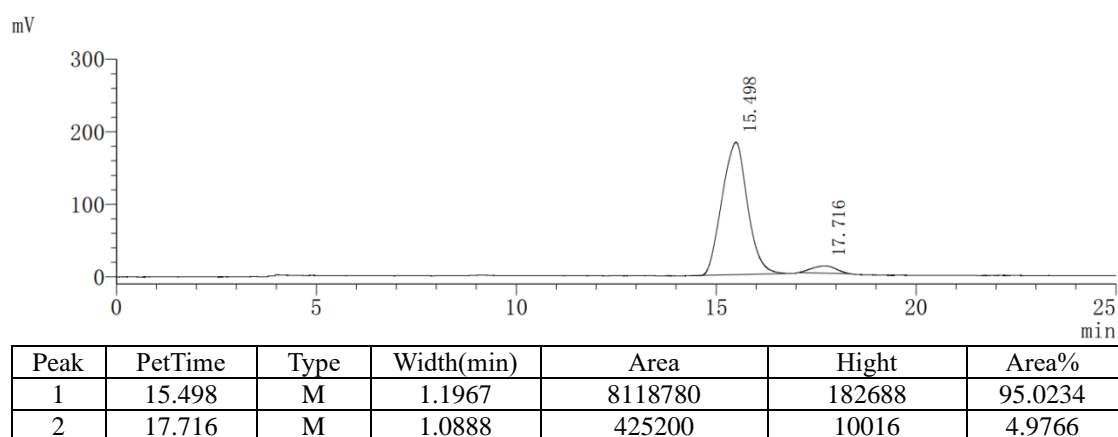

**(S)-pent-4-yn-1-yl 2-(2-(tert-butyl)-6-methylphenoxy)-3-formylbenzoate (3ai)**

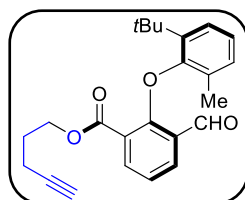

The title compound **3ai** was prepared under the optimized conditions and purified by preparative TLC (hexane : ethyl acetate = 10: 1). **3ai** was obtained as a yellow oil (20.8 mg, 55%). **<sup>1</sup>H NMR (500 MHz, Chloroform-*d*)**  $\delta$  9.73 (d, *J* = 1.0 Hz, 1H), 7.95 (dd, *J* = 7.8, 1.8 Hz, 1H), 7.84 (dd, *J* = 7.5, 1.8 Hz, 1H), 7.30 (dd, *J* = 7.8, 1.6 Hz, 1H), 7.16 (dd, *J* = 7.7, 1.0 Hz, 1H), 7.07 (t, *J* = 7.7 Hz, 1H), 7.01 (dd, *J* = 7.7, 1.6 Hz, 1H), 4.26 – 4.16 (m, 2H), 2.26 (td, *J* = 7.1, 2.6 Hz, 2H), 1.92 (s, 3H), 1.92 – 1.85 (m, 2H), 1.58 (s, 1H), 1.44 (s, 9H). **<sup>13</sup>C NMR (150 MHz, Chloroform-*d*)**  $\delta$  188.02, 165.99, 157.28, 154.91, 140.87, 136.58, 132.37, 130.90, 127.59, 126.86, 125.91, 125.20, 123.89, 121.97, 82.75, 69.14, 64.05, 35.28, 30.32, 27.40, 17.56, 15.17.

**HRMS (ESI-TOF) (m/z):** Calcd for C<sub>24</sub>H<sub>26</sub>NaO<sub>4</sub>, ([M + Na]<sup>+</sup>), 401.1723; found 401.1719.

**[ $\alpha$ ]<sub>D</sub><sup>20</sup>** = -23.3 (c = 1.03, CH<sub>2</sub>Cl<sub>2</sub>).

**HPLC analysis:** Daicel Chiralpak IG column (99:1 hexane: 2-propanol, 1.0 mL/min, 25 °C, 254 nm); t<sub>R</sub> (major) = 10.95 min, t<sub>R</sub> (minor) = 12.25 min, 85% ee.

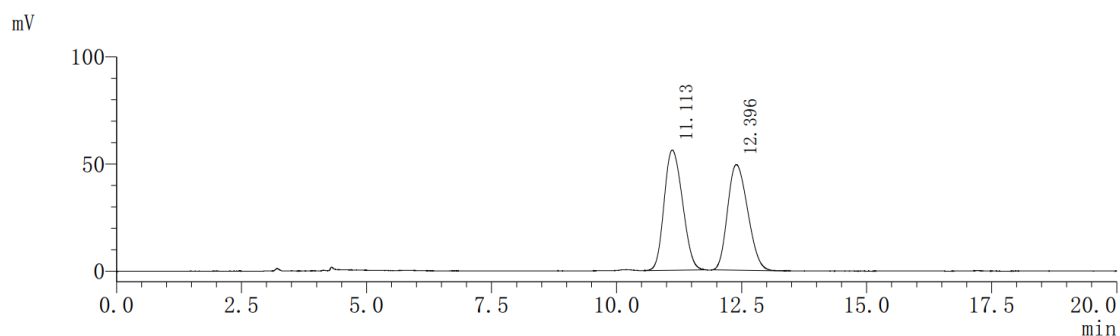

| Peak | PetTime | Type | Width(min) | Area    | Hight | Area%   |
|------|---------|------|------------|---------|-------|---------|
| 1    | 11.113  | M    | 0.6864     | 1435806 | 56138 | 50.9760 |
| 2    | 12.396  | M    | 0.7479     | 1380825 | 49327 | 49.0240 |

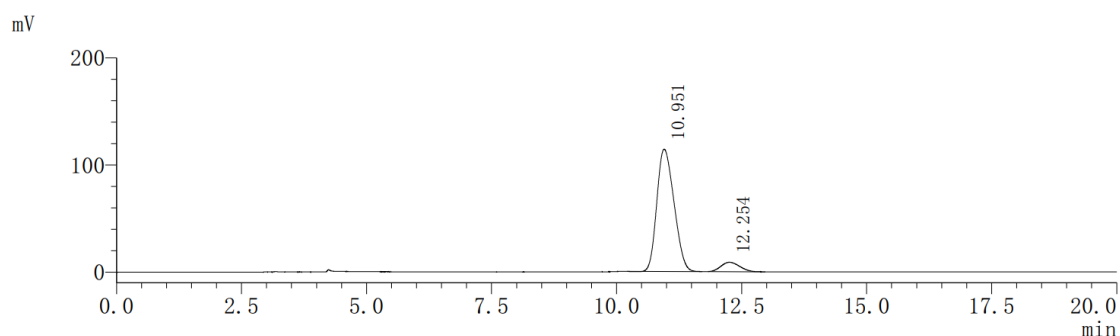

| Peak | PetTime | Type | Width(min) | Area    | Hight  | Area%   |
|------|---------|------|------------|---------|--------|---------|
| 1    | 10.951  | M    | 0.6458     | 2724562 | 114233 | 92.3631 |
| 2    | 12.254  | M    | 0.7148     | 225277  | 8732   | 7.6369  |

**(S)-2-bromobenzyl 2-(2-(tert-butyl)-6-methylphenoxy)-3-formylbenzoate (3aj)**

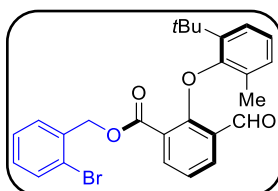

The title compound **3aj** was prepared under the optimized conditions and purified by preparative TLC (hexane : ethyl acetate = 10:1). **3aj** was obtained as a yellow oil (30.2 mg, 63%). **<sup>1</sup>H NMR (500 MHz, Chloroform-*d*)**  $\delta$  9.74 (s, 1H), 7.95 (dd, *J* = 7.8, 1.9 Hz, 1H), 7.90 (dd, *J* = 7.6, 1.9 Hz, 1H), 7.57 (dd, *J* = 7.9, 1.3 Hz, 1H), 7.40 (dd, *J* = 7.6, 1.7 Hz, 1H), 7.29 (dd, *J* = 7.9, 1.6 Hz, 1H), 7.26 – 7.23 (m, 1H), 7.20 – 7.15 (m, 2H), 7.08 (t, *J* = 7.7 Hz, 1H), 6.99 (d, *J* = 7.4 Hz, 1H), 5.21 (s, 2H), 1.91 (s, 3H), 1.39 (s, 9H). **<sup>13</sup>C NMR (150 MHz, Chloroform-*d*)**  $\delta$  187.97, 165.47, 157.45, 154.90, 140.94, 136.73, 134.82, 132.86, 132.55, 130.86, 130.14, 129.84, 127.71, 127.43, 126.87, 125.93, 125.24, 123.57, 123.46, 121.97, 66.77, 35.26, 30.30, 17.62.

**HRMS (ESI-TOF) (m/z):** Calcd for C<sub>26</sub>H<sub>25</sub>BrNaO<sub>4</sub>, ([M + Na]<sup>+</sup>), 503.0828; found 503.0832.

**[ $\alpha$ ]<sub>D</sub><sup>20</sup>** = -33.7 (c = 1.51, CH<sub>2</sub>Cl<sub>2</sub>).

**HPLC analysis:** Daicel Chiralpak IG column (99.5:0.5 hexane: 2-propanol, 1 mL/min, 25 °C, 254 nm); t<sub>R</sub> (major) = 11.38 min, t<sub>R</sub> (minor) = 12.38 min, 90% ee.

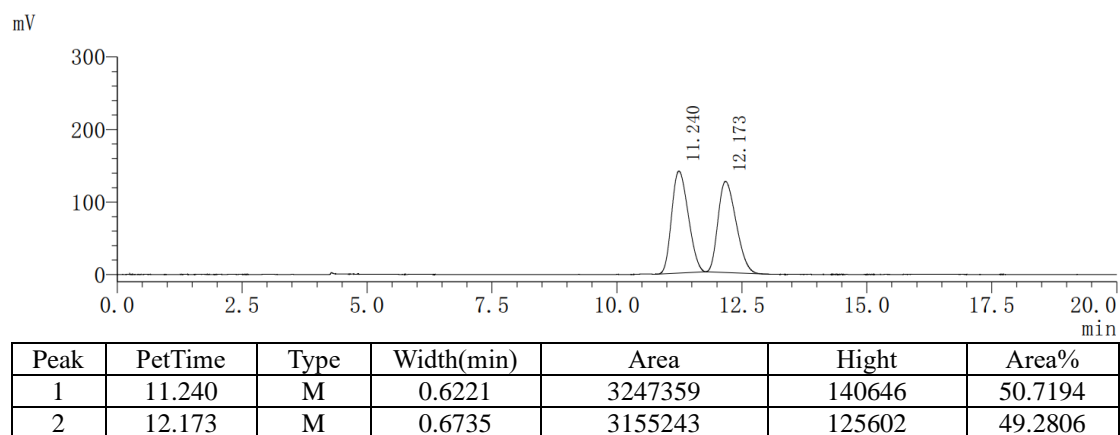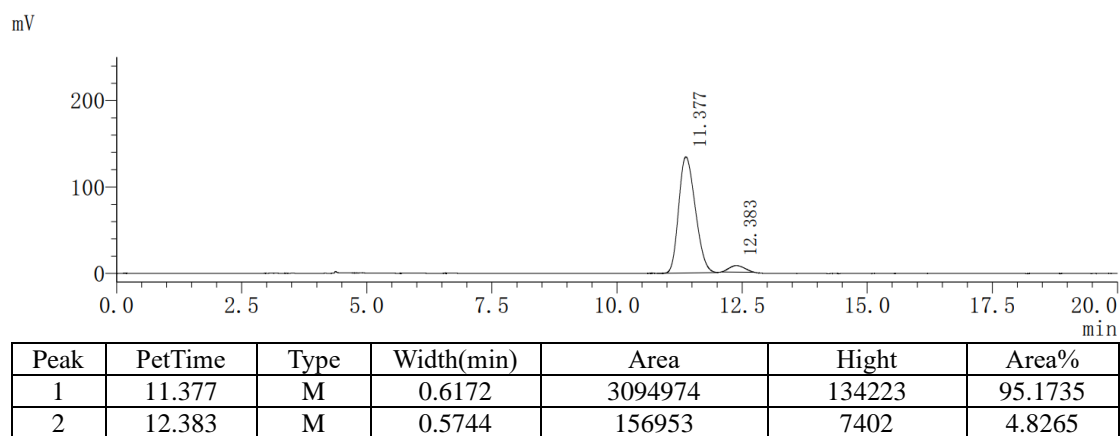

**(S)-phenyl 2-(2-(tert-butyl)-6-methylphenoxy)-3-formylbenzoate (3ak)**

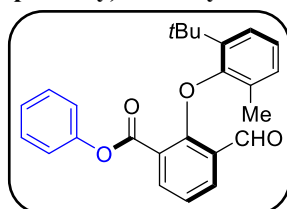

The title compound **3ak** was prepared under the optimized conditions and purified by preparative TLC (hexane : diethyl ether = 10: 1). **3ak** was obtained as a yellow oil (27.2 mg, 70%). **<sup>1</sup>H NMR (600 MHz, Chloroform-*d*)**  $\delta$  9.65 (d, *J* = 0.8 Hz, 1H), 8.09 (dd, *J* = 7.6, 1.9 Hz, 1H), 8.01 (dd, *J* = 7.8, 1.9 Hz, 1H), 7.39 – 7.36 (m, 2H), 7.29 (dd, *J* = 7.8, 1.7 Hz, 1H), 7.25 – 7.22 (m, 2H), 7.09 – 7.06 (m, 3H), 7.04 – 7.03 (m, 1H), 1.97 (s, 3H), 1.45 (s, 9H). **<sup>13</sup>C NMR (150 MHz, Chloroform-*d*)**  $\delta$  187.77, 164.36, 157.87, 155.41, 150.53, 140.78, 137.08, 133.26, 131.14, 129.42, 127.36, 127.12, 126.13, 126.02, 125.28, 123.26, 122.15, 121.47, 35.31, 30.31, 17.68.

**HRMS** (ESI-TOF) (*m/z*): Calcd for C<sub>25</sub>H<sub>24</sub>NaO<sub>4</sub>, ([M + Na]<sup>+</sup>), 411.1567; found 411.1571.

**[ $\alpha$ ]<sub>D</sub><sup>20</sup>** = -25.6 (*c* = 1.36, CH<sub>2</sub>Cl<sub>2</sub>).

**HPLC analysis:** Daicel Chiralpak IG column (99:1 hexane: 2-propanol, 1 mL/min, 25 °C, 254 nm); *t<sub>R</sub>* (major) = 13.52 min, *t<sub>R</sub>* (minor) = 15.07 min, 96% ee.

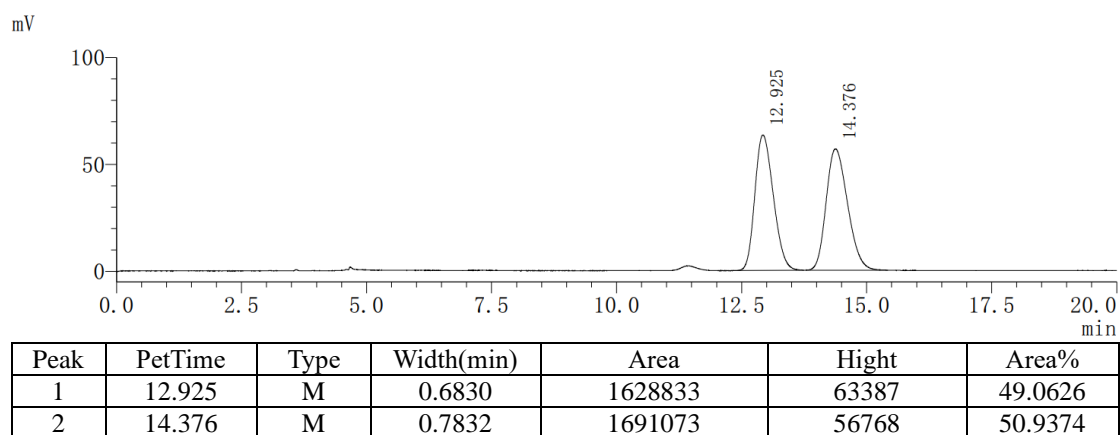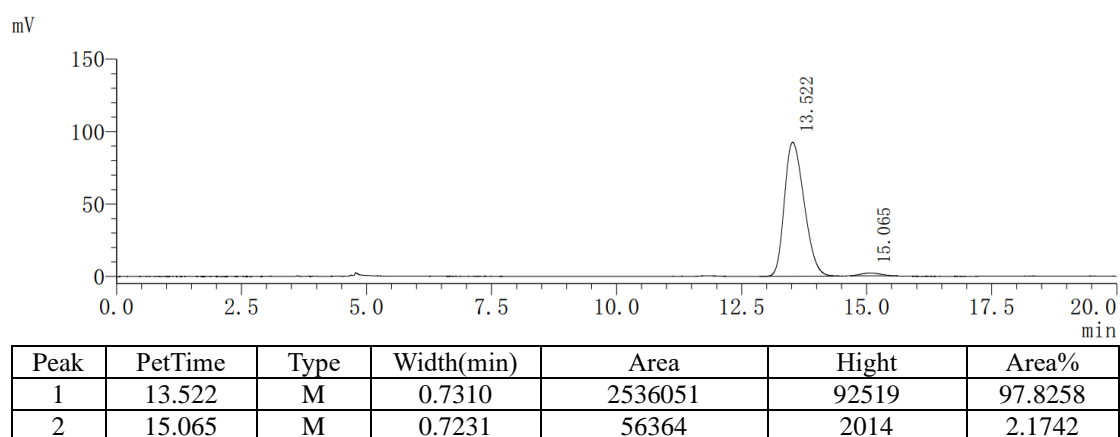

**(S)-p-tolyl 2-(2-(tert-butyl)-6-methylphenoxy)-3-formylbenzoate (3al)**

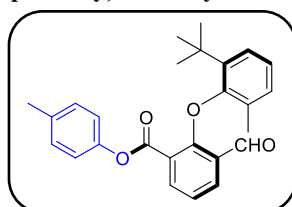

The title compound **3al** was prepared under the optimized conditions and purified by preparative TLC (hexane : ethyl acetate = 10: 1). **3al** was obtained as a yellow oil (32.2 mg, 80%). **<sup>1</sup>H NMR (500 MHz, Chloroform-*d*)**  $\delta$  9.65 (s, 1H), 8.07 (dd, *J* = 7.6, 1.9 Hz, 1H), 8.00 (dd, *J* = 7.8, 1.9 Hz, 1H), 7.29 (dd, *J* = 7.9, 1.8 Hz, 1H), 7.23 (t, *J* = 7.7 Hz, 1H), 7.16 (d, *J* = 8.2 Hz, 2H), 7.08 (t, *J* = 7.6 Hz, 1H), 7.03 (dd, *J* = 7.6, 1.7 Hz, 1H), 6.95 – 6.94 (m, 2H), 2.34 (s, 3H), 1.97 (s, 3H), 1.44 (s, 9H). **<sup>13</sup>C NMR (125 MHz, Chloroform-*d*)**  $\delta$  187.81, 164.58, 157.83, 155.42, 148.32, 140.81, 137.04, 135.68, 133.14, 131.13, 129.91, 127.39, 127.12, 126.12, 125.25, 123.44, 122.13, 121.14, 35.31, 30.31, 20.85, 17.67.

**HRMS (ESI-TOF)** (*m/z*): Calcd for C<sub>26</sub>H<sub>26</sub>NaO<sub>4</sub>, ([M + Na]<sup>+</sup>), 425.1723; found 425.1720.

**[ $\alpha$ ]<sub>D</sub><sup>20</sup>** = -25.6 (*c* = 1.60, CH<sub>2</sub>Cl<sub>2</sub>).

**HPLC analysis:** Daicel Chiralpak IG column (99:1 hexane: 2-propanol, 1 mL/min, 25 °C, 254 nm); *t<sub>R</sub>* (major) = 19.82 min, *t<sub>R</sub>* (minor) = 21.06 min, 95% ee.

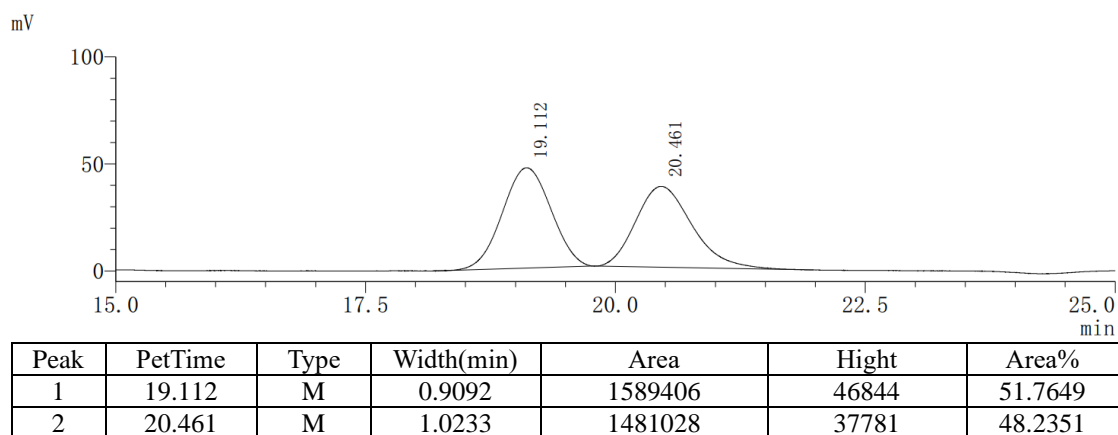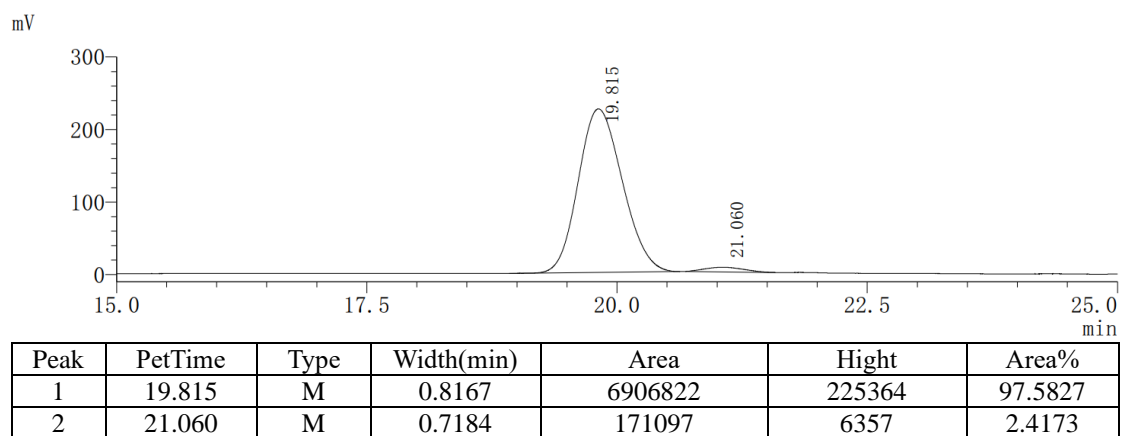

**(S)-4-bromophenyl 2-(2-(tert-butyl)-6-methylphenoxy)-3-formylbenzoate (**3am**)**

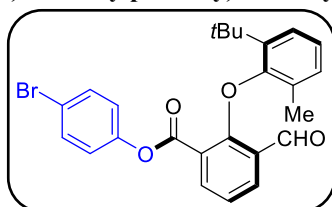

The title compound **3am** was prepared under the optimized conditions and purified by preparative TLC (hexane : ethyl acetate = 10: 1). **3am** was obtained as a yellow oil (23.8 mg, 51%). **<sup>1</sup>H NMR (600 MHz, Chloroform-*d*)**  $\delta$  9.67 (d, *J* = 0.8 Hz, 1H), 8.06 (dd, *J* = 7.6, 1.9 Hz, 1H), 8.02 (dd, *J* = 7.8, 1.9 Hz, 1H), 7.50 – 7.47 (m, 2H), 7.29 (dd, *J* = 7.9, 1.7 Hz, 1H), 7.26 – 7.23 (m, 1H), 7.08 (t, *J* = 7.7 Hz, 1H), 7.04 – 7.02 (m, 1H), 6.96 – 6.93 (m, 2H), 1.95 (s, 3H), 1.43 (s, 9H). **<sup>13</sup>C NMR (150 MHz, Chloroform-*d*)**  $\delta$  187.70, 163.95, 157.93, 155.27, 149.52, 140.87, 137.09, 133.53, 132.47, 131.15, 127.33, 127.22, 126.22, 125.36, 123.28, 122.72, 122.19, 119.16, 35.33, 30.33, 17.69.

**HRMS** (ESI-TOF) (*m/z*): Calcd for C<sub>25</sub>H<sub>23</sub>BrNaO<sub>4</sub>, ([M + Na]<sup>+</sup>), 489.0672; found 489.0659.

**[ $\alpha$ ]<sub>D</sub><sup>20</sup>** = -25.9 (*c* = 1.19, CH<sub>2</sub>Cl<sub>2</sub>).

**HPLC analysis:** Daicel Chiralpak IG column (99:1 hexane: 2-propanol, 1 mL/min, 25 °C, 256 nm); *t<sub>R</sub>* (major) = 16.25 min, *t<sub>R</sub>* (minor) = 19.09 min, 94% ee.

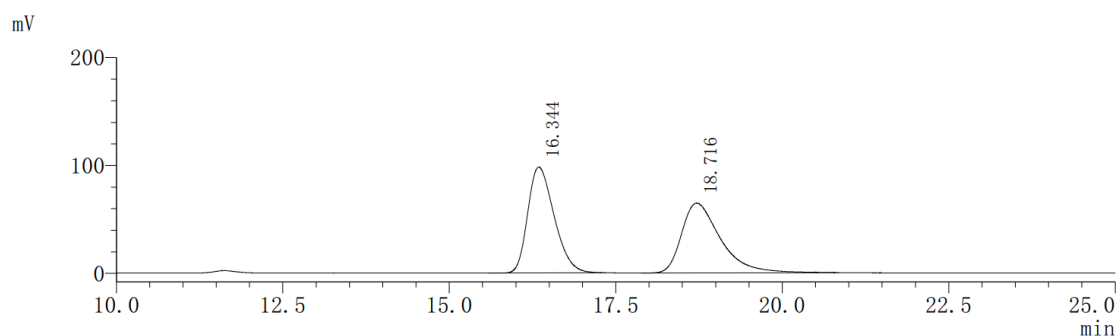

| Peak | PetTime | Type | Width(min) | Area    | Hight | Area%   |
|------|---------|------|------------|---------|-------|---------|
| 1    | 16.344  | M    | 0.7291     | 2711091 | 98199 | 50.8174 |
| 2    | 18.716  | M    | 1.0435     | 2623870 | 64667 | 49.1826 |

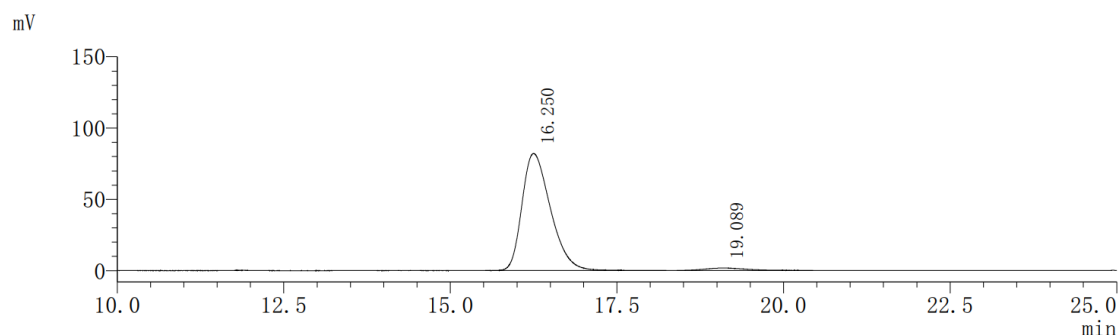

| Peak | PetTime | Type | Width(min) | Area    | Hight | Area%   |
|------|---------|------|------------|---------|-------|---------|
| 1    | 16.250  | M    | 0.7822     | 2443877 | 82117 | 96.9631 |
| 2    | 19.089  | M    | 1.0020     | 76542   | 1758  | 3.0369  |

**(S)-naphthalen-1-yl 2-(2-(tert-butyl)-6-methylphenoxy)-3-formylbenzoate (3an)**

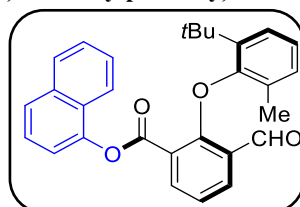

The title compound **3an** was prepared under the optimized conditions and purified by preparative TLC (hexane : ethyl acetate = 10:1). **3an** was obtained as a yellow oil (32.9 mg, 75%). **<sup>1</sup>H NMR (600 MHz, Chloroform-*d*)**  $\delta$  9.57 (s, 1H), 8.26 (dd, *J* = 7.5, 1.9 Hz, 1H), 8.04 (dd, *J* = 7.8, 1.9 Hz, 1H), 7.93 (d, *J* = 8.4 Hz, 1H), 7.87 (d, *J* = 8.2 Hz, 1H), 7.76 (d, *J* = 8.3 Hz, 1H), 7.51 – 7.43 (m, 3H), 7.31 – 7.28 (m, 2H), 7.23 (t, *J* = 8.0 Hz, 1H), 7.09 (t, *J* = 7.7 Hz, 1H), 7.04 (dd, *J* = 7.5, 1.8 Hz, 1H), 2.03 (s, 3H), 1.44 (s, 9H). **<sup>13</sup>C NMR (150 MHz, Chloroform-*d*)**  $\delta$  187.66, 164.33, 158.13, 155.62, 146.50, 140.82, 137.14, 134.68, 133.60, 131.22, 128.05, 127.44, 127.33, 126.70, 126.47, 126.44, 126.21, 125.42, 125.37, 123.28, 122.26, 121.19, 118.16, 35.32, 30.35, 17.71.

**HRMS (ESI-TOF) (m/z):** Calcd for C<sub>29</sub>H<sub>26</sub>NaO<sub>4</sub>, ([M + Na]<sup>+</sup>), 461.1723; found 461.1731.

**[ $\alpha$ ]<sub>D</sub><sup>20</sup>** = -25.5 (*c* = 1.64, CH<sub>2</sub>Cl<sub>2</sub>).

**HPLC analysis:** Daicel Chiralpak OD-3 column (99.5:0.5 hexane: 2-propanol, 1 mL/min, 25 °C, 254 nm); *t<sub>R</sub>* (major) = 17.35 min, *t<sub>R</sub>* (minor) = 20.24 min, 97% ee.

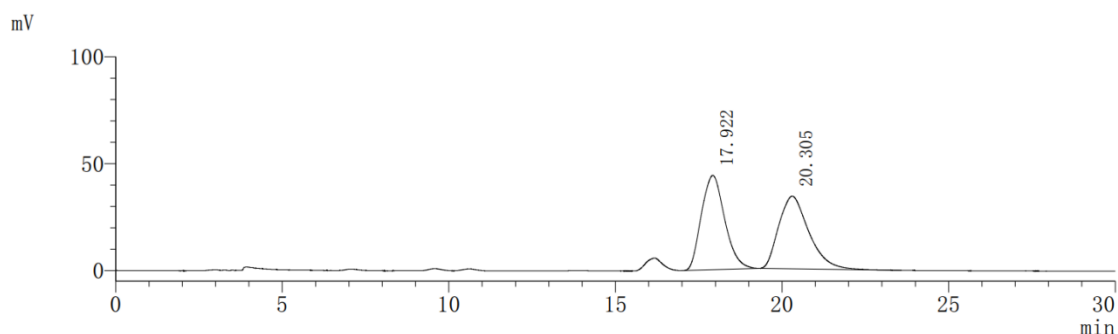

| Peak | PetTime | Type | Width(min) | Area    | Hight | Area%   |
|------|---------|------|------------|---------|-------|---------|
| 1    | 17.922  | M    | 1.3199     | 2147777 | 44175 | 50.0937 |
| 2    | 20.305  | M    | 1.6769     | 2139741 | 34052 | 49.9063 |

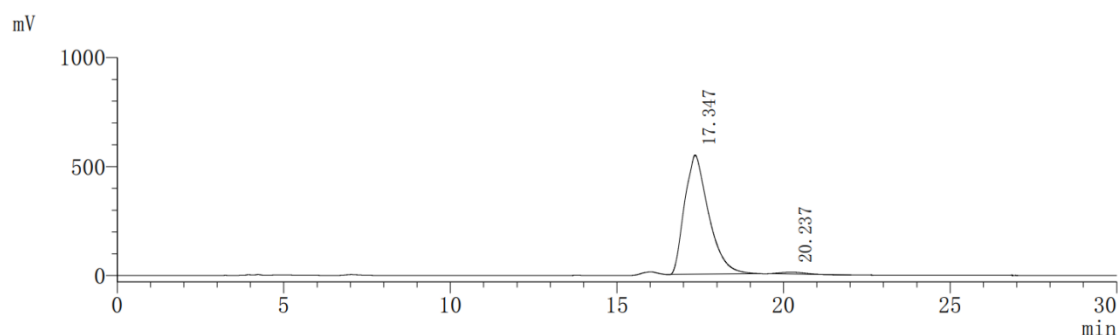

| Peak | PetTime | Type | Width(min) | Area     | Hight  | Area%   |
|------|---------|------|------------|----------|--------|---------|
| 1    | 17.347  | M    | 1.3680     | 27391981 | 546537 | 98.6772 |
| 2    | 20.237  | M    | 1.3401     | 367212   | 8095   | 1.3228  |

**(S)-pyridin-3-yl 2-(2-(tert-butyl)-6-methylphenoxy)-3-formylbenzoate (3ao)**

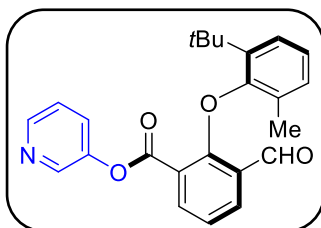

The title compound **3ao** was prepared under the optimized conditions and purified by preparative TLC (hexane : ethyl acetate = 2:1). **3ao** was obtained as a yellow oil (24.5 mg, 63%). **<sup>1</sup>H NMR (500 MHz, Chloroform-*d*)**  $\delta$  9.68 (s, 1H), 8.50 (s, 1H), 8.40 (s, 1H), 8.09 (dd,  $J$  = 7.6, 1.9 Hz, 1H), 8.03 (dd,  $J$  = 7.8, 1.9 Hz, 1H), 7.42 (dt,  $J$  = 8.3, 2.0 Hz, 1H), 7.31 – 7.22 (m, 3H), 7.08 (t,  $J$  = 7.6 Hz, 1H), 7.05 – 6.99 (m, 1H), 1.95 (s, 3H), 1.43 (s, 9H). **<sup>13</sup>C NMR (150 MHz, Chloroform-*d*)**  $\delta$  187.68, 163.74, 155.19, 147.15, 143.31, 137.19, 133.83, 131.18, 129.22, 127.35, 127.29, 126.28, 125.49, 123.96, 122.25, 122.19, 35.36, 30.35, 17.72.

**HRMS (ESI-TOF)** (m/z): Calcd for C<sub>24</sub>H<sub>23</sub>NaNO<sub>4</sub>, ([M + Na]<sup>+</sup>), 412.1519; found 412.1519.

**[ $\alpha$ ]<sub>D</sub><sup>20</sup>** = -23.2 (c = 1.22, CH<sub>2</sub>Cl<sub>2</sub>).

**HPLC analysis:** Daicel Chiralpak IG column (90:10 hexane: 2-propanol, 1 mL/min, 25 °C, 254 nm); t<sub>R</sub> (major) = 11.73 min, t<sub>R</sub> (minor) = 13.04 min, 93% ee.

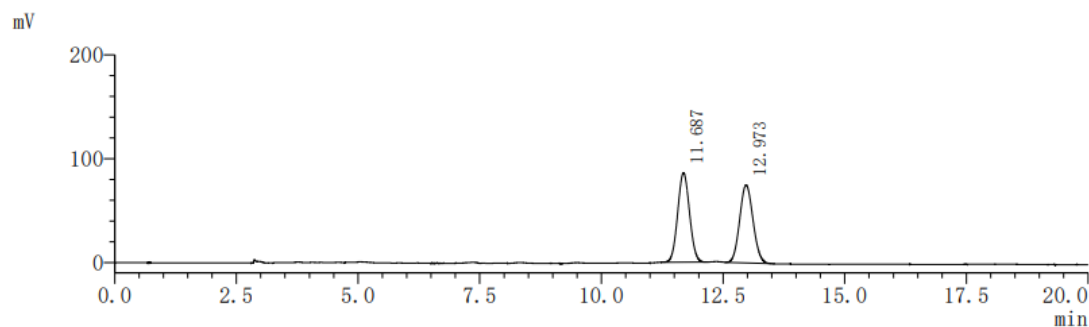

| Peak | PetTime | Type | Width(min) | Area    | Hight | Area%   |
|------|---------|------|------------|---------|-------|---------|
| 1    | 11.687  | M    | 0.4497     | 1456769 | 86012 | 50.4340 |
| 2    | 12.973  | M    | 0.5064     | 1431698 | 75185 | 49.5660 |

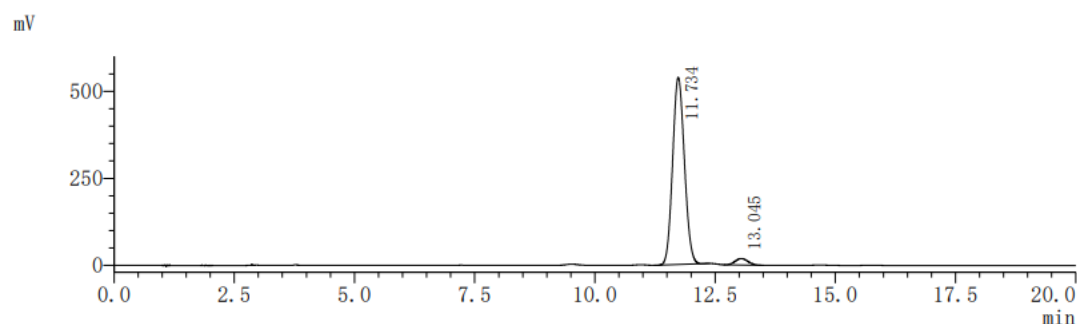

| Peak | PetTime | Type | Width(min) | Area    | Hight  | Area%   |
|------|---------|------|------------|---------|--------|---------|
| 1    | 11.734  | M    | 0.4537     | 9170822 | 536775 | 96.3877 |
| 2    | 13.045  | M    | 0.4968     | 343697  | 18612  | 3.6123  |

**(S)-quinolin-7-yl 2-(2-(tert-butyl)-6-methylphenoxy)-3-formylbenzoate (**3ap**)**

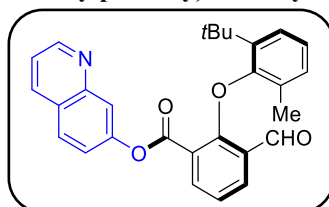

The title compound **3ap** was prepared under the optimized conditions and purified by preparative TLC (hexane : ethyl acetate = 2:1). **3ap** was obtained as a yellow oil (24.1 mg, 55%). **<sup>1</sup>H NMR (500 MHz, Chloroform-*d*)**  $\delta$  9.67 (s, 1H), 8.93 (s, 1H), 8.19 – 8.15 (m, 2H), 8.04 (dd, *J* = 7.9, 1.8 Hz, 1H), 7.85 – 7.83 (m, 2H), 7.43 – 7.41 (m, 1H), 7.32 – 7.26 (m, 6H), 7.12 – 7.05 (m, 2H), 2.01 (s, 3H), 1.45 (s, 9H). **<sup>13</sup>C NMR (150 MHz, Chloroform-*d*)**  $\delta$  187.74, 164.14, 158.05, 155.36, 151.10, 148.69, 140.85, 137.24, 135.87, 133.57, 131.17, 128.92, 127.36, 127.21, 126.42, 126.20, 125.40, 122.81, 122.21, 122.00, 121.02, 120.40, 35.33, 30.34, 17.71.

**HRMS (ESI-TOF)** (*m/z*): Calcd for C<sub>28</sub>H<sub>25</sub>NNaO<sub>4</sub>, ([M + Na]<sup>+</sup>), 462.1676; found 462.1678.

**[ $\alpha$ ]<sub>D</sub><sup>20</sup>** = -28.3 (*c* = 1.20, CH<sub>2</sub>Cl<sub>2</sub>).

**HPLC analysis:** Daicel Chiralpak AD-3 column (90:10 hexane: 2-propanol, 1 mL/min, 25 °C, 254 nm); *t<sub>R</sub>* (minor) = 15.43 min, *t<sub>R</sub>* (major) = 17.31 min, 89% ee.

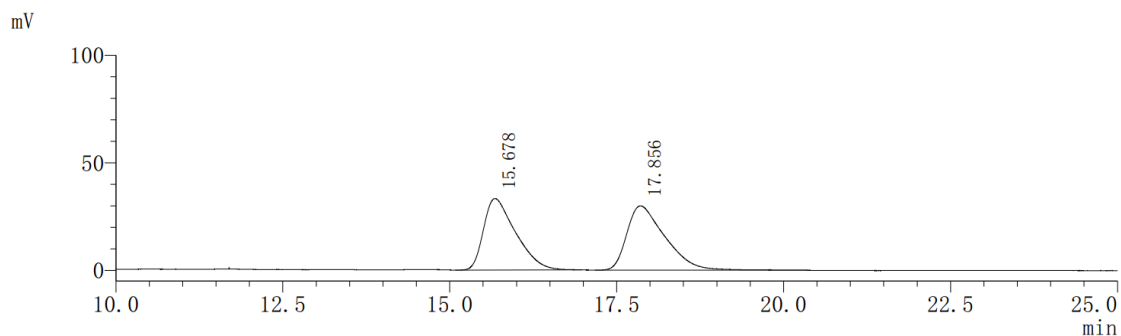

| Peak | PetTime | Type | Width(min) | Area    | Hight | Area%   |
|------|---------|------|------------|---------|-------|---------|
| 1    | 15.678  | M    | 0.9244     | 1109233 | 33253 | 48.2886 |
| 2    | 17.856  | M    | 1.0748     | 1187857 | 29908 | 51.7114 |

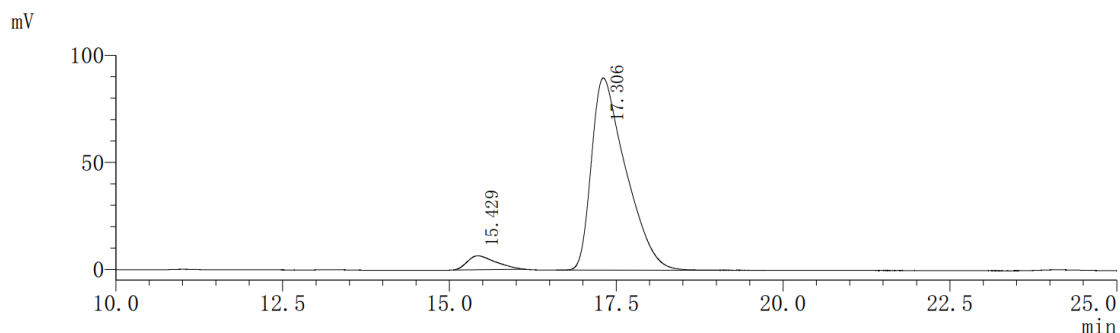

| Peak | PetTime | Type | Width(min) | Area    | Hight | Area%   |
|------|---------|------|------------|---------|-------|---------|
| 1    | 15.429  | M    | 0.8295     | 193000  | 6502  | 5.6625  |
| 2    | 17.306  | M    | 1.0088     | 3215384 | 89794 | 94.3375 |

**(S)-benzo[b]thiophen-5-yl 2-(2-(tert-butyl)-6-methylphenoxy)-3-formylbenzoate (3aq)**

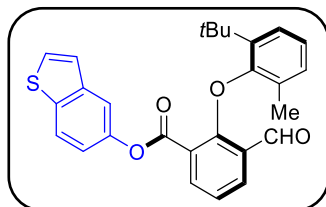

The title compound **3aq** was prepared under the optimized conditions and purified by preparative TLC (hexane : ethyl acetate = 10:1). **3aq** was obtained as a yellow oil (35.1 mg, 79%). **<sup>1</sup>H NMR (500 MHz, Chloroform-*d*)**  $\delta$  9.68 (s, 1H), 8.12 (dd,  $J$  = 7.6, 1.8 Hz, 1H), 8.02 (dd,  $J$  = 7.8, 1.8 Hz, 1H), 7.84 (d,  $J$  = 8.7 Hz, 1H), 7.51 – 7.50 (m, 2H), 7.31 – 7.29 (m, 2H), 7.28 – 7.24 (m, 1H), 7.10 (t,  $J$  = 7.6 Hz, 1H), 7.05 (dd,  $J$  = 8.5, 2.0 Hz, 2H), 1.99 (s, 3H), 1.45 (s, 9H). **<sup>13</sup>C NMR (150 MHz, Chloroform-*d*)**  $\delta$  187.80, 164.68, 157.92, 155.41, 147.84, 140.91, 140.27, 137.25, 137.10, 133.31, 131.17, 128.25, 127.43, 127.22, 126.19, 125.30, 123.72, 123.29, 123.11, 122.19, 118.44, 115.87, 35.36, 30.36, 17.73.

**HRMS** (ESI-TOF) ( $m/z$ ): Calcd for  $C_{27}H_{24}NaO_4S$ , ( $[M + Na]^+$ ), 467.1288; found 467.1287.

**$[\alpha]_D^{20}$**  = -27.7 ( $c$  = 1.75,  $CH_2Cl_2$ ).

**HPLC analysis:** Daicel Chiralpak IG column (99:1 hexane: 2-propanol, 1 mL/min, 25 °C, 254 nm);  $t_R$  (major) = 23.13 min,  $t_R$  (minor) = 25.50 min, 93% ee.

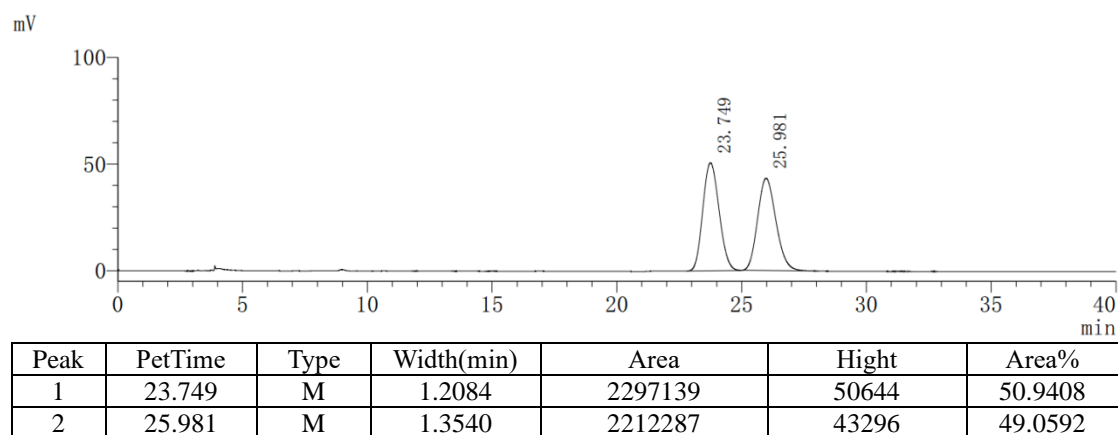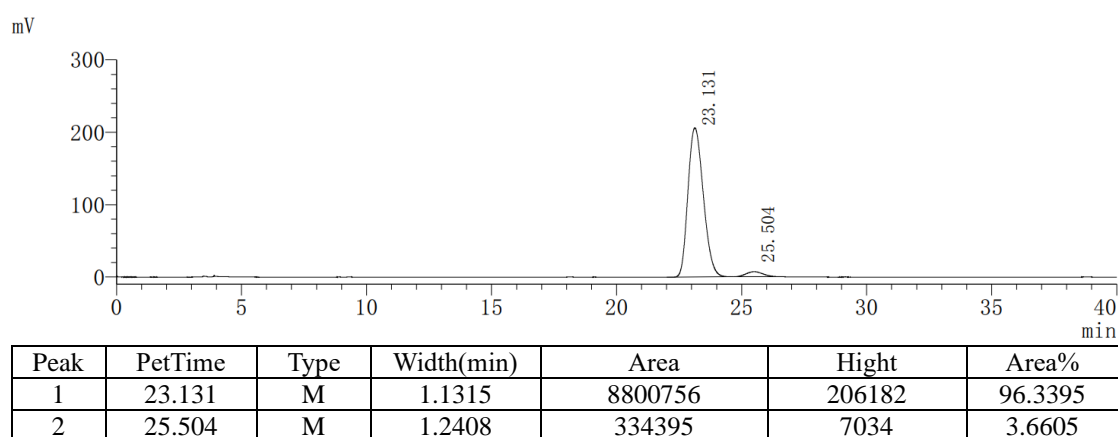

**(S)-benzofuran-5-yl 2-(2-(tert-butyl)-6-methylphenoxy)-3-formylbenzoate (3ar)**

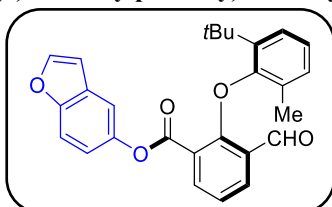

The title compound **3ar** was prepared under the optimized conditions and purified by preparative TLC (hexane : ethyl acetate = 10:1). **3ar** was obtained as a yellow oil (33.4 mg, 78%). **<sup>1</sup>H NMR (500 MHz, Chloroform-*d*)**  $\delta$  9.66 (s, 1H), 8.11 (dd, *J* = 7.6, 1.8 Hz, 1H), 8.02 (dd, *J* = 7.8, 1.8 Hz, 1H), 7.65 (d, *J* = 2.1 Hz, 1H), 7.47 (d, *J* = 8.8 Hz, 1H), 7.31 – 7.29 (m, 2H), 7.27 – 7.24 (m, 2H), 7.09 (t, *J* = 7.6 Hz, 1H), 7.05 (d, *J* = 7.4 Hz, 1H), 6.98 (dd, *J* = 8.8, 2.3 Hz, 1H), 6.75 (d, *J* = 1.5 Hz, 1H), 1.99 (s, 3H), 1.45 (s, 9H). **<sup>13</sup>C NMR (150 MHz, Chloroform-*d*)**  $\delta$  187.81, 164.89, 157.89, 155.44, 152.64, 146.32, 146.16, 140.88, 137.07, 133.25, 131.16, 128.06, 127.43, 127.20, 126.17, 125.29, 123.40, 122.17, 117.95, 113.65, 111.81, 106.84, 35.35, 30.35, 17.71.

**HRMS (ESI-TOF) (m/z):** Calcd for C<sub>27</sub>H<sub>24</sub>NaO<sub>5</sub>, ([M + Na]<sup>+</sup>), 451.1516; found 451.1511.

**[ $\alpha$ ]<sub>D</sub><sup>20</sup>** = -25.5 (*c* = 1.66, CH<sub>2</sub>Cl<sub>2</sub>).

**HPLC analysis:** Daicel Chiralpak IG column (99:1 hexane: 2-propanol, 1 mL/min, 25 °C, 254 nm); *t<sub>R</sub>* (major) = 17.63 min, *t<sub>R</sub>* (minor) = 19.76 min, 98% ee.

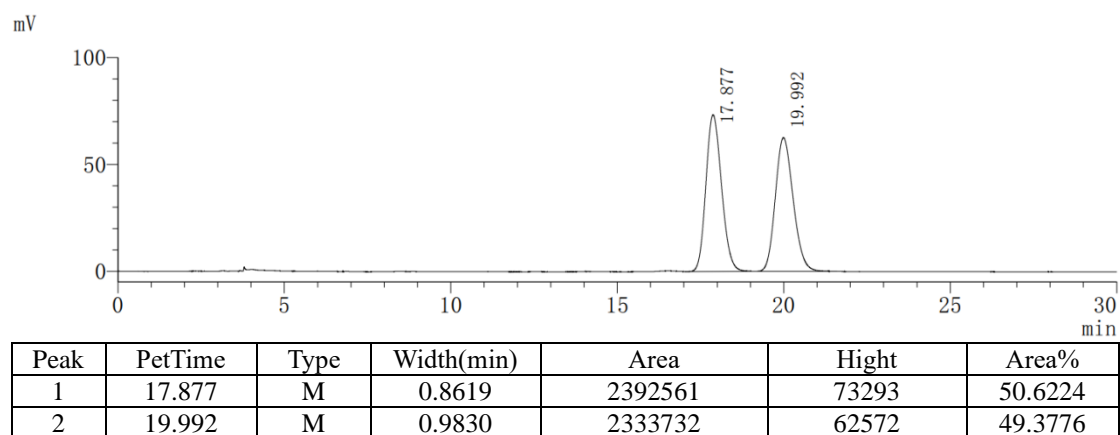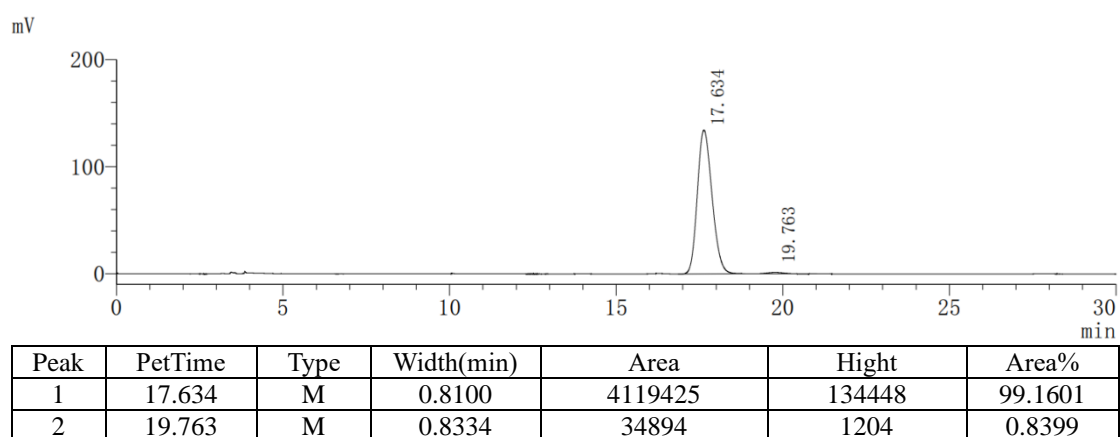

**(S)-1-methyl-1H-indol-5-yl 2-(2-(tert-butyl)-6-methylphenoxy)-3-formylbenzoate (3as)**

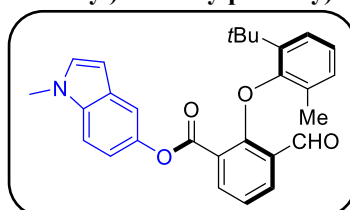

The title compound **3as** was prepared under the optimized conditions and purified by preparative TLC (hexane : ethyl acetate = 5:1). **3as** was obtained as a yellow oil (21.2 mg, 48%). **<sup>1</sup>H NMR (500 MHz, Chloroform-*d*)**  $\delta$  9.66 (s, 1H), 8.11 (dd,  $J$  = 7.6, 1.8 Hz, 1H), 8.00 (dd,  $J$  = 7.8, 1.8 Hz, 1H), 7.31 – 7.28 (m, 2H), 7.27 – 7.23 (m, 2H), 7.10 – 7.04 (m, 3H), 6.91 (dd,  $J$  = 8.8, 2.2 Hz, 1H), 6.45 (d,  $J$  = 3.0 Hz, 1H), 3.79 (s, 3H), 2.00 (s, 3H), 1.46 (s, 9H). **<sup>13</sup>C NMR (150 MHz, Chloroform-*d*)**  $\delta$  187.94, 165.32, 157.81, 155.52, 144.07, 140.86, 137.04, 134.73, 132.90, 131.14, 130.05, 128.57, 127.48, 127.12, 126.10, 125.20, 124.00, 122.13, 115.46, 112.80, 109.51, 101.21, 35.34, 33.02, 30.36, 17.73.

**HRMS** (ESI-TOF) ( $m/z$ ): Calcd for  $C_{28}H_{27}NNaO_4$ , ( $[M + Na]^+$ ), 464.1832; found 464.1828.

**$[\alpha]_D^{20}$**  = -24.8 ( $c$  = 1.05,  $CH_2Cl_2$ ).

**HPLC analysis:** Daicel Chiralpak IC column (97:3 hexane: 2-propanol, 1 mL/min, 25 °C, 254 nm);  $t_R$  (major) = 26.77 min,  $t_R$  (minor) = 34.77 min, 99% ee.

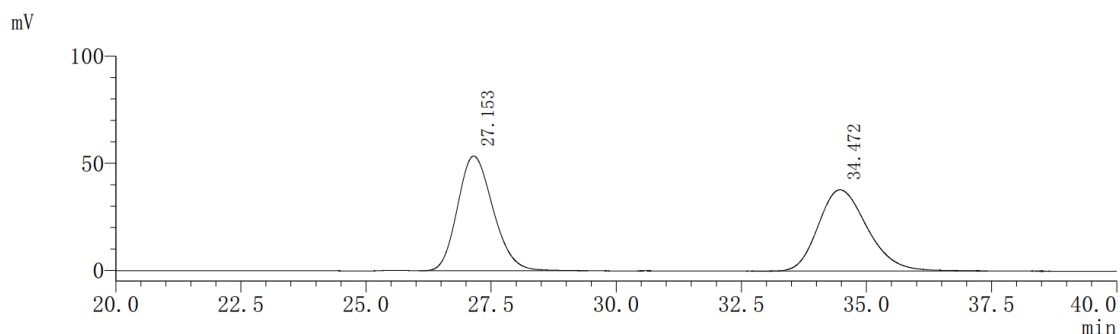

| Peak | PetTime | Type | Width(min) | Area    | Hight | Area%   |
|------|---------|------|------------|---------|-------|---------|
| 1    | 27.153  | M    | 1.2929     | 2644181 | 53529 | 50.5420 |
| 2    | 34.472  | M    | 1.7763     | 2587471 | 37937 | 49.4580 |

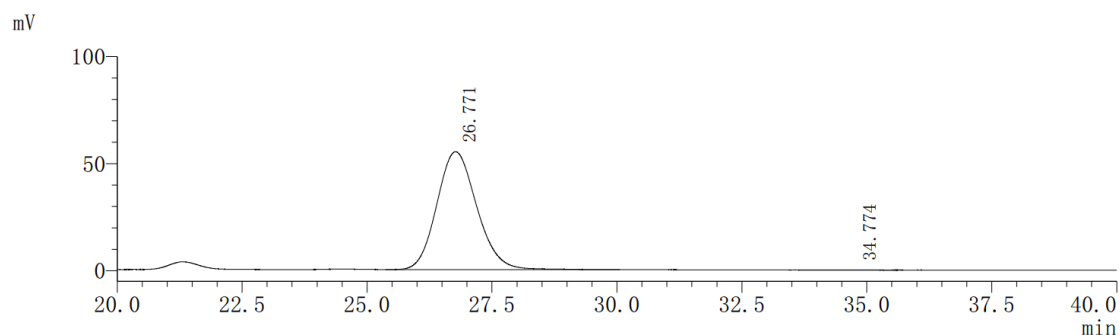

| Peak | PetTime | Type | Width(min) | Area    | Hight | Area%   |
|------|---------|------|------------|---------|-------|---------|
| 1    | 26.771  | M    | 1.4540     | 3063460 | 55076 | 99.5989 |
| 2    | 34.774  | M    | 1.2959     | 12337   | 143   | 0.4011  |

#### 4-acetamidophenyl 2-(2-(tert-butyl)-6-methylphenoxy)-3-formylbenzoate (**3at**)

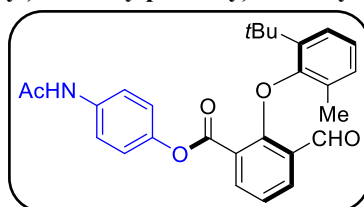

The title compound **3at** was prepared under the optimized conditions and purified by preparative TLC (hexane : ethyl acetate = 2:1). **3at** was obtained as a yellow oil (37.8 mg, 85%). **<sup>1</sup>H NMR (500 MHz, Chloroform-*d*)**  $\delta$  9.66 (s, 1H), 8.07 (dd,  $J$  = 7.6, 2.0 Hz, 1H), 8.01 (dd,  $J$  = 7.8, 1.9 Hz, 1H), 7.57 (s, 1H), 7.49 – 7.46 (m, 2H), 7.29 (dd,  $J$  = 7.8, 1.8 Hz, 1H), 7.24 (t,  $J$  = 7.7 Hz, 1H), 7.08 (t,  $J$  = 7.6 Hz, 1H), 7.03 (dd,  $J$  = 7.7, 1.7 Hz, 1H), 7.00 – 6.97 (m, 2H), 2.13 (s, 3H), 1.96 (s, 3H), 1.43 (s, 9H). **<sup>13</sup>C NMR (150 MHz, Chloroform-*d*)**  $\delta$  187.79, 168.33, 164.51, 157.88, 155.30, 146.55, 140.79, 137.06, 135.85, 133.32, 131.12, 127.31, 127.13, 126.15, 125.31, 123.04, 122.16, 121.83, 120.75, 35.30, 30.31, 24.41, 17.67.

**HRMS (ESI-TOF) (m/z):** Calcd for  $C_{27}H_{27}NNaO_5$ ,  $[(M + Na)^+]$ , 468.1781; found 468.1780.

**$[\alpha]_D^{20}$**  = -22.6 ( $c$  = 1.89,  $CH_2Cl_2$ ).

**HPLC analysis:** Daicel Chiralpak IG column (90:10 hexane: 2-propanol, 1 mL/min, 25 °C, 254 nm);  $t_R$  (major) = 19.25 min,  $t_R$  (minor) = 22.18 min, 90% ee.

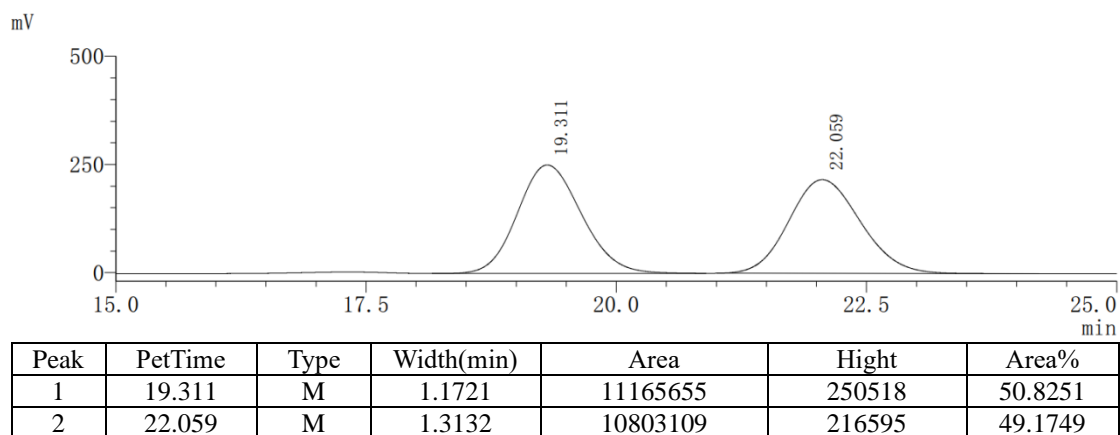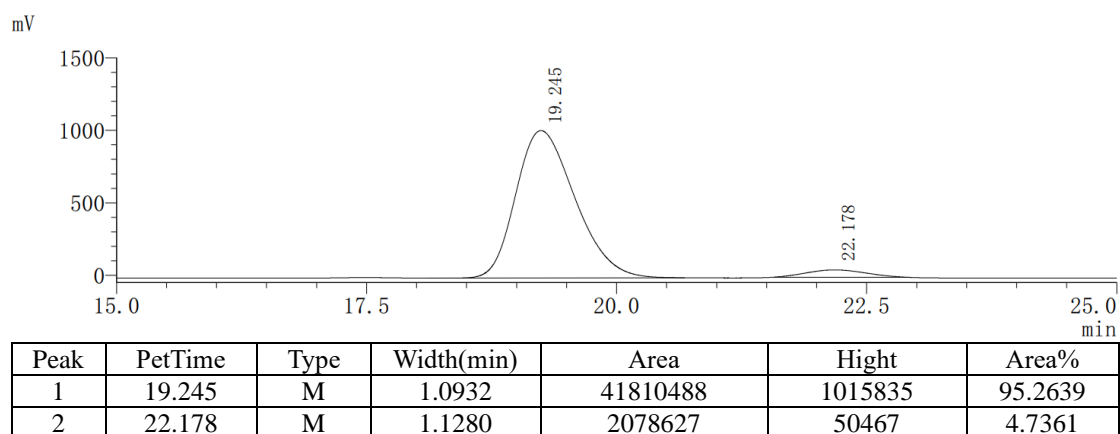

**(S)-2-isopropyl-5-methylphenyl 2-(2-(tert-butyl)-6-methylphenoxy)-3-formylbenzoate (3au)**

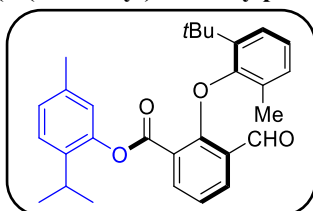

The title compound **3au** was prepared under the optimized conditions and purified by preparative TLC (hexane : DCM = 1:1). **3au** was obtained as a yellow oil (27.1 mg, 61%). **<sup>1</sup>H NMR (600 MHz, Chloroform-*d*)**  $\delta$  9.55 (s, 1H), 8.12 (dd,  $J$  = 7.6, 1.9 Hz, 1H), 8.00 (dd,  $J$  = 7.8, 1.9 Hz, 1H), 7.31 (dd,  $J$  = 7.9, 1.7 Hz, 1H), 7.25 (t,  $J$  = 7.7 Hz, 1H), 7.21 (d,  $J$  = 7.9 Hz, 1H), 7.09 (t,  $J$  = 7.6 Hz, 1H), 7.04 (dd,  $J$  = 7.7, 1.7 Hz, 2H), 6.75 (d,  $J$  = 1.7 Hz, 1H), 3.11 – 3.03 (m, 1H), 2.30 (s, 3H), 1.97 (s, 3H), 1.45 (s, 9H), 1.17 (t,  $J$  = 7.5 Hz, 6H). **<sup>13</sup>C NMR (150 MHz, Chloroform-*d*)**  $\delta$  187.74, 164.49, 158.01, 155.65, 147.75, 140.77, 137.01, 136.92, 136.63, 133.32, 131.19, 127.34, 127.24, 126.41, 126.16, 125.29, 123.53, 122.69, 122.19, 35.31, 30.31, 27.05, 23.12, 23.05, 20.80, 17.64.

**HRMS (ESI-TOF) (m/z):** Calcd for C<sub>29</sub>H<sub>32</sub>NaO<sub>4</sub>, ([M + Na]<sup>+</sup>), 467.2193; found 467.2184.

**$[\alpha]_D^{20}$**  = -24.2 (c = 1.36, CH<sub>2</sub>Cl<sub>2</sub>).

**HPLC analysis:** Daicel Chiralpak AD-3 column (98:2 hexane: 2-propanol, 1 mL/min, 25 °C, 254 nm);  $t_R$  (minor) = 5.44 min,  $t_R$  (major) = 7.09 min, 99% ee.

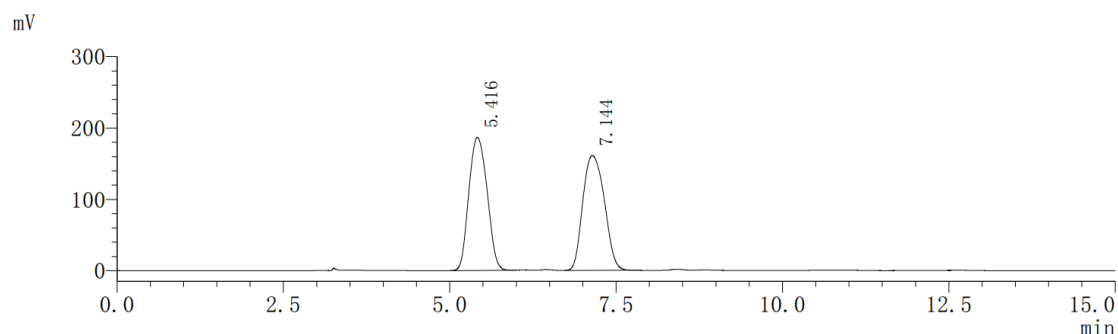

| Peak | PetTime | Type | Width(min) | Area    | Hight  | Area%   |
|------|---------|------|------------|---------|--------|---------|
| 1    | 5.416   | M    | 0.5094     | 3562017 | 186519 | 49.5181 |
| 2    | 7.144   | M    | 0.5881     | 3631347 | 160817 | 50.4819 |

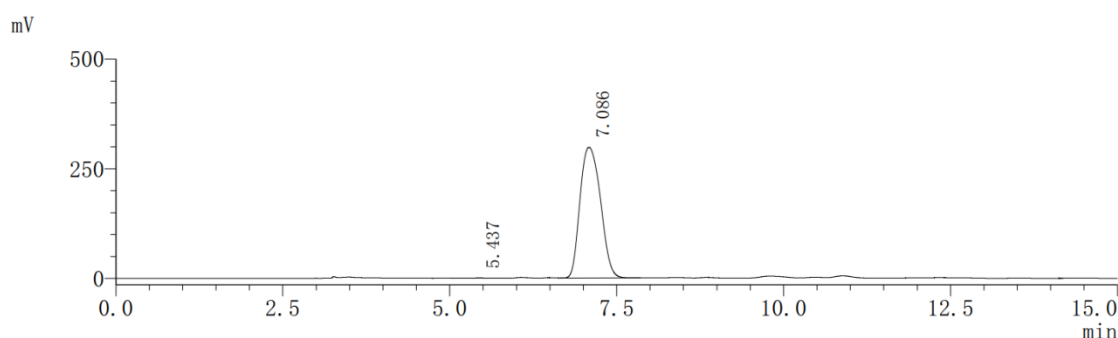

| Peak | PetTime | Type | Width(min) | Area    | Hight  | Area%   |
|------|---------|------|------------|---------|--------|---------|
| 1    | 5.437   | M    | 0.2767     | 13619   | 632    | 0.2140  |
| 2    | 7.086   | M    | 0.5517     | 6349687 | 298044 | 99.7860 |

**(S)-benzo[d][1,3]dioxol-5-yl 2-(2-(tert-butyl)-6-methylphenoxy)-3-formylbenzoate (3av)**

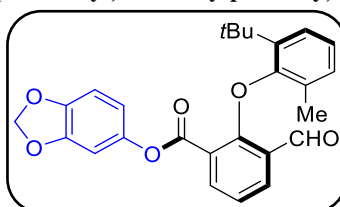

The title compound **3av** was prepared under the optimized conditions and purified by preparative TLC (hexane : ethyl acetate = 10:1). **3av** was obtained as a yellow oil (30.2 mg, 70%). **<sup>1</sup>H NMR (600 MHz, Chloroform-*d*)**  $\delta$  9.67 (s, 1H), 8.05 (dd, *J* = 7.6, 1.9 Hz, 1H), 8.00 (dd, *J* = 7.8, 1.9 Hz, 1H), 7.30 (dd, *J* = 7.7, 1.7 Hz, 1H), 7.23 (t, *J* = 7.7 Hz, 1H), 7.09 (t, *J* = 7.6 Hz, 1H), 7.04 (d, *J* = 7.1 Hz, 1H), 6.76 (d, *J* = 8.4 Hz, 1H), 6.55 (d, *J* = 2.3 Hz, 1H), 6.51 (dd, *J* = 8.4, 2.4 Hz, 1H), 5.98 (s, 2H), 1.96 (s, 3H), 1.44 (s, 9H). **<sup>13</sup>C NMR (150 MHz, Chloroform-*d*)**  $\delta$  187.79, 164.64, 157.83, 155.32, 147.97, 145.50, 144.79, 140.86, 137.04, 133.26, 131.12, 127.37, 127.14, 126.17, 125.30, 123.11, 122.14, 113.85, 107.93, 103.68, 101.72, 35.33, 30.33, 17.68.

**HRMS (ESI-TOF) (m/z):** Calcd for C<sub>26</sub>H<sub>24</sub>NaO<sub>6</sub>, ([M + Na]<sup>+</sup>), 455.1465; found 455.1462.

**[ $\alpha$ ]<sub>D</sub><sup>20</sup>** = -16.5 (*c* = 1.51, CH<sub>2</sub>Cl<sub>2</sub>).

**HPLC analysis:** Daicel Chiralpak AD-3 column (97:3 hexane: 2-propanol, 1 mL/min, 25 °C, 254 nm); *t<sub>R</sub>* (minor) = 9.20 min, *t<sub>R</sub>* (major) = 9.70 min, 84% ee.

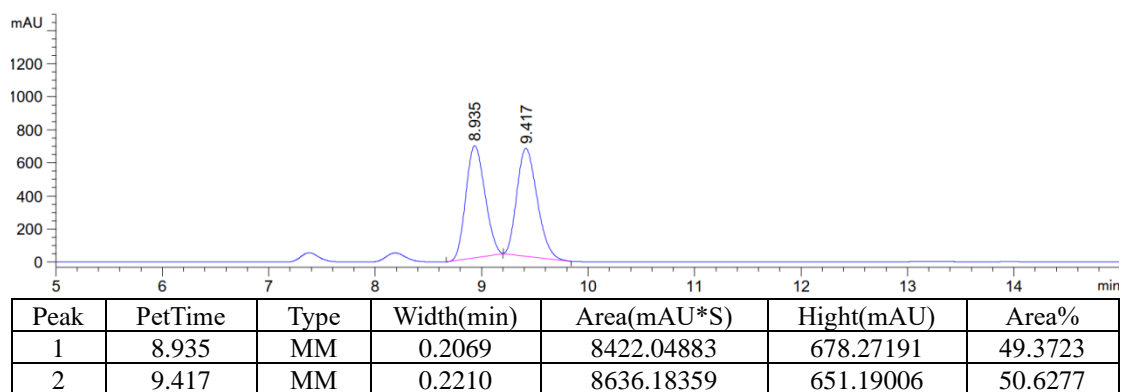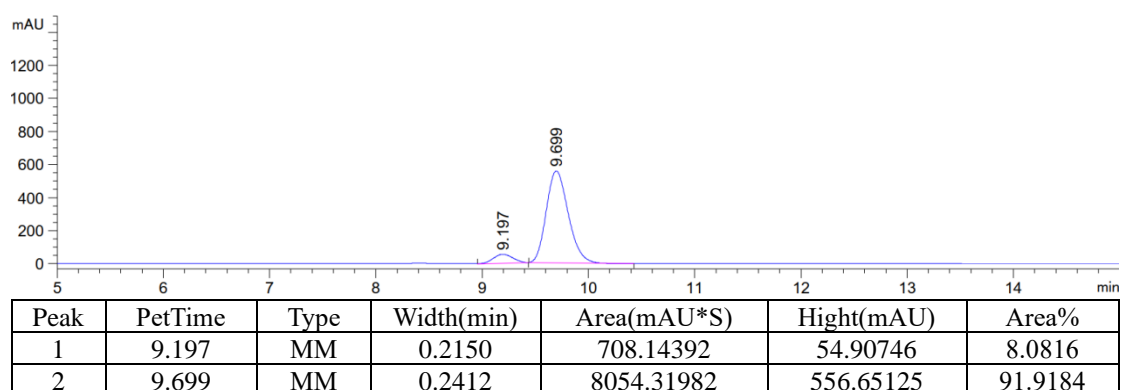

**(S)-2-(methoxycarbonyl)phenyl 2-(2-(tert-butyl)-6-methylphenoxy)-3-formylbenzoate (**3aw**)**

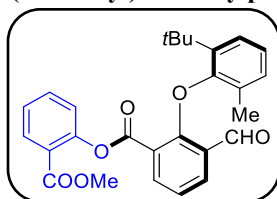

The title compound **3aw** was prepared under the optimized conditions and purified by preparative TLC (hexane : ethyl acetate = 10:1). **3aw** was obtained as a yellow oil (20.1 mg, 45%). **<sup>1</sup>H NMR (500 MHz, Chloroform-*d*)**  $\delta$  9.56 (s, 1H), 8.37 (dd, *J* = 7.6, 1.9 Hz, 1H), 8.04 (dd, *J* = 7.9, 1.6 Hz, 1H), 8.00 (dd, *J* = 7.9, 1.9 Hz, 1H), 7.55 (td, *J* = 7.8, 1.7 Hz, 1H), 7.33 (td, *J* = 7.6, 1.2 Hz, 1H), 7.28 (td, *J* = 7.2, 1.3 Hz, 2H), 7.10 – 7.01 (m, 3H), 3.82 (s, 3H), 1.97 (s, 3H), 1.45 (s, 9H). **<sup>13</sup>C NMR (150 MHz, Chloroform-*d*)**  $\delta$  187.78, 164.81, 163.75, 158.27, 155.85, 150.47, 140.70, 137.73, 133.87, 133.42, 131.84, 131.20, 127.37, 127.18, 126.23, 126.08, 125.19, 123.98, 123.29, 123.09, 122.29, 52.20, 35.33, 30.31, 17.66.

**HRMS (ESI-TOF)** (*m/z*): Calcd for C<sub>27</sub>H<sub>26</sub>NaO<sub>6</sub>, ([*M* + Na]<sup>+</sup>), 469.1622, found 469.1614.

**[ $\alpha$ ]<sub>D</sub><sup>19</sup>** = -20.9 (*c* = 1.00, CH<sub>2</sub>Cl<sub>2</sub>).

**HPLC analysis:** Daicel Chiralpak AD-3 column (99:1 hexane: 2-propanol, 1 mL/min, 25 °C, 254 nm); *t<sub>R</sub>* (minor) = 23.96 min, *t<sub>R</sub>* (major) = 27.94 min, 88% ee.

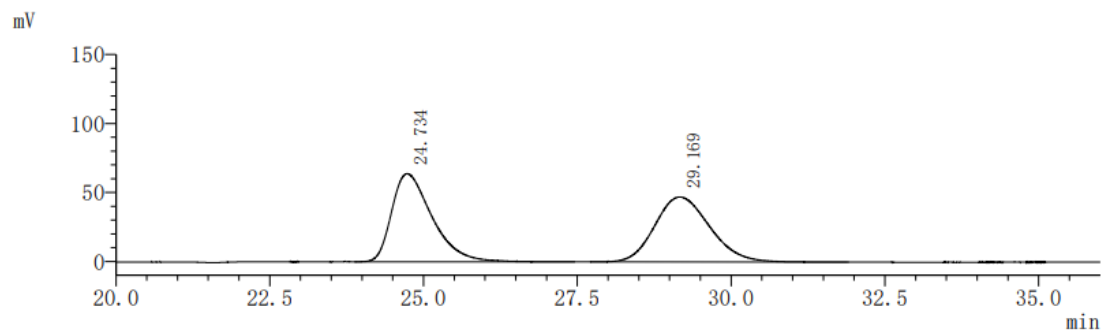

| Peak | PetTime | Type | Width(min) | Area    | Hight | Area%   |
|------|---------|------|------------|---------|-------|---------|
| 1    | 24.734  | M    | 1.1855     | 2919821 | 63855 | 49.9176 |
| 2    | 29.169  | M    | 1.6242     | 2929460 | 47089 | 50.0824 |

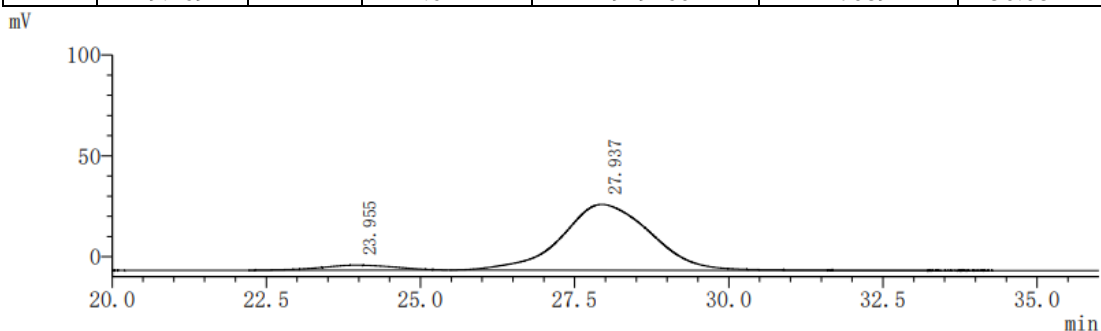

| Peak | PetTime | Type | Width(min) | Area    | Hight | Area%   |
|------|---------|------|------------|---------|-------|---------|
| 1    | 23.955  | M    | 2.0100     | 205673  | 2469  | 5.8817  |
| 2    | 27.937  | M    | 2.5759     | 3291127 | 32613 | 94.1183 |

**(S)-4-propionylphenyl 2-(2-(tert-butyl)-6-methylphenoxy)-3-formylbenzoate (**3ax**)**

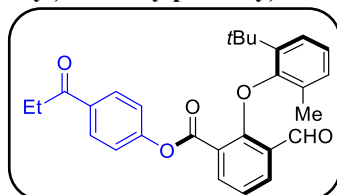

The title compound **3ax** was prepared under the optimized conditions and purified by preparative TLC (hexane : ethyl acetate = 10:1). **3ax** was obtained as a yellow oil (27.1 mg, 61%). **<sup>1</sup>H NMR (500 MHz, Chloroform-*d*)**  $\delta$  9.67 (s, 1H), 8.09 (dd, *J* = 7.6, 1.9 Hz, 1H), 8.05 – 8.02 (m, 1H), 8.00 (d, *J* = 8.7 Hz, 2H), 7.30 (dd, *J* = 7.8, 1.8 Hz, 1H), 7.28 – 7.24 (m, 1H), 7.18 – 7.14 (m, 2H), 7.09 (t, *J* = 7.6 Hz, 1H), 7.04 (dd, *J* = 7.5, 1.8 Hz, 1H), 3.03 – 2.96 (m, 2H), 1.97 (s, 3H), 1.44 (s, 9H), 1.23 (t, *J* = 7.2 Hz, 3H). **<sup>13</sup>C NMR (150 MHz, Chloroform-*d*)**  $\delta$  199.50, 187.68, 163.74, 158.02, 155.30, 154.00, 140.89, 137.16, 134.73, 133.68, 131.18, 129.60, 127.35, 127.27, 126.25, 125.43, 122.60, 122.23, 121.69, 35.35, 31.80, 30.35, 17.71, 8.21.

**HRMS (ESI-TOF) (m/z):** Calcd for C<sub>28</sub>H<sub>28</sub>NaO<sub>5</sub>, ([M + Na]<sup>+</sup>), 467.1829, found 467.1831.

**[ $\alpha$ ]<sub>D</sub><sup>19</sup>** = -28.4 (c = 1.36, CH<sub>2</sub>Cl<sub>2</sub>).

**HPLC analysis:** Daicel Chiralpak IG column (95:5 hexane: 2-propanol, 1 mL/min, 25 °C, 256 nm); t<sub>R</sub> (major) = 20.12 min, t<sub>R</sub> (minor) = 21.65 min, 90% ee.

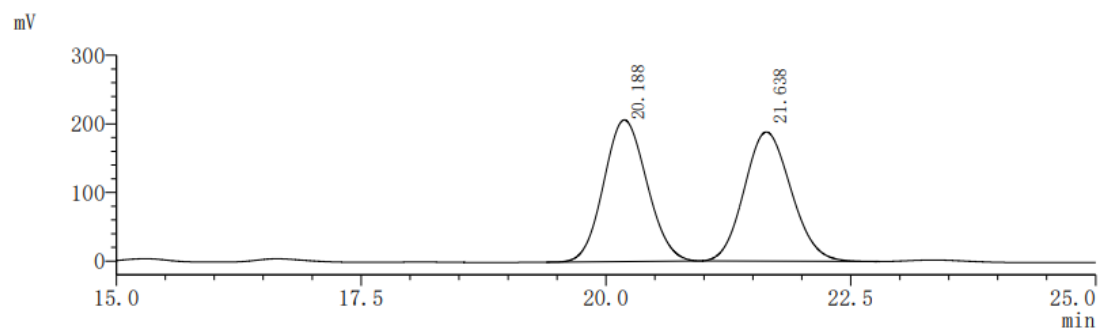

| Peak | PetTime | Type | Width(min) | Area    | Hight  | Area%   |
|------|---------|------|------------|---------|--------|---------|
| 1    | 20.188  | M    | 0.8165     | 6326184 | 206277 | 50.2419 |
| 2    | 21.638  | M    | 0.8831     | 6265256 | 188224 | 49.7581 |

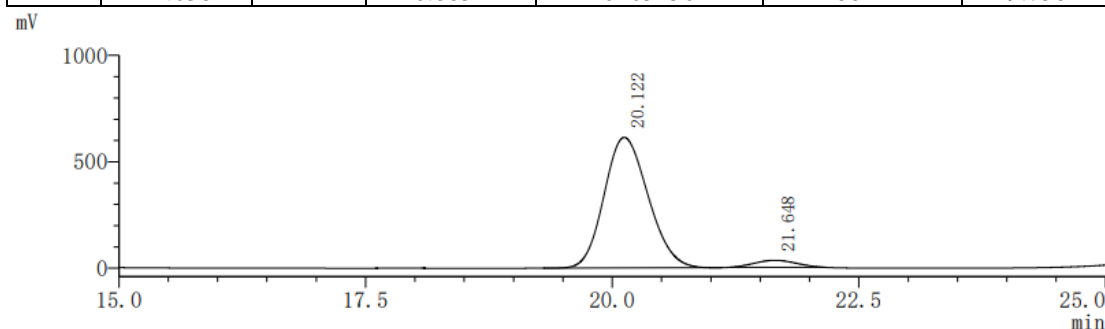

| Peak | PetTime | Type | Width(min) | Area     | Hight  | Area%   |
|------|---------|------|------------|----------|--------|---------|
| 1    | 20.122  | M    | 0.8248     | 19049935 | 613563 | 95.2188 |
| 2    | 21.648  | M    | 0.8048     | 956543   | 32688  | 4.7812  |

#### 5,7-dichloroquinolin-8-yl-6-formyl-[1,1':2',1''-terphenyl]-2-carboxylate (**3ay**)

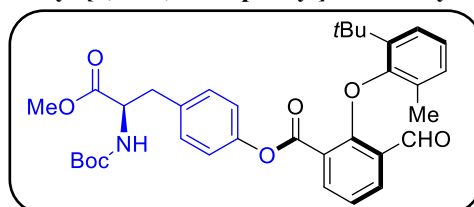

The title compound **3ay** was prepared under the optimized conditions and purified by preparative TLC (hexane : ethyl acetate = 2:1). **3ay** was obtained as a light yellow oil (31.3 mg, 66%, dr: > 20:1). **<sup>1</sup>H NMR (500 MHz, Chloroform-*d*)**  $\delta$  9.64 (s, 1H), 8.07 (dd,  $J$  = 7.6, 1.9 Hz, 1H), 8.01 (dd,  $J$  = 7.8, 1.9 Hz, 1H), 7.29 (dd,  $J$  = 7.9, 1.7 Hz, 1H), 7.24 (t,  $J$  = 7.7 Hz, 1H), 7.14 (d,  $J$  = 8.1 Hz, 2H), 7.08 (t,  $J$  = 7.6 Hz, 1H), 7.04 – 7.00 (m, 3H), 4.99 (d,  $J$  = 8.3 Hz, 1H), 4.60 – 4.56 (m, 1H), 3.71 (s, 3H), 3.14 – 3.02 (m, 2H), 1.96 (s, 3H), 1.44 (s, 9H), 1.42 (s, 9H). **<sup>13</sup>C NMR (150 MHz, Chloroform-*d*)**  $\delta$  187.72, 172.15, 164.24, 157.85, 155.37, 155.02, 149.57, 140.78, 137.02, 133.89, 133.28, 131.13, 130.25, 127.36, 127.14, 126.12, 125.28, 123.18, 122.14, 121.51, 79.99, 54.32, 52.24, 37.71, 35.30, 30.31, 28.27, 17.66.

**HRMS (ESI-TOF) (m/z):** Calcd for  $C_{34}H_{39}NNaO_8$ ,  $([M + Na]^+)$ , 612.2568; found 612.2570.

$[\alpha]_D^{20}$  = -20.3 ( $c$  = 1.94,  $CH_2Cl_2$ ).

#### (8*S*,9*R*,13*R*,14*R*)-13-methyl-17-oxo-7,8,9,11,12,13,14,15,16,17-decahydro-6H-cyclopenta[*a*]phenanthren-3-yl 2-(2-(tert-butyl)-6-methylphenoxy)-3-formylbenzoate (**3az**)

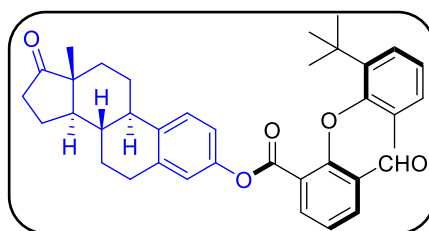

The title compound **3az** was prepared under the optimized conditions and purified by preparative TLC (hexane : ethyl acetate = 2:1). **3az** was obtained as a yellow oil (34.4 mg, 61%, dr > 20:1). **<sup>1</sup>H NMR (500 MHz, Chloroform-*d*)**  $\delta$  9.64 (s, 1H), 8.06 (dd, *J* = 7.6, 1.8 Hz, 1H), 7.99 (dd, *J* = 7.9, 1.8 Hz, 1H), 7.28 (t, *J* = 8.0 Hz, 2H), 7.23 (t, *J* = 7.7 Hz, 1H), 7.08 (t, *J* = 7.6 Hz, 1H), 7.03 (d, *J* = 7.4 Hz, 1H), 6.83 (dd, *J* = 8.6, 2.4 Hz, 1H), 6.78 (d, *J* = 2.4 Hz, 1H), 2.91 – 2.88 (m, 2H), 2.53 – 2.47 (m, 1H), 2.41 – 2.38 (m, 1H), 2.31 – 2.25 (m, 1H), 2.18 – 2.10 (m, 1H), 2.08 – 1.94 (m, 6H), 1.65 – 1.48 (m, 6H), 1.44 (s, 9H), 0.90 (s, 3H). **<sup>13</sup>C NMR (150 MHz, Chloroform-*d*)**  $\delta$  220.63, 187.77, 164.65, 157.81, 155.42, 148.42, 140.79, 138.03, 137.61, 137.03, 133.17, 131.13, 127.40, 127.13, 126.39, 126.10, 125.23, 123.39, 122.13, 121.49, 118.64, 50.41, 47.91, 44.14, 37.98, 35.82, 35.31, 31.53, 30.33, 29.37, 26.30, 25.73, 21.57, 17.69, 13.80.

**HRMS (ESI-TOF) (m/z):** Calcd for C<sub>37</sub>H<sub>40</sub>NaO<sub>5</sub>, ([M + Na]<sup>+</sup>), 587.2768; found 587.2768.

[ $\alpha$ ]<sub>D</sub><sup>20</sup> = +15.686 (*c* = 1.72, CH<sub>2</sub>Cl<sub>2</sub>).

**(8*S*,9*R*,13*R*,14*R*,17*R*)-17-hydroxy-13-methyl-7,8,9,11,12,13,14,15,16,17-decahydro-6*H*-cyclopenta[*a*]phenanthren-3-yl 2-(2-(tert-butyl)-6-methylphenoxy)-3-formylbenzoate (**3aa'**)**

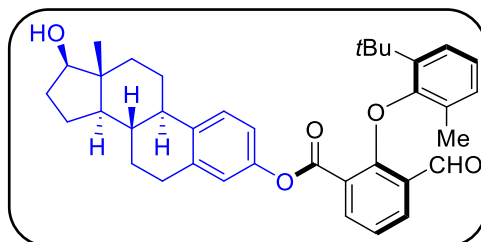

The title compound **3aa'** was prepared under the optimized conditions and purified by preparative TLC (hexane : ethyl acetate = 2:1). **3aa'** was obtained as a yellow oil (37.4 mg, 66%, dr > 20:1). **<sup>1</sup>H NMR (500 MHz, Chloroform-*d*)**  $\delta$  9.64 (s, 1H), 8.06 (dd, *J* = 7.6, 1.9 Hz, 1H), 7.99 (dd, *J* = 7.8, 1.9 Hz, 1H), 7.30 – 7.27 (m, 2H), 7.23 (t, *J* = 7.6 Hz, 1H), 7.08 (t, *J* = 7.6 Hz, 1H), 7.03 (dd, *J* = 7.6, 1.7 Hz, 1H), 6.82 (dd, *J* = 8.5, 2.5 Hz, 1H), 6.76 (d, *J* = 2.5 Hz, 1H), 3.73 (t, *J* = 8.5 Hz, 1H), 2.86 – 2.83 (m, 2H), 2.34 – 2.29 (m, 1H), 2.24 – 2.19 (m, 1H), 2.17 – 2.08 (m, 1H), 1.96 (s, 3H), 1.90 – 1.85 (m, 1H), 1.73 – 1.67 (m, 1H), 1.59 – 1.55 (m, 1H), 1.55 – 1.47 (m, 2H), 1.44 (s, 9H), 1.41 (s, 1H), 1.38 – 1.25 (m, 4H), 1.22 – 1.16 (m, 1H), 0.77 (s, 3H). **<sup>13</sup>C NMR (150 MHz, Chloroform-*d*)**  $\delta$  187.87, 164.74, 157.84, 155.46, 148.29, 140.82, 138.31, 138.25, 137.08, 133.15, 131.17, 127.44, 127.14, 126.41, 126.13, 125.26, 123.51, 122.15, 121.44, 118.48, 81.87, 50.08, 44.15, 43.22, 38.47, 36.68, 35.34, 30.60, 30.35, 29.53, 27.02, 26.15, 23.13, 17.72, 11.03.

**HRMS (ESI-TOF) (m/z):** Calcd for C<sub>37</sub>H<sub>42</sub>NaO<sub>5</sub>, ([M + Na]<sup>+</sup>), 589.2924; found 589.2925.

[ $\alpha$ ]<sub>D</sub><sup>20</sup> = +12.3 (*c* = 1.86, CH<sub>2</sub>Cl<sub>2</sub>).

**(8*S*,9*R*,13*R*,14*R*,17*S*)-17-ethynyl-17-hydroxy-13-methyl-7,8,9,11,12,13,14,15,16,17-decahydro-6*H*-cyclopenta[*a*]phenanthren-3-yl 2-(2-(tert-butyl)-6-methylphenoxy)-3-formylbenzoate (**3ab'**)**

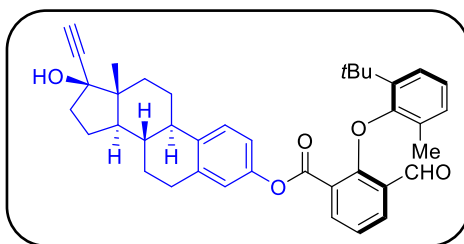

The title compound **3ab'** was prepared under the optimized conditions and purified by preparative TLC (hexane : ethyl acetate = 5:1). **3ab'** was obtained as a yellow oil (46.0 mg, 78%, dr > 20:1). <sup>1</sup>H NMR (500 MHz, Chloroform-*d*) δ 9.65 (s, 1H), 8.06 (dd, *J* = 7.6, 1.9 Hz, 1H), 8.00 (dd, *J* = 7.8, 1.9 Hz, 1H), 7.30 – 7.28 (m, 2H), 7.23 (t, *J* = 7.7 Hz, 1H), 7.08 (t, *J* = 7.6 Hz, 1H), 7.03 (dd, *J* = 7.5, 1.7 Hz, 1H), 6.83 (dd, *J* = 8.5, 2.5 Hz, 1H), 6.76 (d, *J* = 2.5 Hz, 1H), 2.83 – 2.88 (m, 2H), 2.60 (s, 1H), 2.39 – 2.31 (m, 2H), 2.28 – 2.23 (m, 1H), 2.05 – 1.99 (m, 1H), 1.98 – 1.94 (m, 4H), 1.92 – 1.86 (m, 2H), 1.83 – 1.67 (m, 3H), 1.55 – 1.48 (m, 1H), 1.45 (s, 9H), 1.42 – 1.32 (m, 3H), 0.88 (s, 3H). <sup>13</sup>C NMR (150 MHz, Chloroform-*d*) δ 187.90, 164.77, 157.86, 155.48, 148.32, 140.82, 138.30, 138.16, 137.13, 133.19, 131.19, 127.44, 127.14, 126.47, 126.14, 125.28, 123.49, 122.18, 121.46, 118.53, 87.48, 79.85, 74.13, 49.49, 47.07, 43.74, 39.04, 38.97, 35.36, 32.72, 30.37, 29.56, 27.03, 26.24, 22.82, 17.75, 12.68.

**HRMS** (ESI-TOF) (*m/z*): Calcd for C<sub>39</sub>H<sub>42</sub>NaO<sub>5</sub>, ([M + Na]<sup>+</sup>), 613.2924; found 613.2932.

[α]<sub>D</sub><sup>20</sup> = -15.6 (*c* = 1.21, CH<sub>2</sub>Cl<sub>2</sub>).

**(R)-2,5,6,8-tetramethyl-2-((4R,8S)-4,8,11-trimethyldodecyl)chroman-7-yl 2-(2-(tert-butyl)-6-methylphenoxy)-3-formylbenzoate (3ac')**

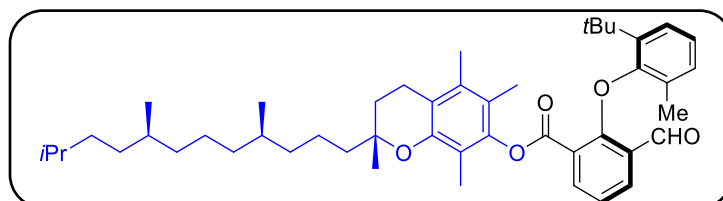

The title compound **3ac'** was prepared under the optimized conditions and purified by preparative TLC (hexane : ethyl acetate = 10:1). **3ac'** was obtained as a yellow oil (58.6 mg, 81%, dr > 20:1). <sup>1</sup>H NMR (500 MHz, Chloroform-*d*) δ 9.30 (s, 1H), 8.23 (dd, *J* = 7.6, 1.9 Hz, 1H), 7.96 (dd, *J* = 7.9, 1.9 Hz, 1H), 7.30 (dd, *J* = 7.9, 1.7 Hz, 1H), 7.24 (t, *J* = 7.7 Hz, 1H), 7.08 (t, *J* = 7.7 Hz, 1H), 7.02 (dd, *J* = 7.6, 1.6 Hz, 1H), 2.60 (t, *J* = 6.9 Hz, 3H), 2.10 (s, 6H), 2.06 (s, 3H), 1.97 (s, 3H), 1.85 – 1.73 (m, 2H), 1.58 – 1.49 (m, 3H), 1.44 (s, 9H), 1.40 – 1.35 (m, 3H), 1.32 – 1.17 (m, 12H), 1.15 – 1.03 (m, 6H), 0.87 – 0.84 (m, 12H). <sup>13</sup>C NMR (150 MHz, Chloroform-*d*) δ 187.60, 164.23, 158.28, 156.13, 149.59, 140.73, 140.54, 136.95, 133.45, 131.22, 127.48, 127.28, 126.70, 126.14, 125.40, 124.95, 123.96, 123.17, 122.11, 117.48, 75.10, 39.37, 37.45, 37.42, 37.29, 35.27, 32.79, 32.71, 31.09, 30.34, 27.97, 24.80, 24.44, 23.91, 22.71, 22.62, 21.03, 20.63, 19.75, 19.66, 17.53, 13.22, 12.37, 11.86.

**HRMS** (ESI-TOF) (*m/z*): Calcd for C<sub>48</sub>H<sub>68</sub>NaO<sub>5</sub>, ([M + Na]<sup>+</sup>), 747.4959; found 747.4960.

[α]<sub>D</sub><sup>20</sup> = -10.886 (*c* = 2.87, CH<sub>2</sub>Cl<sub>2</sub>).

**(S)-methyl 2-(4-bromo-2-(tert-butyl)-6-methylphenoxy)-3-formylbenzoate (3ba)**

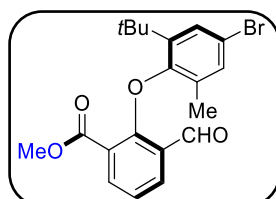

The title compound **3ba** was prepared under the optimized conditions and purified by preparative TLC (hexane : ethyl acetate = 10: 1). **3ba** was obtained as a yellow oil (28.7 mg, 71%). **<sup>1</sup>H NMR (500 MHz, Chloroform-*d*)**  $\delta$  10.02 (s, 1H), 7.98 (dd, *J* = 7.7, 1.9 Hz, 1H), 7.80 (dd, *J* = 7.6, 1.9 Hz, 1H), 7.40 (d, *J* = 2.4 Hz, 1H), 7.19 (t, *J* = 7.7 Hz, 1H), 7.15 (d, *J* = 2.4 Hz, 1H), 3.63 (s, 3H), 1.86 (s, 3H), 1.43 (s, 9H). **<sup>13</sup>C NMR (150 MHz, Chloroform-*d*)**  $\delta$  187.81, 166.36, 156.67, 153.58, 143.24, 136.78, 133.13, 132.32, 129.77, 129.05, 126.77, 123.54, 122.42, 117.93, 52.45, 35.61, 30.16, 17.60.

**HRMS (ESI-TOF) (m/z):** Calcd for C<sub>20</sub>H<sub>21</sub>BrNaO<sub>4</sub>, ([M + Na]<sup>+</sup>), 427.0515; found 427.0458.

**[ $\alpha$ ]<sub>D</sub><sup>20</sup>** = -39.4 (c = 1.43, CH<sub>2</sub>Cl<sub>2</sub>).

**HPLC analysis:** Daicel Chiralpak IG column (99:1 hexane: 2-propanol, 1 mL/min, 25 °C, 254 nm); *t*<sub>R</sub> (major) = 7.59 min, *t*<sub>R</sub> (minor) = 8.09 min, 98% ee.

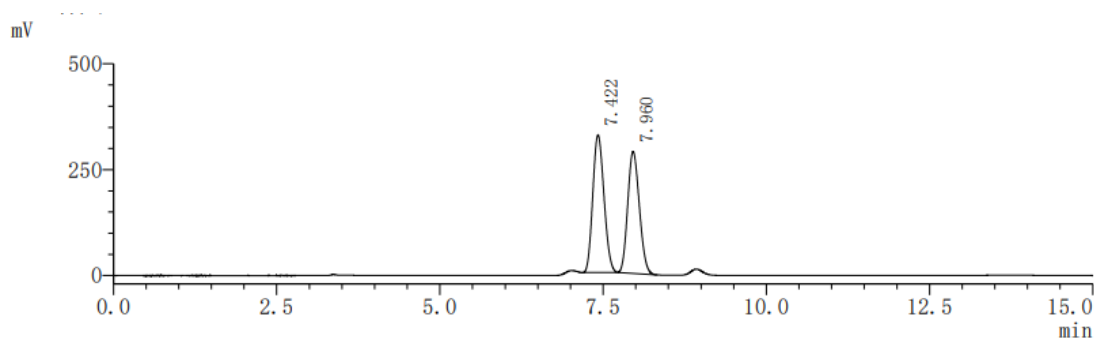

| Peak | PetTime | Type | Width(min) | Area    | Hight  | Area%   |
|------|---------|------|------------|---------|--------|---------|
| 1    | 7.422   | M    | 0.3197     | 3874764 | 324789 | 52.0222 |
| 2    | 7.960   | M    | 0.3320     | 3573532 | 287233 | 47.9778 |

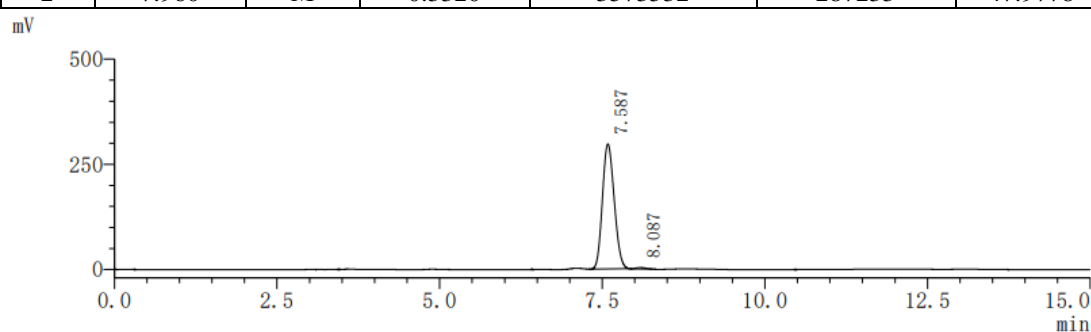

| Peak | PetTime | Type | Width(min) | Area    | Hight  | Area%   |
|------|---------|------|------------|---------|--------|---------|
| 1    | 7.587   | M    | 0.3364     | 3737514 | 296866 | 99.0618 |
| 2    | 8.087   | M    | 0.3038     | 35397   | 3195   | 0.9382  |

**(S)-methyl 2-(2-(tert-butyl)-4-chloro-6-methylphenoxy)-3-formylbenzoate (3ca)**

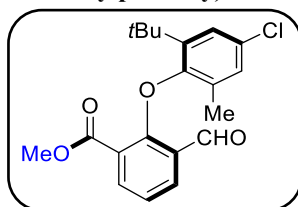

The title compound **3ca** was prepared under the optimized conditions and purified by preparative TLC (hexane : ethyl acetate = 10: 1). **3ca** was obtained as a yellow oil (28.1 mg, 78%). **<sup>1</sup>H NMR (500 MHz, Chloroform-*d*)**  $\delta$  10.01 (s, 1H), 7.98 (dd, *J* = 7.8, 1.9 Hz, 1H), 7.80 (dd, *J* = 7.6, 1.9 Hz, 1H), 7.26 (s, 1H), 7.19 (td, *J* = 7.7, 0.8 Hz, 1H), 7.00 (d, *J* = 2.4 Hz, 1H), 3.63 (s, 3H), 1.87 (s, 3H), 1.43 (s, 9H). **<sup>13</sup>C NMR (150 MHz, Chloroform-*d*)**  $\delta$  187.83, 166.37, 156.75, 153.02, 142.92, 136.76, 132.32, 130.08, 129.97, 129.40, 126.76, 126.13, 123.53, 122.37, 52.43, 35.61, 30.14, 17.67.

**HRMS** (ESI-TOF) ( $m/z$ ): Calcd for  $C_{20}H_{21}ClNaO_4$ ,  $([M + Na]^+)$ , 383.1021; found 383.1024.

$[\alpha]_D^{20} = -35.6$  ( $c = 1.40$ ,  $CH_2Cl_2$ ).

**HPLC analysis:** Daicel Chiralpak IG column (99:1 hexane: 2-propanol, 1 mL/min, 25 °C, 254 nm);  $t_R$  (major) = 7.22 min,  $t_R$  (minor) = 7.68 min, 96% ee.

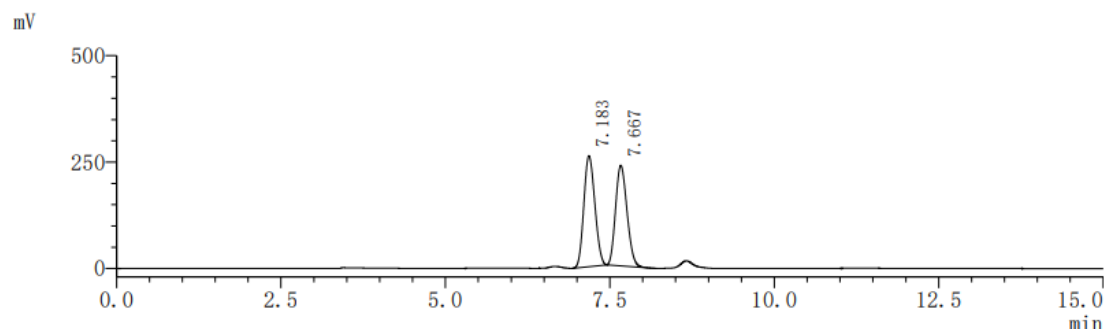

| Peak | PetTime | Type | Width(min) | Area    | Hight  | Area%   |
|------|---------|------|------------|---------|--------|---------|
| 1    | 7.183   | M    | 0.3127     | 3024705 | 259880 | 51.4389 |
| 2    | 7.667   | M    | 0.3237     | 2855488 | 235517 | 48.5611 |

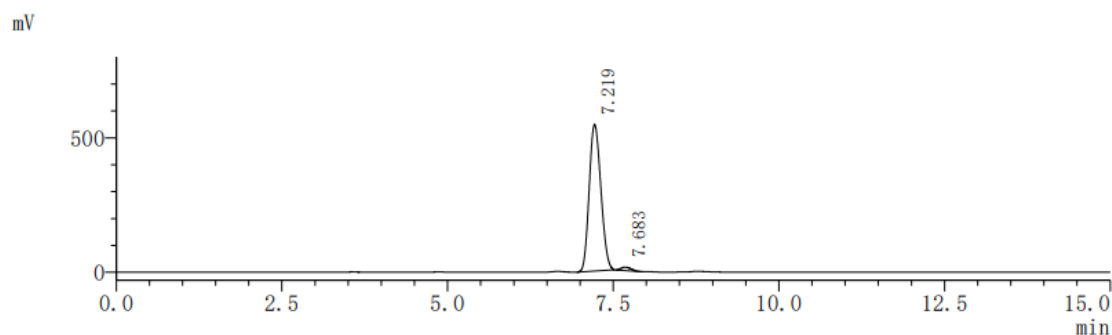

| Peak | PetTime | Type | Width(min) | Area    | Hight  | Area%   |
|------|---------|------|------------|---------|--------|---------|
| 1    | 7.219   | M    | 0.3279     | 6672787 | 544673 | 98.0450 |
| 2    | 7.683   | M    | 0.2861     | 133054  | 12741  | 1.9550  |

**(S)**-pyridin-3-yl 2-(2-(tert-butyl)-6-methyl-4-(pyridin-3-yl)phenoxy)-3-formylbenzoate (**3do**)

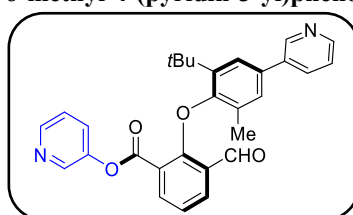

The title compound **3do** was prepared under the optimized conditions and purified by preparative TLC (ethyl acetate). **3do** was obtained as a yellow oil (28.4 mg, 61%). **<sup>1</sup>H NMR (500 MHz, Chloroform-*d*)**  $\delta$  9.92 (s, 1H), 8.80 (s, 1H), 8.60 (d,  $J = 4.8$  Hz, 1H), 8.49 (d,  $J = 4.7$  Hz, 1H), 8.42 (d,  $J = 2.6$  Hz, 1H), 8.15 – 8.06 (m, 2H), 7.83 (d,  $J = 7.9$  Hz, 1H), 7.48 (s, 1H), 7.44 – 7.34 (m, 2H), 7.34 – 7.27 (m, 2H), 7.25 (s, 1H), 2.04 (s, 3H), 1.50 (s, 9H). **<sup>13</sup>C NMR (150 MHz, Chloroform-*d*)**  $\delta$  187.50, 163.53, 157.81, 155.28, 148.52, 148.20, 147.25, 147.19, 143.16, 141.67, 137.34, 136.04, 134.75, 134.36, 133.81, 129.73, 129.06, 127.97, 127.30, 125.27, 123.88, 123.57, 122.65, 122.23, 35.63, 30.32, 18.07.

**HRMS** (ESI-TOF) ( $m/z$ ): Calcd for  $C_{29}H_{26}NaN_2O_4$ ,  $([M + Na]^+)$ , 489.1785; found 489.1784.

$[\alpha]_D^{20} = -38.7$  ( $c = 1.66$ ,  $CH_2Cl_2$ ).

**HPLC analysis:** Daicel Chiralpak AD-3 column (85:15 hexane: 2-propanol, 1 mL/min, 25 °C, 254 nm);  $t_R$  (minor) = 18.01 min,  $t_R$  (major) = 19.09 min, 91% ee.

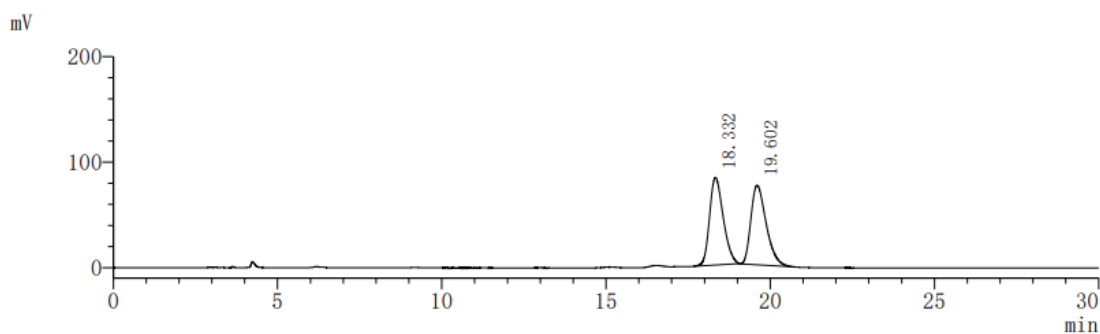

| Peak | PetTime | Type | Width(min) | Area    | Hight | Area%   |
|------|---------|------|------------|---------|-------|---------|
| 1    | 18.332  | M    | 0.7696     | 2404530 | 82930 | 49.5557 |
| 2    | 19.602  | M    | 0.8561     | 2447642 | 75457 | 50.4443 |

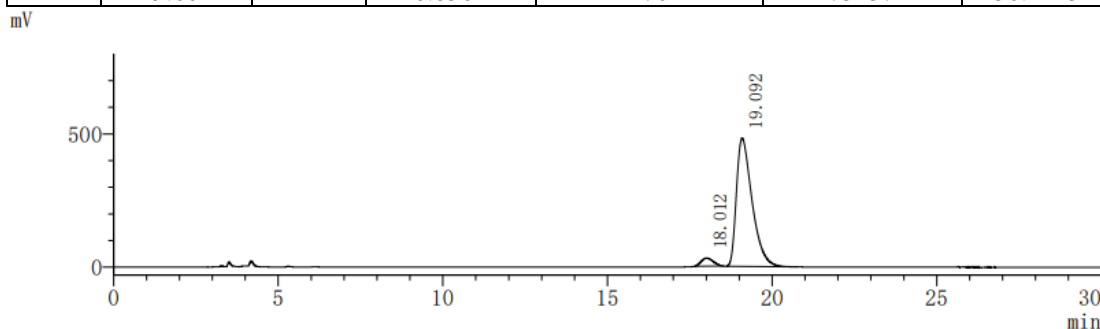

| Peak | PetTime | Type | Width(min) | Area     | Hight  | Area%   |
|------|---------|------|------------|----------|--------|---------|
| 1    | 18.012  | M    | 0.6882     | 757313   | 30186  | 4.5518  |
| 2    | 19.092  | M    | 0.8636     | 15880409 | 480862 | 95.4482 |

**(S)-pyridin-3-yl 2-(2-(tert-butyl)-6-methyl-4-(1-methyl-1H-indol-5-yl)phenoxy)-3-formylbenzoate (3eo)**

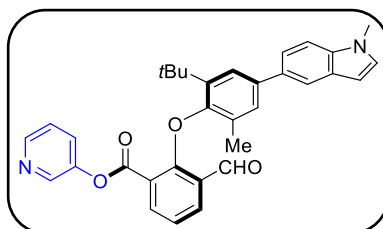

The title compound **3eo** was prepared under the optimized conditions and purified by preparative TLC (hexane : ethyl acetate = 2: 1). **3eo** was obtained as a yellow oil (32.7 mg, 63%). **<sup>1</sup>H NMR (500 MHz, Chloroform-*d*)**  $\delta$  9.95 (s, 1H), 8.49 – 8.41 (m, 2H), 8.13 – 8.02 (m, 2H), 7.77 (s, 1H), 7.55 (s, 1H), 7.45 – 7.32 (m, 3H), 7.30 (s, 1H), 7.29 – 7.19 (m, 2H), 7.09 (d, *J* = 3.1 Hz, 1H), 6.54 (d, *J* = 3.0 Hz, 1H), 3.83 (s, 3H), 2.05 (s, 3H), 1.50 (s, 9H). **<sup>13</sup>CNMR (150 MHz, Chloroform-*d*)**  $\delta$  187.91, 163.86, 158.08, 153.78, 147.23, 147.16, 143.11, 141.02, 139.72, 137.19, 136.27, 133.64, 132.12, 129.73, 129.60, 129.31, 128.95, 127.45, 127.30, 125.46, 123.89, 122.22, 122.20, 121.27, 119.36, 109.46, 101.31, 35.55, 32.99, 30.50, 18.01.

**HRMS (ESI-TOF)** (*m/z*): Calcd for C<sub>33</sub>H<sub>30</sub>NaN<sub>2</sub>O<sub>4</sub>, ([M + Na]<sup>+</sup>), 541.2098; found 541.2101.

**[ $\alpha$ ]<sub>D</sub><sup>20</sup>** = -43.8 (*c* = 1.84, CH<sub>2</sub>Cl<sub>2</sub>).

**HPLC analysis:** Daicel Chiralpak AD-3 column (95:5 hexane: 2-propanol, 1 mL/min, 25 °C, 254 nm); *t<sub>R</sub>* (minor) = 35.34 min, *t<sub>R</sub>* (major) = 37.09 min, 96% ee.

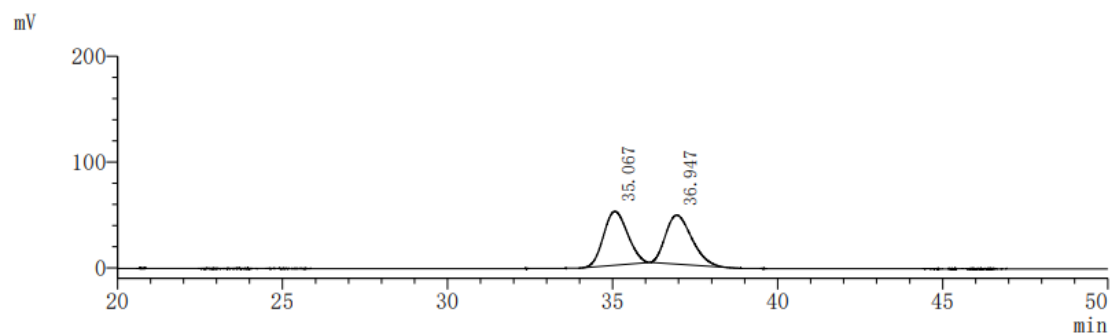

| Peak | PetTime | Type | Width(min) | Area    | Hight | Area%   |
|------|---------|------|------------|---------|-------|---------|
| 1    | 35.067  | M    | 1.3593     | 2573704 | 50909 | 50.1042 |
| 2    | 36.947  | M    | 1.4777     | 2563000 | 46308 | 49.8958 |

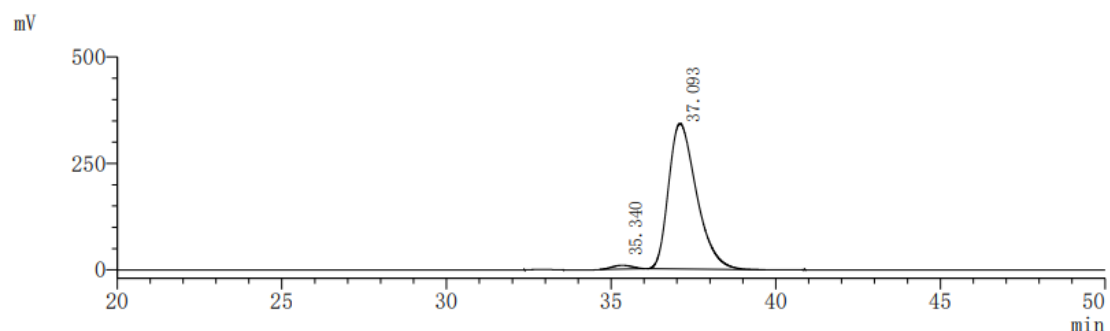

| Peak | PetTime | Type | Width(min) | Area     | Hight  | Area%   |
|------|---------|------|------------|----------|--------|---------|
| 1    | 35.340  | M    | 1.1649     | 383806   | 8936   | 1.8626  |
| 2    | 37.093  | M    | 1.5528     | 20222541 | 341895 | 98.1374 |

**(S)-benzofuran-5-yl 2-((3-(tert-butyl)-5-methyl-[1,1'-biphenyl]-4-yl)oxy)-3-formylbenzoate (3fr)**

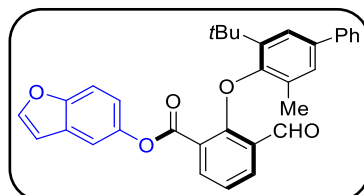

The title compound **3fr** was prepared under the optimized conditions and purified by preparative TLC (hexane : ethyl acetate = 10: 1). **3fr** was obtained as a yellow oil (30.8 mg, 61%). **<sup>1</sup>H NMR (500 MHz, Chloroform-*d*)**  $\delta$  10.04 (s, 1H), 8.07 (dd, *J* = 7.6, 2.7 Hz, 2H), 7.61 (d, *J* = 2.1 Hz, 1H), 7.57 (s, 1H), 7.56 (s, 1H), 7.51 (d, *J* = 2.3 Hz, 1H), 7.47 – 7.39 (m, 3H), 7.36 (d, *J* = 7.1 Hz, 1H), 7.28 (d, *J* = 7.8 Hz, 2H), 7.15 (d, *J* = 2.3 Hz, 1H), 6.91 (dd, *J* = 8.8, 2.3 Hz, 1H), 6.60 (s, 1H), 2.06 (s, 3H), 1.49 (s, 9H). **<sup>13</sup>C NMR (150 MHz, Chloroform-*d*)**  $\delta$  188.06, 164.76, 157.69, 154.45, 152.59, 146.27, 145.99, 141.37, 140.61, 137.97, 137.19, 133.00, 129.57, 128.79, 128.02, 127.67, 127.30, 127.20, 127.09, 125.22, 123.21, 122.30, 117.82, 113.68, 111.79, 106.88, 35.60, 30.47, 18.09.

**HRMS (ESI-TOF)** (*m/z*): Calcd for C<sub>33</sub>H<sub>28</sub>NaO<sub>5</sub>, ([M + Na]<sup>+</sup>), 527.1829; found 527.1827 .

**[ $\alpha$ ]<sub>D</sub><sup>20</sup>** = -58.7 (*c* = 1.54, CH<sub>2</sub>Cl<sub>2</sub>).

**HPLC analysis:** Daicel Chiralpak IC-3 column (99:1 hexane: 2-propanol, 1 mL/min, 25 °C, 254 nm); *t<sub>R</sub>* (minor) = 15.84 min, *t<sub>R</sub>* (major) = 17.49 min, 99% ee.

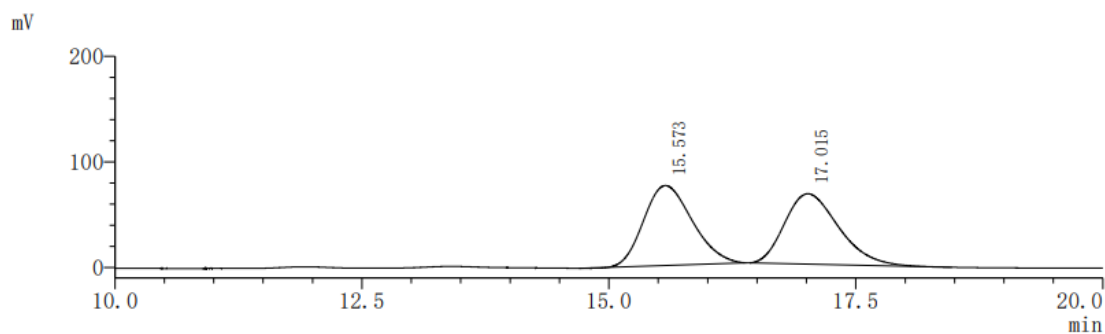

| Peak | PetTime | Type | Width(min) | Area    | Hight | Area%   |
|------|---------|------|------------|---------|-------|---------|
| 1    | 15.573  | M    | 0.9163     | 2584603 | 75634 | 50.3946 |
| 2    | 17.015  | M    | 1.0066     | 2544129 | 66670 | 49.6054 |

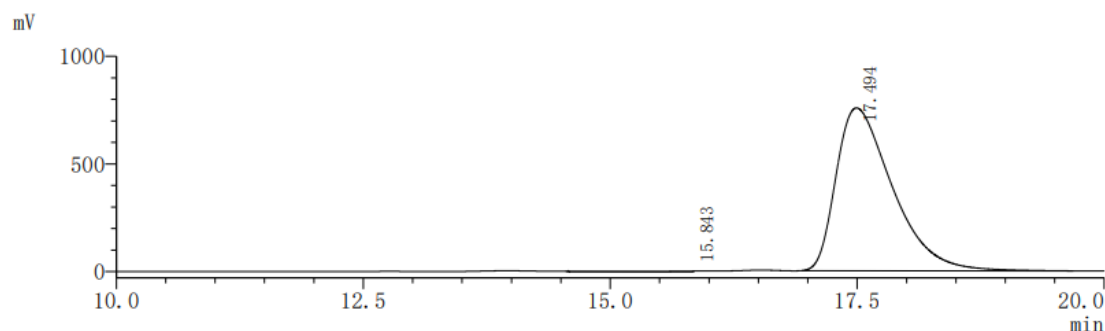

| Peak | PetTime | Type | Width(min) | Area     | Hight  | Area%   |
|------|---------|------|------------|----------|--------|---------|
| 1    | 15.843  | M    | --         | 59327    | 3113   | 0.1970  |
| 2    | 17.494  | M    | 1.0422     | 30048413 | 756387 | 99.8030 |

**(S)-benzofuran-5-yl-2-((3-(tert-butyl)-3',5-dimethyl-[1,1'-biphenyl]-4-yl)oxy)-3-formylbenzoate compound with ethane (1:1) (3gr)**

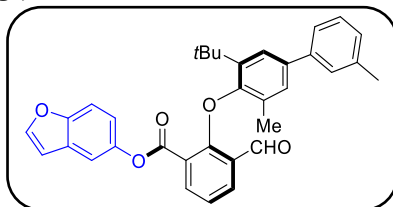

The title compound **3gr** was prepared under the optimized conditions and purified by preparative TLC (hexane : ethyl acetate = 10: 1). **3gr** was obtained as a yellow oil (37.3 mg, 72%). **<sup>1</sup>H NMR (500 MHz, Chloroform-*d*)**  $\delta$  10.05 (s, 1H), 8.11 – 8.01 (m, 2H), 7.61 (d, *J* = 2.2 Hz, 1H), 7.50 (d, *J* = 2.3 Hz, 1H), 7.42 (d, *J* = 8.8 Hz, 1H), 7.39 – 7.31 (m, 3H), 7.31 – 7.24 (m, 2H), 7.18 (d, *J* = 7.2 Hz, 1H), 7.14 (d, *J* = 2.4 Hz, 1H), 6.91 (dd, *J* = 8.8, 2.4 Hz, 1H), 6.59 (d, *J* = 2.2 Hz, 1H), 2.43 (s, 3H), 2.06 (s, 3H), 1.50 (s, 9H). **<sup>13</sup>C NMR (150 MHz, Chloroform-*d*)**  $\delta$  188.10, 164.78, 157.71, 154.34, 152.59, 146.25, 145.99, 141.32, 140.64, 138.37, 138.16, 137.18, 132.98, 129.60, 128.70, 128.06, 128.02, 127.91, 127.62, 127.19, 125.24, 124.23, 123.19, 122.27, 117.82, 113.72, 111.79, 106.89, 35.60, 30.50, 21.58, 18.08.

**HRMS** (ESI-TOF) (*m/z*): Calcd for C<sub>34</sub>H<sub>30</sub>NaO<sub>5</sub>, ([M + Na]<sup>+</sup>), 541.1985; found 541.1990.

**[ $\alpha$ ]<sub>D</sub><sup>20</sup>** = -59.7 (*c* = 1.87, CH<sub>2</sub>Cl<sub>2</sub>).

**HPLC analysis:** Daicel Chiralpak IG column (97:3 hexane: 2-propanol, 1 mL/min, 25 °C, 254 nm); *t<sub>R</sub>* (major) = 11.12 min, *t<sub>R</sub>* (minor) = 12.70 min, 92% ee.

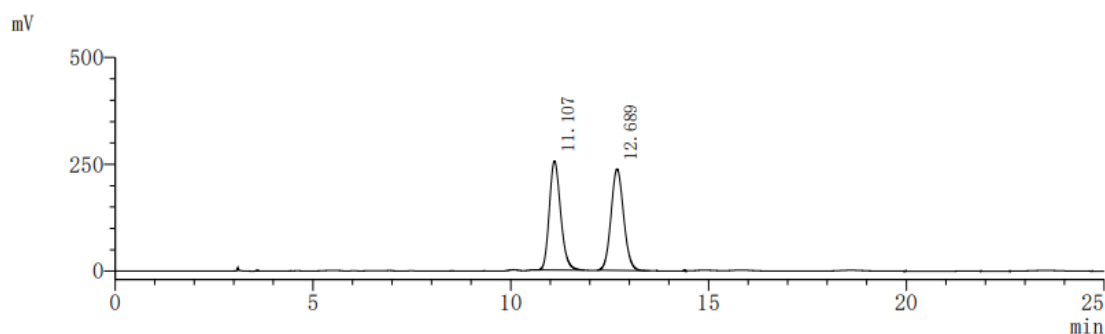

| Peak | PetTime | Type | Width(min) | Area    | Hight  | Area%   |
|------|---------|------|------------|---------|--------|---------|
| 1    | 11.107  | M    | 0.5194     | 5072701 | 254915 | 49.0552 |
| 2    | 12.689  | M    | 0.5822     | 5268109 | 237580 | 50.9448 |

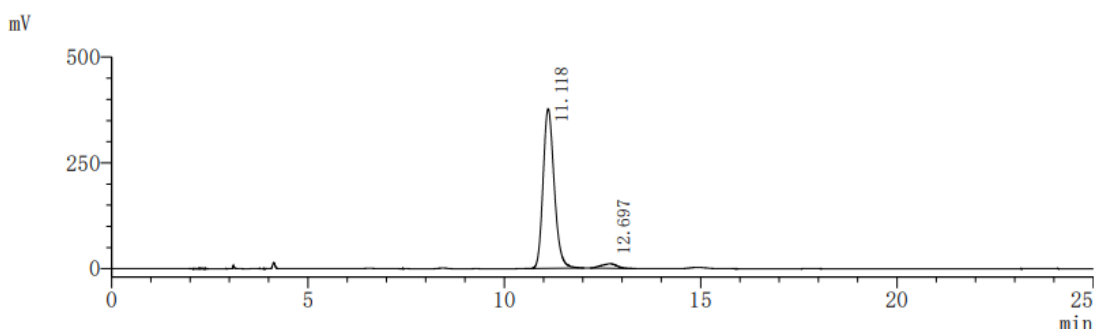

| Peak | PetTime | Type | Width(min) | Area    | Hight  | Area%   |
|------|---------|------|------------|---------|--------|---------|
| 1    | 11.118  | M    | 0.5121     | 7445837 | 377131 | 96.1890 |
| 2    | 12.697  | M    | 0.8134     | 295002  | 10691  | 3.8110  |

**(S)-benzofuran-5-yl-2-((3-(tert-butyl)-3'-fluoro-5-methyl-[1,1'-biphenyl]-4-yl)oxy)-3-formylbenzoate compound with ethane (1:1) (3hr)**

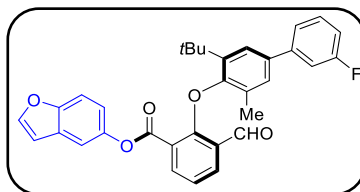

The title compound **3hr** was prepared under the optimized conditions and purified by preparative TLC (hexane : ethyl acetate = 10: 1). **3hr** was obtained as a yellow oil (26.7 mg, 51%). **<sup>1</sup>H NMR (500 MHz, Chloroform-*d*)**  $\delta$  10.03 (s, 1H), 8.07 (d, *J* = 7.7 Hz, 2H), 7.62 (d, *J* = 2.2 Hz, 1H), 7.47 (d, *J* = 2.3 Hz, 1H), 7.44 – 7.36 (m, 2H), 7.35 – 7.28 (m, 2H), 7.26 (d, *J* = 2.5 Hz, 1H), 7.23 (t, *J* = 2.1 Hz, 1H), 7.14 (d, *J* = 2.4 Hz, 1H), 7.07 – 7.00 (m, 1H), 6.90 (dd, *J* = 8.9, 2.4 Hz, 1H), 6.63 – 6.59 (m, 1H), 2.05 (s, 3H), 1.49 (s, 9H). **<sup>13</sup>C NMR (150 MHz, Chloroform-*d*)**  $\delta$  187.95, 164.65, 163.97, 162.35, 157.59, 154.86, 152.59, 146.33, 145.97, 142.88 (d, *J* = 7.9 Hz), 141.55, 137.23, 136.60 (d, *J* = 2.3 Hz), 133.04, 130.25 (d, *J* = 8.5 Hz), 129.56, 128.01, 127.80, 127.19, 125.14, 123.19, 122.68 (d, *J* = 2.8 Hz), 122.44, 117.75, 113.99 (dd, *J* = 21.6, 18.7 Hz), 113.60, 111.81, 106.82, 35.62, 30.42, 18.10. **<sup>19</sup>F NMR (565 MHz, Chloroform-*d*)**  $\delta$  -112.94 – -112.98 (m, 1F).

**HRMS (ESI-TOF) (m/z):** Calcd for C<sub>33</sub>H<sub>27</sub>FNao<sub>5</sub>, ([M + Na]<sup>+</sup>), 545.1735; found 545.1737.

**[ $\alpha$ ]<sub>D</sub><sup>20</sup>** = -37.9 (*c* = 1.33, CH<sub>2</sub>Cl<sub>2</sub>).

**HPLC analysis:** Daicel Chiralpak AD-3 column (99:1 hexane: 2-propanol, 0.6 mL/min, 25 °C, 254 nm); *t<sub>R</sub>* (major) = 22.43 min, *t<sub>R</sub>* (minor) = 24.79 min, 99% ee.

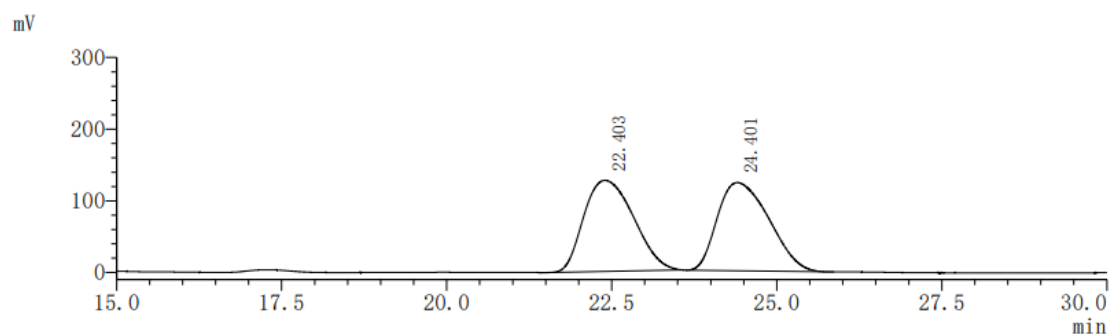

| Peak | PetTime | Type | Width(min) | Area    | Hight  | Area%   |
|------|---------|------|------------|---------|--------|---------|
| 1    | 22.403  | M    | 1.3875     | 6671878 | 127043 | 49.9507 |
| 2    | 24.401  | M    | 1.4683     | 6685035 | 123057 | 50.0493 |

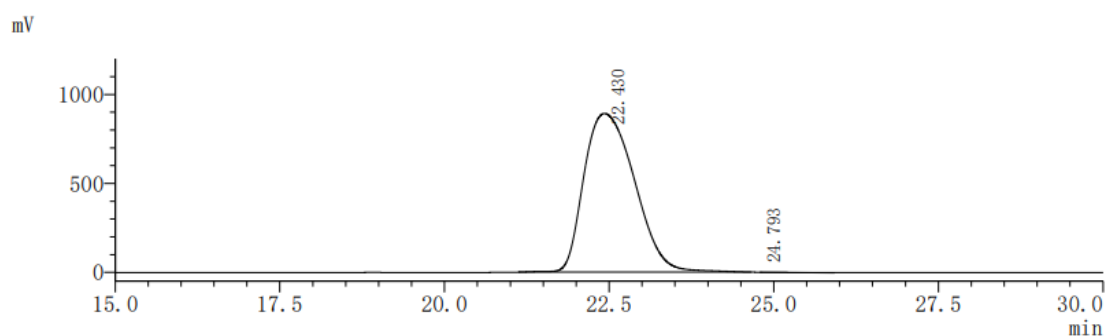

| Peak | PetTime | Type | Width(min) | Area     | Hight  | Area%   |
|------|---------|------|------------|----------|--------|---------|
| 1    | 22.430  | M    | 1.3879     | 47813229 | 891985 | 99.8451 |
| 2    | 24.793  | M    | --         | 74194    | 396    | 0.1549  |

**(S)-benzofuran-5-yl-2-((3,4'-di-tert-butyl-5-methyl-[1,1'-biphenyl]-4-yl)oxy)-3-formylbenzoate**  
**(3ir)**

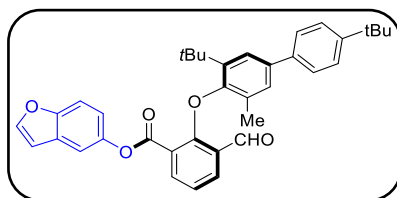

The title compound **3ir** was prepared under the optimized conditions and purified by preparative TLC (hexane : ethyl acetate = 10: 1). **3ir** was obtained as a yellow oil (45.4 mg, 81%). **<sup>1</sup>H NMR (500 MHz, Chloroform-*d*)**  $\delta$  10.01 (s, 1H), 8.07 (d, *J* = 7.7 Hz, 2H), 7.61 (d, *J* = 2.2 Hz, 1H), 7.54 – 7.45 (m, 6H), 7.42 (d, *J* = 8.8 Hz, 1H), 7.26 (d, *J* = 8.4 Hz, 1H), 7.17 (d, *J* = 2.4 Hz, 1H), 6.93 (d, *J* = 2.4 Hz, 1H), 6.59 (d, *J* = 2.1 Hz, 1H), 2.06 (s, 3H), 1.50 (s, 9H), 1.38 (s, 9H). **<sup>13</sup>C NMR (150 MHz, Chloroform-*d*)**  $\delta$  188.07, 164.80, 157.76, 154.29, 152.59, 150.35, 146.21, 146.02, 141.27, 137.88, 137.73, 137.17, 133.01, 129.41, 128.02, 127.62, 127.21, 126.75, 125.73, 125.11, 123.23, 122.25, 117.86, 113.73, 111.80, 106.90, 35.59, 34.58, 31.40, 30.49, 18.08.

**HRMS (ESI-TOF)** (m/z): Calcd for C<sub>37</sub>H<sub>36</sub>NaO<sub>5</sub>, ([M + Na]<sup>+</sup>), 583.2455; found 583.2457.

**[ $\alpha$ ]<sub>D</sub><sup>20</sup>** = -44.9 (c = 2.27, CH<sub>2</sub>Cl<sub>2</sub>).

**HPLC analysis:** Daicel Chiralpak IG column (99:1 hexane: 2-propanol, 1 mL/min, 25 °C, 254 nm); *t<sub>R</sub>* (major) = 18.55 min, *t<sub>R</sub>* (minor) = 21.95 min, 98% ee.

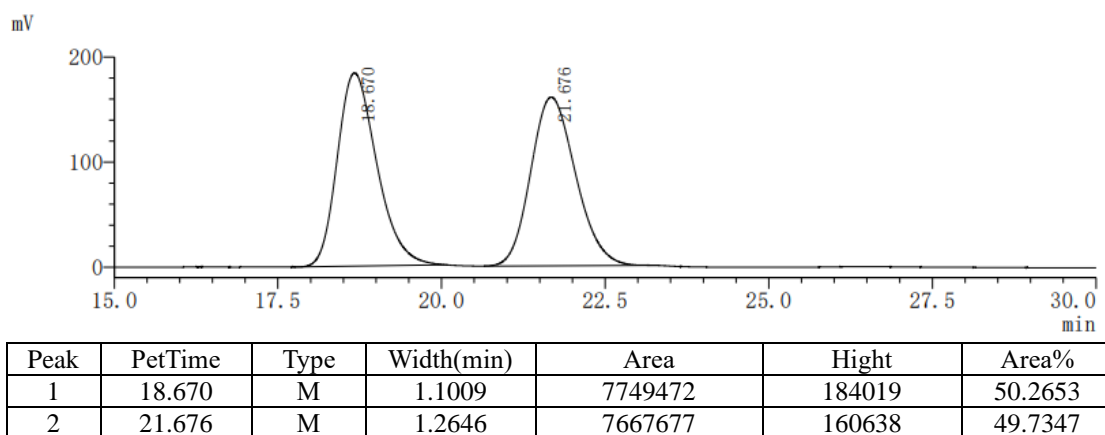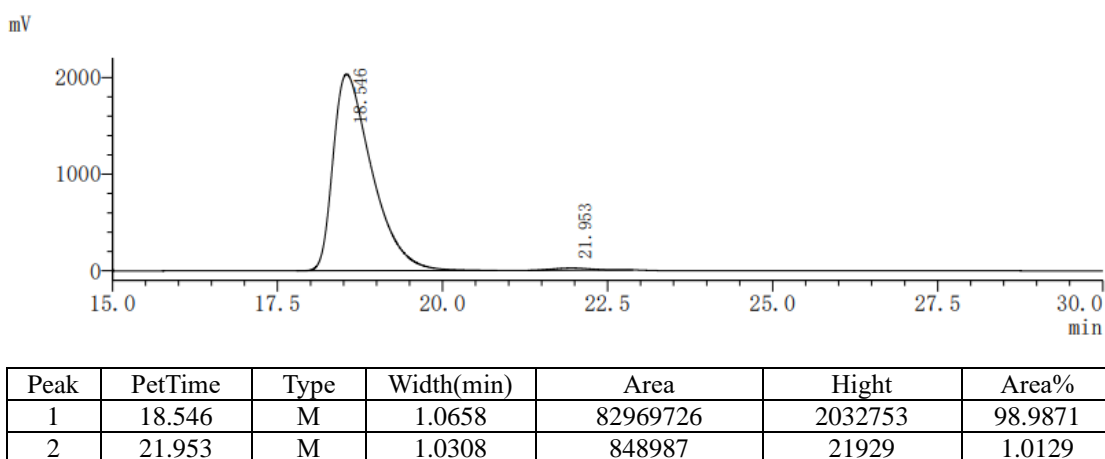

**(S)-benzofuran-5-yl-2-(2-(tert-butyl)-6-methyl-4-(naphthalen-2-yl)phenoxy)-3-formylbenzoate (3jr)**

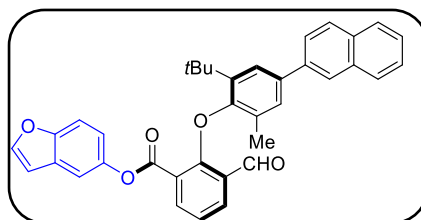

The title compound **3jr** was prepared under the optimized conditions and purified by preparative TLC (hexane : ethyl acetate = 10: 1). **3jr** was obtained as a yellow oil (41.6 mg, 75%). **<sup>1</sup>H NMR (500 MHz, Chloroform-*d*)**  $\delta$  10.10 (s, 1H), 8.15 – 8.04 (m, 2H), 8.00 (s, 1H), 7.93 (d, *J* = 8.5 Hz, 1H), 7.91 – 7.86 (m, 2H), 7.72 (dd, *J* = 8.5, 1.9 Hz, 1H), 7.64 (d, *J* = 2.3 Hz, 1H), 7.58 (d, *J* = 2.2 Hz, 1H), 7.55 – 7.47 (m, 2H), 7.45 – 7.38 (m, 2H), 7.29 (t, *J* = 7.7 Hz, 1H), 7.17 (d, *J* = 2.3 Hz, 1H), 6.93 (dt, *J* = 8.9, 1.8 Hz, 1H), 6.55 (d, *J* = 2.2 Hz, 1H), 2.10 (s, 3H), 1.53 (s, 9H). **<sup>13</sup>C NMR (150 MHz, Chloroform-*d*)**  $\delta$  188.13, 164.79, 157.71, 154.54, 152.60, 146.30, 146.01, 141.54, 138.01, 137.91, 137.24, 133.67, 133.02, 132.62, 129.89, 128.50, 128.17, 128.04, 127.82, 127.71, 127.23, 126.42, 126.00, 125.71, 125.53, 125.50, 123.23, 122.36, 117.82, 113.71, 111.82, 106.90, 35.68, 30.53, 18.16.

**HRMS (ESI-TOF) (m/z):** Calcd for C<sub>37</sub>H<sub>30</sub>BrNaO<sub>5</sub>, ([M + Na]<sup>+</sup>), 577.1985; found 577.1987.

**[ $\alpha$ ]<sub>D</sub><sup>20</sup>** = -30.7 (c = 2.36, CH<sub>2</sub>Cl<sub>2</sub>).

**HPLC analysis:** Daicel Chiralpak IA-3 column (99:1 hexane: 2-propanol, 1 mL/min, 25 °C, 254 nm); *t<sub>R</sub>* (major) = 29.53 min, *t<sub>R</sub>* (minor) = 31.23 min, 99% ee.

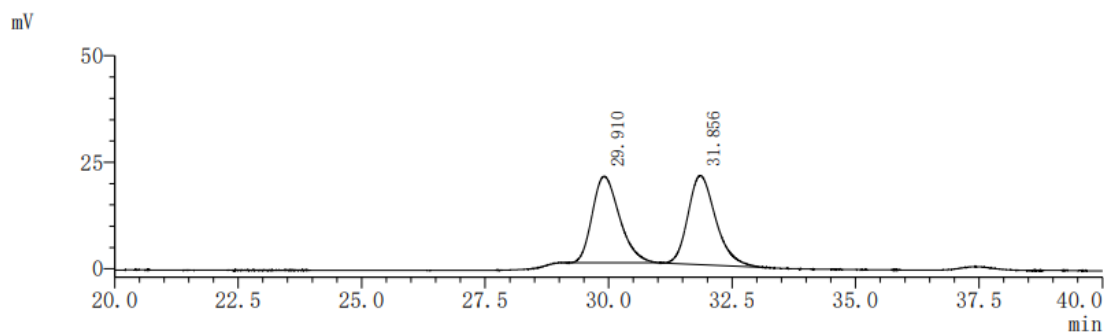

| Peak | PetTime | Type | Width(min) | Area   | Hight | Area%   |
|------|---------|------|------------|--------|-------|---------|
| 1    | 29.910  | M    | 1.0131     | 780540 | 20266 | 48.7556 |
| 2    | 31.856  | M    | 1.0132     | 820383 | 20893 | 51.2444 |

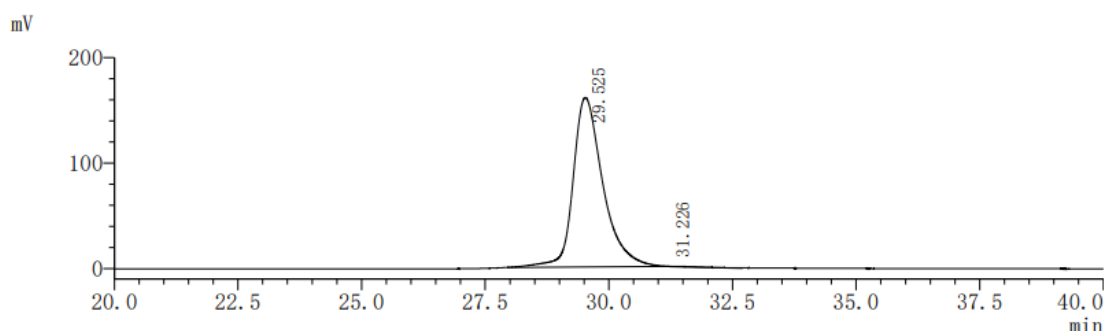

| Peak | PetTime | Type | Width(min) | Area    | Hight  | Area%   |
|------|---------|------|------------|---------|--------|---------|
| 1    | 29.525  | M    | 1.0329     | 6717287 | 160631 | 99.5723 |
| 2    | 31.226  | M    | 1.2856     | 28852   | 348    | 0.4277  |

**(S)-benzofuran-5-yl-2-(4-(benzo[d][1,3]dioxol-5-yl)-2-(tert-butyl)-6-methylphenoxy)-3-formylbenzoate (3kr)**

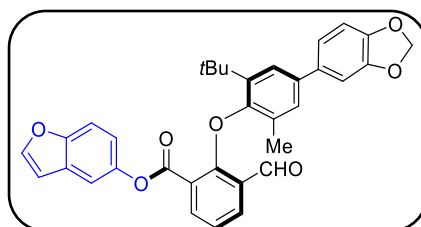

The title compound **3kr** was prepared under the optimized conditions and purified by preparative TLC (hexane : ethyl acetate = 10: 1). **3kr** was obtained as a yellow oil (41.7 mg, 76%). **<sup>1</sup>H NMR (500 MHz, Chloroform-*d*)**  $\delta$  10.01 (s, 1H), 8.07 (d, *J* = 7.7 Hz, 2H), 7.62 (d, *J* = 2.2 Hz, 1H), 7.42 (d, *J* = 8.8 Hz, 2H), 7.28 (d, *J* = 7.7 Hz, 1H), 7.20 (d, *J* = 2.3 Hz, 1H), 7.16 (d, *J* = 2.4 Hz, 1H), 7.04 (d, *J* = 1.7 Hz, 1H), 7.02 (dd, *J* = 8.1, 2.0 Hz, 1H), 6.91 (dd, *J* = 8.9, 2.4 Hz, 1H), 6.88 (d, *J* = 8.0 Hz, 1H), 6.65 – 6.63 (m, 1H), 6.02 (d, *J* = 1.2 Hz, 2H), 2.04 (s, 3H), 1.48 (s, 9H). **<sup>13</sup>C NMR (150 MHz, Chloroform-*d*)**  $\delta$  188.07, 164.79, 157.72, 154.23, 152.61, 148.14, 147.09, 146.31, 146.02, 141.32, 137.72, 137.19, 135.03, 133.02, 129.28, 128.03, 127.66, 127.20, 124.94, 123.23, 122.29, 120.60, 117.84, 113.67, 111.81, 108.58, 107.63, 106.88, 101.21, 35.57, 30.45, 18.06.

**HRMS (ESI-TOF)** (*m/z*): Calcd for C<sub>34</sub>H<sub>28</sub>NaO<sub>7</sub>, ([M + Na]<sup>+</sup>), 571.1727; found 571.1718.

[ $\alpha$ ]<sub>D</sub><sup>20</sup> = -32.2 (*c* = 2.08, CH<sub>2</sub>Cl<sub>2</sub>).

**HPLC analysis:** Daicel Chiralpak IC-3 column (97:3 hexane: 2-propanol, 1 mL/min, 25 °C, 254 nm); *t*<sub>R</sub> (minor) = 16.77 min, *t*<sub>R</sub> (major) = 17.64 min, 95% ee.

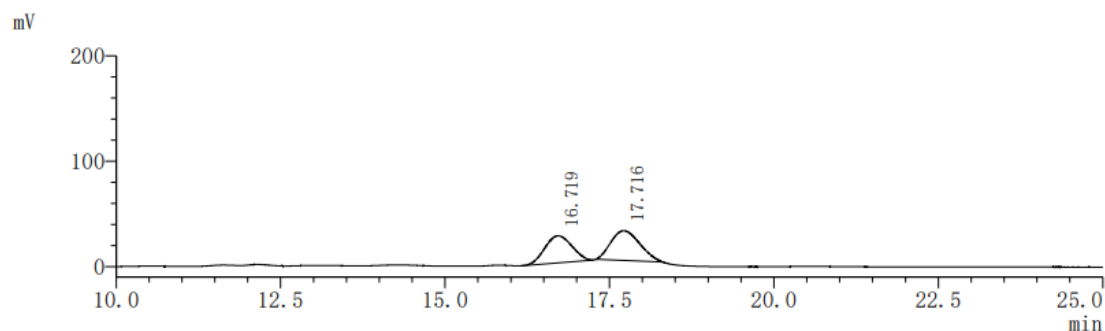

| Peak | PetTime | Type | Width(min) | Area   | Hight | Area%   |
|------|---------|------|------------|--------|-------|---------|
| 1    | 16.719  | M    | 0.7767     | 730992 | 25577 | 45.8125 |
| 2    | 17.716  | M    | 0.8437     | 864627 | 28168 | 54.1875 |

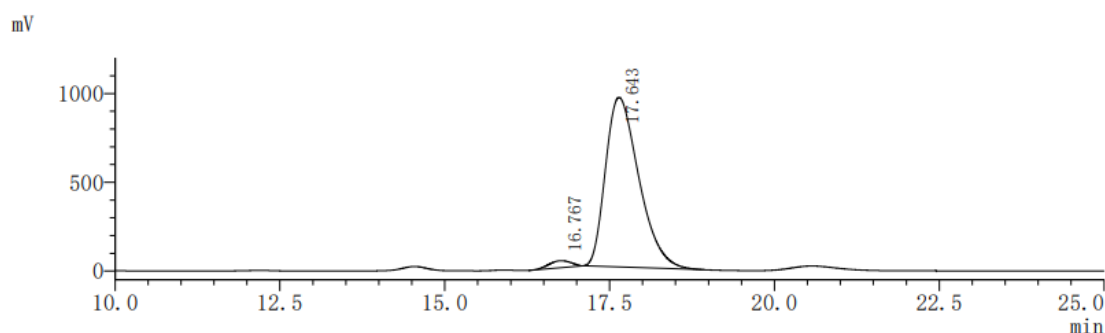

| Peak | PetTime | Type | Width(min) | Area     | Hight  | Area%   |
|------|---------|------|------------|----------|--------|---------|
| 1    | 16.767  | M    | 0.6396     | 930050   | 39454  | 2.6887  |
| 2    | 17.643  | M    | 0.9263     | 33660728 | 955609 | 97.3113 |

**(S)-benzofuran-5-yl 2-(2-(tert-butyl)-6-methyl-4-(thiophen-3-yl)phenoxy)-3-formylbenzoate (31r)**

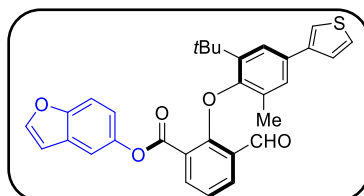

The title compound **31r** was prepared under the optimized conditions and purified by preparative TLC (hexane : ethyl acetate = 10: 1). **31r** was obtained as a yellow oil (28.1 mg, 55%). **<sup>1</sup>H NMR (500 MHz, Chloroform-*d*)**  $\delta$  10.02 (d, *J* = 0.8 Hz, 1H), 8.06 (dd, *J* = 7.7, 0.8 Hz, 2H), 7.61 (d, *J* = 2.2 Hz, 1H), 7.52 (d, *J* = 2.3 Hz, 1H), 7.43 – 7.40 (m, 3H), 7.36 (dd, *J* = 4.4, 2.0 Hz, 1H), 7.29 (d, *J* = 2.2 Hz, 1H), 7.28 (dd, *J* = 7.7, 0.8 Hz, 1H), 7.14 (d, *J* = 2.4 Hz, 1H), 6.92 (dd, *J* = 8.9, 2.4 Hz, 1H), 6.57 (dd, *J* = 2.2, 1.0 Hz, 1H), 2.04 (s, 3H), 1.48 (s, 9H). **<sup>13</sup>C NMR (150 MHz, Chloroform-*d*)**  $\delta$  188.05, 164.75, 157.70, 154.20, 152.59, 146.30, 145.99, 141.78, 141.48, 137.16, 133.02, 132.77, 128.88, 128.04, 127.79, 127.18, 126.35, 124.52, 123.17, 122.29, 120.20, 117.79, 113.74, 111.78, 106.85, 35.53, 30.42, 18.00.

**HRMS (ESI-TOF) (m/z):** Calcd for C<sub>31</sub>H<sub>26</sub>NaO<sub>5</sub>S, ([M + Na]<sup>+</sup>), 533.1393; found 533.1387.

**[ $\alpha$ ]<sub>D</sub><sup>20</sup>** = -37.1 (*c* = 1.40, CH<sub>2</sub>Cl<sub>2</sub>).

**HPLC analysis:** Daicel Chiralpak AD-3 column (97:3 hexane: 2-propanol, 1 mL/min, 25 °C, 254 nm); *t<sub>R</sub>* (major) = 20.80 min, *t<sub>R</sub>* (minor) = 26.00 min, 95% ee.

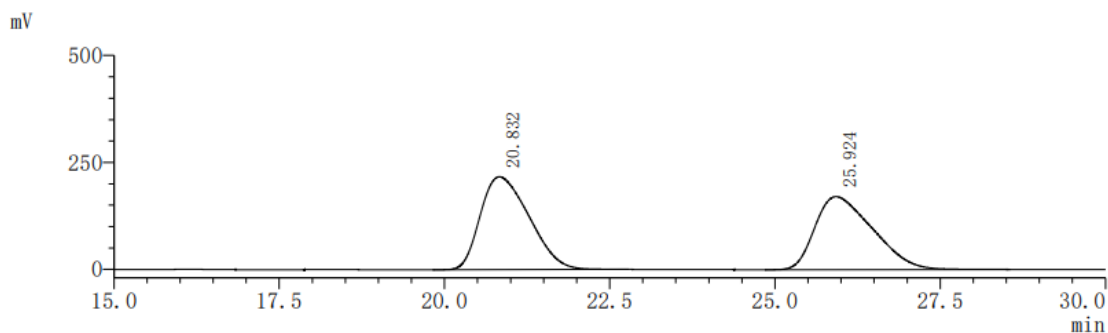

| Peak | PetTime | Type | Width(min) | Area     | Hight  | Area%   |
|------|---------|------|------------|----------|--------|---------|
| 1    | 20.832  | M    | 1.4030     | 11141021 | 216967 | 51.9316 |
| 2    | 25.924  | M    | 1.7005     | 10312240 | 170642 | 48.0684 |

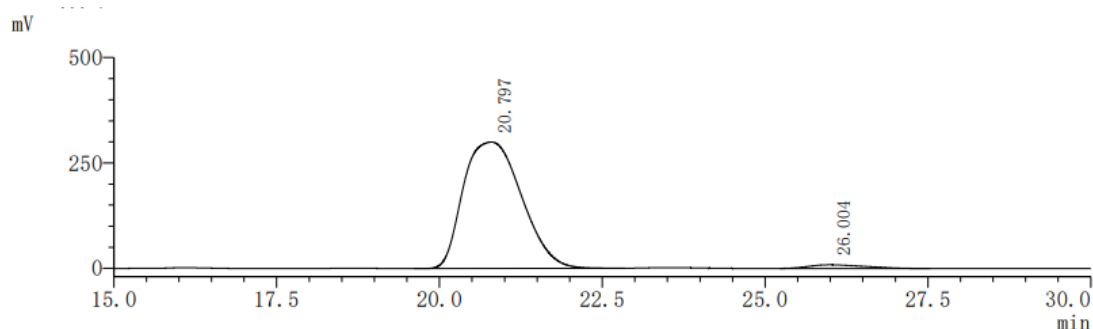

| Peak | PetTime | Type | Width(min) | Area     | Hight  | Area%   |
|------|---------|------|------------|----------|--------|---------|
| 1    | 20.797  | M    | 1.5537     | 18645301 | 299815 | 97.3245 |
| 2    | 26.004  | M    | 1.6277     | 512572   | 8671   | 2.6755  |

**(S)-benzofuran-5-yl 2-(2-(tert-butyl)-4-(furan-3-yl)-6-methylphenoxy)-3-formylbenzoate (3mr)**

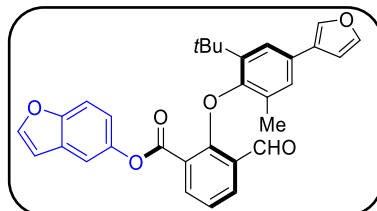

The title compound **3mr** was prepared under the optimized conditions and purified by preparative TLC (hexane : ethyl acetate = 10: 1). **3mr** was obtained as a yellow oil (38.5 mg, 78%). **<sup>1</sup>H NMR (500 MHz, Chloroform-*d*)**  $\delta$  9.99 (s, 1H), 8.08 – 8.06 (m, 1H), 8.06 – 8.04 (m, 1H), 7.70 (t, *J* = 1.3 Hz, 1H), 7.61 (d, *J* = 2.2 Hz, 1H), 7.49 (t, *J* = 1.7 Hz, 1H), 7.42 (d, *J* = 8.8 Hz, 1H), 7.40 (d, *J* = 2.3 Hz, 1H), 7.26 (td, *J* = 7.7, 0.9 Hz, 1H), 7.18 (d, *J* = 2.2 Hz, 1H), 7.16 (d, *J* = 2.4 Hz, 1H), 6.93 (dd, *J* = 8.8, 2.4 Hz, 1H), 6.68 (dd, *J* = 1.8, 0.9 Hz, 1H), 6.60 (dd, *J* = 2.2, 0.9 Hz, 1H), 2.02 (s, 3H), 1.47 (s, 9H). **<sup>13</sup>C NMR (150 MHz, Chloroform-*d*)**  $\delta$  164.75, 157.72, 154.09, 152.61, 146.32, 146.02, 143.75, 141.54, 138.44, 137.14, 133.04, 129.35, 128.32, 128.05, 127.89, 127.18, 126.00, 123.90, 123.19, 122.28, 117.80, 113.74, 111.79, 108.92, 106.84, 35.47, 30.39, 17.91.

**HRMS (ESI-TOF) (m/z):** Calcd for C<sub>31</sub>H<sub>26</sub>NaO<sub>6</sub>, ([M + Na]<sup>+</sup>), 517.1622; found 517.1623.

**[ $\alpha$ ]<sub>D</sub><sup>19</sup>** = -27.5 (*c* = 1.93, CH<sub>2</sub>Cl<sub>2</sub>).

**HPLC analysis:** Daicel Chiralpak AD-3 column (97:3 hexane: 2-propanol, 1 mL/min, 25 °C, 254 nm); *t<sub>R</sub>* (major) = 21.37 min, *t<sub>R</sub>* (minor) = 28.36 min, 93% ee.

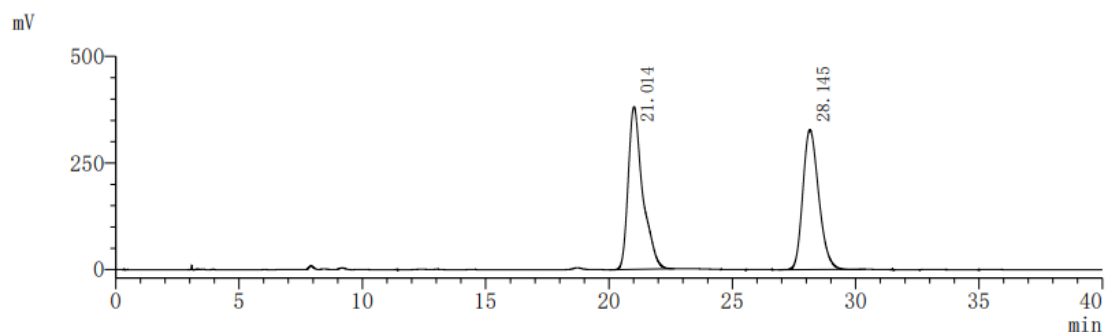

| Peak | PetTime | Type | Width(min) | Area     | Hight  | Area%   |
|------|---------|------|------------|----------|--------|---------|
| 1    | 21.014  | M    | 0.9792     | 15569946 | 381285 | 51.4491 |
| 2    | 28.145  | M    | 1.1804     | 14692846 | 327637 | 48.5509 |

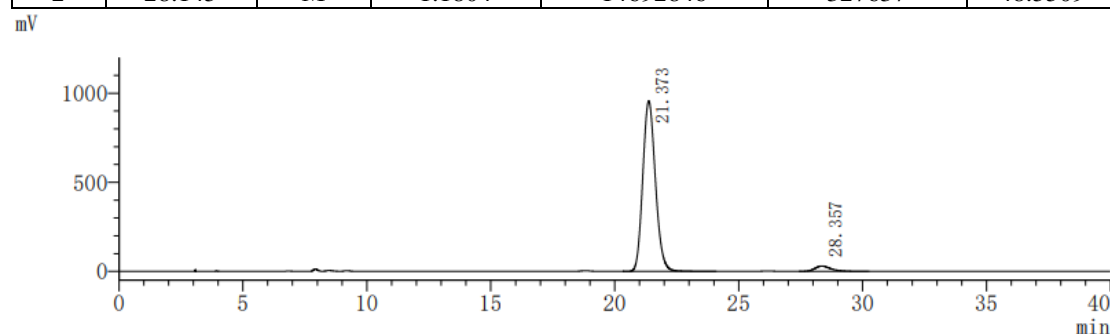

| Peak | PetTime | Type | Width(min) | Area     | Hight  | Area%   |
|------|---------|------|------------|----------|--------|---------|
| 1    | 21.373  | M    | 0.9303     | 33964964 | 956402 | 96.2699 |
| 2    | 28.357  | M    | 1.1372     | 1316004  | 29438  | 3.7301  |

**(S)-benzofuran-5-yl 2-(2-(tert-butyl)-4,6-dimethylphenoxy)-3-formylbenzoate (3nr)**

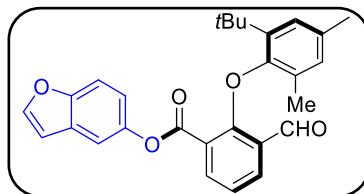

The title compound **3nr** was prepared under the optimized conditions and purified by preparative TLC (hexane : ethyl acetate = 10: 1). **3nr** was obtained as a yellow oil (29.6 mg, 67%). **<sup>1</sup>H NMR (500 MHz, Chloroform-*d*)**  $\delta$  9.72 (s, 1H), 8.06 (dd, *J* = 7.6, 1.9 Hz, 1H), 8.01 (dd, *J* = 7.8, 1.9 Hz, 1H), 7.64 (d, *J* = 2.2 Hz, 1H), 7.47 (d, *J* = 8.8 Hz, 1H), 7.26 (d, *J* = 2.4 Hz, 1H), 7.23 (t, *J* = 7.7 Hz, 1H), 7.07 (d, *J* = 2.2 Hz, 1H), 6.97 (dd, *J* = 8.8, 2.4 Hz, 1H), 6.87 – 6.85 (m, 1H), 6.74 (d, *J* = 2.2 Hz, 1H), 2.31 (s, 3H), 1.95 (s, 3H), 1.43 (s, 9H). **<sup>13</sup>C NMR (150 MHz, Chloroform-*d*)**  $\delta$  188.12, 165.04, 158.04, 153.18, 152.64, 146.35, 146.17, 140.60, 137.03, 134.67, 133.16, 131.47, 128.05, 127.20, 127.12, 126.96, 123.31, 121.96, 117.96, 113.71, 111.80, 106.88, 35.23, 30.41, 21.07, 17.59.

**HRMS** (ESI-TOF) (*m/z*): Calcd for C<sub>28</sub>H<sub>26</sub>NaO<sub>5</sub>, ([M + Na]<sup>+</sup>), 465.1672; found 465.1679.

**$[\alpha]_D^{20}$**  = -39.1 (*c* = 1.48, CH<sub>2</sub>Cl<sub>2</sub>).

**HPLC analysis:** Daicel Chiralpak AD-3 column (99:1 hexane: 2-propanol, 1 mL/min, 25 °C, 254 nm); *t<sub>R</sub>* (minor) = 16.59 min, *t<sub>R</sub>* (major) = 21.81 min, 95% ee.

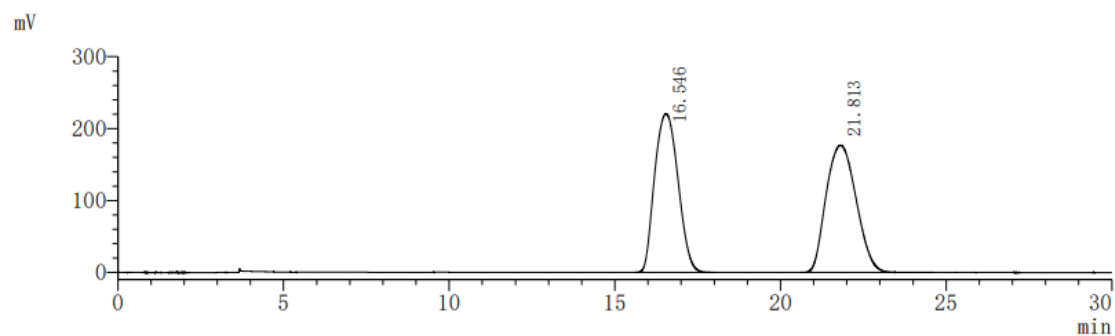

| Peak | PetTime | Type | Width(min) | Area     | Hight  | Area%   |
|------|---------|------|------------|----------|--------|---------|
| 1    | 16.546  | M    | 1.2894     | 10836195 | 220441 | 49.2268 |
| 2    | 21.813  | M    | 1.6927     | 11176591 | 176885 | 50.7732 |

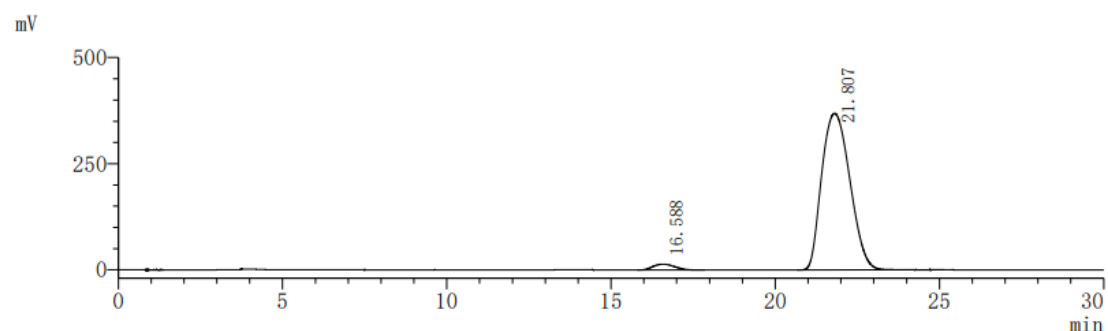

| Peak | PetTime | Type | Width(min) | Area     | Hight  | Area%   |
|------|---------|------|------------|----------|--------|---------|
| 1    | 16.588  | M    | 1.2188     | 625905   | 13698  | 2.7603  |
| 2    | 21.807  | M    | 1.5785     | 22049377 | 368898 | 97.2397 |

**(S)-benzofuran-5-yl 2-(2-bromo-6-(tert-butyl)-4-methylphenoxy)-3-formylbenzoate (3or)**

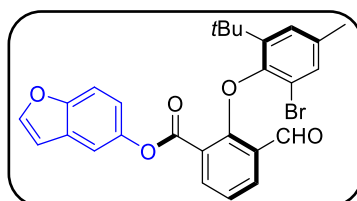

The title compound **3or** was prepared under the optimized conditions and purified by preparative TLC (hexane : ethyl acetate = 10: 1). **3or** was obtained as a yellow oil (32.9 mg, 65%). **<sup>1</sup>H NMR (500 MHz, Chloroform-*d*)**  $\delta$  9.92 (s, 1H), 8.14 (dd, *J* = 7.6, 1.9 Hz, 1H), 8.07 (dd, *J* = 7.8, 1.9 Hz, 1H), 7.64 (d, *J* = 2.2 Hz, 1H), 7.46 (dt, *J* = 8.8, 0.7 Hz, 1H), 7.28 (td, *J* = 7.7, 0.9 Hz, 1H), 7.24 (t, *J* = 2.1 Hz, 2H), 7.16 (d, *J* = 2.1 Hz, 1H), 6.95 (dd, *J* = 8.8, 2.4 Hz, 1H), 6.73 (dd, *J* = 2.2, 0.9 Hz, 1H), 2.31 (s, 3H), 1.43 (s, 9H). **<sup>13</sup>C NMR (150 MHz, Chloroform-*d*)**  $\delta$  187.94, 164.34, 157.38, 152.62, 150.99, 146.32, 146.18, 142.96, 137.34, 135.88, 133.05 (d, *J* = 3.0 Hz), 128.49, 128.02, 127.50, 123.56, 122.60, 117.95, 113.66, 112.81, 111.77, 106.86, 35.83, 30.25, 20.82.

**HRMS (ESI-TOF)** (*m/z*): Calcd for C<sub>27</sub>H<sub>23</sub>BrNaO<sub>5</sub>, ([M + Na]<sup>+</sup>), 529.0621; found 529.0618.

**[ $\alpha$ ]<sub>D</sub><sup>20</sup>** = -23.7 (*c* = 1.64, CH<sub>2</sub>Cl<sub>2</sub>).

**HPLC analysis:** Daicel Chiralpak IG column (99:1 hexane: 2-propanol, 1 mL/min, 25 °C, 254 nm); *t<sub>R</sub>* (minor) = 22.32 min, *t<sub>R</sub>* (major) = 27.37 min, 99% ee.

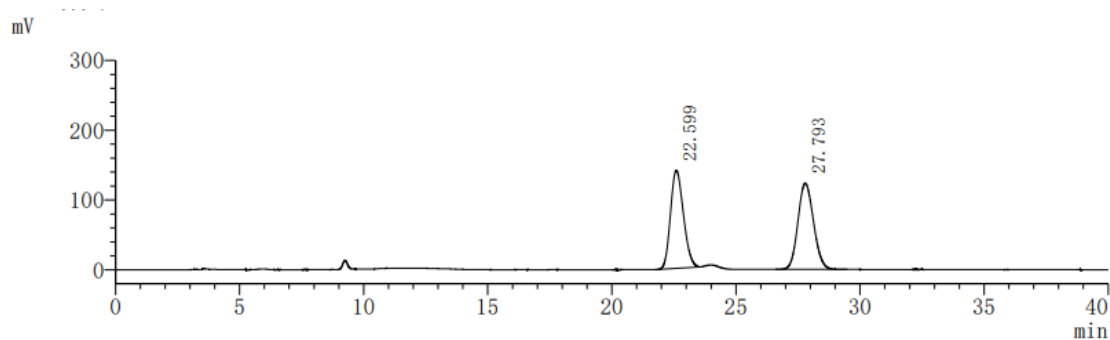

| Peak | PetTime | Type | Width(min) | Area    | Hight  | Area%   |
|------|---------|------|------------|---------|--------|---------|
| 1    | 22.599  | M    | 0.9638     | 5081254 | 140435 | 48.4866 |
| 2    | 27.793  | M    | 1.1522     | 5398454 | 123435 | 51.5134 |

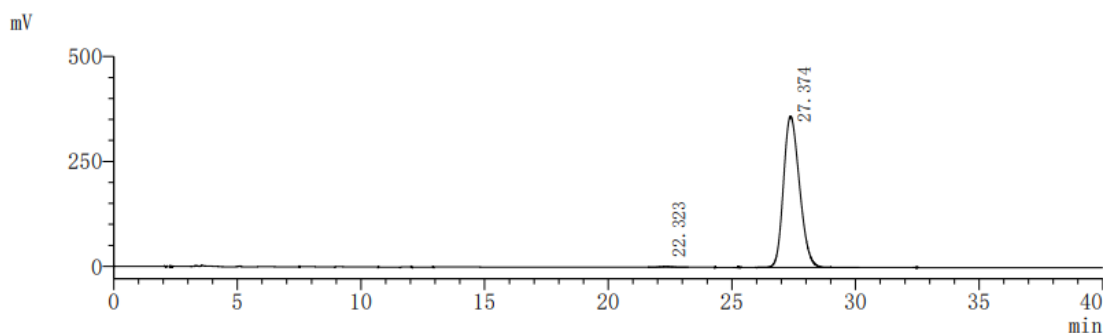

| Peak | PetTime | Type | Width(min) | Area     | Hight  | Area%   |
|------|---------|------|------------|----------|--------|---------|
| 1    | 22.323  | M    | 1.0339     | 78424    | 2071   | 0.4812  |
| 2    | 27.374  | M    | 1.1930     | 16219228 | 359831 | 99.5188 |

**(S)-benzofuran-5-yl 2-((3,5-di-tert-butyl-[1,1'-biphenyl]-2-yl)oxy)-3-formylbenzoate (3pr)**

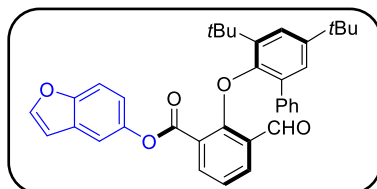

The title compound **3pr** was prepared under the optimized conditions and purified by preparative TLC (hexane : ethyl acetate = 10: 1). **3pr** was obtained as a yellow oil (24.6 mg, 45%). **<sup>1</sup>H NMR (500 MHz, Chloroform-*d*)**  $\delta$  9.81 (s, 1H), 7.79 (dd, *J* = 7.6, 1.9 Hz, 1H), 7.70 (dd, *J* = 7.7, 1.9 Hz, 1H), 7.67 (d, *J* = 2.2 Hz, 1H), 7.50 (d, *J* = 8.8 Hz, 1H), 7.48 (d, *J* = 2.5 Hz, 1H), 7.28 (d, *J* = 2.4 Hz, 1H), 7.21 (d, *J* = 6.8 Hz, 2H), 7.13 (d, *J* = 2.5 Hz, 1H), 7.10 (dd, *J* = 8.0, 6.6 Hz, 2H), 7.07 – 7.02 (m, 1H), 6.95 (dd, *J* = 8.8, 2.4 Hz, 1H), 6.88 (td, *J* = 7.7, 0.8 Hz, 1H), 6.77 (dd, *J* = 2.2, 0.9 Hz, 1H), 1.53 (s, 9H), 1.36 (s, 9H). **<sup>13</sup>C NMR (150 MHz, Chloroform-*d*)**  $\delta$  188.04, 164.08, 158.25, 152.66, 152.57, 147.44, 146.36, 146.18, 140.32, 138.41, 137.26, 132.96, 130.97, 129.39, 128.11, 127.97, 127.71, 127.45, 127.10, 124.77, 122.77, 121.73, 118.10, 113.68, 111.88, 106.87, 35.81, 34.76, 31.58, 30.52.

**HRMS (ESI-TOF)** (*m/z*): Calcd for C<sub>33</sub>H<sub>28</sub>NaO<sub>5</sub>, ([M + Na]<sup>+</sup>), 569.2298; found 569.2298.

**[ $\alpha$ ]<sub>D</sub><sup>20</sup>** = -31.8 (*c* = 1.22, CH<sub>2</sub>Cl<sub>2</sub>).

**HPLC analysis:** Daicel Chiralpak AD-3 column (97:3 hexane: 2-propanol, 1 mL/min, 25 °C, 254 nm); *t<sub>R</sub>* (minor) = 23.54 min, *t<sub>R</sub>* (major) = 34.41 min, 77% ee.

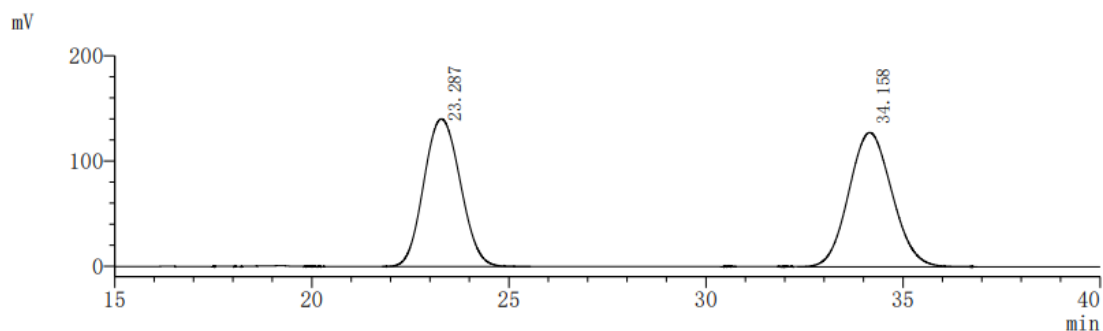

| Peak | PetTime | Type | Width(min) | Area    | Hight  | Area%   |
|------|---------|------|------------|---------|--------|---------|
| 1    | 23.287  | M    | 1.7055     | 9040823 | 140295 | 48.2107 |
| 2    | 34.158  | M    | 2.0296     | 9711913 | 127558 | 51.7893 |

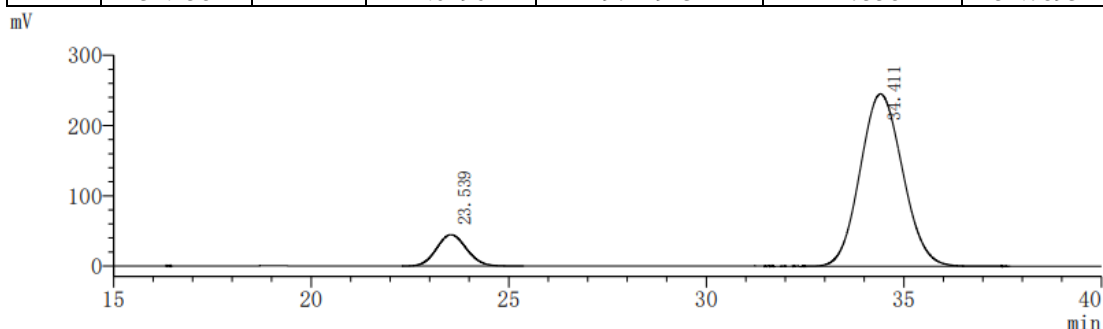

| Peak | PetTime | Type | Width(min) | Area     | Hight  | Area%   |
|------|---------|------|------------|----------|--------|---------|
| 1    | 23.539  | M    | 1.3942     | 2358401  | 44607  | 11.3896 |
| 2    | 34.411  | M    | 1.9960     | 18348300 | 245229 | 88.6104 |

### III Synthetic Applications

#### 3.1 Gram-scale synthesis:

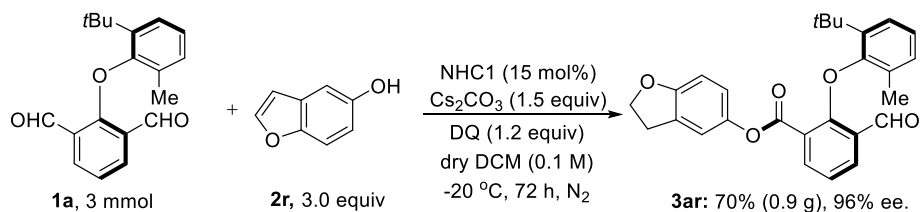

To a flame-dried 100 mL Schlenk reaction tube equipped with a magnetic stir bar, was added the **NHC-1** (15 mol%, 0.188 g),  $\text{Cs}_2\text{CO}_3$  (1.5 equiv, 1.466 g), 2-(2-(tert-butyl)-6-methylphenoxy)isophthalaldehyde **1a** (0.1 mmol, 0.888 g), and anhydrous dichloromethane (30 mL). The mixture was stirred for 5 minutes, followed by the addition of benzofuran-5-ol **2r** (3.0 equiv, 1.2 mg) and 3,3',5,5'-tetra-*tert*-butyldiphenylquinone (1.2 equiv, 1.471 g). Then the tube was sealed with a Thermo Scientific PTFE screw cap equipped with a septum, removed from the glovebox. The reaction mixture was stirred at -20 °C for 72 h. The mixture was concentrated under reduced pressure and purified by *via* column chromatography on silica gel (hexanes/EtOAc = 10:1) to afford 0.9 g product **3ar** in 70% yield with 96% ee.

#### 3.2 Synthetic Transformation

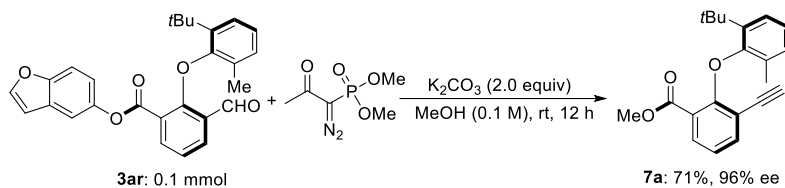

To a solution of **3ar** (0.1 mmol, 43 mg) in 1.0 mL MeOH was added  $K_2CO_3$  (0.2 mmol, 27.6 mg), P-(1-diazo-2-oxopropyl)-dimethylester (0.15 mmol, 22.5  $\mu$ L) is slowly added. the reaction mixture was stirred at rt for 12 h, until the reaction was complete as indicated by TLC. The reaction mixture was then quenched with water, extracted with  $CH_2Cl_2$  (3 $\times$ 5 mL). Drying ( $Na_2SO_4$ ) and evaporation of the solvent gave a residue that was purified by silica gel column chromatography (PE : EA = 10 : 1) to give the desired **7a** (yield: 71 %, 96% ee).  **$^1H$  NMR (500 MHz, Chloroform-*d*)**  $\delta$  7.71 (dd,  $J$  = 7.7, 1.8 Hz, 1H), 7.48 (dd,  $J$  = 7.7, 1.8 Hz, 1H), 7.16 (dd,  $J$  = 7.9, 1.8 Hz, 1H), 7.02 (t,  $J$  = 7.6 Hz, 1H), 6.99 (t,  $J$  = 7.7 Hz, 1H), 6.92 (dd,  $J$  = 6.3, 1.4 Hz, 1H), 3.82 (s, 3H), 2.74 (s, 1H), 1.94 (s, 3H), 1.40 (s, 9H).  **$^{13}C$  NMR (150 MHz, Chloroform-*d*)**  $\delta$  167.12, 156.39, 153.20, 142.10, 139.01, 131.76, 130.22, 128.74, 124.46, 124.41, 123.11, 121.09, 111.53, 83.18, 77.92, 52.33, 35.11, 30.47, 17.50.

**HRMS** (ESI-TOF) ( $m/z$ ): Calcd for  $C_{21}H_{22}NaO_3$ , ( $[M + Na]^+$ ), 345.1461; found 345.1462.

**$[\alpha]_D^{19}$**  = -29.7 ( $c$  = 1.1,  $CH_2Cl_2$ ).

**HPLC analysis:** Daicel Chiralpak OD-3 column (99:1 hexane: 2-propanol, 1.0 mL/min, 25  $^{\circ}C$ , 254 nm);  $t_R$  (major) = 4.77 min,  $t_R$  (minor) = 5.42 min, 96% ee.

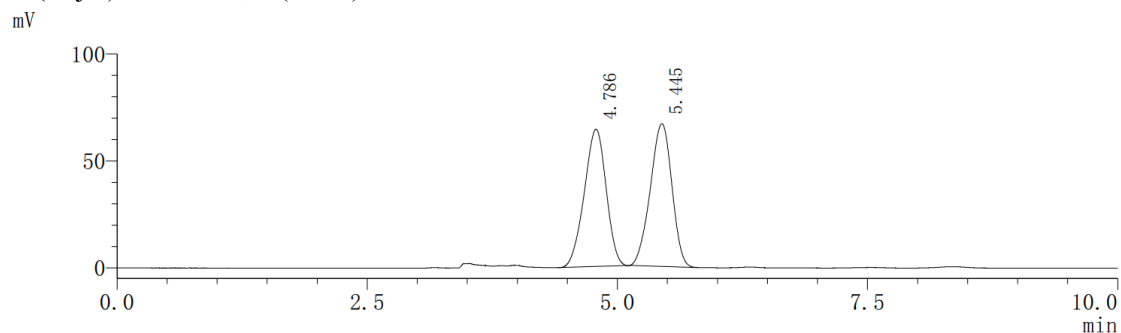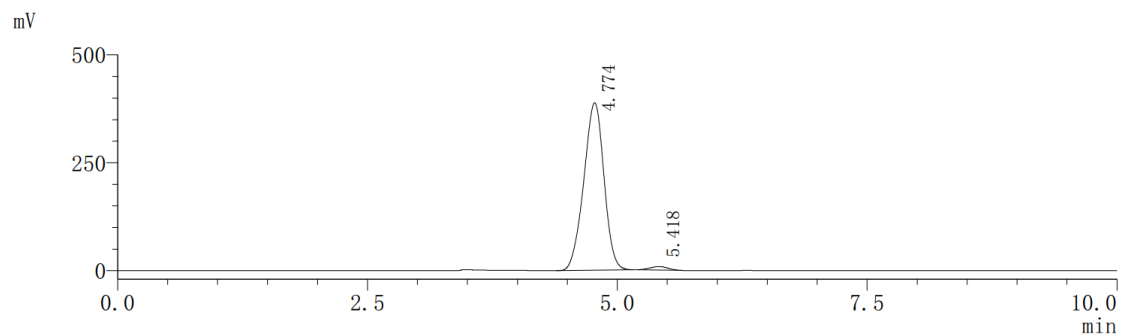

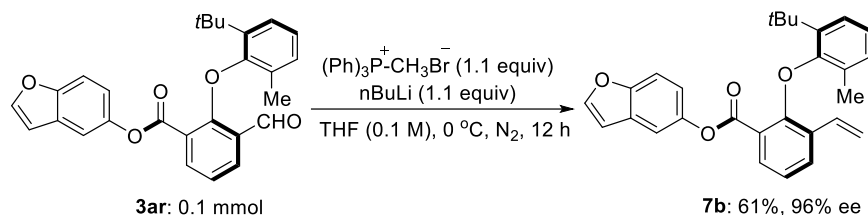

In a nitrogen-filled glovebox, a flame-dried screw-cap reaction tube equipped with a Teflon-coated magnetic stir bar was charged with methyltriphenylphosphonium bromide (0.11 mmol, 39.3 mg), anhydrous tetrahydrofuran (0.5 mL) and nBuLi of 2.5 mol/L in hexane (0.11 mmol, 45  $\mu$ L) was added. Then the tube was sealed with a Thermo Scientific PTFE screw cap equipped with a septum, removed from the glovebox. The mixture was stirred at 0  $^{\circ}$ C for 30 minutes, followed by tetrahydrofuran solution (0.5 mL) dissolved in **3ar** (0.1 mmol, 43 mg) was added dropwise and stirring at 0  $^{\circ}$ C for 12 h, until the reaction was complete as indicated by TLC. The reaction mixture was then quenched with water, extracted with CH<sub>2</sub>Cl<sub>2</sub> (3 $\times$ 5 mL). Drying (Na<sub>2</sub>SO<sub>4</sub>) and evaporation of the solvent gave a residue that was purified by silica gel column chromatography (PE : EA = 10 : 1) to give the desired **7b** (yield: 61%, 96% ee). **<sup>1</sup>H NMR (500 MHz, Chloroform-*d*)**  $\delta$  7.76 (dd, *J* = 7.7, 1.8 Hz, 1H), 7.62 (d, *J* = 2.2 Hz, 1H), 7.59 (dd, *J* = 7.7, 1.8 Hz, 1H), 7.43 (d, *J* = 8.8 Hz, 1H), 7.23 (dd, *J* = 8.0, 1.7 Hz, 1H), 7.20 (d, *J* = 2.3 Hz, 1H), 7.14 (t, *J* = 7.7 Hz, 1H), 7.00 (t, *J* = 7.6 Hz, 1H), 6.94 (d, *J* = 7.4 Hz, 1H), 6.89 (dd, *J* = 8.8, 2.4 Hz, 1H), 6.72 (d, *J* = 2.1 Hz, 1H), 6.53 (dd, *J* = 17.3, 10.9 Hz, 1H), 5.47 (dd, *J* = 17.2, 1.4 Hz, 1H), 4.99 (dd, *J* = 10.9, 1.3 Hz, 1H), 1.90 (s, 3H), 1.43 (s, 9H). **<sup>13</sup>C NMR (150 MHz, Chloroform-*d*)**  $\delta$  165.97, 154.24, 152.55, 152.36, 146.29, 146.16, 140.43, 131.71, 131.67, 130.79, 130.16, 129.43, 128.12, 127.95, 125.39, 123.71, 122.91, 122.22, 118.15, 115.72, 113.77, 111.67, 106.88, 35.37, 30.48, 18.08.

| Peak | PetTime | Type | Width(min) | Area    | Hight  | Area%   |
|------|---------|------|------------|---------|--------|---------|
| 1    | 9.336   | M    | 0.3796     | 3151900 | 221233 | 49.3579 |
| 2    | 9.978   | M    | 0.4032     | 3233902 | 213762 | 50.6421 |

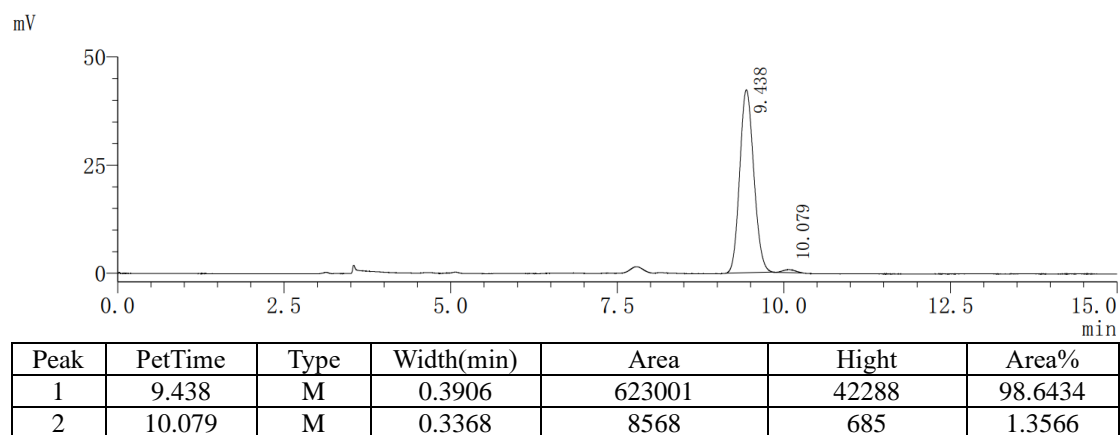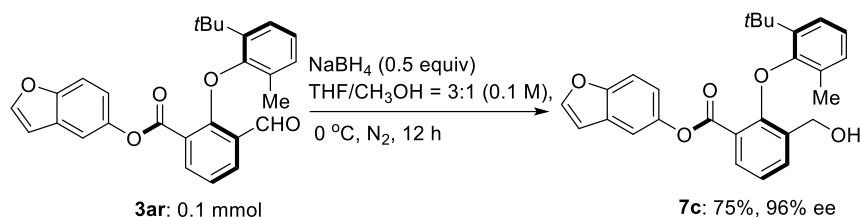

In a nitrogen-filled glovebox, a flame-dried screw-cap reaction tube equipped with a Teflon-coated magnetic stir bar was charged with **3ar** (0.1 mmol, 43 mg), NaBH<sub>4</sub> (0.05 mmol, 1.9 mg) and dry THF/CH<sub>3</sub>OH = 3:1 (1.0 mL) was added. Then the tube was sealed with a Thermo Scientific PTFE screw cap equipped with a septum, removed from the glovebox. Reaction mixture was stirred at 0 °C for 12 h, until the reaction was complete as indicated by TLC. The reaction mixture was then quenched with water, extracted with CH<sub>2</sub>Cl<sub>2</sub> (3×5 mL). Drying (Na<sub>2</sub>SO<sub>4</sub>) and evaporation of the solvent gave a residue that was purified by silica gel column chromatography (PE : EA = 10 : 1) to give the desired product **7c** as a colorless oil. (yield: 75%, 96% ee). <sup>1</sup>H NMR (500 MHz, Chloroform-*d*) δ 7.72 (dd, *J* = 7.8, 1.7 Hz, 1H), 7.69 (dd, *J* = 7.7, 1.7 Hz, 1H), 7.62 (d, *J* = 2.2 Hz, 1H), 7.40 (d, *J* = 8.8 Hz, 1H), 7.25 – 7.23 (m, 1H), 7.20 (t, *J* = 7.6 Hz, 1H), 7.07 – 7.01 (m, 3H), 6.76 (dd, *J* = 8.8, 2.3 Hz, 1H), 6.71 (d, *J* = 2.1 Hz, 1H), 4.64 – 4.55 (m, 2H), 1.94 (s, 3H), 1.42 (s, 9H). <sup>13</sup>C NMR (150 MHz, Chloroform-*d*) δ 165.58, 153.94, 152.56, 152.53, 146.15, 146.10, 140.89, 132.63, 131.25, 130.58, 130.51, 127.87, 127.51, 125.91, 124.08, 122.34, 122.03, 118.04, 113.70, 111.58, 106.85, 60.80, 35.49, 30.56, 18.08.

**HRMS** (ESI-TOF) (*m/z*): Calcd for C<sub>27</sub>H<sub>26</sub>NaO<sub>5</sub>, ([M + Na]<sup>+</sup>), 453.1672; found 453.1672.

[α]<sub>D</sub><sup>19</sup> = -20.3 (*c* = 1.6, CH<sub>2</sub>Cl<sub>2</sub>).

**HPLC analysis:** Daicel Chiralpak AD-3 column (95:5 hexane: 2-propanol, 1.0 mL/min, 25 °C, 254 nm); *t<sub>R</sub>* (minor) = 20.77 min, *t<sub>R</sub>* (major) = 24.64 min, 96% ee.

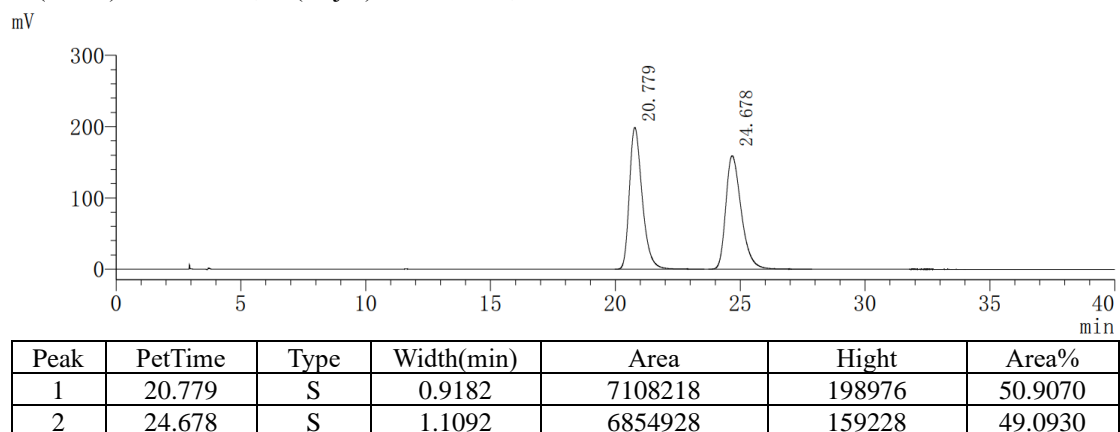

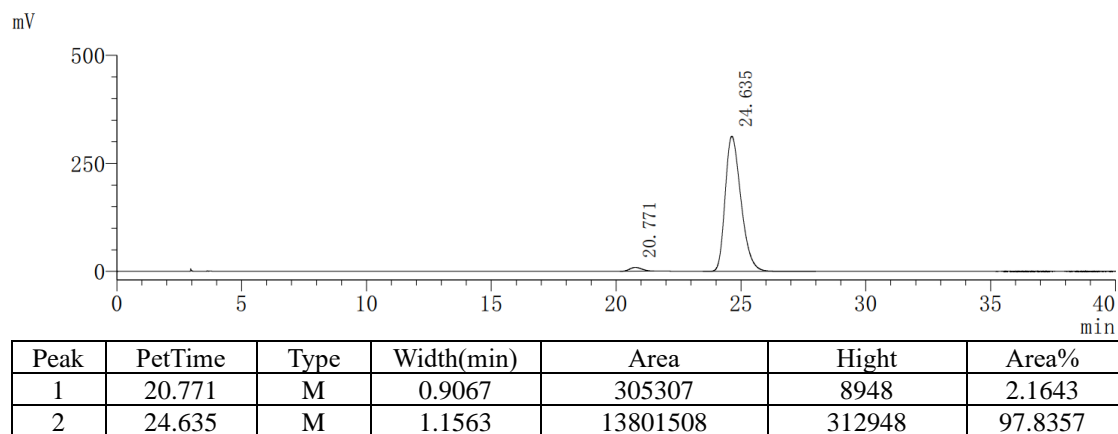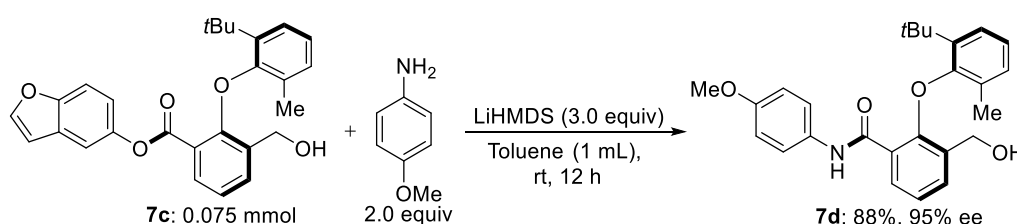

A flame-dried screw-cap reaction tube equipped with a Teflon-coated magnetic stir bar was added **7c** (32.3 mg, 0.075 mmol, 1.0 equiv), 4-methoxyaniline (18.5 mg, 2.0 equiv), toluene (1.0 mL), lithium bis(trimethylsilyl)amide (LiHMDS) 1.0 M in THF (0.225 mL, 3.0 equiv.). The reaction was allowed to come to room temperature and was stirred for 12 hours. The reaction was quenched with saturated aqueous ammonium chloride and extracted with ethyl acetate (3 x 5 mL). The combined organic layers were washed with H<sub>2</sub>O (4 x 2 mL), dried over magnesium sulfate and concentrated under reduced pressure. The obtained crude product was then purified by flash column chromatography on silica gel (eluting with petroleum ether/ether = 2/3) to provide the product **7d** (yield: 88 %, 95% ee) as a brown oil. **<sup>1</sup>H NMR (500 MHz, Chloroform-*d*)**  $\delta$  9.07 (s, 1H), 8.15 (dd, *J* = 7.8, 1.4 Hz, 1H), 7.64 (dd, *J* = 7.6, 1.9 Hz, 1H), 7.43 – 7.40 (m, 2H), 7.32 (dd, *J* = 7.9, 1.7 Hz, 1H), 7.25 (t, *J* = 7.7 Hz, 1H), 7.07 (t, *J* = 7.7 Hz, 1H), 6.99 (d, *J* = 7.3 Hz, 1H), 6.85 – 6.82 (m, 2H), 4.29 (dd, *J* = 13.8, 4.5 Hz, 1H), 4.10 (dd, *J* = 13.9, 4.4 Hz, 1H), 3.78 (s, 3H), 1.89 (s, 3H), 1.49 (s, 9H). **<sup>13</sup>C NMR (150 MHz, Chloroform-*d*)**  $\delta$  163.48, 156.49, 153.68, 151.80, 140.29, 133.51, 131.95, 131.02, 130.76, 130.19, 128.28, 126.23, 125.29, 125.02, 123.61, 122.18, 114.10, 59.99, 55.49, 35.53, 30.86, 18.16.

**HRMS (ESI-TOF) (m/z):** Calcd for C<sub>26</sub>H<sub>29</sub>NNaO<sub>4</sub>, ([M + Na]<sup>+</sup>), 442.1989; found 442.1984.

**[ $\alpha$ ]<sub>D</sub><sup>19</sup>** = -20.5 (c = 1.3, CH<sub>2</sub>Cl<sub>2</sub>).

**HPLC analysis:** Daicel Chiralpak AD-3 column (90:10 hexane: 2-propanol, 1.0 mL/min, 25 °C, 254 nm); t<sub>R</sub> (major) = 29.47 min, t<sub>R</sub> (minor) = 37.80 min, 95% ee.

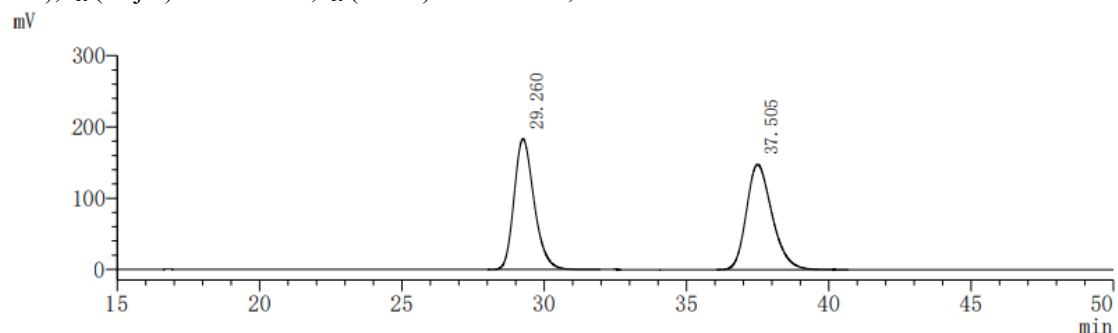

| Peak | PetTime | Type | Width(min) | Area    | Hight  | Area%   |
|------|---------|------|------------|---------|--------|---------|
| 1    | 29.260  | M    | 1.2778     | 8982133 | 183426 | 49.2623 |
| 2    | 37.505  | M    | 1.6448     | 9251143 | 147688 | 50.7377 |

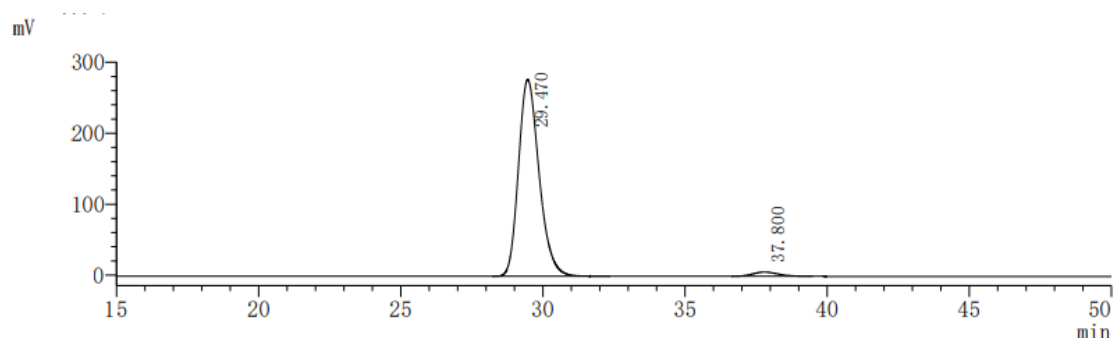

| Peak | PetTime | Type | Width(min) | Area     | Hight  | Area%   |
|------|---------|------|------------|----------|--------|---------|
| 1    | 29.470  | M    | 1.3127     | 13998315 | 277158 | 97.4112 |
| 2    | 37.800  | M    | 1.5613     | 372026   | 5984   | 2.5888  |

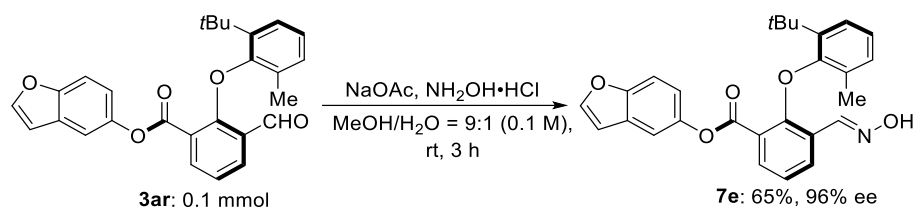

A 10 mL screw-cap test tube with a Teflon coated magnetic stir bar was added 3ar (42.8 mg, 0.10 mmol, 1.0 equiv), NaOAc (16.4 mg, 0.20 mmol, 2.0 equiv) and  $\text{NH}_2\text{OH}\cdot\text{HCl}$  (13.9 mg, 0.2 mmol, 2.0 equiv). Then MeOH (0.9 mL) and  $\text{H}_2\text{O}$  (0.1 mL) was added to the tube via a syringe. The reaction mixture was stirred at room temperature for 3 h. After the completion of the reaction, the reaction mixture was diluted with water and extracted with EA. The combined organic layers were washed with brine, dried over  $\text{Na}_2\text{SO}_4$ , filtered, and concentrated under reduced pressure. The residue was purified by silica gel column chromatography (PE/EA = 15/1) to give the product **7e** (65%, 96% ee) as colorless oil.  **$^1\text{H}$  NMR (500 MHz, Chloroform-*d*)**  $\delta$  7.94–7.90 (m, 2H), 7.82 (dd,  $J$  = 7.8, 1.8 Hz, 1H), 7.78 (s, 1H), 7.63 (d,  $J$  = 2.2 Hz, 1H), 7.46 (d,  $J$  = 8.8 Hz, 1H), 7.29 (dd,  $J$  = 8.0, 1.8 Hz, 1H), 7.25 (d,  $J$  = 2.3 Hz, 1H), 7.16 (t,  $J$  = 7.8 Hz, 1H), 7.09 (t,  $J$  = 7.6 Hz, 1H), 7.04–7.02 (m, 1H), 6.94 (dd,  $J$  = 8.8, 2.3 Hz, 1H), 6.73 (d,  $J$  = 2.2 Hz, 1H), 1.96 (s, 3H), 1.44 (s, 9H).  **$^{13}\text{C}$  NMR (150 MHz, Chloroform-*d*)**  $\delta$  165.50, 153.84, 153.77, 152.63, 146.33, 146.30, 146.22, 140.90, 133.20, 132.20, 130.65, 128.15, 128.04, 125.85, 124.69, 123.03, 122.42, 122.22, 118.08, 113.76, 111.80, 106.91, 35.36, 30.42, 17.90.

**HRMS** (ESI-TOF) ( $m/z$ ): Calcd for  $\text{C}_{27}\text{H}_{25}\text{NNaO}_5$ , ( $[\text{M} + \text{Na}]^+$ ), 466.1625; found 466.1623.

$[\alpha]_{\text{D}}^{19}$  = -14.2 ( $c$  = 1.4,  $\text{CDCl}_3$ ).

**HPLC analysis:** Daicel Chiralpak IA-3 column (95:5 hexane: 2-propanol, 1.0 mL/min, 25 °C, 254 nm);  $t_{\text{R}}$  (minor) = 14.69 min,  $t_{\text{R}}$  (major) = 16.31 min, 96% ee.

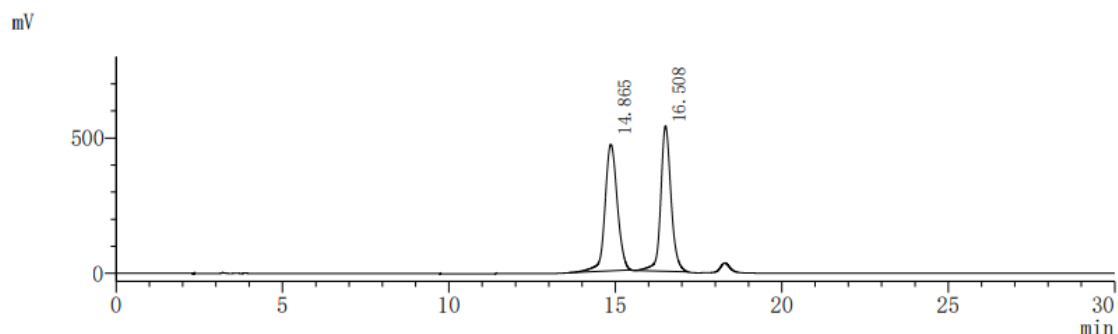

| Peak | PetTime | Type | Width(min) | Area     | Hight  | Area%   |
|------|---------|------|------------|----------|--------|---------|
| 1    | 14.865  | M    | 0.6515     | 12064261 | 466974 | 51.0393 |
| 2    | 16.508  | M    | 0.5380     | 11572927 | 535931 | 48.9607 |

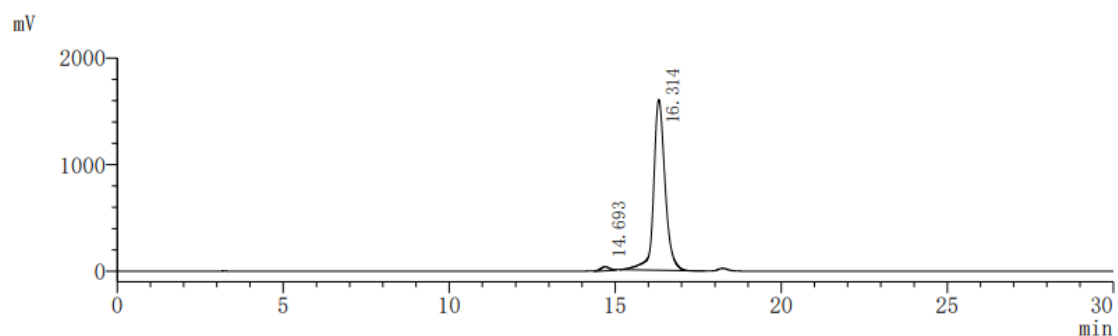

| Peak | PetTime | Type | Width(min) | Area     | Hight   | Area%   |
|------|---------|------|------------|----------|---------|---------|
| 1    | 14.693  | M    | 0.5001     | 754863   | 38118   | 1.9235  |
| 2    | 16.314  | M    | 0.5864     | 38488794 | 1601563 | 98.0765 |

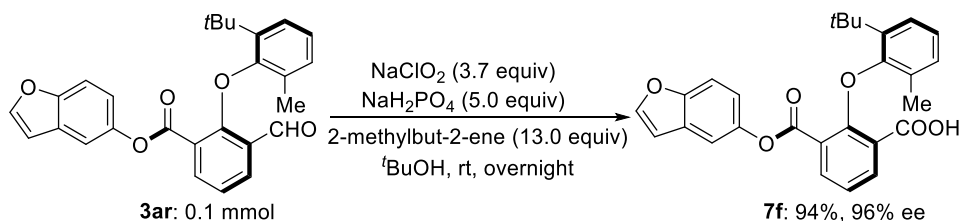

To a stirred solution of compound **3ar** (42.8 mg, 0.1 mmol) and 2-methylbut-2-ene (138  $\mu$ l, 1.3 mmol) in  $t$ BuOH (1.5 mL) were added a saturated solution of  $\text{NaClO}_2$  (41.8 mg, 0.37 mmol) and  $\text{NaH}_2\text{PO}_4$  (60.0 mg, 0.5 mmol). The mixture was stirred overnight at room temperature. The mixture was quenched with saturated  $\text{NH}_4\text{Cl}$  and extracted with EtOAc. The combined organic layers were washed with brine, dried over  $\text{Na}_2\text{SO}_4$ , filtered, concentrated, and purified by silica gel column chromatography (DCM:MeOH = 10:1) to give compound **7f** (yield: 94%, 96% ee) as a white solid.  **$^1\text{H}$  NMR (500 MHz, Methanol- $d_4$ )**  $\delta$  7.65 (d,  $J$  = 2.3 Hz, 1H), 7.47 (d,  $J$  = 7.0 Hz, 2H), 7.27 (d,  $J$  = 8.8 Hz, 1H), 7.09 – 7.03 (m, 2H), 6.92 – 6.87 (m, 2H), 6.75 (d,  $J$  = 2.4 Hz, 1H), 6.68 (d,  $J$  = 2.2 Hz, 1H), 6.47 (dd,  $J$  = 8.9, 2.4 Hz, 1H), 1.93 (s, 3H), 1.30 (s, 9H).  **$^{13}\text{C}$  NMR (150 MHz, Methanol- $d_4$ )**  $\delta$  173.89, 165.81, 153.71, 152.50, 150.66, 146.40, 145.95, 141.15, 135.05, 130.56, 130.23, 129.11, 127.73, 127.52, 125.24, 123.14, 121.42, 121.34, 117.84, 113.45, 110.67, 106.34, 35.03, 29.96, 17.33.

**HRMS** (ESI-TOF) ( $m/z$ ): Calcd for  $\text{C}_{27}\text{H}_{24}\text{NaO}_6$ , ( $[\text{M} + \text{Na}]^+$ ), 467.1465; found 467.1466.

**$[\alpha]_D^{19}$**  = -26.3 ( $c$  = 2.1,  $\text{CD}_3\text{OD}$ ).

**HPLC analysis**: Daicel Chiralpak IC-3 column (85:15 hexane: 2-propanol, 1.0 mL/min, 25  $^\circ\text{C}$ , 254 nm);  $t_R$  (major) = 5.78 min,  $t_R$  (minor) = 8.35 min, 96% ee.

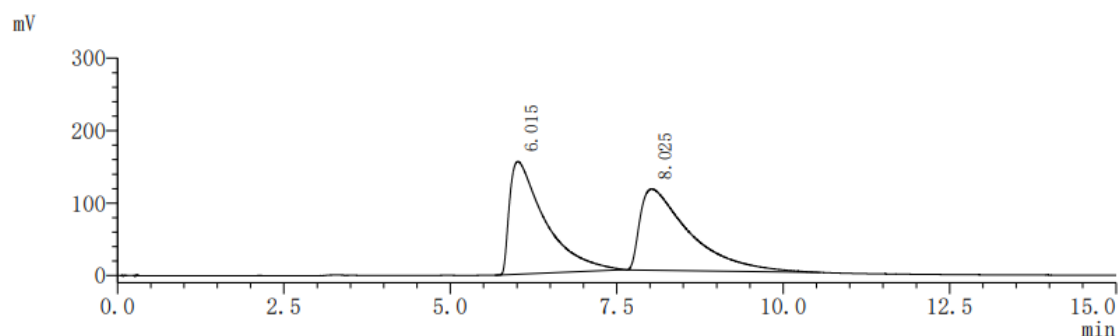

| Peak | PetTime | Type | Width(min) | Area    | Hight  | Area%   |
|------|---------|------|------------|---------|--------|---------|
| 1    | 6.015   | M    | 0.9373     | 5766282 | 155352 | 49.9353 |
| 2    | 8.025   | M    | 1.2995     | 5781229 | 111947 | 50.0647 |

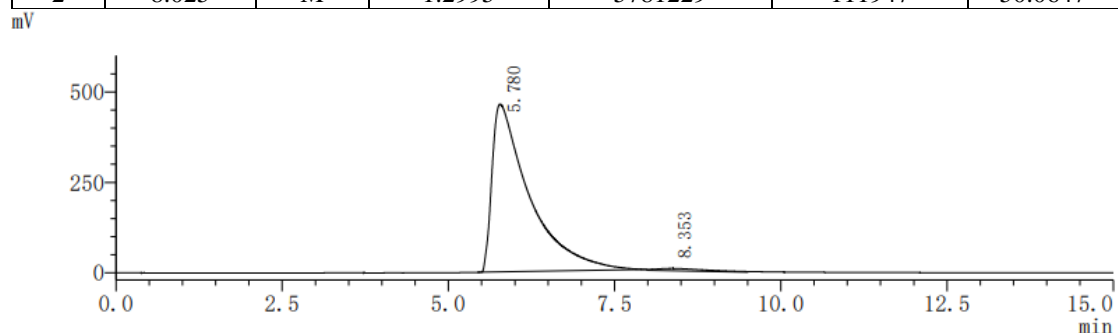

| Peak | PetTime | Type | Width(min) | Area     | Hight  | Area%   |
|------|---------|------|------------|----------|--------|---------|
| 1    | 5.780   | M    | 0.9653     | 18143467 | 463259 | 98.0811 |
| 2    | 8.353   | M    | 1.5130     | 354962   | 6496   | 1.9189  |

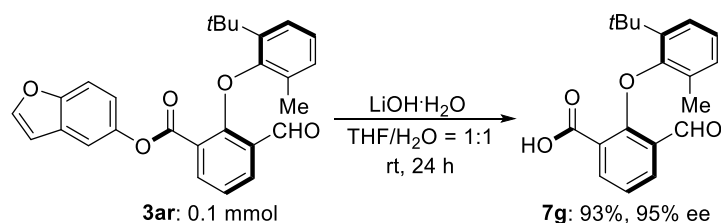

To a 1.0 mL solution of LiOH·H<sub>2</sub>O (16.8 mg, 0.4 mmol, 4.0 equiv) in THF and H<sub>2</sub>O (v/v = 1:1), **3ar** (42.8 mg, 0.1 mmol, 1.0 equiv) was added. The reaction mixture was stirred at room temperature for 24 h, until the reaction was completed as indicated by TLC. Then quenched with 1 M HCl in ice water bath, until pH = 3. The reaction mixture was diluted with water and extracted with EA. The combined organic layers were dried over Na<sub>2</sub>SO<sub>4</sub>, filtered, and concentrated under reduced pressure. The residue was purified by silica gel column chromatography (DCM/MeOH = 10/1) to give the product **7g** (93% yield, 95% ee) as pink oil. <sup>1</sup>H NMR (500 MHz, Methanol-*d*<sub>4</sub>) δ 9.26 (s, 1H), 7.60 – 7.57 (m, 2H), 7.21 (dd, J = 7.8, 1.8 Hz, 1H), 7.03 (t, J = 7.6 Hz, 1H), 6.96 (t, J = 7.6 Hz, 1H), 6.92 (d, J = 7.5 Hz, 1H), 1.84 (s, 3H), 1.36 (s, 9H). <sup>13</sup>C NMR (150 MHz, Methanol-*d*<sub>4</sub>) δ 188.24, 172.48, 156.27, 155.68, 140.41, 137.26, 133.75, 130.70, 128.07, 127.76, 126.19, 125.33, 124.50, 121.88, 34.78, 29.44, 16.47.

**HRMS** (ESI-TOF) (m/z): Calcd for C<sub>19</sub>H<sub>20</sub>NNaO<sub>4</sub>, ([M + Na]<sup>+</sup>), 335.1254; found 335.1258.

[α]<sub>D</sub><sup>19</sup> = +44.4 (c = 2.1, CD<sub>3</sub>OD).

**HPLC analysis:** Daicel Chiralpak IG column (85:15 hexane: 2-propanol, 1.0 mL/min, 25 °C, 254 nm); t<sub>R</sub> (minor) = 8.58 min, t<sub>R</sub> (major) = 11.87 min, 95% ee.

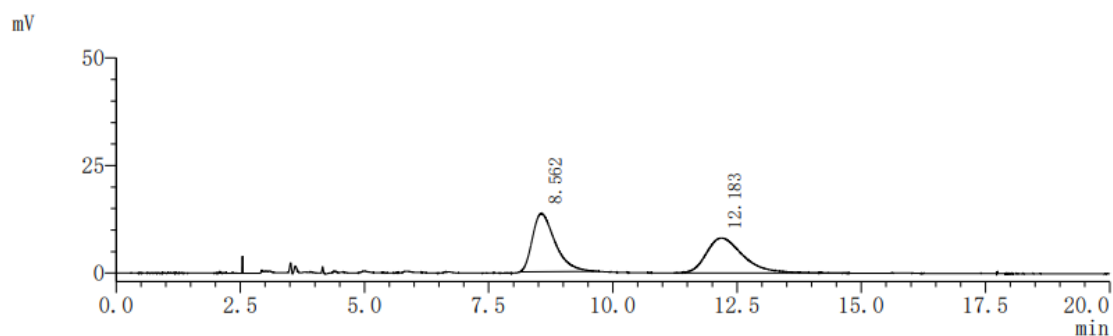

| Peak | PetTime | Type | Width(min) | Area   | Hight | Area%   |
|------|---------|------|------------|--------|-------|---------|
| 1    | 8.562   | M    | 0.8038     | 429243 | 13501 | 50.5545 |
| 2    | 12.183  | M    | 1.2547     | 419827 | 8126  | 49.4455 |

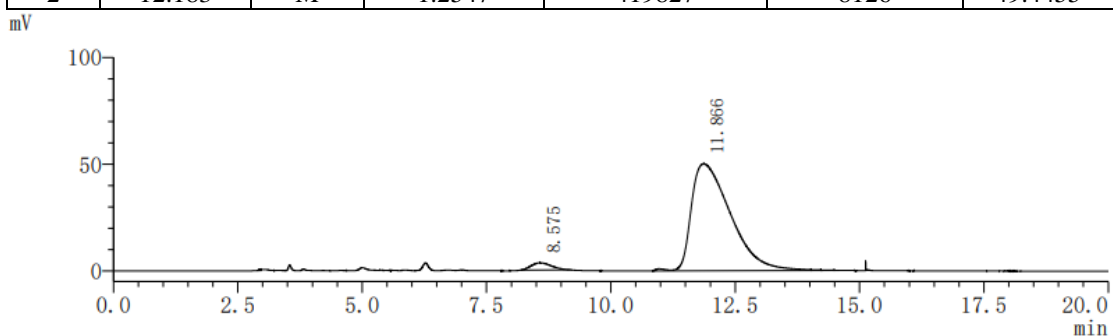

| Peak | PetTime | Type | Width(min) | Area    | Hight | Area%   |
|------|---------|------|------------|---------|-------|---------|
| 1    | 8.575   | M    | 0.7647     | 96280   | 3398  | 2.3760  |
| 2    | 11.866  | M    | 1.4112     | 2755643 | 50164 | 97.6240 |

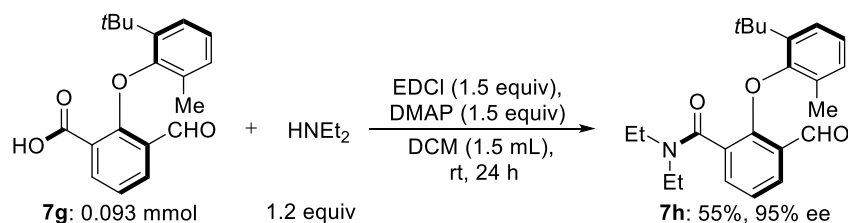

A flame-dried screw-cap reaction tube equipped with a Teflon-coated magnetic stir bar was added DMAP (17.0 mg, 0.14 mmol, 1.5 equiv), followed by DCM solution (1.5 mL) containing **7g** (29.0 mg, 0.093 mmol, 1.0 equiv) and HNEt<sub>2</sub> (12  $\mu$ L, 0.11 mmol, 1.2 equiv) was added. Then EDCI (26.7 mg, 0.14 mmol, 1.5 equiv) was added in ice water bath and the reaction mixture was stirred at room temperature for 24 h, until the reaction was completed as indicated by TLC. The reaction mixture was diluted with water and extracted with DCM. The combined organic layers were dried over Na<sub>2</sub>SO<sub>4</sub>, filtered, and concentrated under reduced pressure. The residue was purified by silica gel column chromatography (PE/EA = 2/1) to give the product **7h** (55% yield, 95% ee) as white solid. **<sup>1</sup>H NMR (500 MHz, Chloroform-*d*)**  $\delta$  9.27 (s, 1H), 7.80 (dd, *J* = 7.9, 1.8 Hz, 1H), 7.48 (dd, *J* = 7.3, 1.8 Hz, 1H), 7.23 (dd, *J* = 7.7, 1.9 Hz, 1H), 7.17 (t, *J* = 7.6 Hz, 1H), 7.02 (t, *J* = 7.6 Hz, 1H), 6.99 (dd, *J* = 7.6, 1.9 Hz, 1H), 3.93 – 3.86 (m, 1H), 3.42 – 3.35 (m, 1H), 3.30 – 3.21 (m, 2H), 1.97 (s, 3H), 1.41 (s, 9H), 1.21 (t, *J* = 7.2 Hz, 3H), 1.11 (t, *J* = 7.2 Hz, 3H). **<sup>13</sup>C NMR (150 MHz, Chloroform-*d*)**  $\delta$  187.69, 167.47, 156.52, 155.16, 139.49, 132.81, 131.61, 130.04, 129.62, 128.29, 126.44, 125.60, 125.08, 122.84, 42.86, 38.88, 35.14, 30.12, 17.52, 14.16, 12.87.

**HRMS (ESI-TOF) (m/z):** Calcd for C<sub>23</sub>H<sub>29</sub>NNaO<sub>3</sub>, ([M + Na]<sup>+</sup>), 390.2040; found 390.2040.

[ $\alpha$ ]<sub>D</sub><sup>19</sup> = +55.5 (c = 1.0, CH<sub>2</sub>Cl<sub>2</sub>).

**HPLC analysis:** Daicel Chiralpak AD-3 column (98:2 hexane: 2-propanol, 0.7 mL/min, 25 °C, 254 nm);  $t_R$  (minor) = 19.75 min,  $t_R$  (major) = 21.71 min, 95% ee.

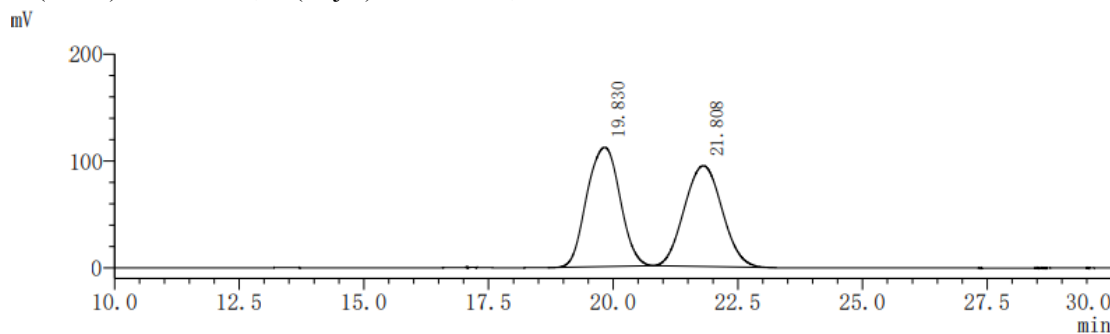

| Peak | PetTime | Type | Width(min) | Area    | Hight  | Area%   |
|------|---------|------|------------|---------|--------|---------|
| 1    | 19.830  | M    | 1.2145     | 5173256 | 111612 | 50.9641 |
| 2    | 21.808  | M    | 1.4055     | 4977522 | 94305  | 49.0359 |

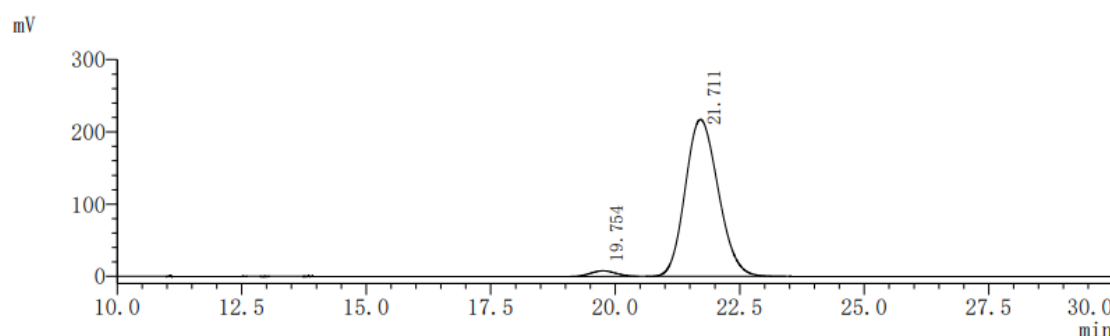

| Peak | PetTime | Type | Width(min) | Area     | Hight  | Area%   |
|------|---------|------|------------|----------|--------|---------|
| 1    | 19.754  | M    | 0.9204     | 264813   | 7625   | 2.5723  |
| 2    | 21.711  | M    | 1.2198     | 10030188 | 217209 | 97.4277 |

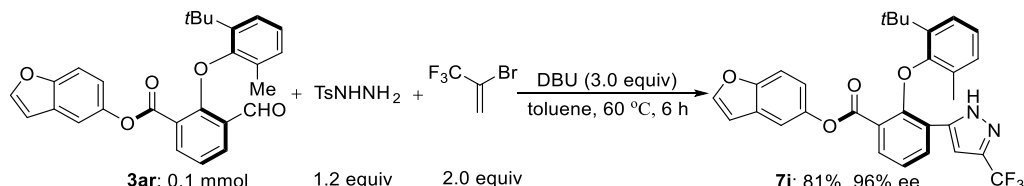

To a 10 mL round-bottom flask equipped with a magnetic stirring bar and a refluxing condenser was added aldehyde **3ar** (0.1 mmol, 42.8 mg), 4-methylbenzenesulfonohydrazide (0.12 mmol, 22.3 mg), toluene (1 mL), 1,8-diazabicyclo[5.4.0]undec-7-ene (DBU) (0.3 mmol, 45  $\mu$ L), and 2-bromo-3,3,3-trifluoropropene (0.2 mmol, 21  $\mu$ L). The resulting mixture was vigorously stirred at 60 °C for 6 h. Then the mixture was added water (2 mL), extracted with EtOAc (5 mL  $\times$ 3). The combined organic phases were dried over anhydrous  $\text{Na}_2\text{SO}_4$ , filtered and concentrated in vacuo. The obtained crude product was then purified by flash column chromatography on silica gel (eluting with petroleum ether/ethyl acetate = 2/1) to provide the product **7i** (yield: 81 %, 96% ee) as a white solid.<sup>[3]</sup>  **$^1\text{H}$  NMR (500 MHz, Chloroform-*d*)**  $\delta$  11.24 (s, 1H), 7.86 (dd,  $J$  = 7.8, 1.7 Hz, 1H), 7.66 (dd,  $J$  = 7.7, 1.7 Hz, 1H), 7.63 (d,  $J$  = 2.2 Hz, 1H), 7.38 (d,  $J$  = 8.9 Hz, 1H), 7.30 – 7.27 (m, 2H), 7.14 – 7.07 (m, 2H), 6.93 (s, 1H), 6.88 (d,  $J$  = 2.4 Hz, 1H), 6.71 (d,  $J$  = 2.2 Hz, 1H), 6.59 (dd,  $J$  = 8.8, 2.4 Hz, 1H), 1.98 (s, 3H), 1.38 (s, 9H).  **$^{13}\text{C}$  NMR (150 MHz, Chloroform-*d*)**  $\delta$  164.45, 152.52, 152.21, 151.53, 146.30, 145.67, 142.04, 141.09, 132.20, 132.01, 130.80, 128.39, 127.77, 126.80, 125.34, 122.92, 122.79, 121.26 (q,  $J$  = 267.4 Hz), 119.55, 117.70, 113.49, 111.52, 106.84, 103.19, 35.60, 31.25, 18.12.  **$^{19}\text{F}$  NMR (565 MHz, Chloroform-*d*)**  $\delta$  -62.22 (s, 1CF<sub>3</sub>).

**HRMS** (ESI-TOF) ( $m/z$ ): Calcd for  $C_{30}H_{25}F_3N_2NaO_4$ ,  $([M + Na]^+)$ , 557.1659; found 557.1647.

$[\alpha]_D^{19} = -16.4$  ( $c = 1.1$ ,  $CDCl_3$ ).

**HPLC analysis:** Daicel Chiralpak IA-3 column (95:5 hexane: 2-propanol, 1.0 mL/min, 25 °C, 254 nm);

$t_R$  (major) = 11.79 min,  $t_R$  (minor) = 13.40 min, 96% ee.

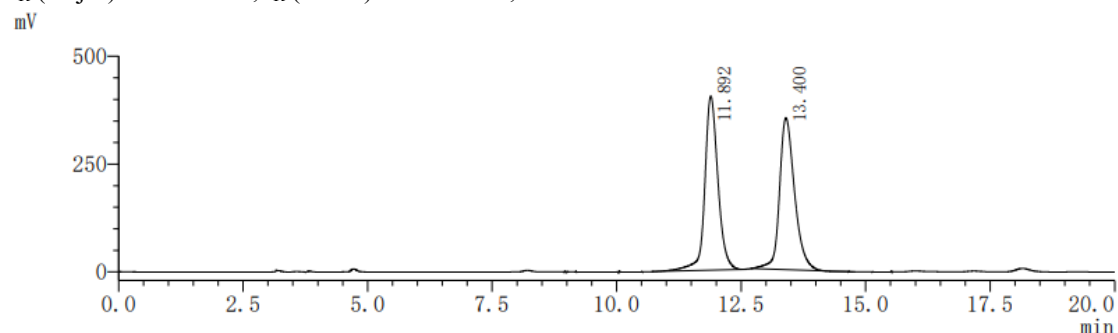

| Peak | PetTime | Type | Width(min) | Area    | Hight  | Area%   |
|------|---------|------|------------|---------|--------|---------|
| 1    | 11.892  | M    | 0.4545     | 7441338 | 403091 | 50.1204 |
| 2    | 13.400  | M    | 0.5286     | 7405602 | 351726 | 49.8796 |

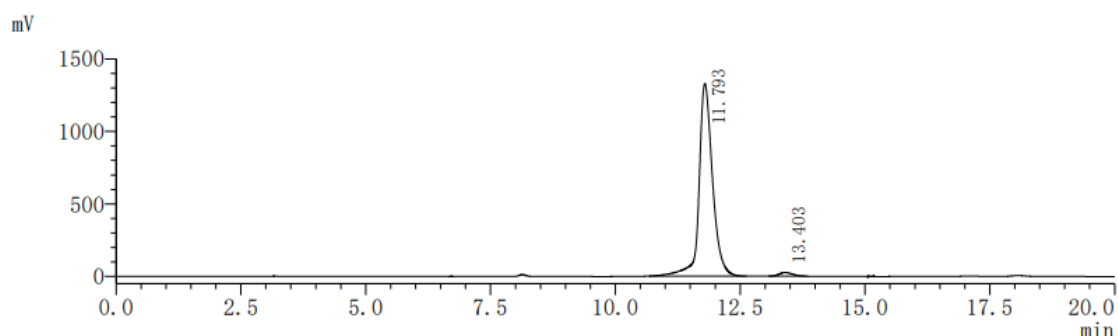

| Peak | PetTime | Type | Width(min) | Area     | Hight   | Area%   |
|------|---------|------|------------|----------|---------|---------|
| 1    | 11.793  | M    | 0.4537     | 24907171 | 1325505 | 98.1821 |
| 2    | 13.403  | M    | 0.4916     | 461182   | 25084   | 1.8179  |

## IV. Mechanistic Studies

### 4.1 Deuterium labeling experiment

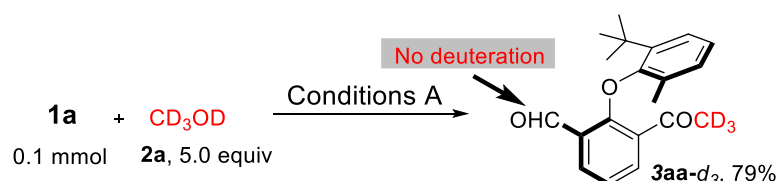

In a nitrogen-filled glovebox, a flame-dried screw-cap reaction tube equipped with a Teflon-coated magnetic stir bar was charged with **NHC-1** (15 mol%, 6.27 mg),  $\text{Cs}_2\text{CO}_3$  (49.0 mg, 1.5 equiv), and anhydrous dichloromethane (1 mL).  $\text{CD}_3\text{OD}$  **2a** (0.02 mL, 5.0 equiv) was added. The mixture was stirred for 5 minutes, followed by the addition of aldehyde 2-(naphthalen-1-yl)isophthalaldehyde **1a** (0.1 mmol, 29.6 mg) and 3,3',5,5'-tetra-*tert*-butyldiphenylquinone (48 mg, 1.2 equiv). Then the tube was sealed with a Thermo Scientific PTFE screw cap equipped with a septum, removed from the glovebox. The reaction mixture was stirred at 0 °C for 72 h. After the reaction was completed as indicated by TLC analysis, the solvent was removed under reduced pressure and the residue was purified by silica gel chromatography using petroleum ether/ethyl acetate 10:1 (v/v) to give the product **3aa-d<sub>3</sub>**.

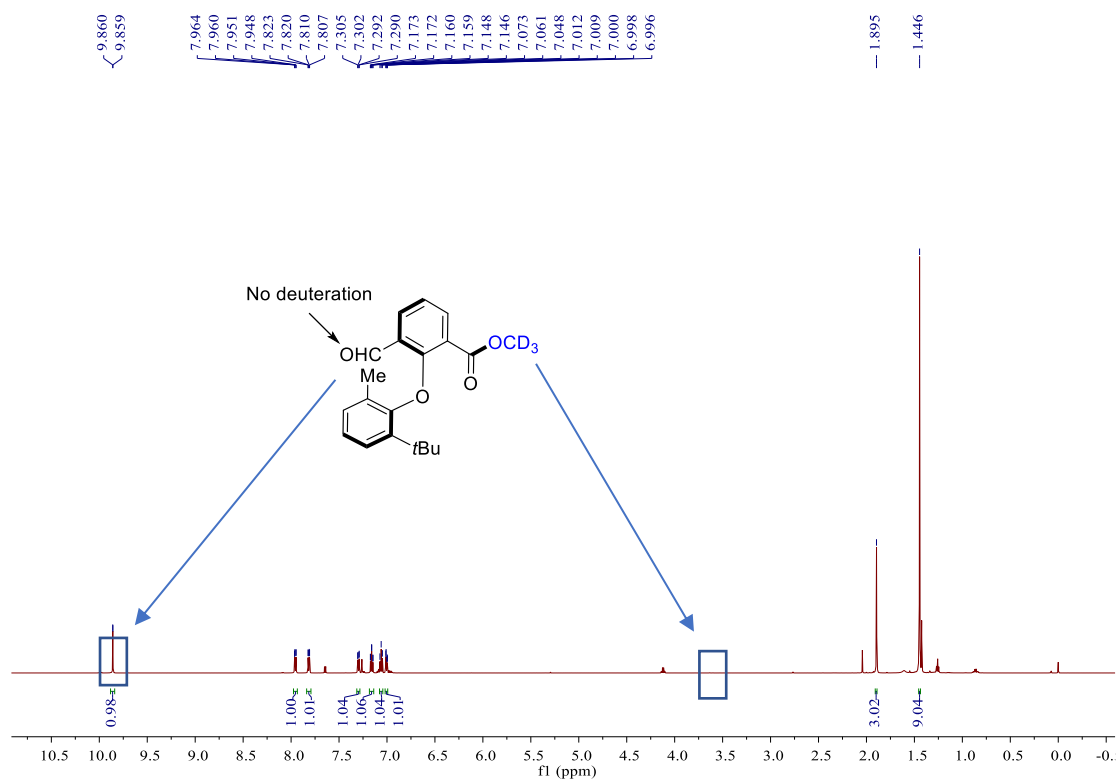

<sup>1</sup>H NMR (500 MHz, CDCl<sub>3</sub>) spectrum of 3aa-d<sub>3</sub>.

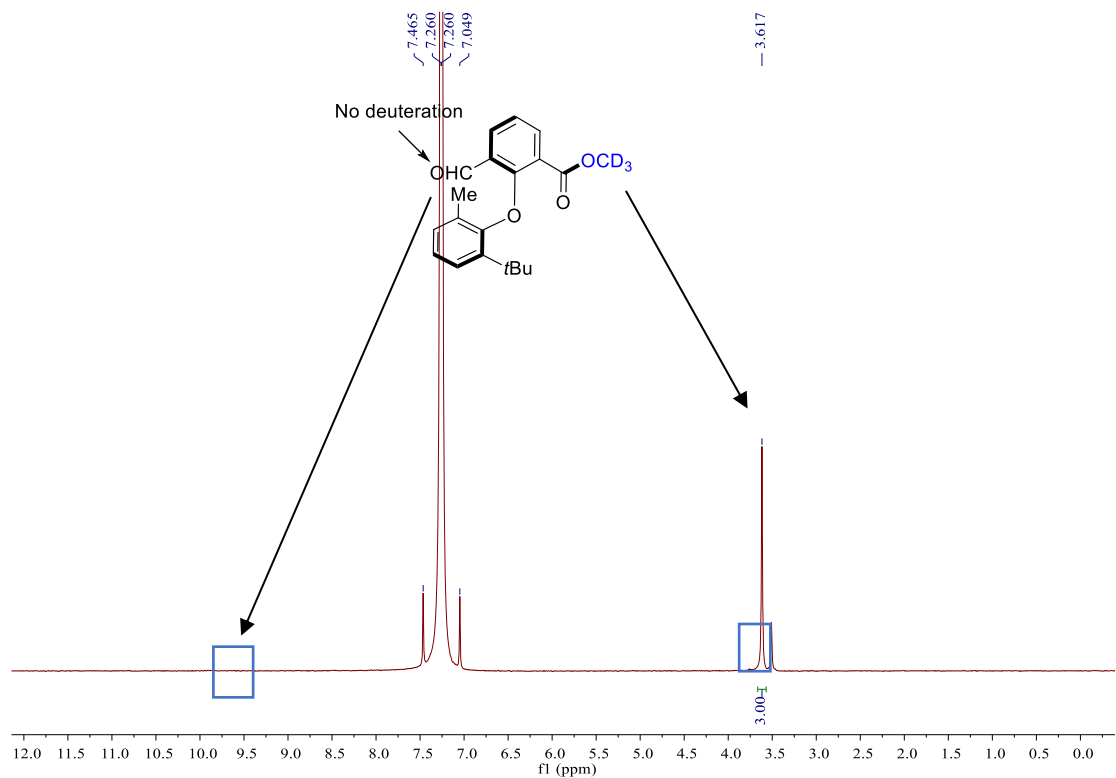

<sup>2</sup>H NMR (77 MHz, CDCl<sub>3</sub>) spectrum of 3aa-d<sub>3</sub>.

## 4.2 Parallel Kinetic Isotope Effect Experiment

### 4.2.1 Procedure for synthesis of 1a-d<sub>2</sub><sup>[4]</sup>

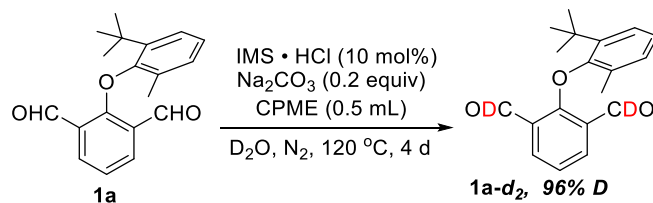

In a nitrogen-filled glovebox, a flame-dried screw-cap reaction tube equipped with a Teflon-coated magnetic stir bar was charged with aldehyde **1a** (0.5 mmol), IMes · HCl (17.0 mg, 0.05 mmol), Na<sub>2</sub>CO<sub>3</sub> (11.0 mg, 0.1 mmol), CPME (0.5 mL) and D<sub>2</sub>O (2.5 mL). Then the tube was sealed with a Thermo Scientific PTFE screw cap equipped with a septum, removed from the glovebox. The reaction mixture was stirred at 120 °C for 4 d, and extracted with AcOEt, and the organic layers were dried over MgSO<sub>4</sub>, and concentrated in vacuo. The residue was purified by silica gel column chromatography (PE : EA = 10:1), **1a-d<sub>2</sub>** was obtained in 88% yield, with 96% D. <sup>1</sup>H NMR (500 MHz, Chloroform-*d*) δ 9.97 (s, 0.08H), 8.08 (d, *J* = 7.7 Hz, 2H), 7.33 (dd, *J* = 8.0, 1.7 Hz, 1H), 7.22 (t, *J* = 7.7 Hz, 1H), 7.12 (t, *J* = 7.7 Hz, 1H), 7.05 (dd, *J* = 7.5, 1.6 Hz, 1H), 1.91 (s, 3H), 1.44 (s, 9H).

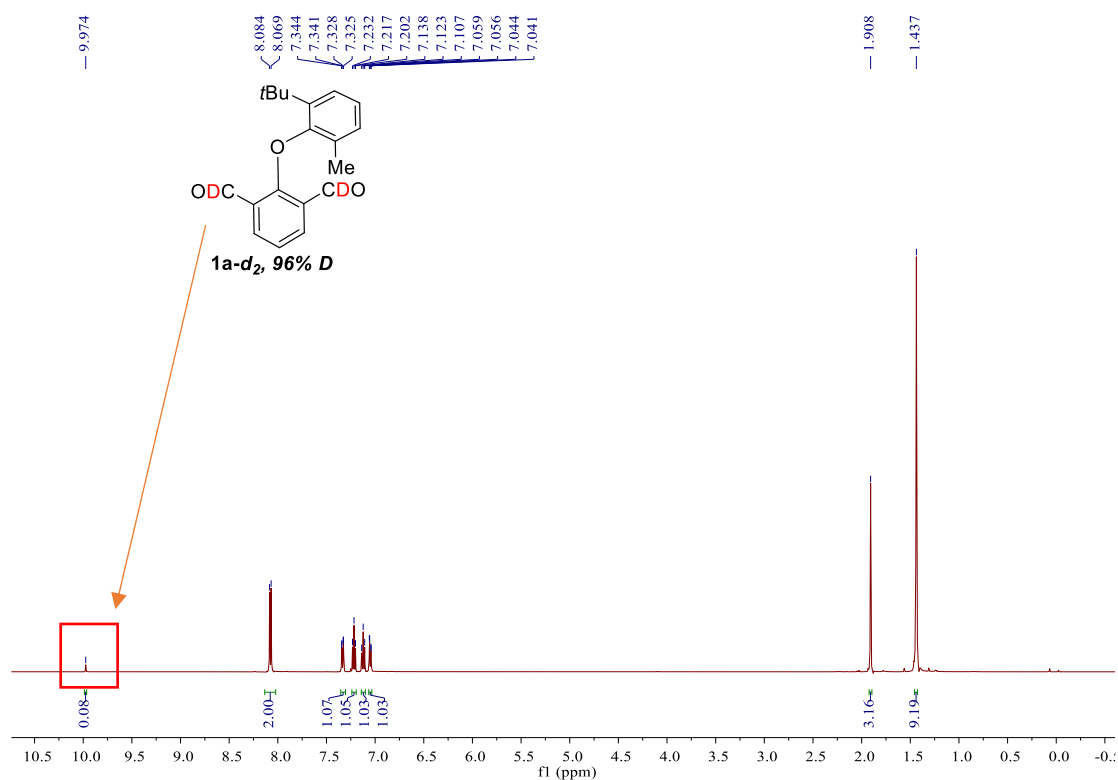

<sup>1</sup>H NMR (500 MHz, CDCl<sub>3</sub>) spectrum of **1a-d<sub>2</sub>**.

#### 4.2.2 Experiment Procedure for the Isotope Experiments

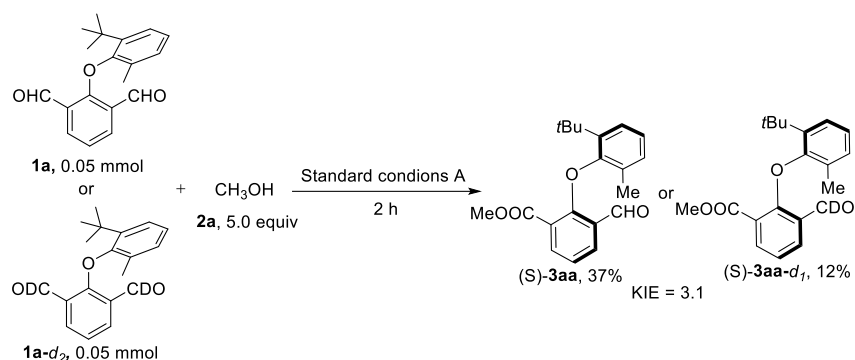

In a nitrogen-filled glovebox, two flame-dried screw-cap reaction tube equipped with a Teflon-coated magnetic stir bar was charged **NHC-1** (10 mol%, 3.1 mg), Cs<sub>2</sub>CO<sub>3</sub> (25.0 mg, 1.5 equiv), and anhydrous dichloromethane (0.5 mL). CH<sub>3</sub>OH **2a** (0.01 mL, 5.0 equiv) was added. The mixture was stirred for 5 minutes, followed by the addition of **1a** or **1a-d<sub>2</sub>** (0.05 mmol, 15 mg) and 3,3',5,5'-tetra-*tert*-butyldiphenylquinone (24 mg, 1.2 equiv). Then the tube was sealed with a Thermo Scientific PTFE screw cap equipped with a septum, removed from the glovebox. The reaction mixture was stirred at 0 °C for 2 h. After the reaction was completed as indicated by TLC analysis, the solvent was removed under reduced pressure and the residue was purified by silica gel chromatography using petroleum ether/ethyl acetate 10:1 (v/v) to give the product **S-3aa**, yield: 37%; **S-3aa-d<sub>1</sub>**, yield: 12%. The KIE was determined by <sup>1</sup>H NMR analysis to be 3.1.

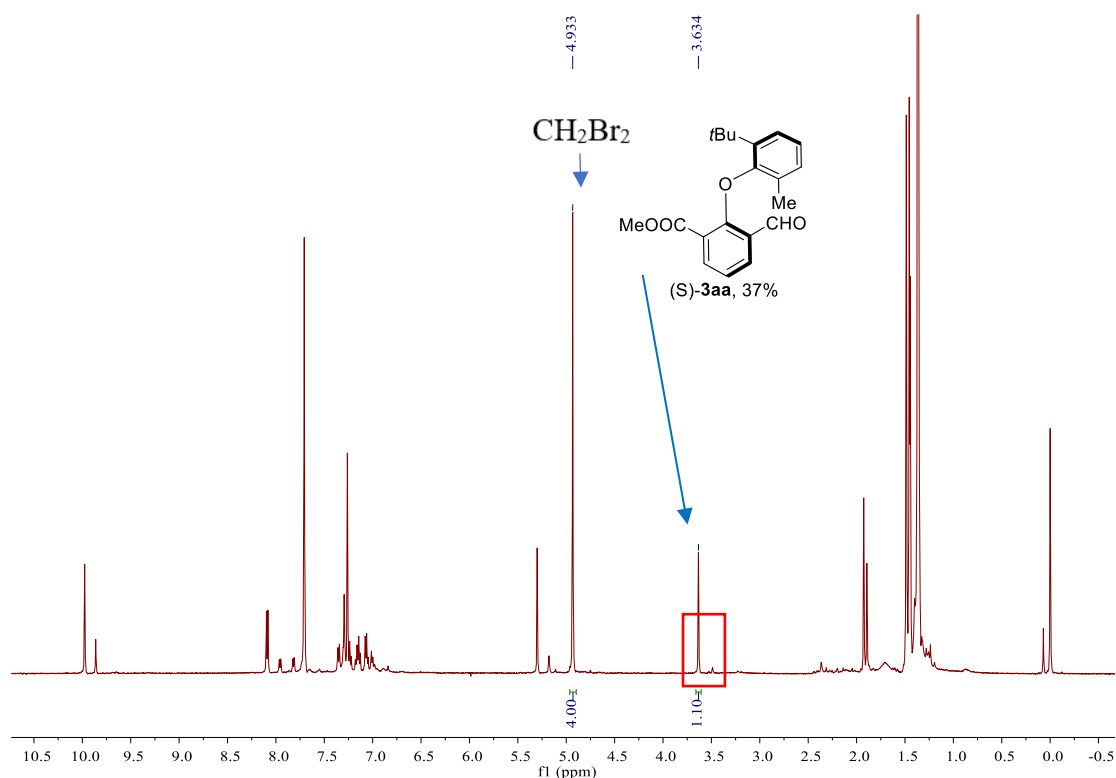

**<sup>1</sup>H NMR (500 MHz, CDCl<sub>3</sub>) using CH<sub>2</sub>Br<sub>2</sub> (0.1 mmol, 7.0 μL) as an internal standard of the reaction mixture (**S-3aa**)**

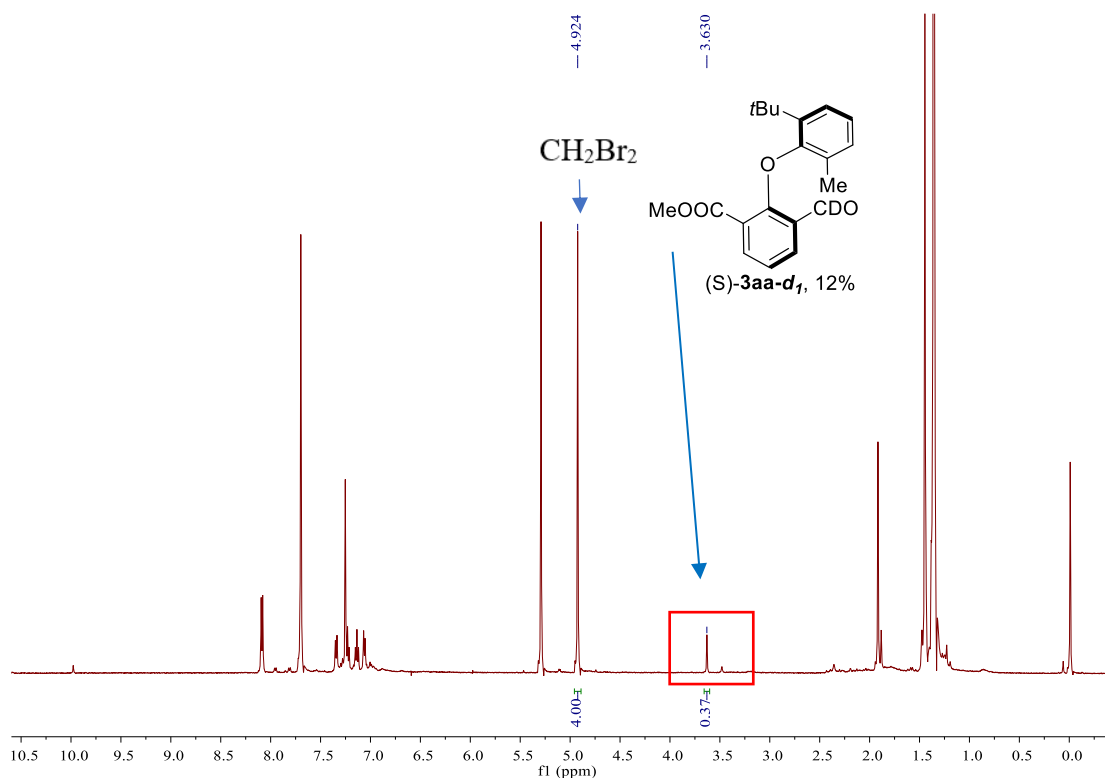

**<sup>1</sup>H NMR (500 MHz, CDCl<sub>3</sub>) using CH<sub>2</sub>Br<sub>2</sub> (0.1 mmol, 7.0 μL) as an internal standard of the reaction mixture (S-3aa-d<sub>1</sub>)**

### 4.3 Control experiment

#### 4.3.1 Procedure for NHC-catalyzed Desymmetrization of Dialdehyde **1a** with NHC-1.

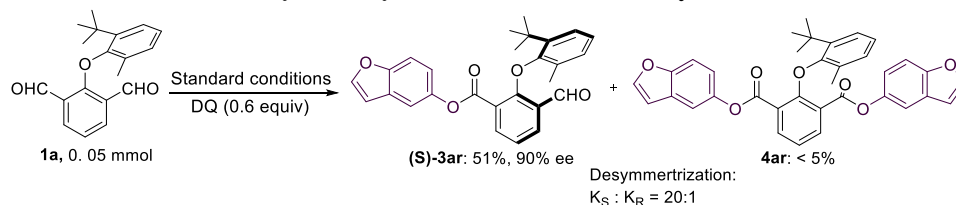

In a nitrogen-filled glovebox, a flame-dried screw-cap reaction tube equipped with a Teflon-coated magnetic stir bar was charged **NHC-1** (10 mol%, 3.1 mg), Cs<sub>2</sub>CO<sub>3</sub> (25.0 mg, 1.5 equiv), and anhydrous dichloromethane (0.5 mL). benzofuran-5-ol **2r** (20 mg, 3.0 equiv) was added. The mixture was stirred for 5 minutes, followed by the addition of **1a** (0.05 mmol, 15 mg) and 3,3',5,5'-tetra-*tert*-butyldiphenylquinone (12 mg, 0.6 equiv). Then the tube was sealed with a Thermo Scientific PTFE screw cap equipped with a septum, removed from the glovebox. The reaction mixture was stirred at -20 °C for 72 h. After the reaction was completed as indicated by TLC analysis, the solvent was removed under reduced pressure and the residue was purified by silica gel chromatography using petroleum ether/ethyl acetate 10:1 (v/v) to give the product (S)-**3ar** (yield: 51%; 90% ee) and **4ar** (yield: < 5%).

**HPLC analysis:** Daicel Chiralpak AD-3 column (99:1 hexane: 2-propanol, 1 mL/min, 25 °C, 254 nm); t<sub>R</sub> (minor) = 24.02 min, t<sub>R</sub> (major) = 25.91 min, 90% ee.

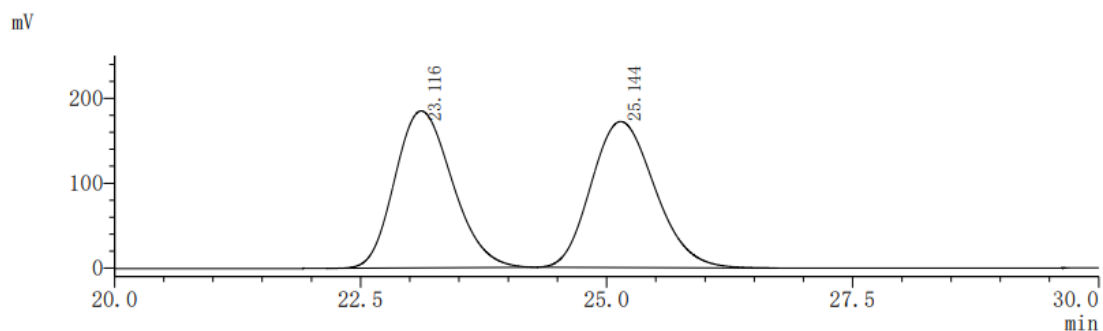

| Peak | PetTime | Type | Width(min) | Area    | Hight  | Area%   |
|------|---------|------|------------|---------|--------|---------|
| 1    | 23.116  | M    | 1.0757     | 7509740 | 184674 | 49.3069 |
| 2    | 25.144  | M    | 1.1867     | 7720854 | 171810 | 50.6931 |

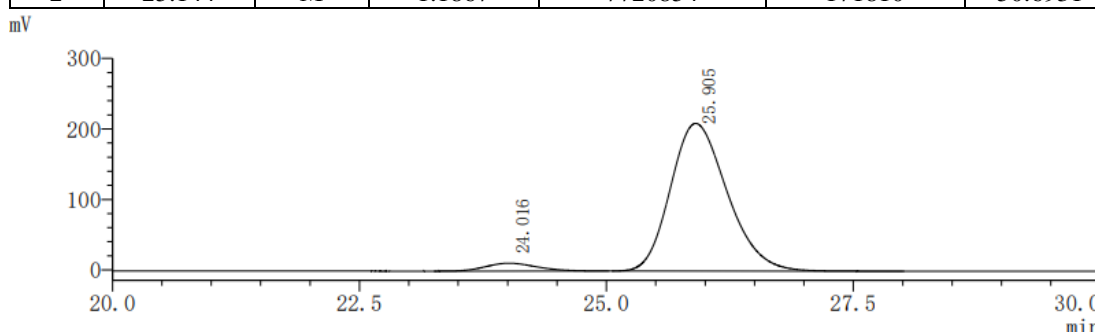

| Peak | PetTime | Type | Width(min) | Area    | Hight  | Area%   |
|------|---------|------|------------|---------|--------|---------|
| 1    | 24.016  | M    | 0.9471     | 405308  | 11229  | 4.6073  |
| 2    | 25.905  | M    | 1.0546     | 8391807 | 209570 | 95.3927 |

#### 4.3.2 General procedure for for NHC-catalyzed kinetic resolution (KR) of *Rac*-3aa with benzofuran-5-ol and characterization data.

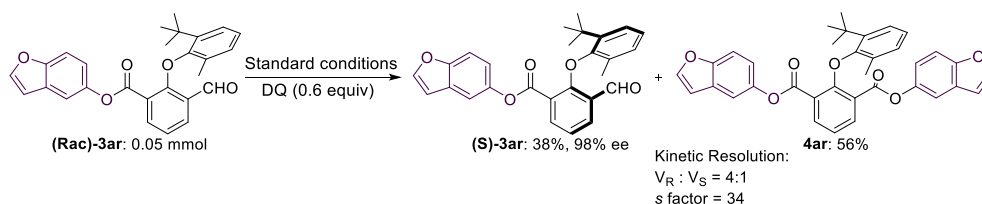

In a nitrogen-filled glovebox, a flame-dried screw-cap reaction tube equipped with a Teflon-coated magnetic stir bar was charged **NHC-1** (15 mol%, 3.1 mg),  $\text{Cs}_2\text{CO}_3$  (25.0 mg, 1.5 equiv), and anhydrous dichloromethane (0.5 mL). benzofuran-5-ol **2r** (20 mg, 3.0 equiv) was added. The mixture was stirred for 5 minutes, followed by the addition of (*Rac*)-**3ar** (0.05 mmol, 21.4 mg) and 3,3',5,5'-tetra-*tert*-butyldiphenylquinone (12 mg, 0.6 equiv). Then the tube was sealed with a Thermo Scientific PTFE screw cap equipped with a septum, removed from the glovebox. The reaction mixture was stirred at -20 °C for 72 h. After the reaction was completed as indicated by TLC analysis, the solvent was removed under reduced pressure and the residue was purified by silica gel chromatography using petroleum ether/ethyl acetate 10:1 (v/v) to give the product (*S*)-**3ar** (yield: 38%; 98% ee) and **4ar** (yield: 56%).

**HPLC analysis:** Daicel Chiralpak AD-3 column (99:1 hexane: 2-propanol, 1 mL/min, 25 °C, 254 nm);  $t_R$  (minor) = 24.65 min,  $t_R$  (major) = 25.76 min, 98% ee.

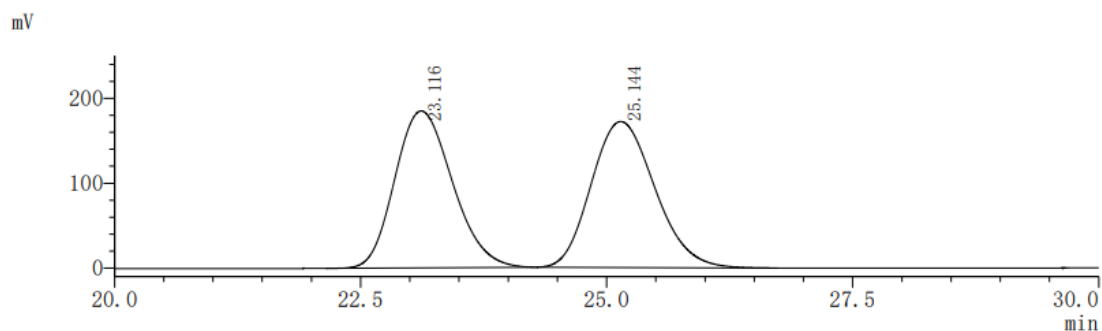

| Peak | PetTime | Type | Width(min) | Area    | Hight  | Area%   |
|------|---------|------|------------|---------|--------|---------|
| 1    | 23.116  | M    | 1.0757     | 7509740 | 184674 | 49.3069 |
| 2    | 25.144  | M    | 1.1867     | 7720854 | 171810 | 50.6931 |

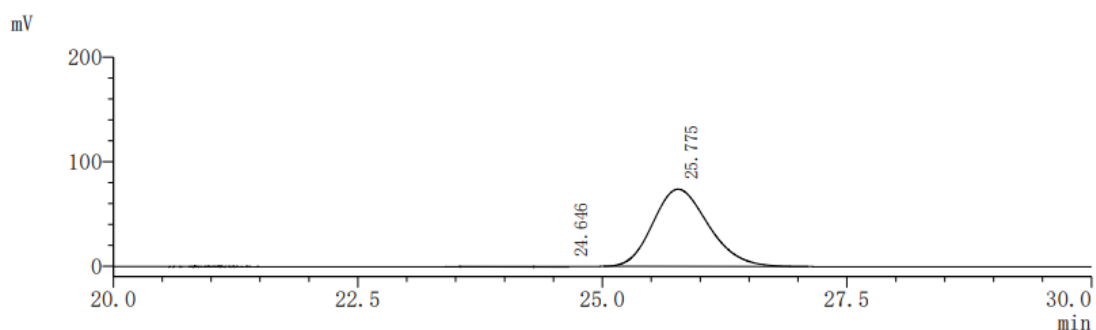

| Peak | PetTime | Type | Width(min) | Area    | Hight | Area%   |
|------|---------|------|------------|---------|-------|---------|
| 1    | 24.646  | M    | 0.9037     | 24137   | 507   | 0.8206  |
| 2    | 25.775  | M    | 1.0405     | 2917449 | 73907 | 99.1794 |

#### Dimethyl 2-(naphthalen-1-yl)isophthalate 4ar

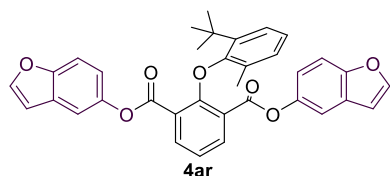

**4ar:** Yellow oil, 15.1 mg, 54%, 72 h; <sup>1</sup>H NMR (500 MHz, Chloroform-*d*) δ 7.97 (d, *J* = 7.7 Hz, 2H), 7.63 (d, *J* = 2.2 Hz, 2H), 7.43 (d, *J* = 8.8 Hz, 2H), 7.28 (t, *J* = 7.7 Hz, 1H), 7.22 (dd, *J* = 6.9, 2.7 Hz, 1H), 7.13 (d, *J* = 2.4 Hz, 2H), 7.09 – 7.03 (m, 2H), 6.83 (dd, *J* = 8.9, 2.4 Hz, 2H), 6.73 (dd, *J* = 2.2, 1.0 Hz, 2H), 2.08 (s, 3H), 1.40 (s, 9H). <sup>13</sup>C NMR (150 MHz, Chloroform-*d*) δ 165.01, 153.70, 153.21, 152.59, 146.25, 146.03, 141.72, 134.60, 130.61, 127.92, 127.44, 126.11, 124.27, 123.29, 121.69, 117.96, 113.68, 111.65, 106.88, 76.82, 35.59, 30.65, 18.18. HRMS (ESI-TOF) (*m/z*): Calcd for C<sub>35</sub>H<sub>28</sub>NaO<sub>7</sub>, ([M + Na]<sup>+</sup>), 583.1727; found 583.1720.

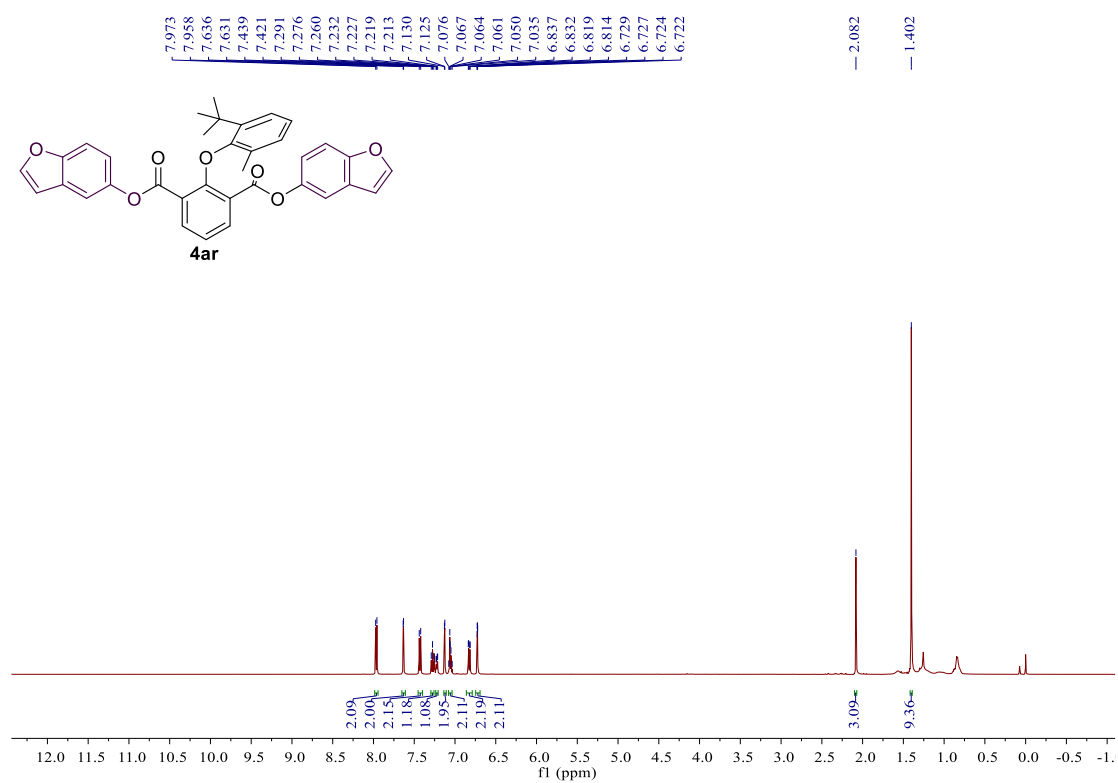

**<sup>1</sup>H NMR (500 MHz, CDCl<sub>3</sub>) spectrum of 4ar**

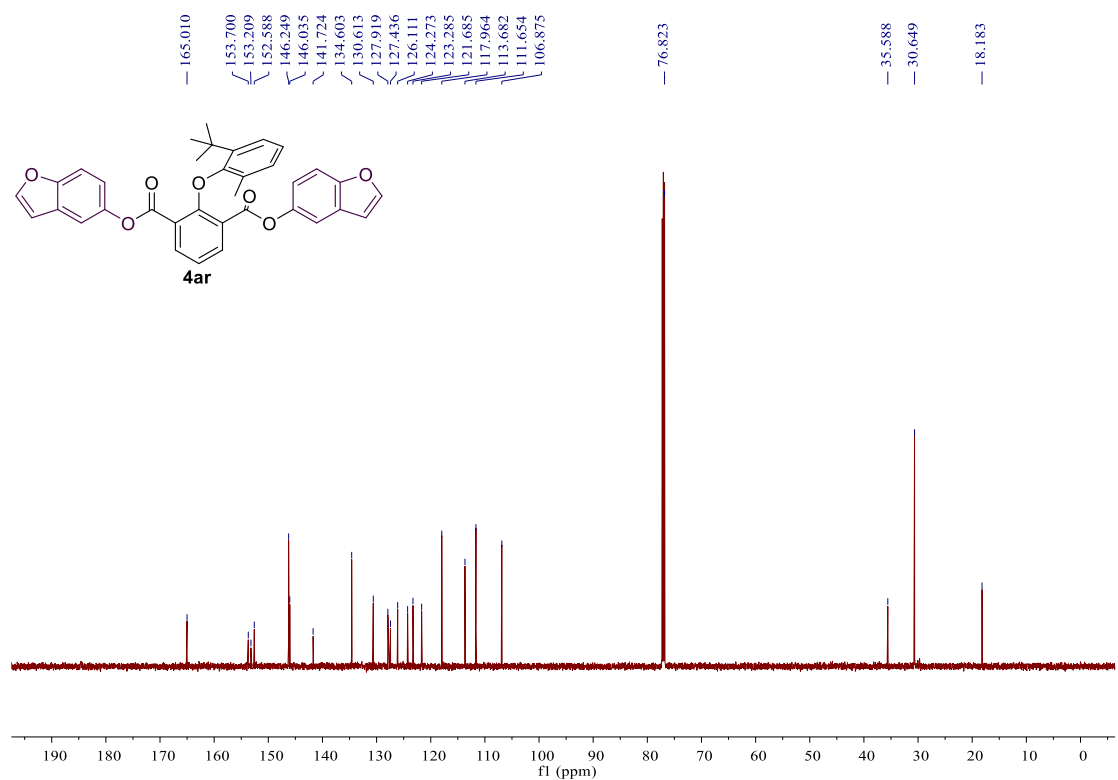

**<sup>13</sup>C NMR (150 MHz, CDCl<sub>3</sub>) spectrum of 4ar.**

#### 4.4 NHC-catalyzed tandem desymmetrization-kinetic resolution<sup>[5,6]</sup>

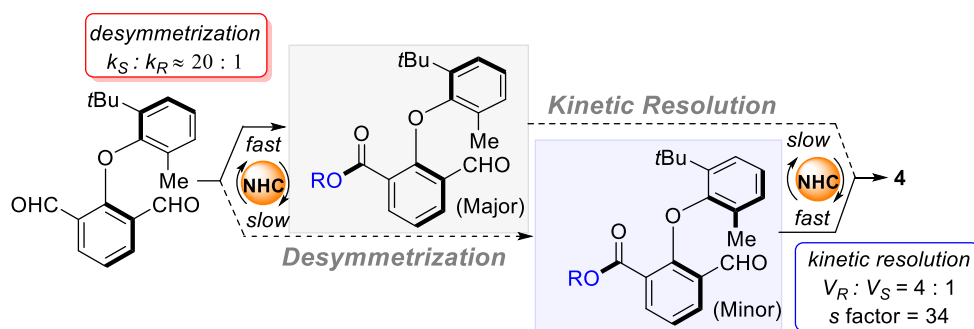

#### 4.5 Determination of Rotational Barrier and half-life for C-O Bond in **3ar**.<sup>[7-9]</sup>

Following the procedure of Curran,<sup>[8]</sup> compound **3ar** was dissolved in 'PrOH to make a 1 mg/mL solution in a sealed tube. The tube was kept in a pre-equilibrated metal bath maintained at 100 °C. At 1 h time intervals, the sealed tube was taken out briefly (1-2 min) from the metal bath and a 20 µL aliquot was taken out via syringe and injected onto the analytical HPLC column to determine the er. This er was plotted against time, and the barrier to rotation was calculated from the plot. In the y-axis of the graph, "m" stands for the % of the minor enantiomer, and "M" denotes the % of the major enantiomer. All the data have been recorded at 373.15 K (100 °C). The rate value can be inserted into **Equation 2** to give  $\Delta G^\ddagger_{373.15\text{ K}}$  and into **Equation 1** to give the half-life to racemisation.

$k_B$  = Boltzmann's constant [ $1.381 \times 10^{-23} \text{ J K}^{-1}$ ],  $T$  = temperature in K,  $h$  = Planck's constant [ $6.626 \times 10^{-34} \text{ J s}$ ],  $R$  = gas constant [ $8.3145 \text{ J mol}^{-1}$ ]. Then the simplified equation for racemization is:

$$\ln [(M + m)/(M - m)] = k_{\text{rac}}t + c = 2k_{\text{rot}}t + c$$

$$k_{\text{rot}} = (\text{slope}/2)$$

$$t_{1/2} = \ln(2)/k_{\text{rot}} \quad \text{Equation 1}$$

The experimental data is shown below:

| Time (h) | % of major enantiomer (M) | % of minor enantiomer (m) | M + m | M - m   | (M + m) / (M - m) | $\ln [(M + m) / (M - m)]$ |
|----------|---------------------------|---------------------------|-------|---------|-------------------|---------------------------|
| 0        | 99.1107                   | 0.8893                    | 100   | 98.2214 | 1.01811           | 0.017948                  |
| 1        | 98.5960                   | 1.4040                    | 100   | 97.1920 | 1.02889           | 0.028481                  |
| 2        | 98.0835                   | 1.9165                    | 100   | 96.1670 | 1.03986           | 0.039086                  |
| 3        | 97.7254                   | 2.2746                    | 100   | 95.4508 | 1.04766           | 0.046559                  |
| 4        | 97.3970                   | 2.6030                    | 100   | 94.7940 | 1.05492           | 0.053465                  |
| 5        | 97.0291                   | 2.9709                    | 100   | 94.0582 | 1.06317           | 0.061255                  |
| 6        | 96.3823                   | 3.6177                    | 100   | 92.7646 | 1.07800           | 0.075108                  |
| 7        | 95.9050                   | 4.0950                    | 100   | 91.8100 | 1.08921           | 0.085453                  |
| 8        | 95.4780                   | 4.5220                    | 100   | 90.9560 | 1.09943           | 0.094792                  |
| 9        | 95.0433                   | 4.9567                    | 100   | 90.0866 | 1.11043           | 0.104747                  |
| 10       | 94.7862                   | 5.2138                    | 100   | 89.5724 | 1.11642           | 0.110127                  |
| 11       | 94.3094                   | 5.6906                    | 100   | 88.6188 | 1.12843           | 0.120827                  |
| 12       | 93.7768                   | 6.2232                    | 100   | 87.5536 | 1.14216           | 0.132921                  |
| 13       | 93.3062                   | 6.6938                    | 100   | 86.6124 | 1.15457           | 0.143728                  |
| 14       | 92.8331                   | 7.1669                    | 100   | 85.6662 | 1.16732           | 0.154711                  |
| 15       | 92.4885                   | 7.5115                    | 100   | 84.9770 | 1.17679           | 0.162790                  |

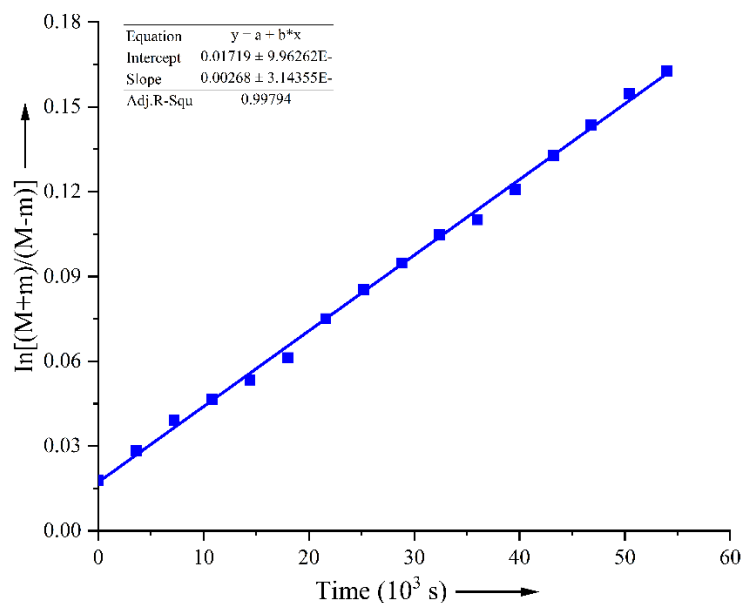

Figure 1. Plot for the Determination of Rotational Barrier and Half-Life for C-O Bond in **3ar**.

So, from plot,  $k_{\text{rot}} = [(0.00268 \times 10^{-3})/2] = 1.34 \times 10^{-6} \text{ s}^{-1}$

$$k_{\text{rot}}^{\ddagger} = [(k_{\text{rot}} \times h)/k_B T] = 0.172 \times 10^{-18}$$

$$\Delta G_{\text{rot}}^{\ddagger} = -RT \ln k_{\text{rot}}^{\ddagger} \quad \text{Equation 2}$$

$$= 134.046 \text{ kJ/mol} = 32.0 \text{ kcal/mol}$$

$$t_{1/2} = \ln(2)/k_{\text{rot}} = 143.69 \text{ h}$$

#### HPLC data for the Analysis of C-O Bond Rotational Barrier:

**HPLC analysis:** Daicel Chiralpak AD-3 column (99:1 hexane: 2-propanol, 1 mL/min, 25 °C, 254 nm)

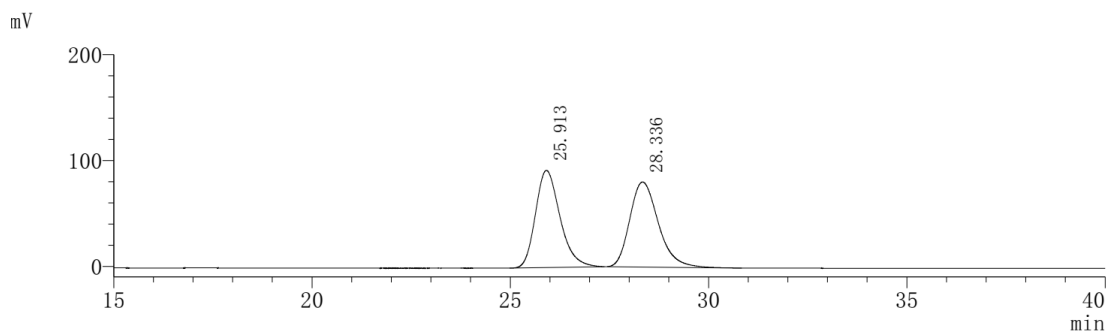

| Peak | PetTime | Type | Width(min) | Area    | Hight | Area%   |
|------|---------|------|------------|---------|-------|---------|
| 1    | 25.913  | M    | 1.1182     | 3948832 | 91791 | 49.5170 |
| 2    | 28.336  | M    | 1.2899     | 4025867 | 80285 | 50.4830 |

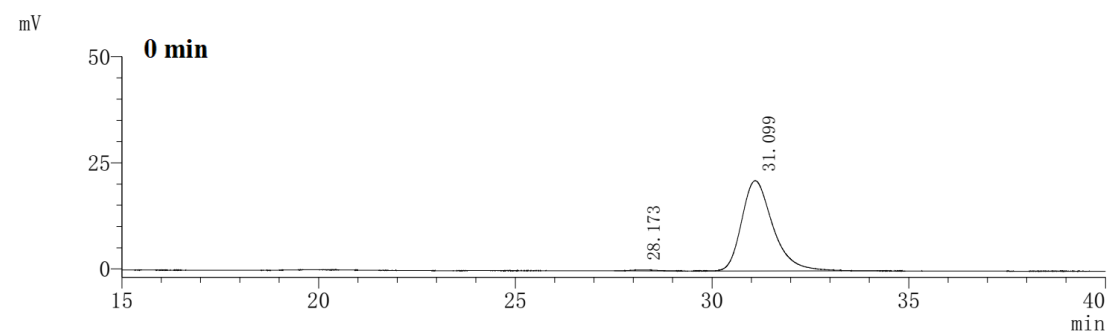

| Peak | PetTime | Type | Width(min) | Area    | Hight | Area%   |
|------|---------|------|------------|---------|-------|---------|
| 1    | 28.173  | M    | 0.8605     | 10564   | 234   | 0.8893  |
| 2    | 31.099  | M    | 1.3960     | 1177271 | 21254 | 99.1107 |

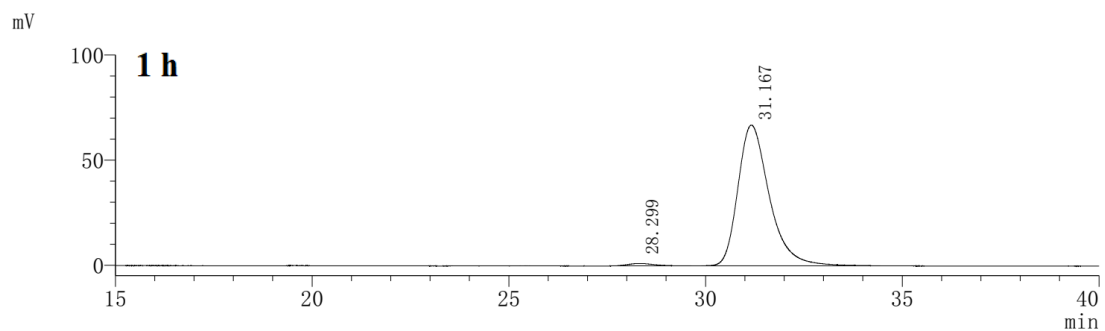

| Peak | PetTime | Type | Width(min) | Area    | Hight | Area%   |
|------|---------|------|------------|---------|-------|---------|
| 1    | 28.299  | M    | 1.1567     | 52879   | 1144  | 1.4040  |
| 2    | 31.167  | M    | 1.4099     | 3713538 | 66967 | 98.5960 |

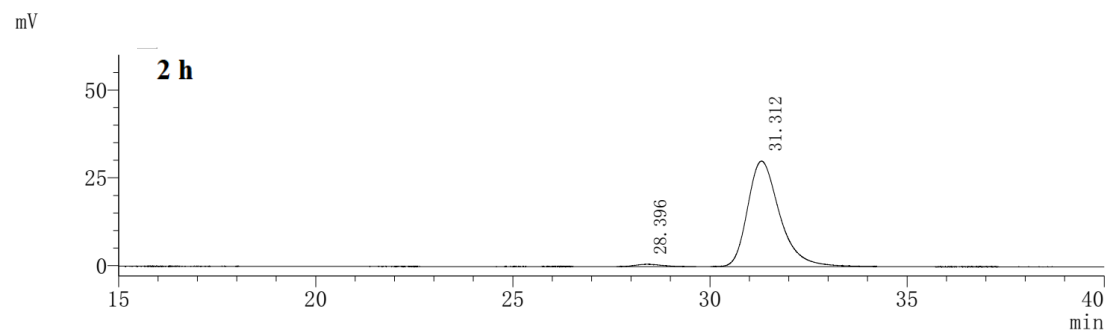

| Peak | PetTime | Type | Width(min) | Area    | Hight | Area%   |
|------|---------|------|------------|---------|-------|---------|
| 1    | 28.396  | M    | 1.1185     | 33219   | 682   | 1.9165  |
| 2    | 31.312  | M    | 1.4452     | 1700076 | 30071 | 98.0835 |

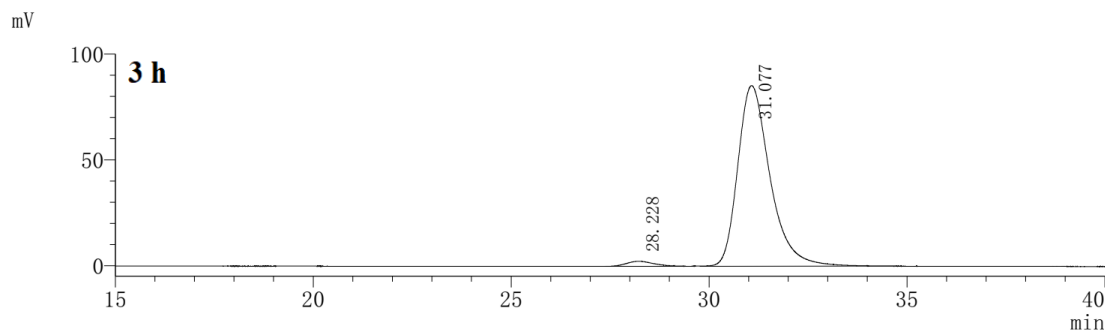

| Peak | PetTime | Type | Width(min) | Area    | Hight | Area%   |
|------|---------|------|------------|---------|-------|---------|
| 1    | 28.228  | M    | 1.2275     | 112495  | 2350  | 2.2746  |
| 2    | 31.077  | M    | 1.4368     | 4833281 | 85346 | 97.7254 |

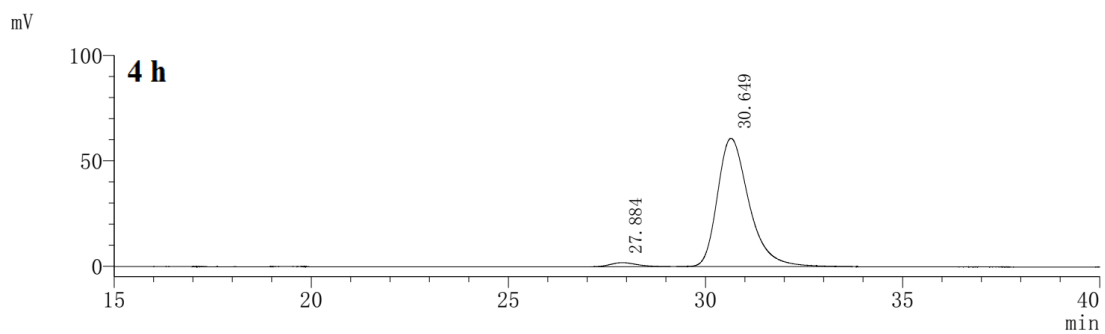

| Peak | PetTime | Type | Width(min) | Area    | Hight | Area%   |
|------|---------|------|------------|---------|-------|---------|
| 1    | 27.884  | M    | 1.2039     | 90692   | 1933  | 2.6030  |
| 2    | 30.649  | M    | 1.4191     | 3393365 | 60880 | 97.3970 |

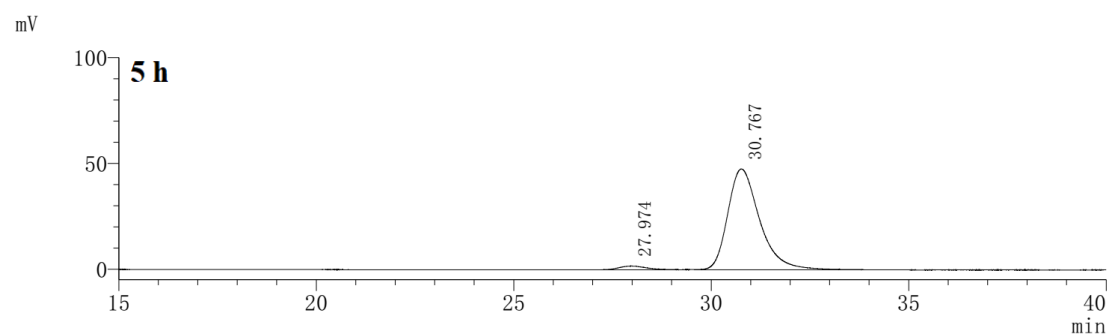

| Peak | PetTime | Type | Width(min) | Area    | Hight | Area%   |
|------|---------|------|------------|---------|-------|---------|
| 1    | 27.974  | M    | 1.2947     | 81719   | 1733  | 2.9709  |
| 2    | 30.767  | M    | 1.4305     | 2668939 | 47601 | 97.0291 |

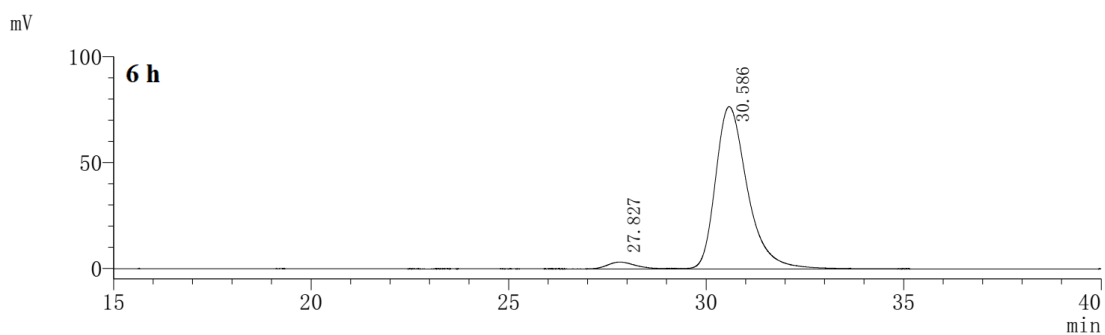

| Peak | PetTime | Type | Width(min) | Area    | Hight | Area%   |
|------|---------|------|------------|---------|-------|---------|
| 1    | 27.827  | M    | 1.2548     | 161650  | 3233  | 3.6177  |
| 2    | 30.586  | M    | 1.4141     | 4306640 | 76614 | 96.3823 |

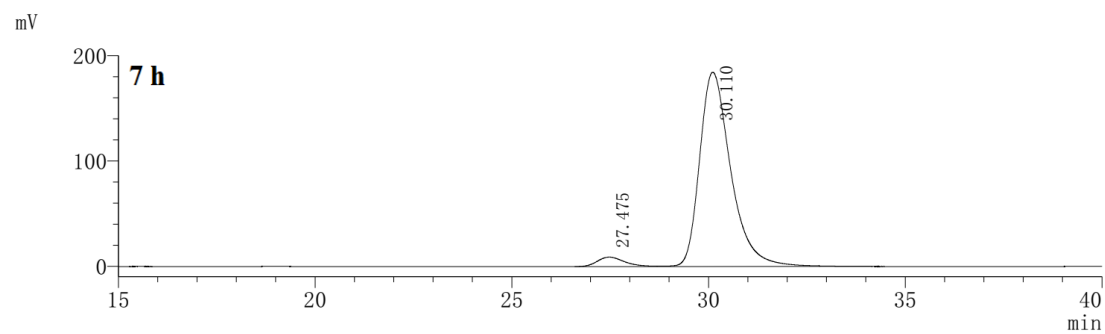

| Peak | PetTime | Type | Width(min) | Area   | Hight | Area%  |
|------|---------|------|------------|--------|-------|--------|
| 1    | 27.475  | M    | 1.2216     | 434195 | 9002  | 4.0950 |

|   |        |   |        |          |        |         |
|---|--------|---|--------|----------|--------|---------|
| 2 | 30.110 | M | 1.3948 | 10168957 | 184560 | 95.9050 |
|---|--------|---|--------|----------|--------|---------|

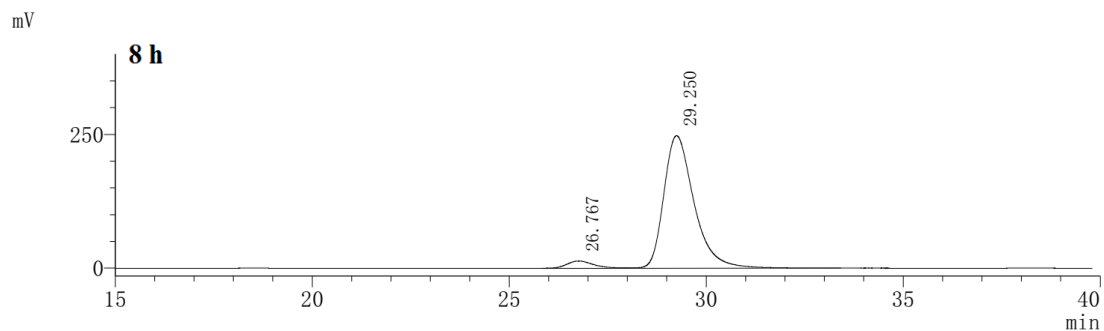

| Peak | PetTime | Type | Width(min) | Area     | Hight  | Area%   |
|------|---------|------|------------|----------|--------|---------|
| 1    | 26.767  | M    | 1.1946     | 626510   | 13420  | 4.5220  |
| 2    | 29.250  | M    | 1.3565     | 13228249 | 247808 | 95.4780 |

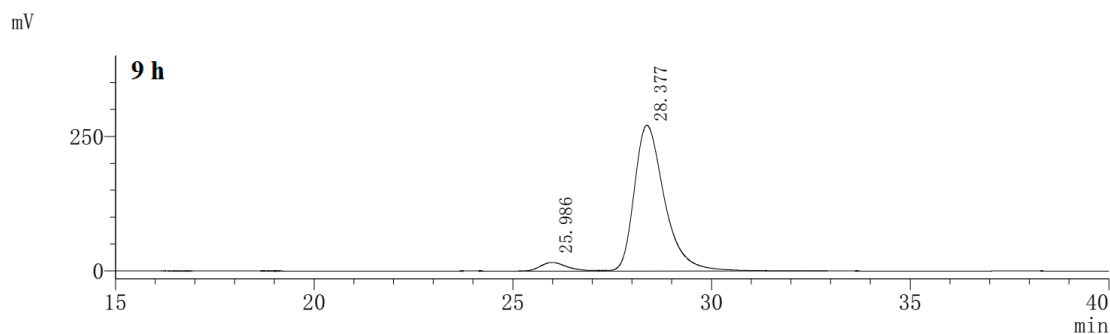

| Peak | PetTime | Type | Width(min) | Area     | Hight  | Area%   |
|------|---------|------|------------|----------|--------|---------|
| 1    | 25.986  | M    | 1.1897     | 746370   | 15925  | 4.9567  |
| 2    | 28.377  | M    | 1.3376     | 14311456 | 270674 | 95.0433 |

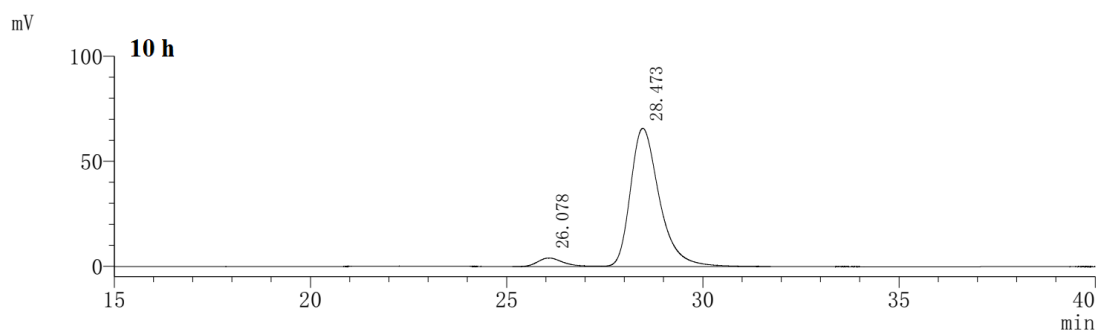

| Peak | PetTime | Type | Width(min) | Area    | Hight | Area%   |
|------|---------|------|------------|---------|-------|---------|
| 1    | 26.078  | M    | 1.1403     | 185885  | 4079  | 5.2138  |
| 2    | 28.473  | M    | 1.3059     | 3379354 | 65868 | 94.7862 |

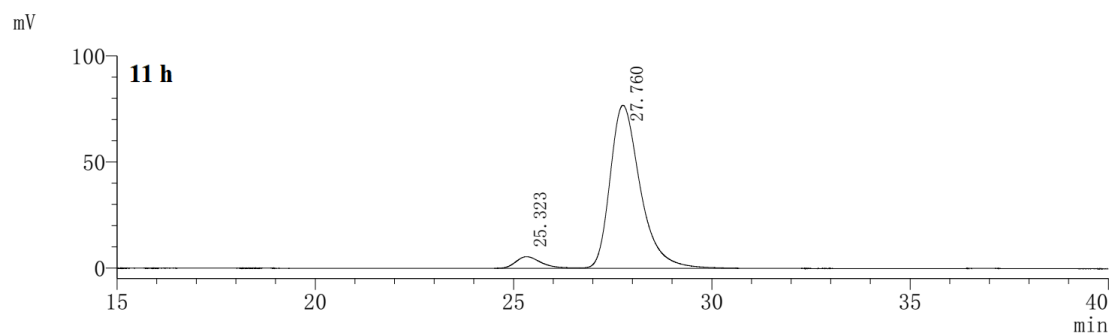

| Peak | PetTime | Type | Width(min) | Area    | Hight | Area%   |
|------|---------|------|------------|---------|-------|---------|
| 1    | 25.323  | M    | 1.1467     | 245553  | 5493  | 5.6906  |
| 2    | 27.760  | M    | 1.3348     | 4069485 | 76883 | 94.3094 |

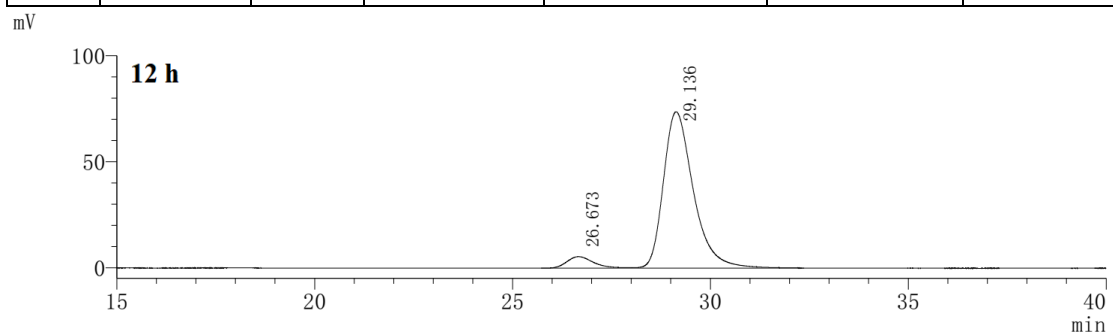

| Peak | PetTime | Type | Width(min) | Area    | Hight | Area%   |
|------|---------|------|------------|---------|-------|---------|
| 1    | 26.673  | M    | 1.1795     | 257341  | 5442  | 6.2232  |
| 2    | 29.136  | M    | 1.3355     | 3877829 | 73730 | 93.7768 |

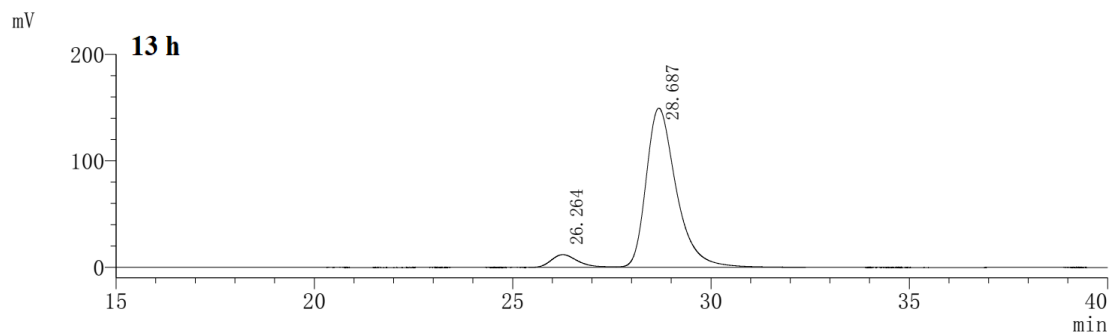

| Peak | PetTime | Type | Width(min) | Area    | Hight  | Area%   |
|------|---------|------|------------|---------|--------|---------|
| 1    | 26.264  | M    | 1.1858     | 566306  | 12031  | 6.6938  |
| 2    | 28.687  | M    | 1.3396     | 7893791 | 149630 | 93.3062 |

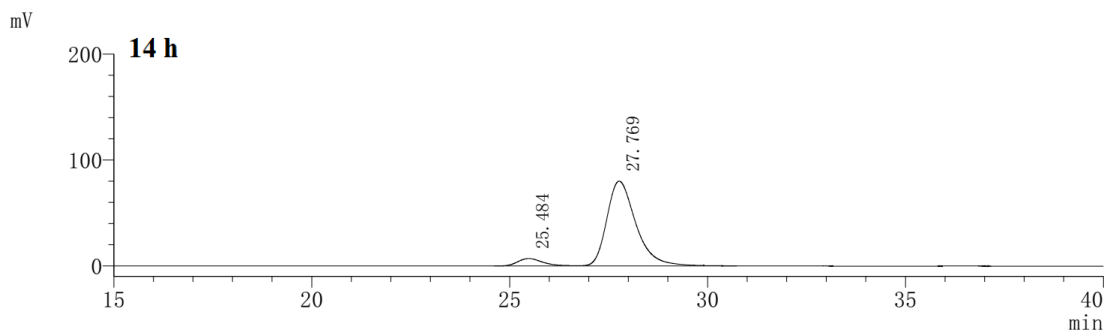

| Peak | PetTime | Type | Width(min) | Area    | Hight | Area%   |
|------|---------|------|------------|---------|-------|---------|
| 1    | 25.484  | M    | 1.1269     | 316137  | 7060  | 7.1669  |
| 2    | 27.769  | M    | 1.2987     | 4094922 | 80188 | 92.8331 |

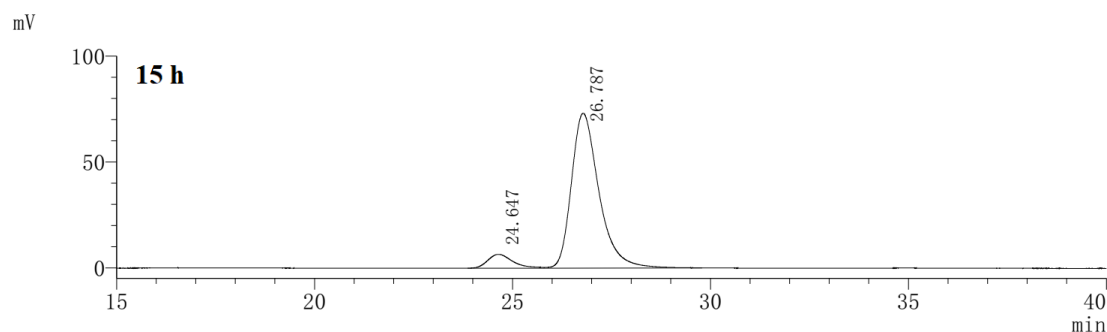

| Peak | PetTime | Type | Width(min) | Area    | Hight | Area%   |
|------|---------|------|------------|---------|-------|---------|
| 1    | 24.647  | M    | 1.0946     | 287083  | 6550  | 7.5115  |
| 2    | 26.787  | M    | 1.2238     | 3534819 | 73139 | 92.4885 |

## V. Determining the Absolute Configuration of **3aa**<sup>[1]</sup>

The absolute stereochemistry of chiral esterification product **3aa** was determined by the HPLC compared with the known compounds (see below).

The known compound (R)- (2-(2-(tert-butyl)-6-methylphenoxy)-3-(((3,5-dimethoxyphenyl)amino)methyl)phenyl)methanol (**R-6**) HPLC as follow in Zeng and Zhong's work<sup>[1]</sup> : HPLC (DAICEL Chiralpak AD, isohexane/isopropanol = 90/10, flow 1.0 mL/min, detection at 254 nm) retention time = 21.7 min (major) and 36.0 min (minor), and our experimental results show that Chiral compound **6** converted from chiral esterification product **3aa** is opposite to Zeng and Zhong's work. As follow: HPLC (DAICEL Chiralpak AD-3, isohexane/ isopropanol = 90/10, flow 1.0 mL/min, detection at 254 nm) retention time = 27.4 min (minor) and 44.2 min (major).

Conclusion: The results above showed that the absolute configuration of **6** we synthesized is opposite to Zeng and Zhong's work. So the absolute configuration of **3aa** is determined to be **S** type.

Synthesis method from compound **3aa** to **6**

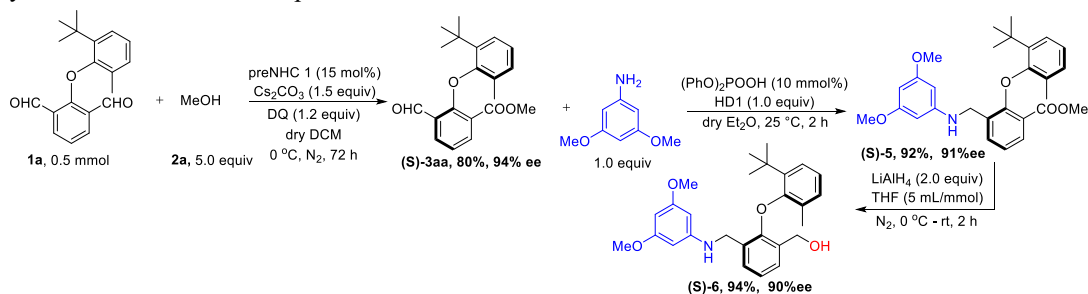

A 25 mL vial containing a magnetic stir bar, was added (**S**)-**3aa** (150.0 mg, 0.46 mmol, 1.0 equiv), diphenyl phosphate (11.5 mg, 0.046 mmol, 0.1 equiv), Diethyl 1,4-dihydro-2,6-dimethyl-3,5-pyridinedicarboxylate (HD1) (117.0 mg, 0.046 mmol, 1.0 equiv), 3,5-dimethoxyaniline (70.0 mg, 0.46 mmol, 1.0 equiv) and 30 ml dry Et<sub>2</sub>O. After stirring at the 25 °C for 2 h, the reaction mixture concentrated in vacuo to give a residue, which was purified by flash chromatography to afford the products (**S**)-**5** as Black green oil. yield: 193.9 mg (91%). *R*<sub>f</sub>=0.40 (hexanes/EtOAc = 5:1). <sup>1</sup>H NMR (500 MHz, Chloroform-*d*) δ 7.52 (dd, *J* = 7.6, 1.8 Hz, 1H), 7.34 (dd, *J* = 7.7, 1.8 Hz, 1H), 7.25 (d, *J* = 2.1 Hz, 1H), 7.02 (t, *J* = 7.6 Hz, 1H), 7.00 – 6.94 (m, 2H), 5.88 (t, *J* = 2.1 Hz, 1H), 5.76 (d, *J* = 2.1 Hz, 2H), 4.40 (d,

$J = 16.2$  Hz, 1H), 4.29 (d,  $J = 16.2$  Hz, 1H), 3.71 (s, 6H), 3.33 (s, 3H), 1.86 (s, 3H), 1.45 (s, 9H).  **$^{13}\text{C}$  NMR (150 MHz, Chloroform- $d$ )**  $\delta$  167.73, 161.73, 153.09, 151.88, 149.76, 140.95, 131.27, 130.19, 129.44, 129.25, 127.94, 125.33, 123.97, 122.06, 121.86, 91.68, 90.12, 55.13, 51.92, 43.84, 35.43, 30.66, 17.83. **HRMS (ESI-TOF)** ( $m/z$ ): Calcd for  $\text{C}_{28}\text{H}_{33}\text{NNaO}_5$ , ( $[\text{M} + \text{Na}]^+$ ), 486.2251; found 486.2266.

**HPLC analysis:** Daicel Chiralpak AD-3 column (95:5 hexane: 2-propanol, 1 mL/min, 25 °C, 254 nm);  $t_R$  (major) = 15.00 min,  $t_R$  (minor) = 16.59 min, 91% ee.

mV

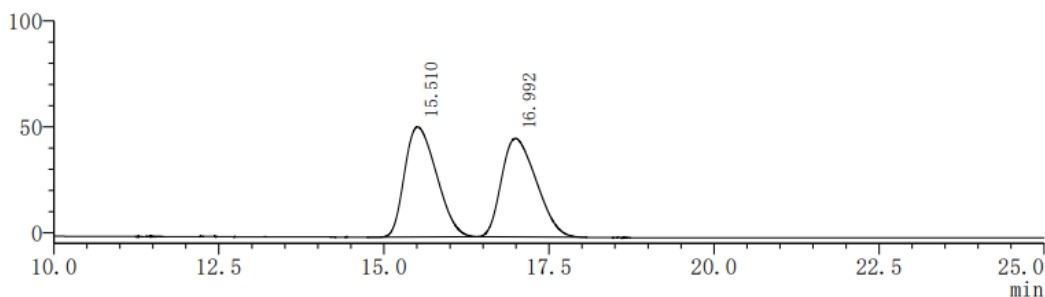

| Peak | PetTime | Type | Width(min) | Area    | Hight | Area%   |
|------|---------|------|------------|---------|-------|---------|
| 1    | 15.510  | M    | 0.9093     | 1744625 | 51934 | 50.5063 |
| 2    | 16.992  | M    | 1.0058     | 1709649 | 46475 | 49.4937 |

mV

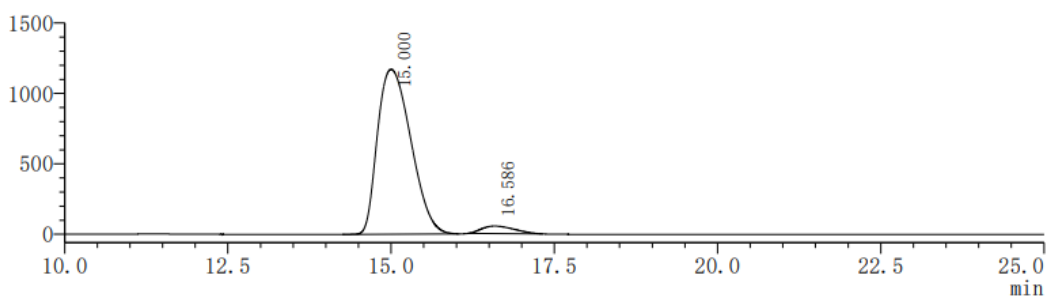

| Peak | PetTime | Type | Width(min) | Area     | Hight   | Area%   |
|------|---------|------|------------|----------|---------|---------|
| 1    | 15.000  | M    | 0.9380     | 41640097 | 1170374 | 95.7233 |
| 2    | 16.586  | M    | 0.9589     | 1860366  | 53436   | 4.2767  |

1.5 equivalents of  $\text{LiAlH}_4$  were added to a solution of **5** (193.0 mg, 0.41 mmol, 1.0 equiv) in THF (5 mL/mmol **5**). After 2 h of stirring at room temperature, the reaction mixture was quenched carefully with water (5 mL/mmol **5**), slightly acidified with 2N HCl, extracted with diethyl ether (3 x 5 mL/mmol **5**), and dried over  $\text{MgSO}_4$ . The solvent was removed in vacuo and the residue was chromatographed on silica gel (PE/EtOAc = 2:1) to give the alcohol **6** in 93% yield.  **$^1\text{H}$  NMR (500 MHz, Chloroform- $d$ )**  $\delta$  7.36 (d,  $J = 7.6$  Hz, 1H), 7.33 (dd,  $J = 7.7$ , 1.8 Hz, 1H), 7.25 (d,  $J = 7.8$  Hz, 1H), 7.04 (t,  $J = 7.6$  Hz, 1H), 6.99 (t,  $J = 7.6$  Hz, 1H), 6.96 – 6.92 (m, 1H), 5.89 – 5.82 (m, 1H), 5.74 – 5.66 (m, 2H), 4.46 (d,  $J = 13.6$  Hz, 1H), 4.37 (d,  $J = 13.6$  Hz, 1H), 4.20 (d,  $J = 15.8$  Hz, 1H), 4.03 (d,  $J = 15.8$  Hz, 1H), 3.68 (s, 6H), 1.81 (s, 3H), 1.45 (s, 9H).  **$^{13}\text{C}$  NMR (150 MHz, Chloroform- $d$ )**  $\delta$  161.70, 154.67, 151.70, 149.98, 140.03, 130.27, 128.42, 128.40, 128.38, 128.35, 127.80, 125.69, 123.85, 123.01, 91.64, 90.02, 60.77, 55.13, 43.68, 35.45, 30.60, 17.92.

**HRMS (ESI-TOF)** ( $m/z$ ): Calcd for  $\text{C}_{27}\text{H}_{33}\text{NNaO}_4$ , ( $[\text{M} + \text{Na}]^+$ ), 458.2302; found 458.2302.

$[\alpha]_D^{19} = +26.7$  ( $c = 0.75$ ,  $\text{CH}_2\text{Cl}_2$ ).

**HPLC analysis:** Daicel Chiralpak AD-3 column (90:10 hexane: 2-propanol, 1 mL/min, 25 °C, 254 nm);  $t_R$  (minor) = 27.38 min,  $t_R$  (major) = 44.19 min, 90% ee.

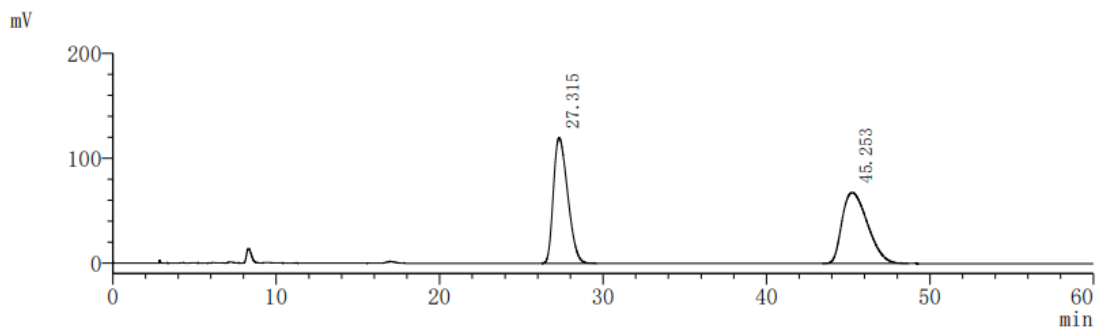

| Peak | PetTime | Type | Width(min) | Area    | Hight  | Area%   |
|------|---------|------|------------|---------|--------|---------|
| 1    | 27.315  | M    | 1.6247     | 7264173 | 119686 | 49.7964 |
| 2    | 45.253  | M    | 2.8484     | 7323576 | 67671  | 50.2036 |

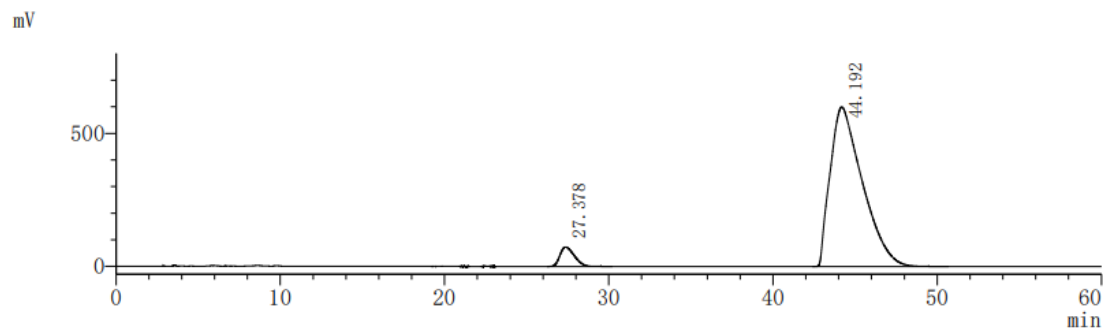

| Peak | PetTime | Type | Width(min) | Area     | Hight  | Area%   |
|------|---------|------|------------|----------|--------|---------|
| 1    | 27.378  | M    | 1.6367     | 4409646  | 72750  | 5.1149  |
| 2    | 44.192  | M    | 3.9764     | 81801622 | 599504 | 94.8851 |

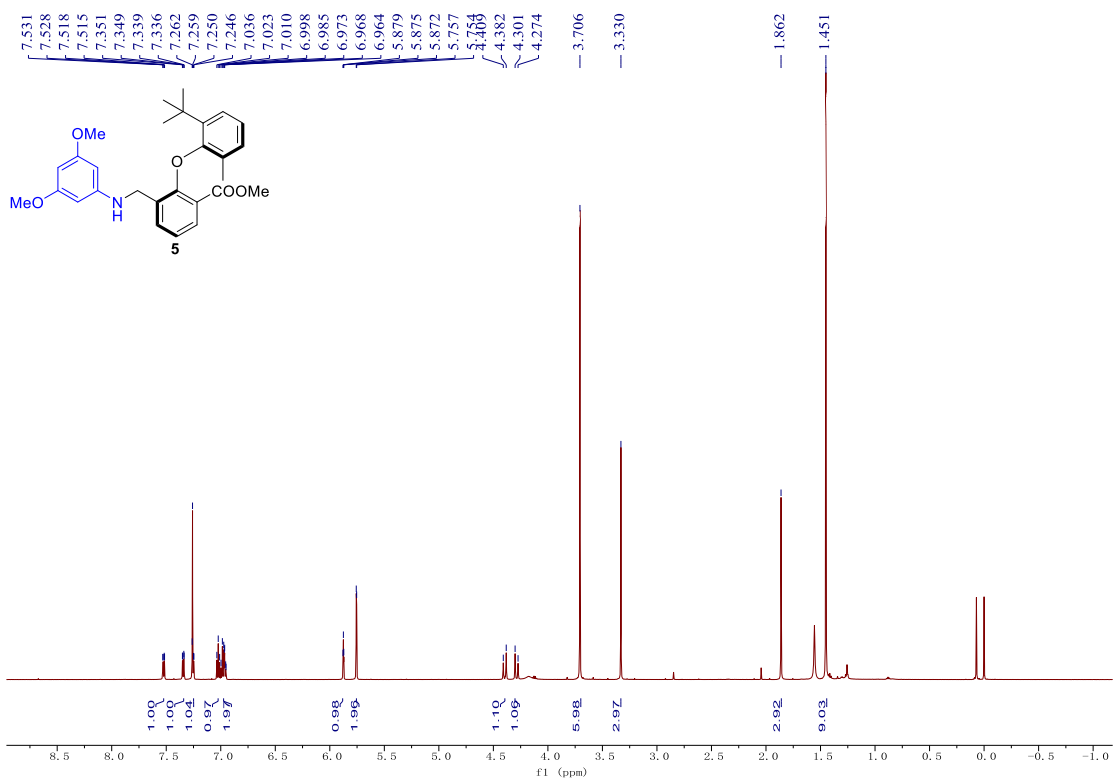

**<sup>1</sup>H NMR (500 MHz, CDCl<sub>3</sub>) spectrum of 5.**

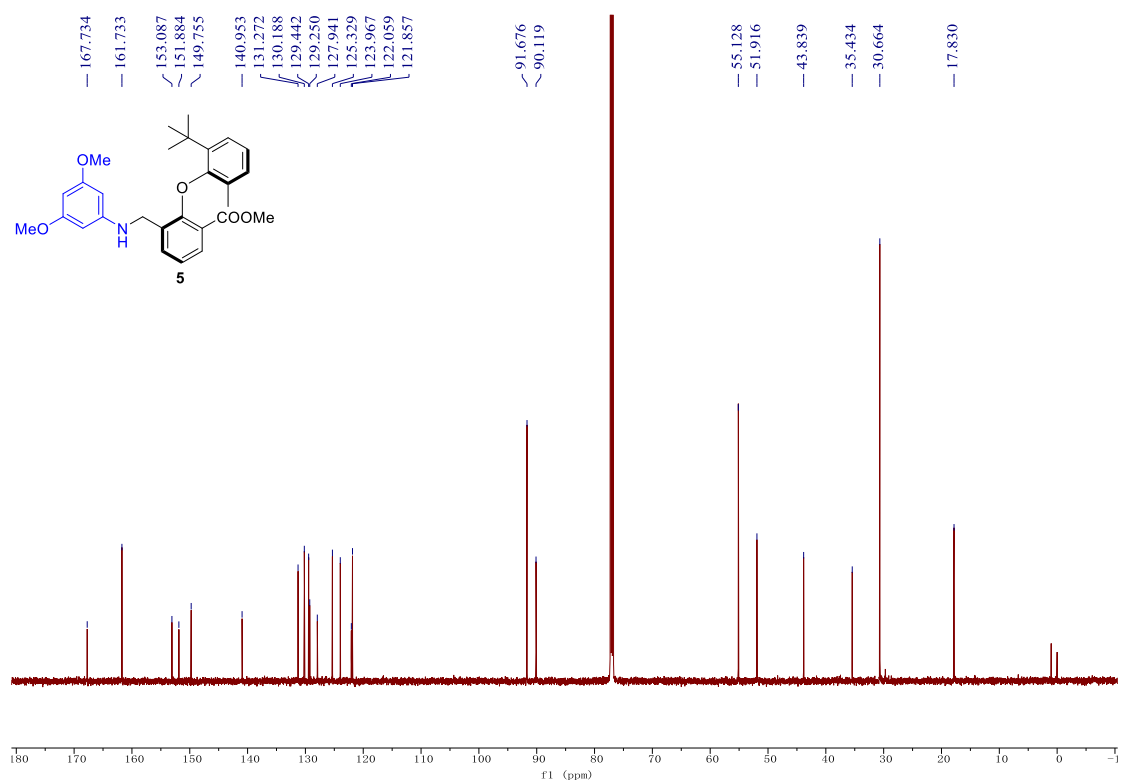

**<sup>13</sup>C NMR (150 MHz, CDCl<sub>3</sub>) spectrum of 5.**

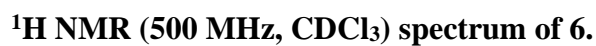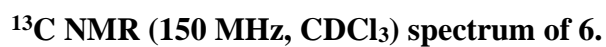

## VI. References

- [1] Dai, L.; Liu, Y.; Xu, Q.; Wang, M.; Zhu, Q.; Yu, P.; Zhong, G.; Zeng, X. A Dynamic Kinetic Resolution Approach to Axially Chiral Diaryl Ethers by Catalytic Atroposelective Transfer Hydrogenation. *Angew. Chem. Int. Ed.* **2022**, DOI: 10.1002/anie.202216534.
- [2] Bao, H.; Chen, Y.; Yang, X. Catalytic Asymmetric Synthesis of Axially Chiral Diaryl Ethers through Enantioselective Desymmetrization. *Angew. Chem. Int. Ed.* **2023**, DOI: 10.1002/anie.202300481.
- [3] C. Zhu, H. Zeng, C. Liu, Y. Cai, X. Fang, H. Jiang, *Org. Lett.* **2020**, *22*, 809–813.
- [4] Sawama, Y.; Miki, Y.; Sajiki, H. N-Heterocyclic Carbene Catalyzed Deuteration of Aldehydes in D<sub>2</sub>O. *Synlett* **2020**, *31*, 699-702.
- [5] Yang, G.; Guo, D.; Meng, D.; Wang, J. NHC-catalyzed atropenantioselective synthesis of axially chiral biaryl amino alcohols via a cooperative strategy. *Nat. Commun.* **2019**, *10*, 3062.
- [6] Fang, S. Tan, J.; Pan, J.; Zhang, H.; Chen, Y.; Ren, X.; Wang, T. Enantiodivergent Kinetic Resolution of 1,1'-Biaryl-2,2'-Diols and Amino Alcohols by Dipeptide-Phosphonium Salt Catalysis Inspired by the Atherton–Todd Reaction. *Angew. Chem. Int. Ed.* **2021**, *60*, 14921-14930.
- [7] Staniland, S.; Adams, R. W.; McDouall, J. J. W.; Maffucci, I.; Contini, A.; Grainger, D. M.; Turner, N. J.; Clayden, J. Biocatalytic Dynamic Kinetic Resolution for the Synthesis of Atropisomeric Biaryl N-Oxide Lewis Base Catalysts. *Angew. Chem. Int. Ed.* **2016**, *55*, 10755-10759.
- [8] Barik, S.; Shee, S.; Das, S.; Gonnade, R. G.; Jindal, G.; Mukherjee, S.; Biju, A. T. NHC-Catalyzed Desymmetrization of N-Aryl Maleimides Leading to the Atroposelective Synthesis of N-Aryl Succinimides. *Angew. Chem. Int. Ed.* **2021**, *60*, 12264-12268.
- [9] Guthrie, D. B.; Curran, D. P. Asymmetric Radical and Anionic Cyclizations of Axially Chiral Carbamates. *Org. Lett.* **2009**, *11*, 249–251.

## VII. $^1\text{H}$ , $^{13}\text{C}$ , $^{19}\text{F}$ NMR Spectra of New Compounds.

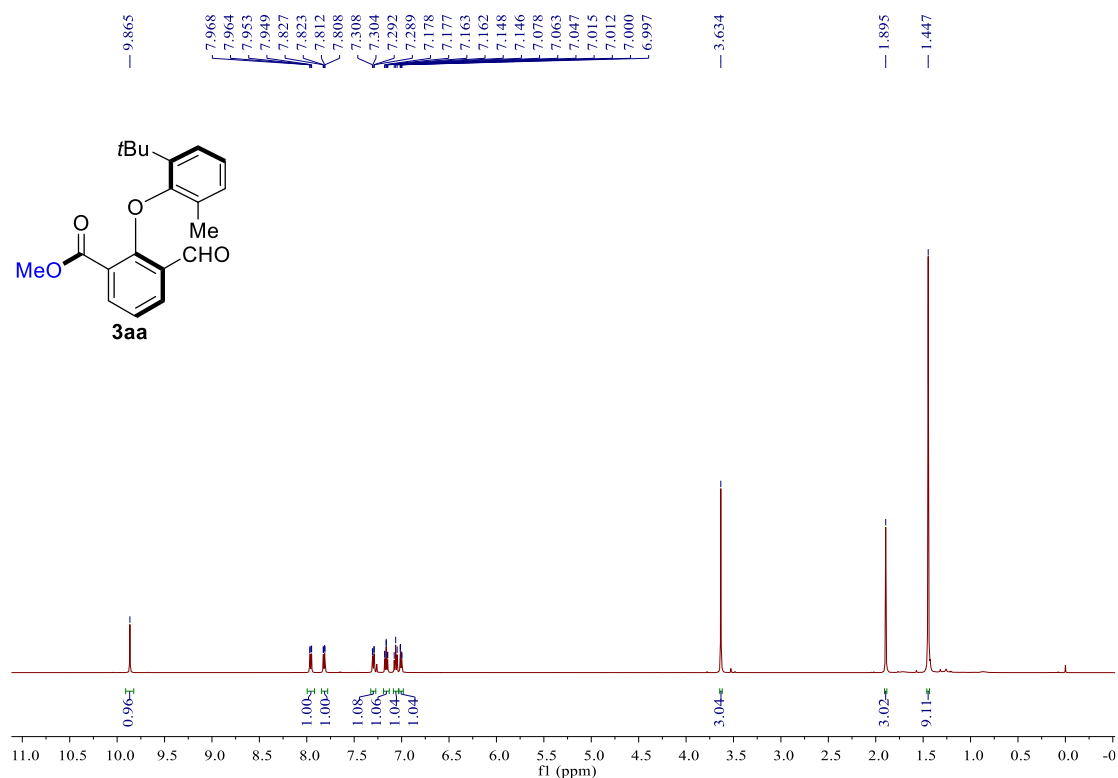

### $^1\text{H}$ NMR (500 MHz, $\text{CDCl}_3$ ) spectrum of **3aa**.

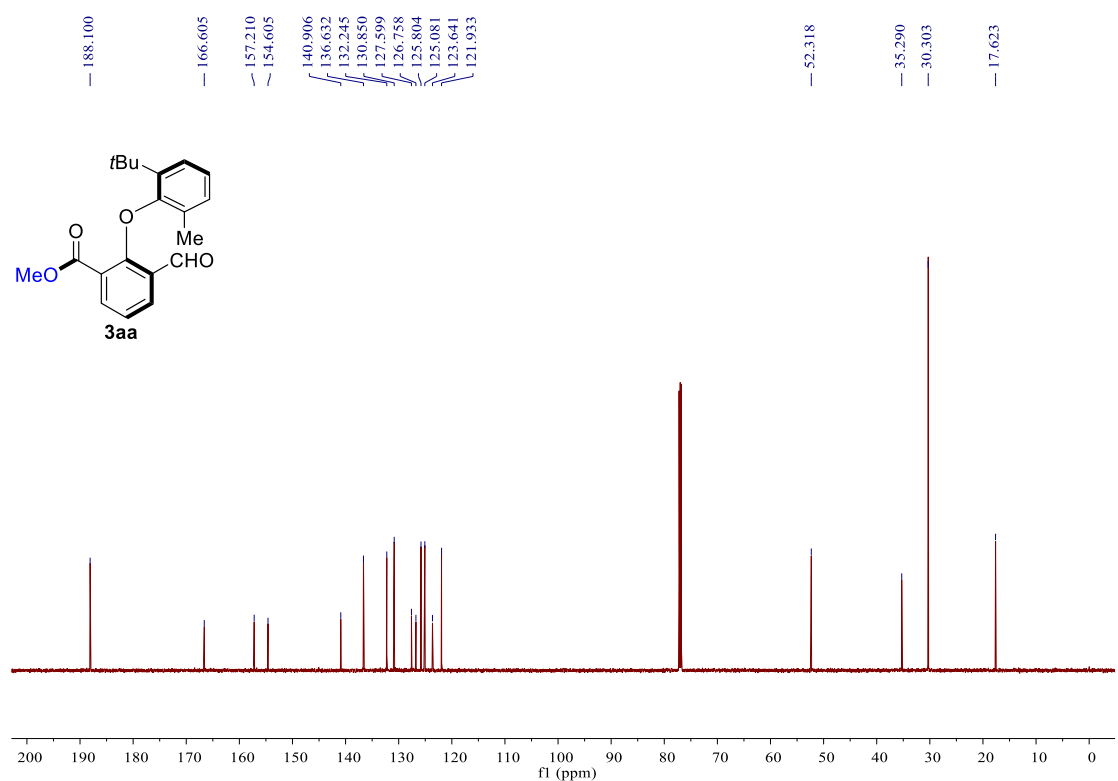

### $^{13}\text{C}$ NMR (150 MHz, $\text{CDCl}_3$ ) spectrum of **3aa**.

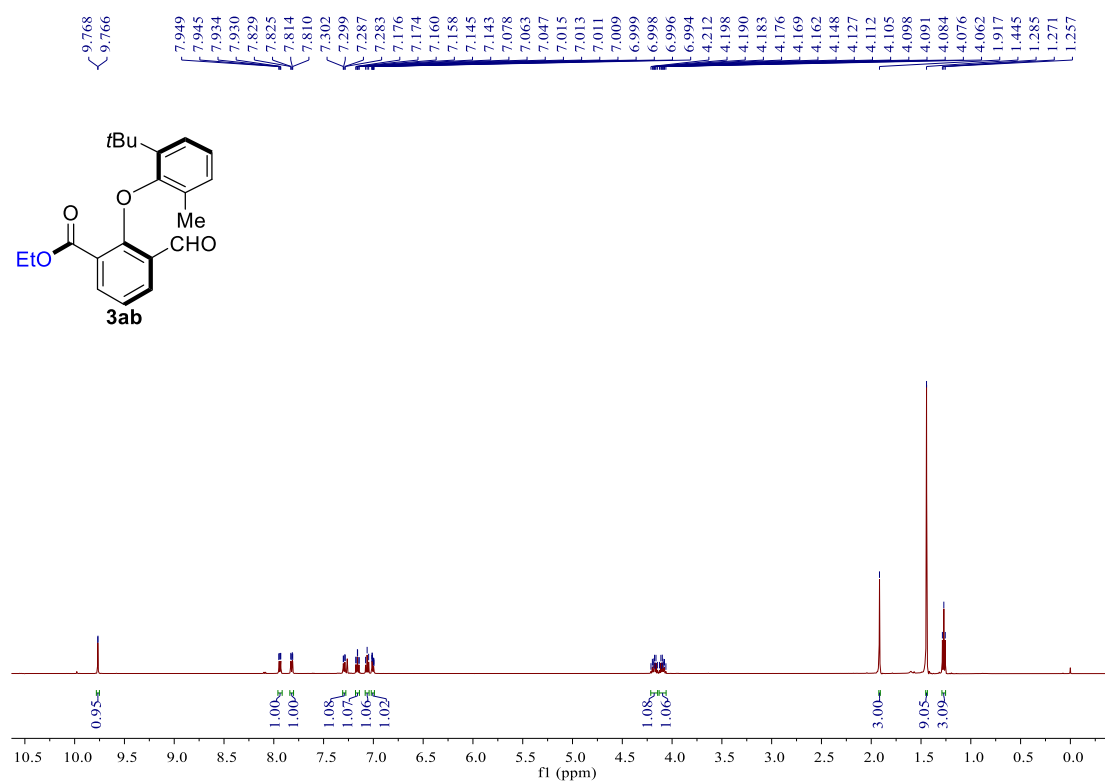

**<sup>1</sup>H NMR (500 MHz, CDCl<sub>3</sub>) spectrum of 3ab.**

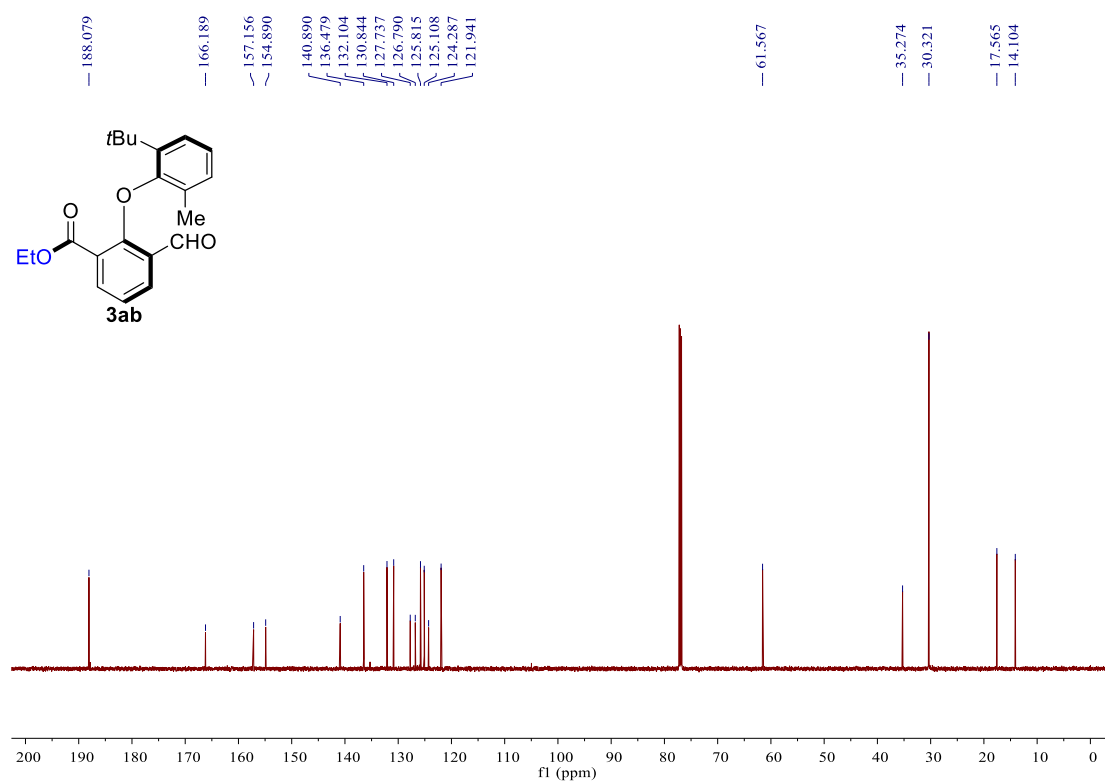

**<sup>13</sup>C NMR (150 MHz, CDCl<sub>3</sub>) spectrum of 3ab.**

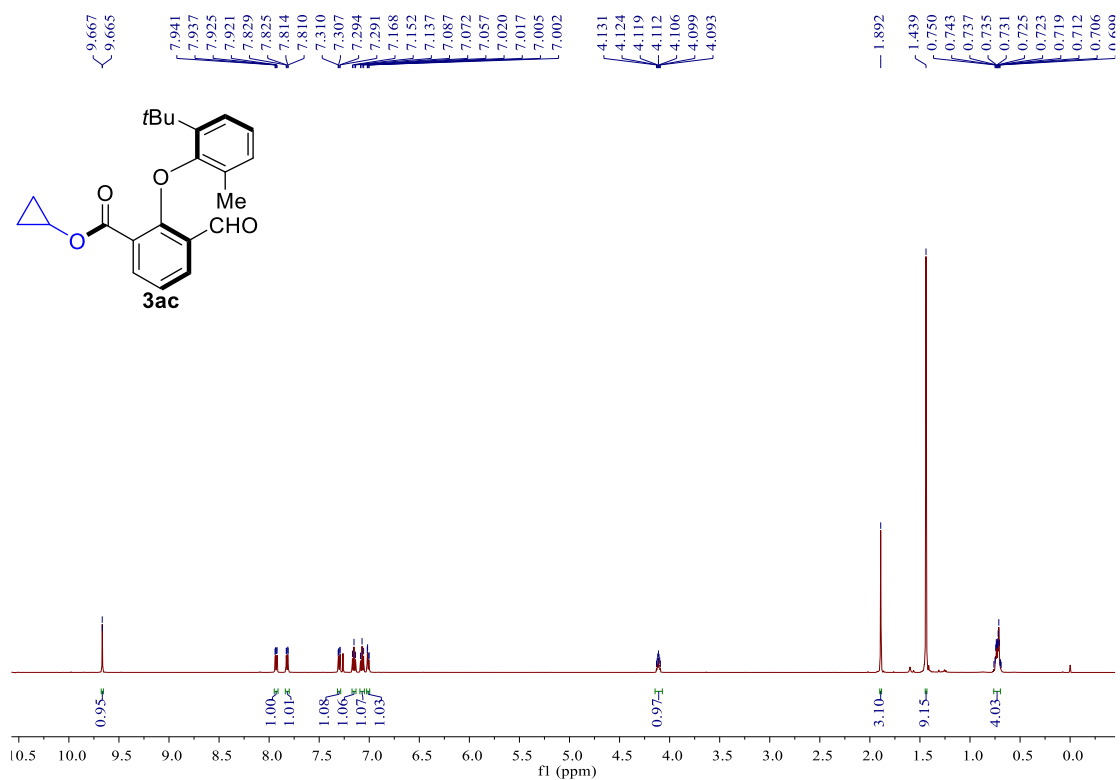

$^1\text{H}$  NMR (500 MHz,  $\text{CDCl}_3$ ) spectrum of **3ac**.

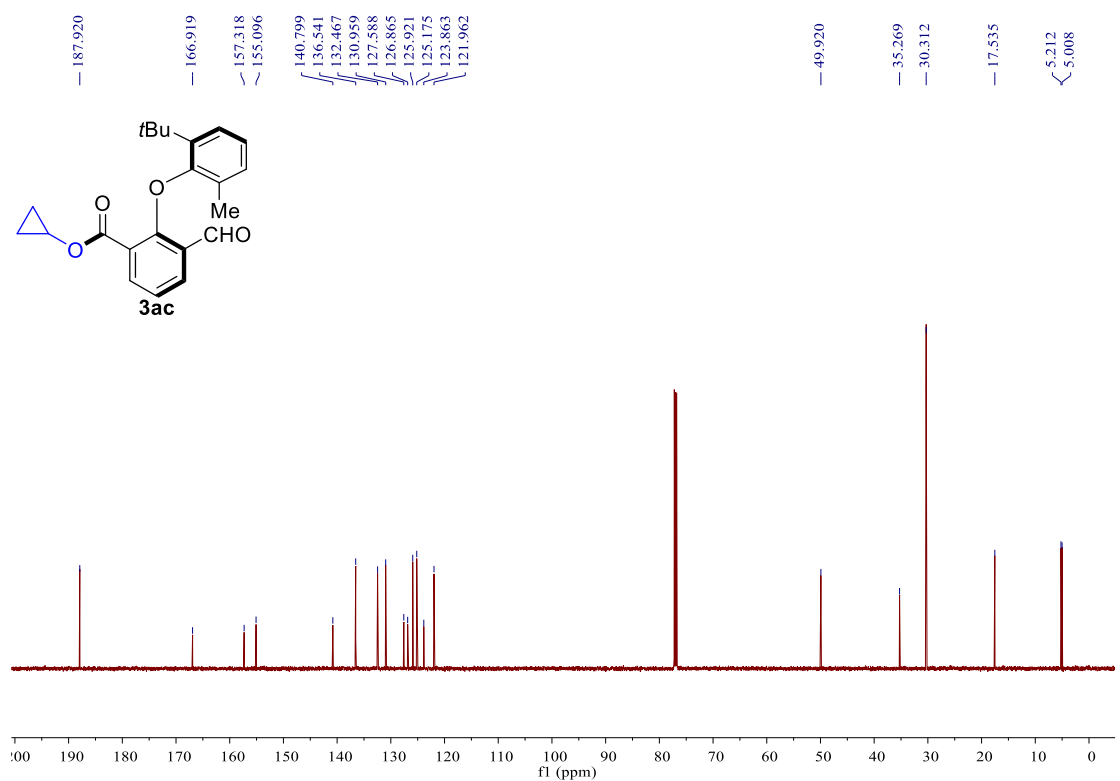

$^{13}\text{C}$  NMR (150 MHz,  $\text{CDCl}_3$ ) spectrum of **3ac**.

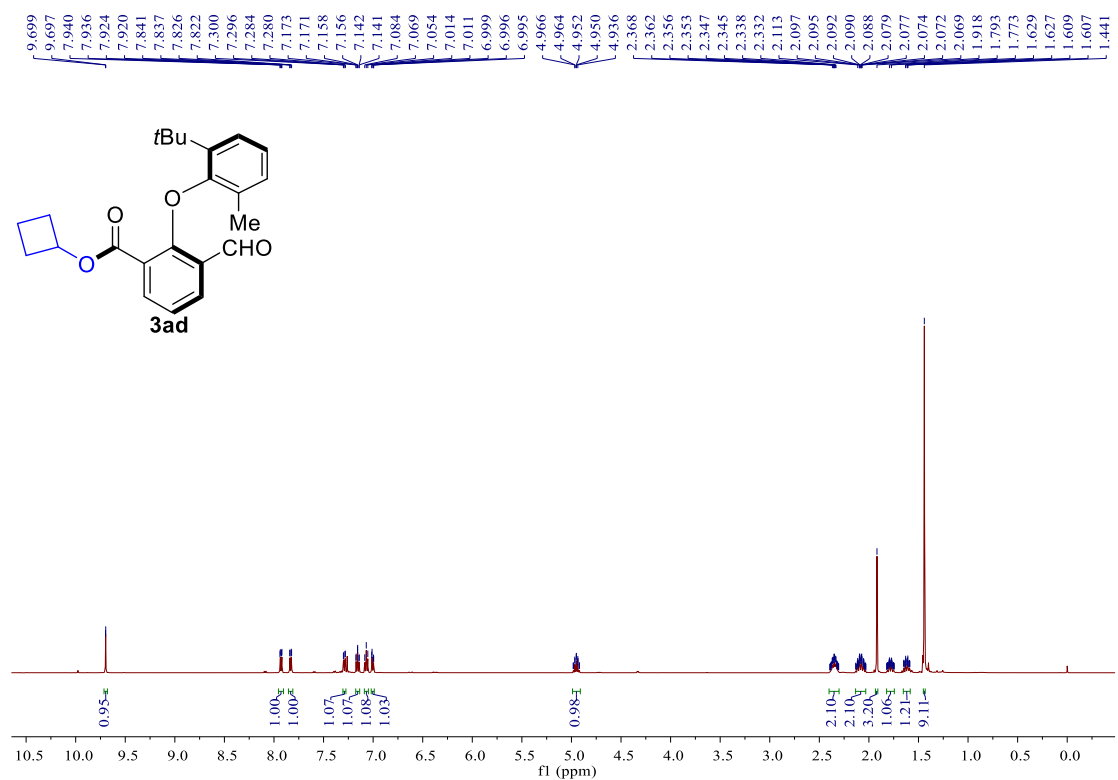

**<sup>1</sup>H NMR (500 MHz, CDCl<sub>3</sub>) spectrum of 3ad.**

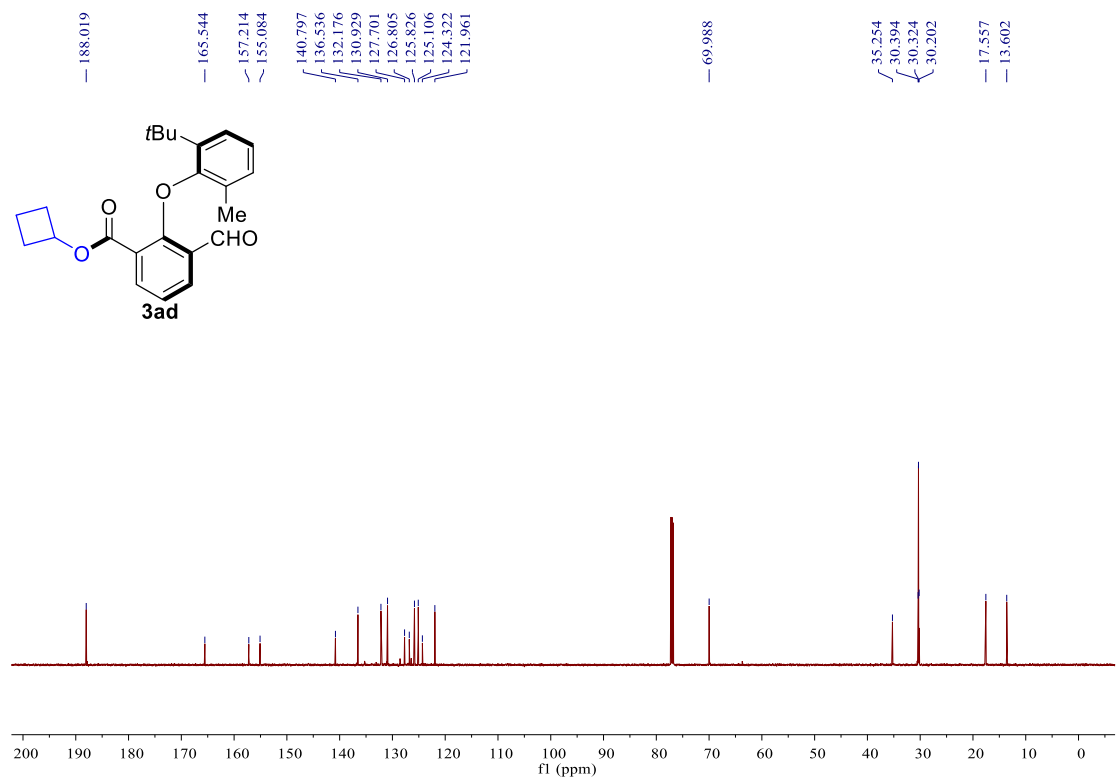

**<sup>13</sup>C NMR (150 MHz, CDCl<sub>3</sub>) spectrum of 3ad.**

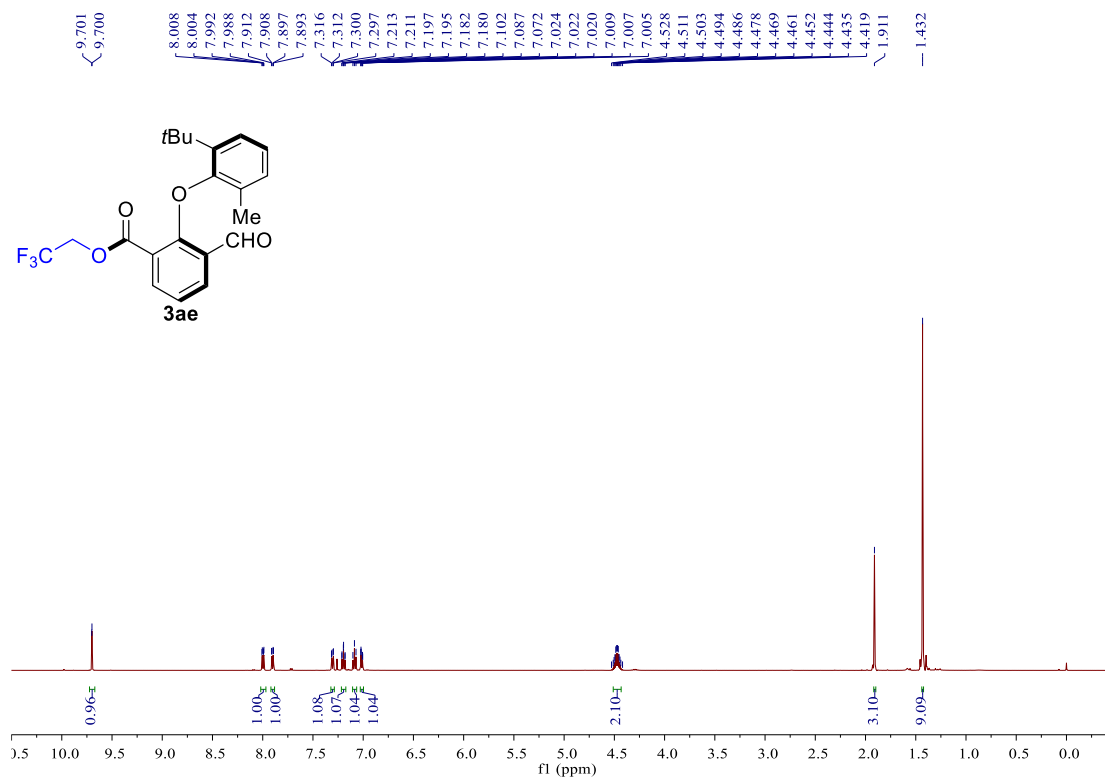

$^1\text{H}$  NMR (500 MHz,  $\text{CDCl}_3$ ) spectrum of **3ae**.

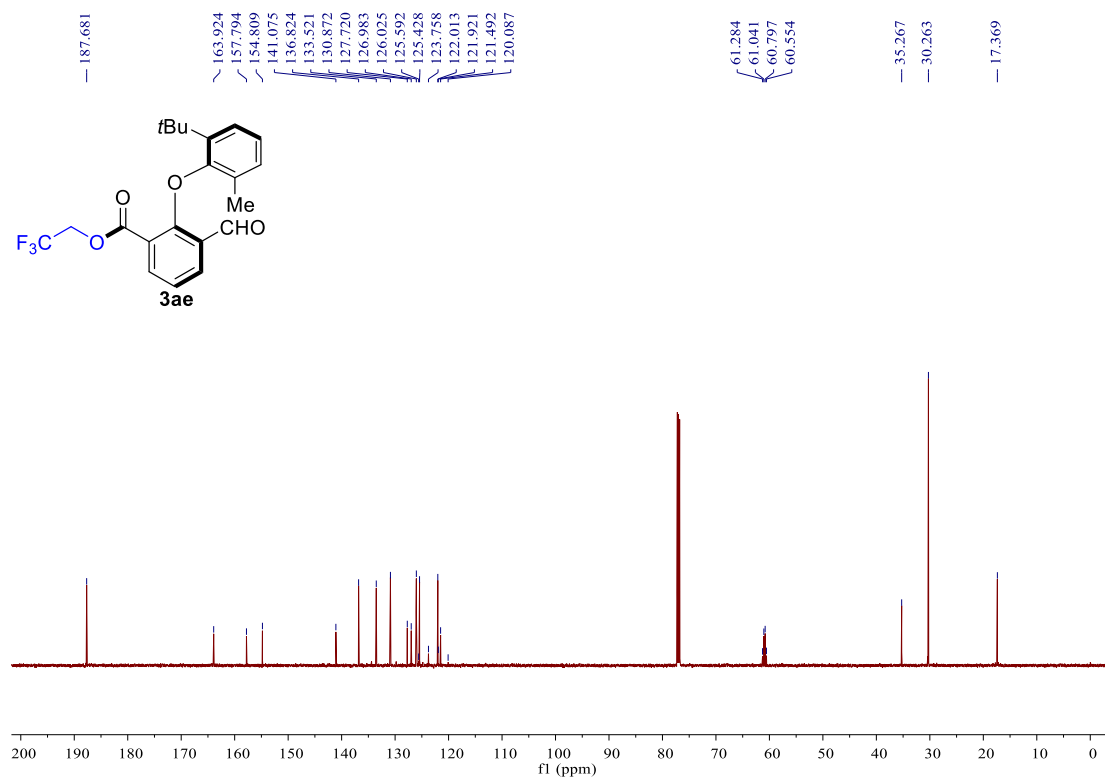

$^{13}\text{C}$  NMR (150 MHz,  $\text{CDCl}_3$ ) spectrum of **3ae**.

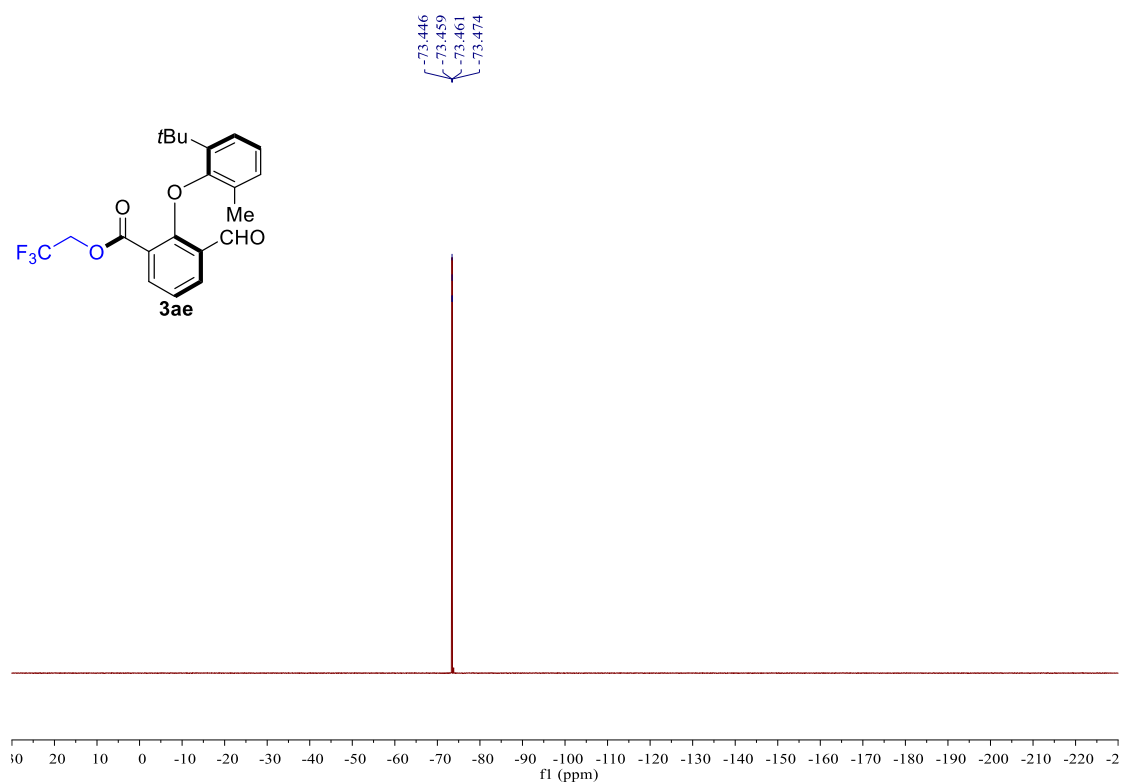

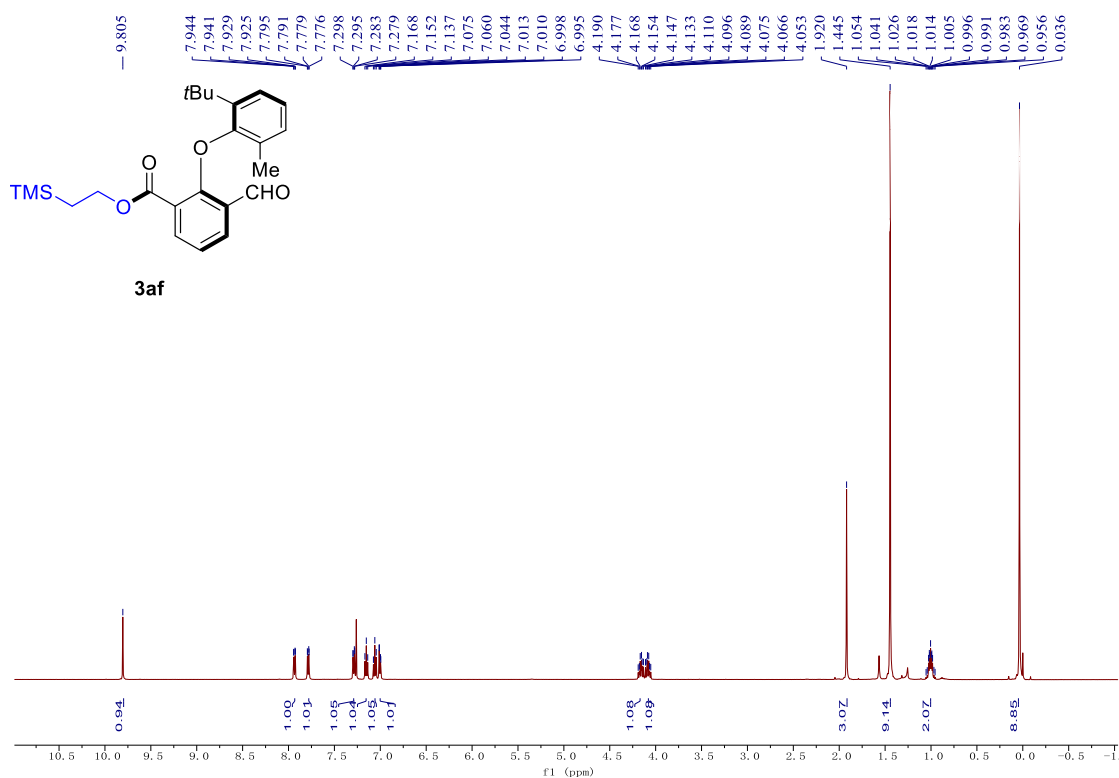

**<sup>1</sup>H NMR (500 MHz, CDCl<sub>3</sub>) spectrum of 3af.**

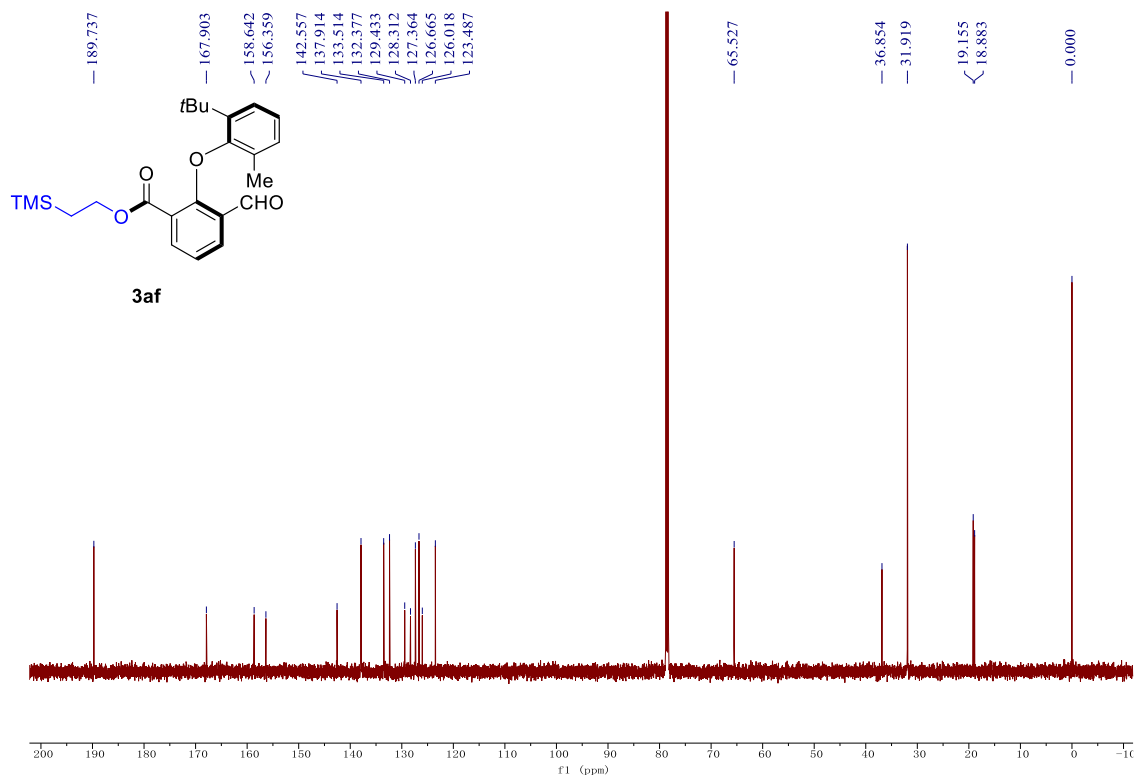

**<sup>13</sup>C NMR (150 MHz, CDCl<sub>3</sub>) spectrum of 3af.**

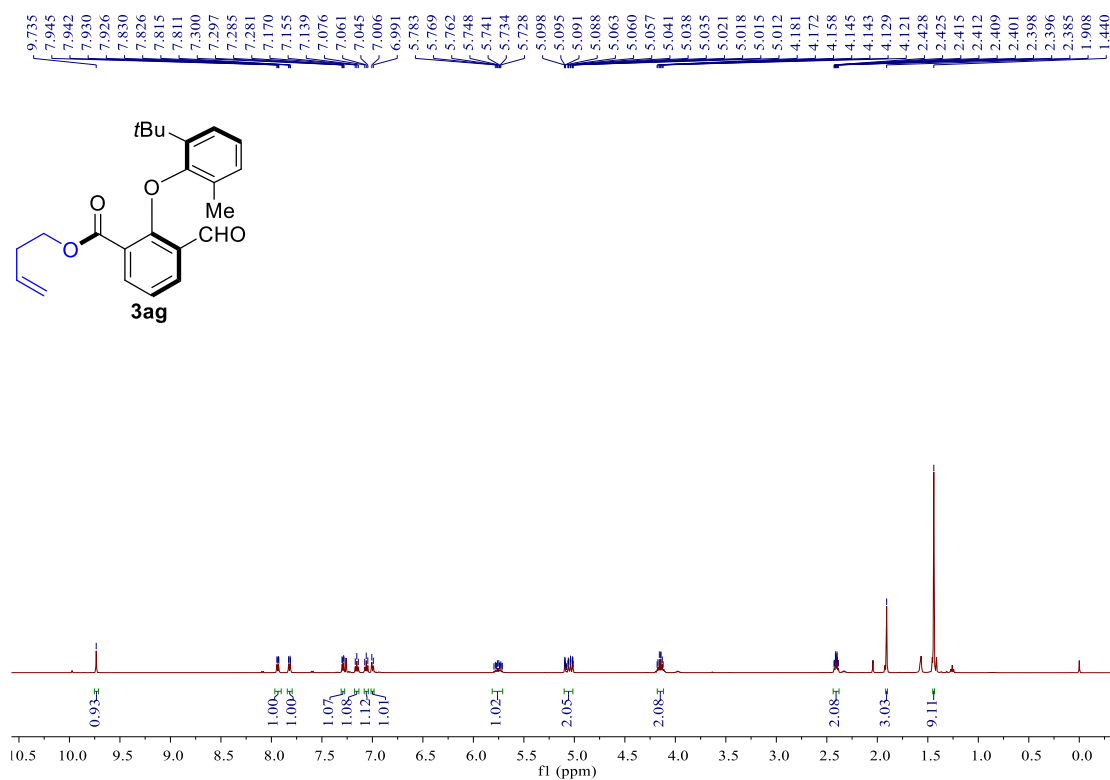

$^1\text{H}$  NMR (500 MHz,  $\text{CDCl}_3$ ) spectrum of **3ag**.

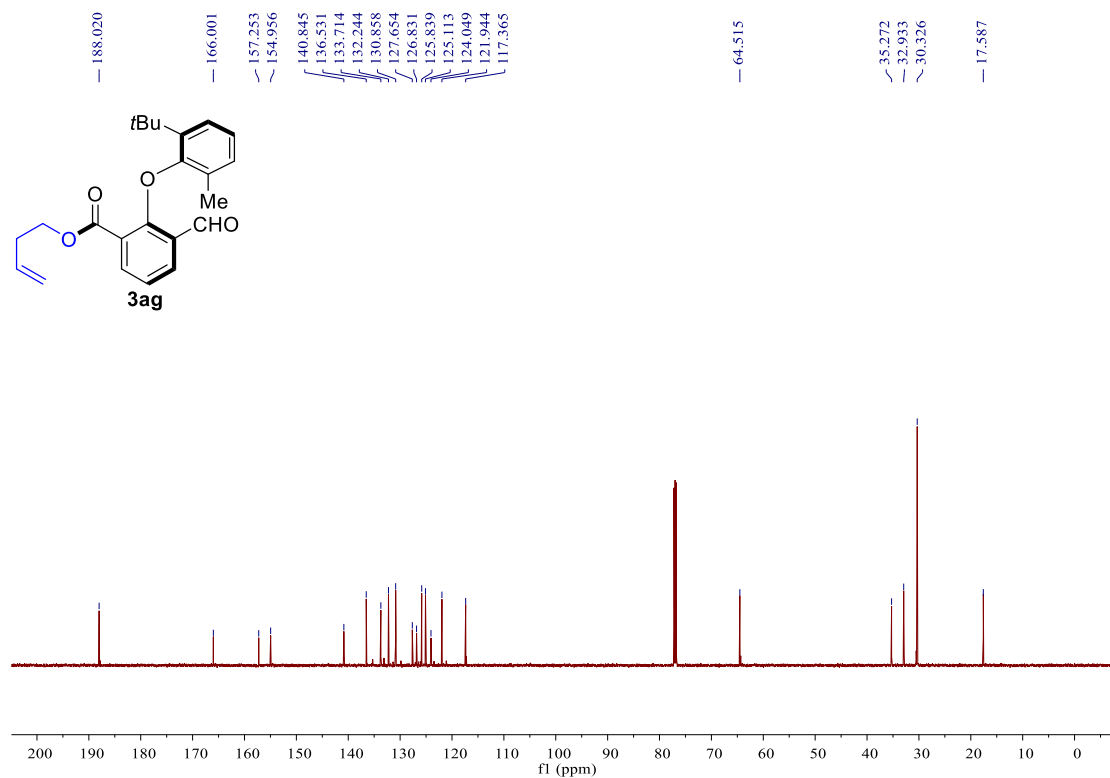

$^{13}\text{C}$  NMR (150 MHz,  $\text{CDCl}_3$ ) spectrum of **3ag**.

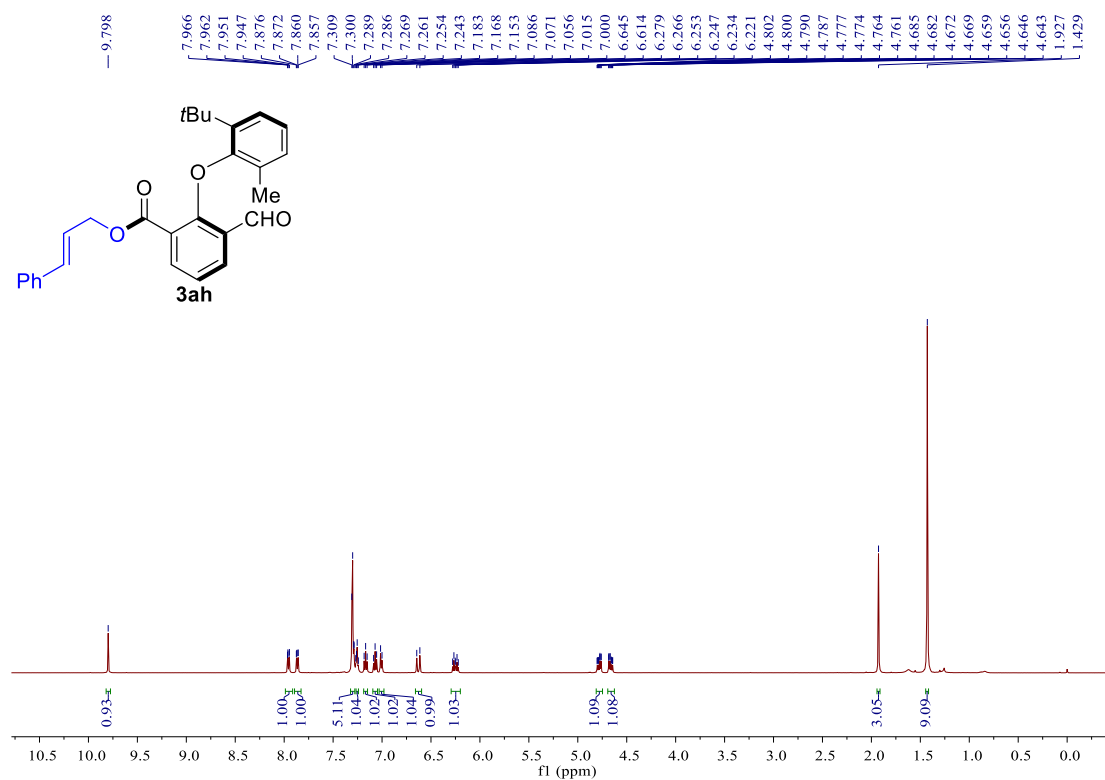

**<sup>1</sup>H NMR (500 MHz, CDCl<sub>3</sub>) spectrum of 3ah.**

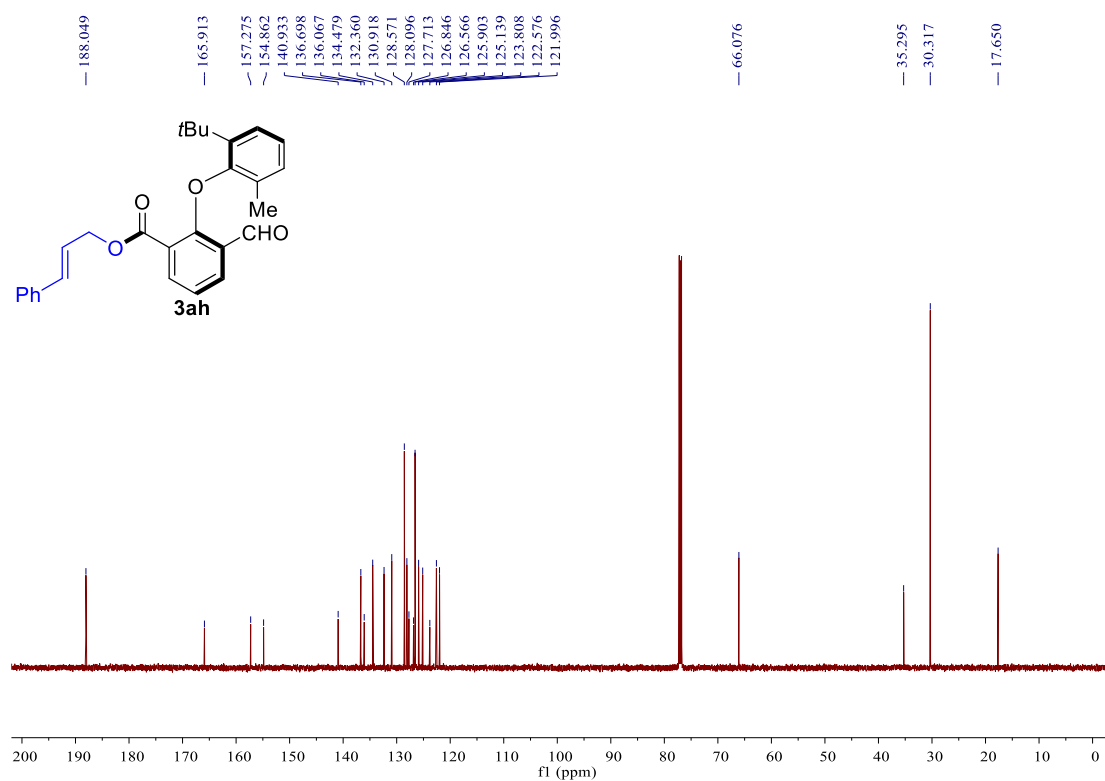

**<sup>13</sup>C NMR (150 MHz, CDCl<sub>3</sub>) spectrum of 3ah.**

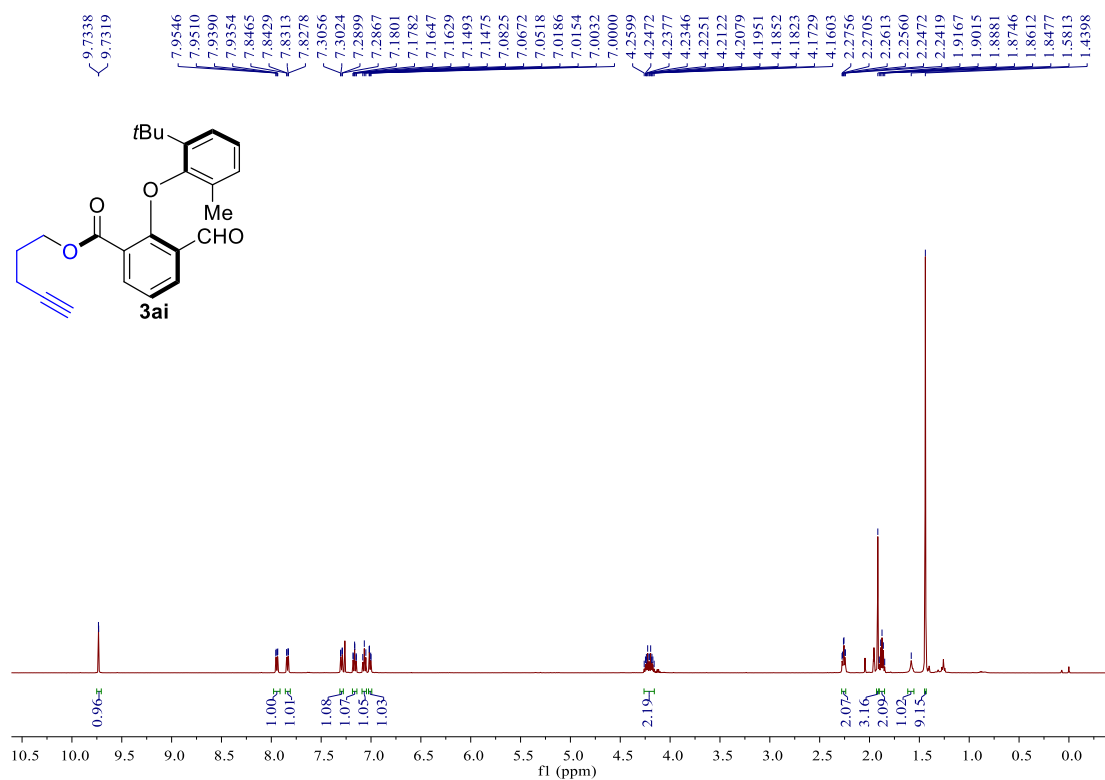

$^1\text{H}$  NMR (500 MHz,  $\text{CDCl}_3$ ) spectrum of **3ai**.

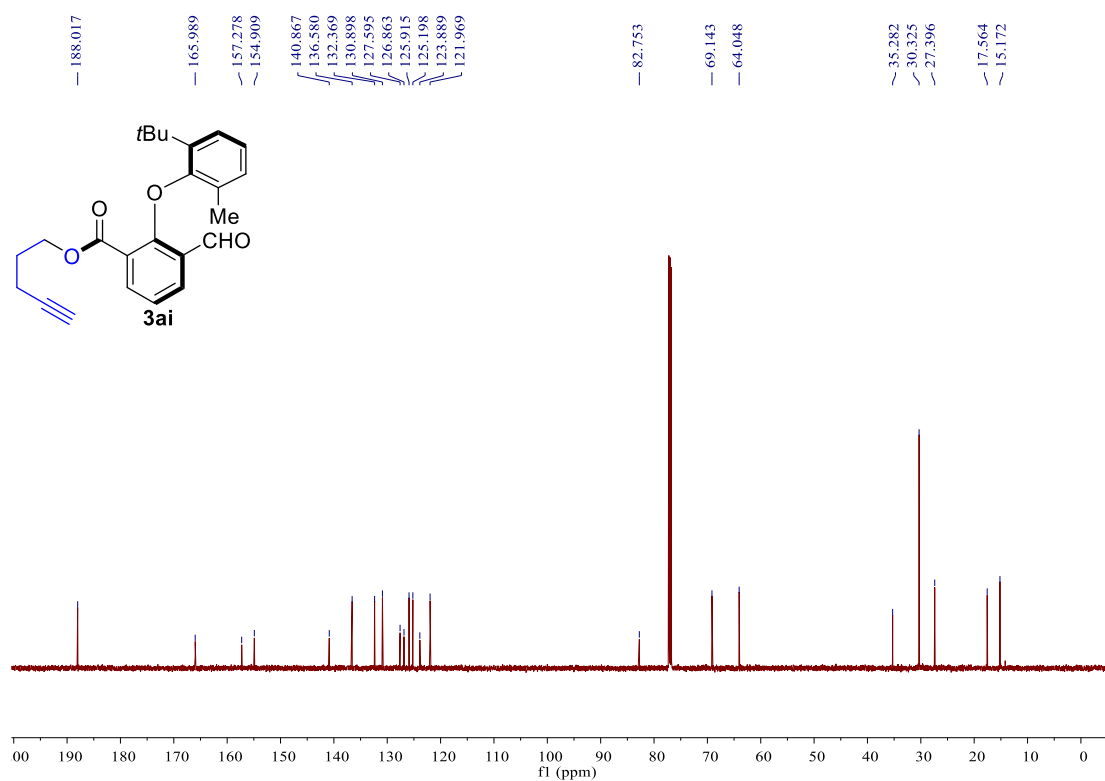

$^{13}\text{C}$  NMR (150 MHz,  $\text{CDCl}_3$ ) spectrum of **3ai**.

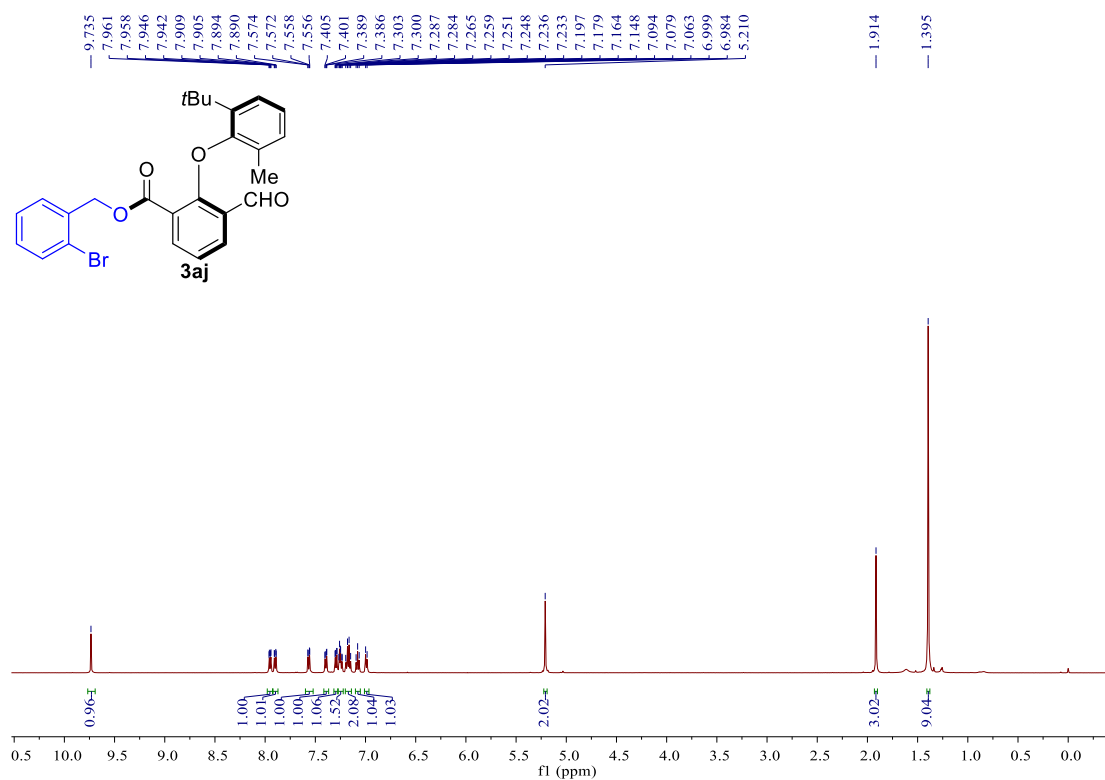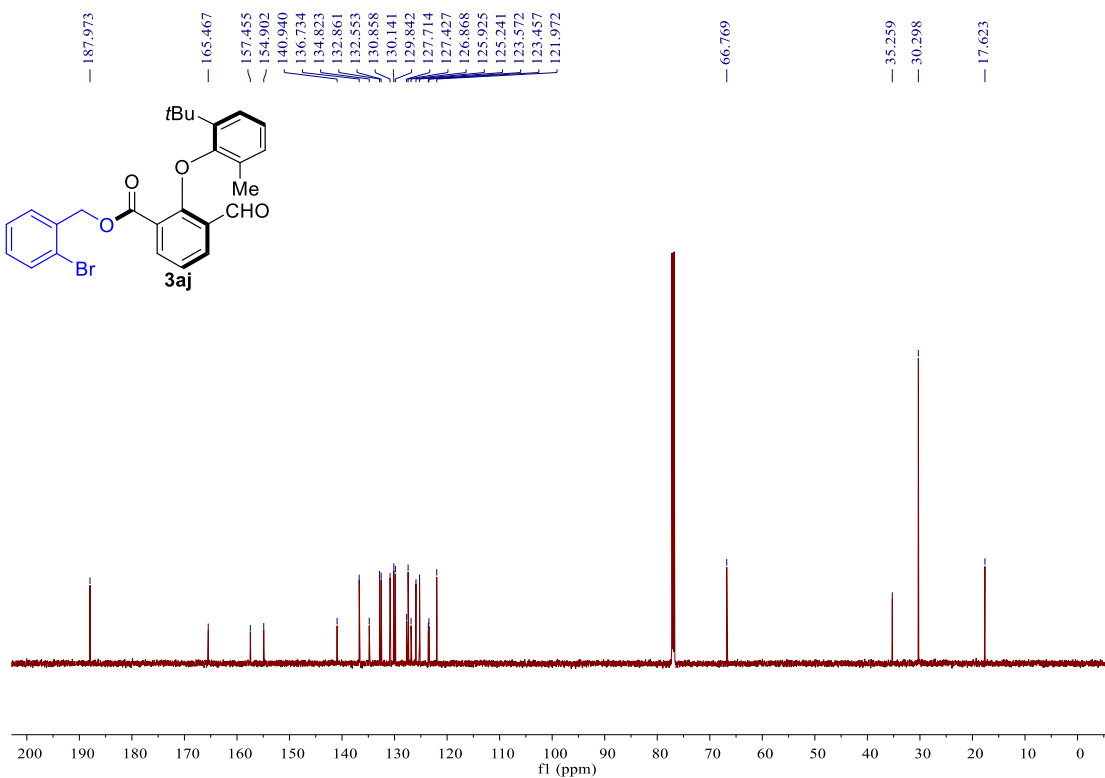

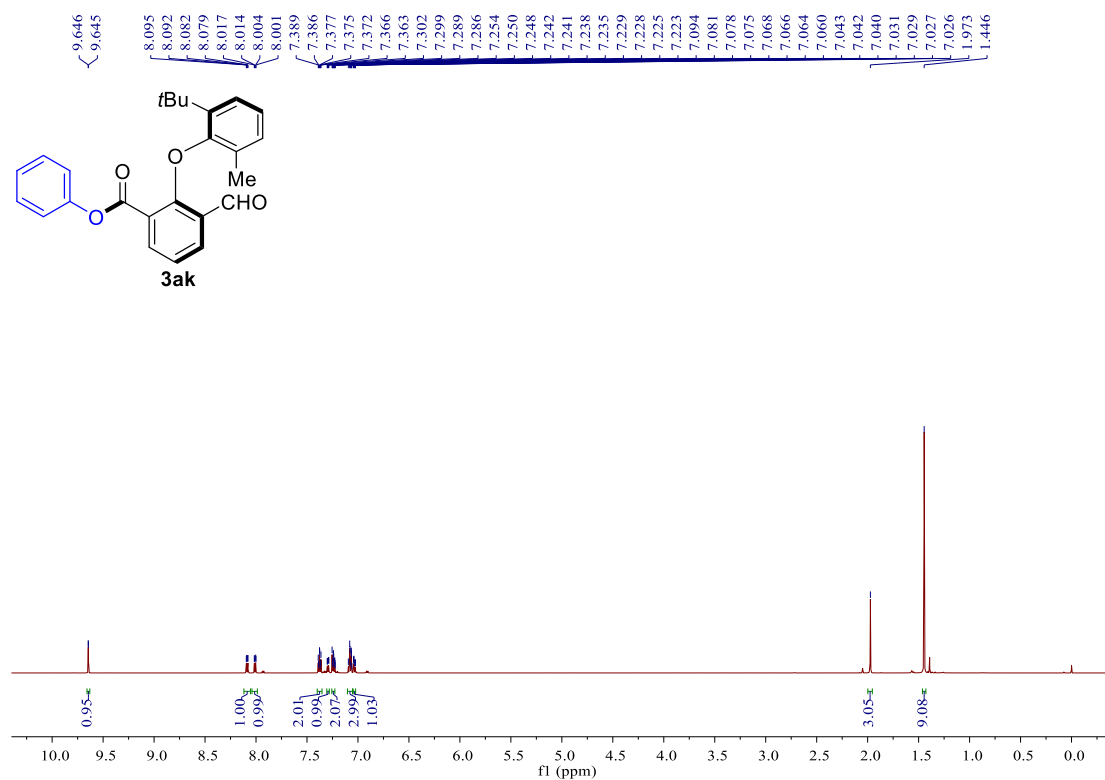

**<sup>1</sup>H NMR (600 MHz, CDCl<sub>3</sub>) spectrum of **3ak**.**

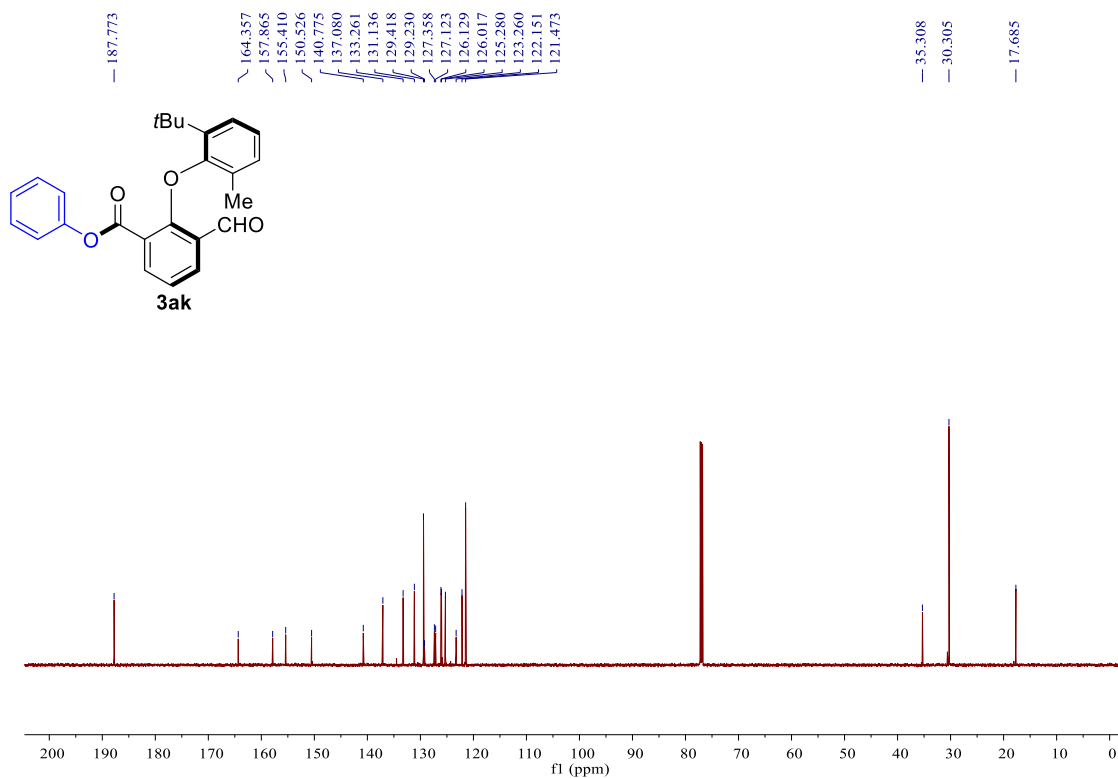

**<sup>13</sup>C NMR (150 MHz, CDCl<sub>3</sub>) spectrum of **3ak**.**

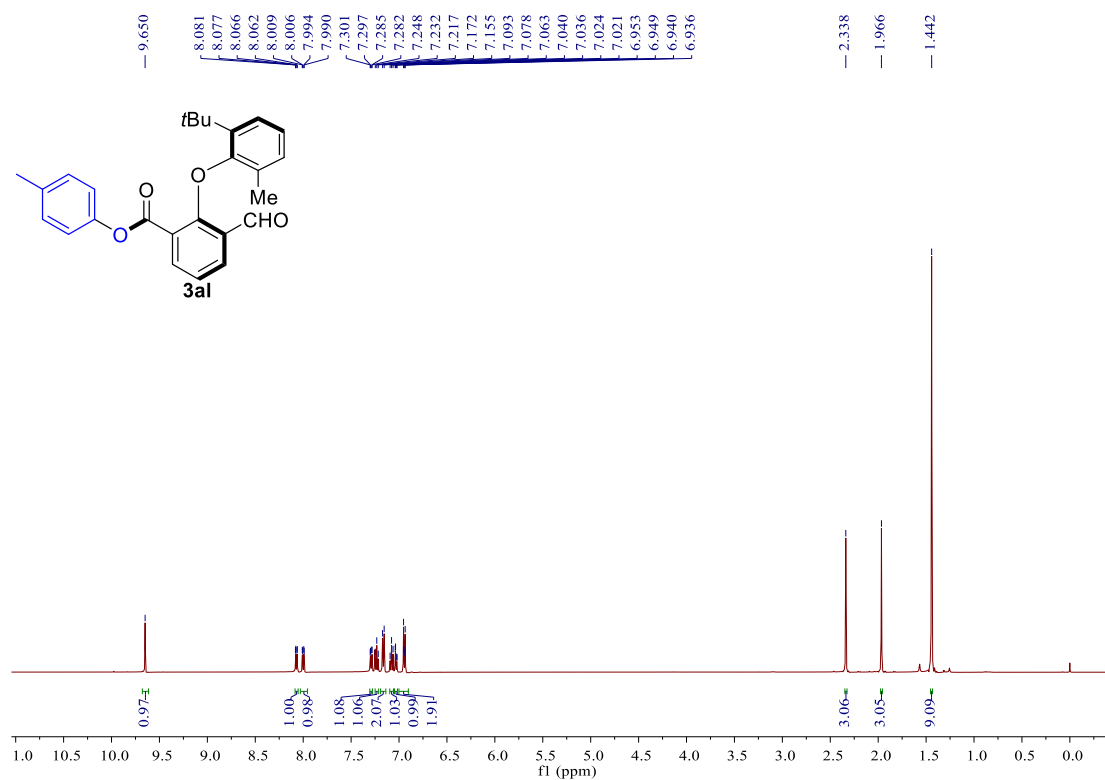

**<sup>1</sup>H NMR (500 MHz, CDCl<sub>3</sub>) spectrum of 3al.**

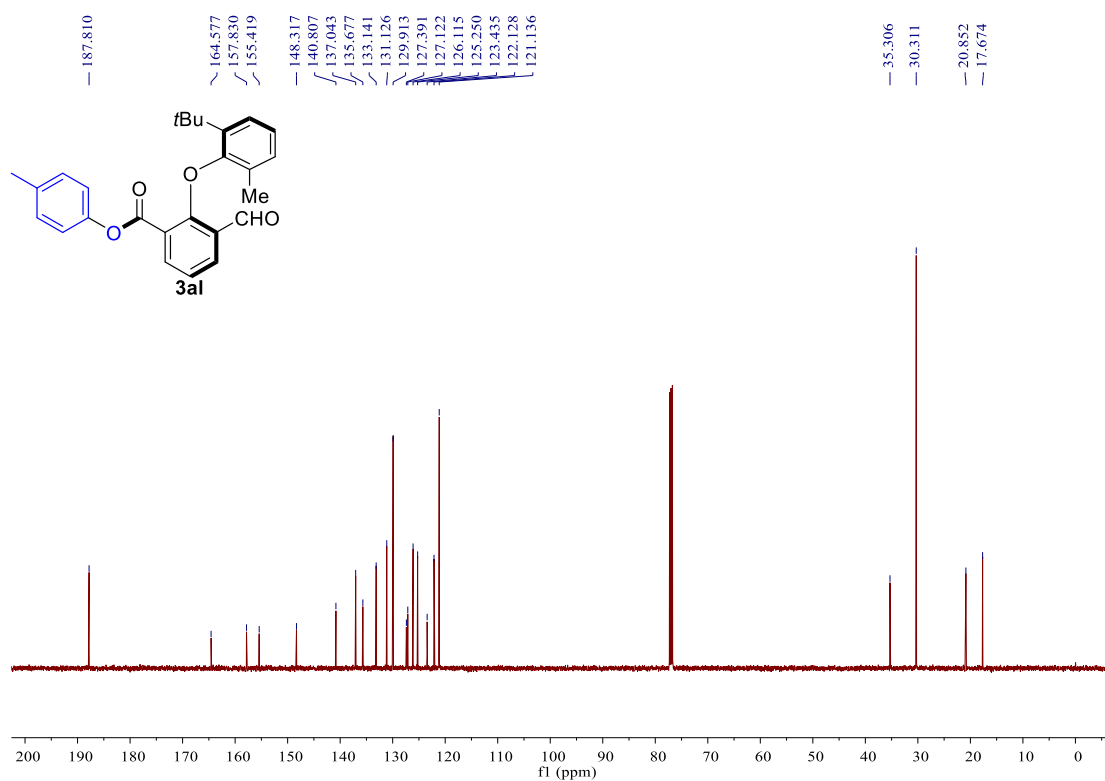

**<sup>13</sup>C NMR (125 MHz, CDCl<sub>3</sub>) spectrum of 3al.**

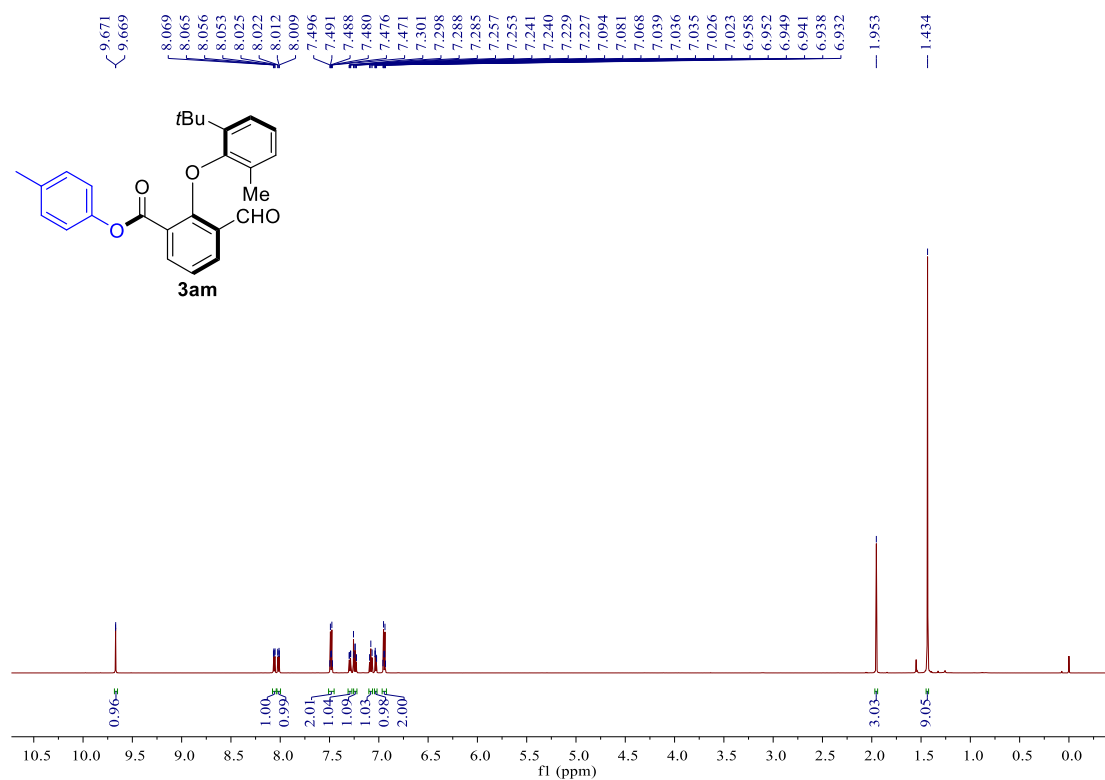

**<sup>1</sup>H NMR (600 MHz, CDCl<sub>3</sub>) spectrum of 3am.**

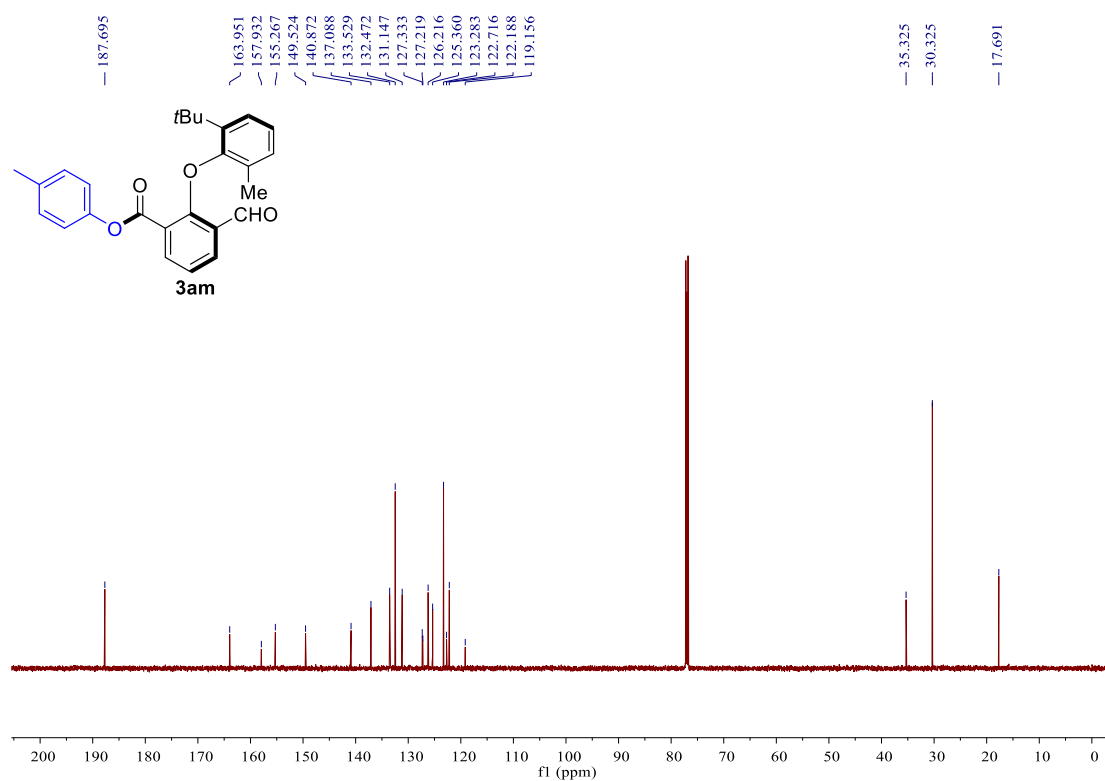

**<sup>13</sup>C NMR (150 MHz, CDCl<sub>3</sub>) spectrum of 3am.**

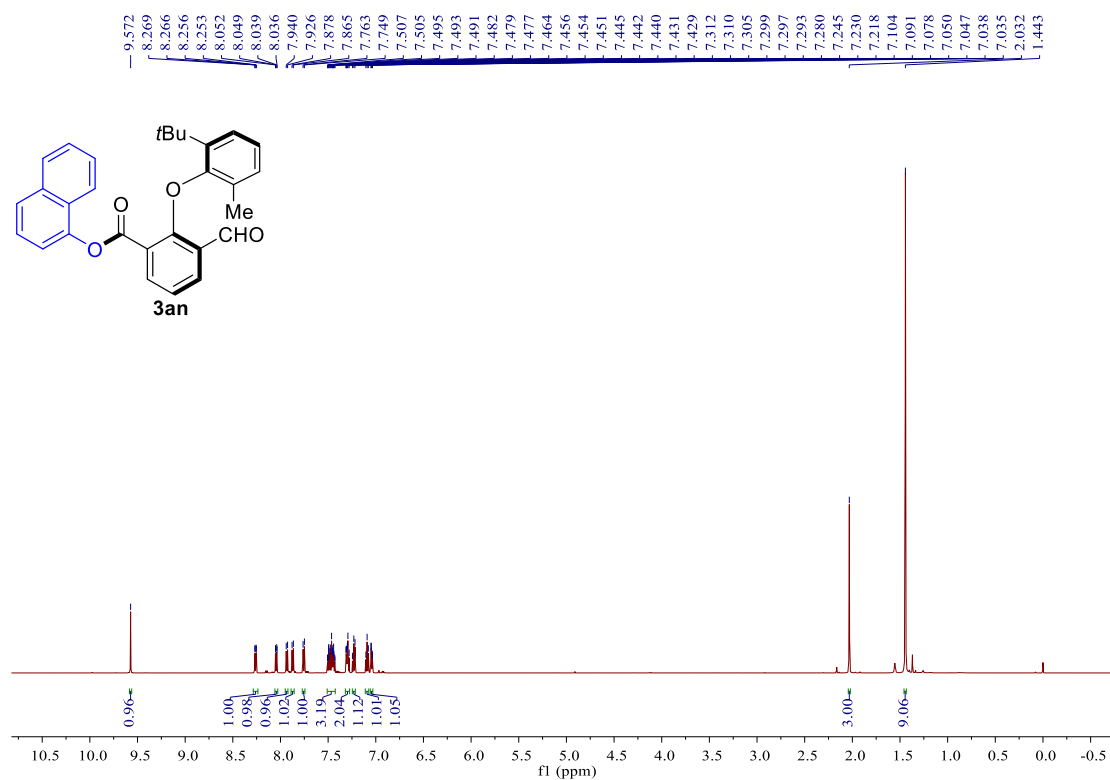

**<sup>1</sup>H NMR (600 MHz, CDCl<sub>3</sub>) spectrum of 3an.**

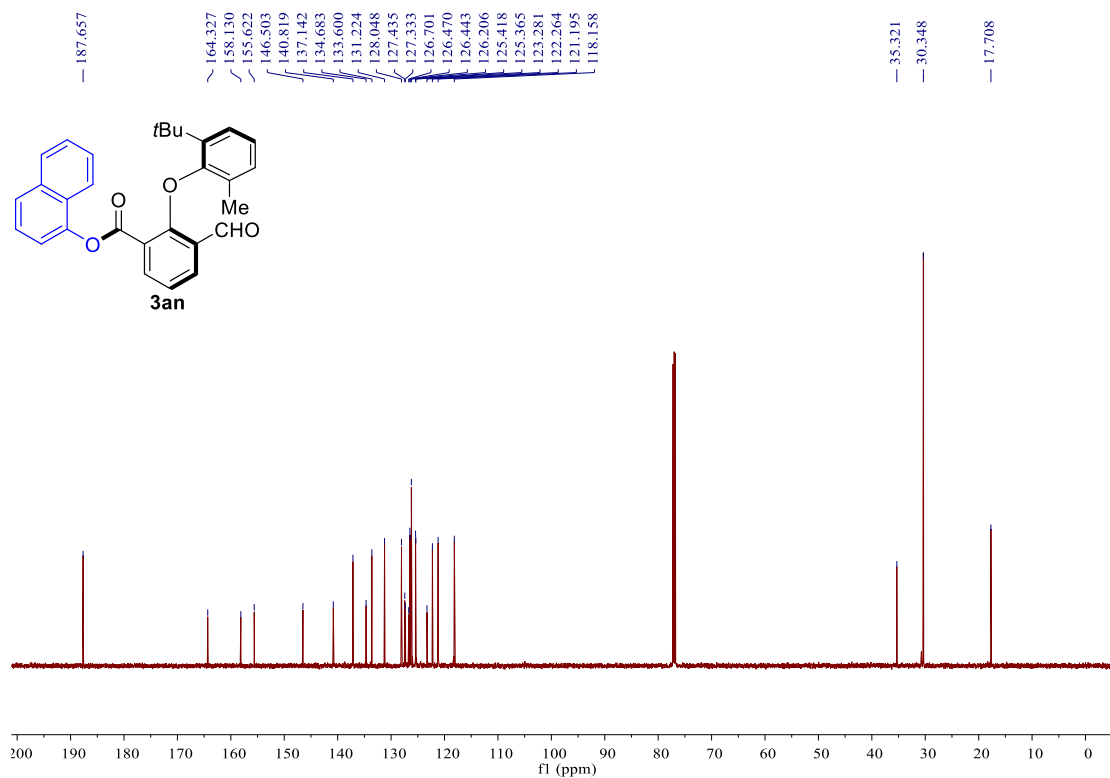

**<sup>13</sup>C NMR (150 MHz, CDCl<sub>3</sub>) spectrum of 3an.**

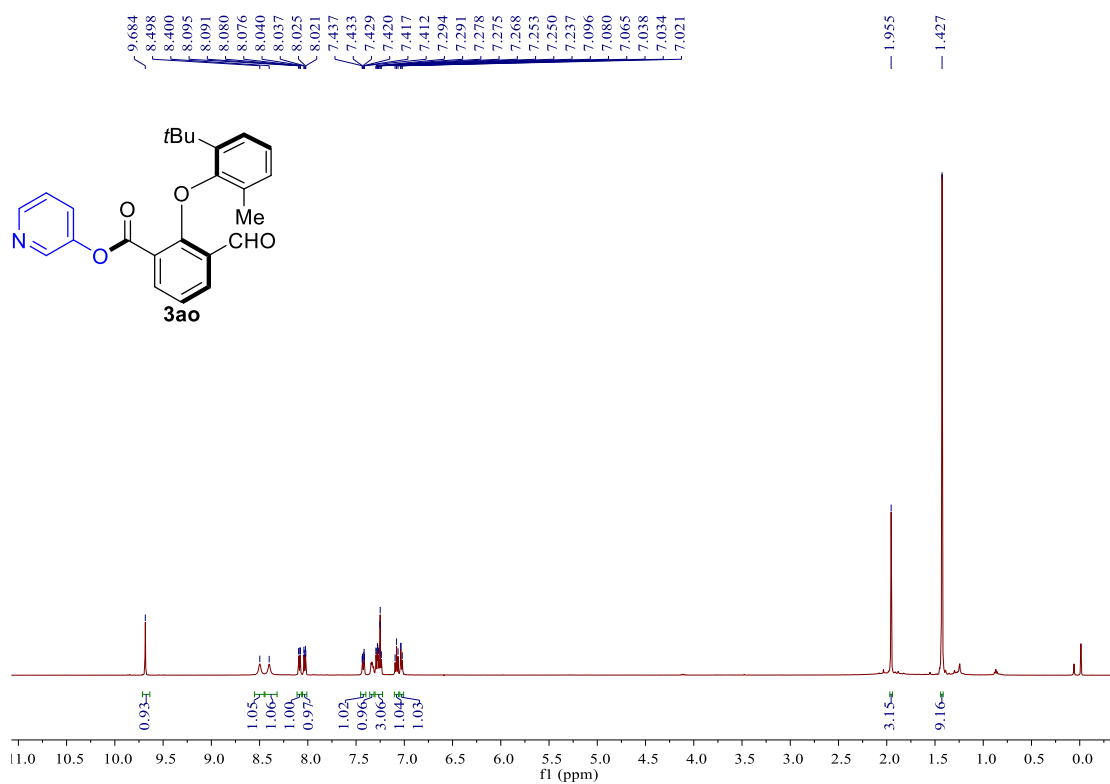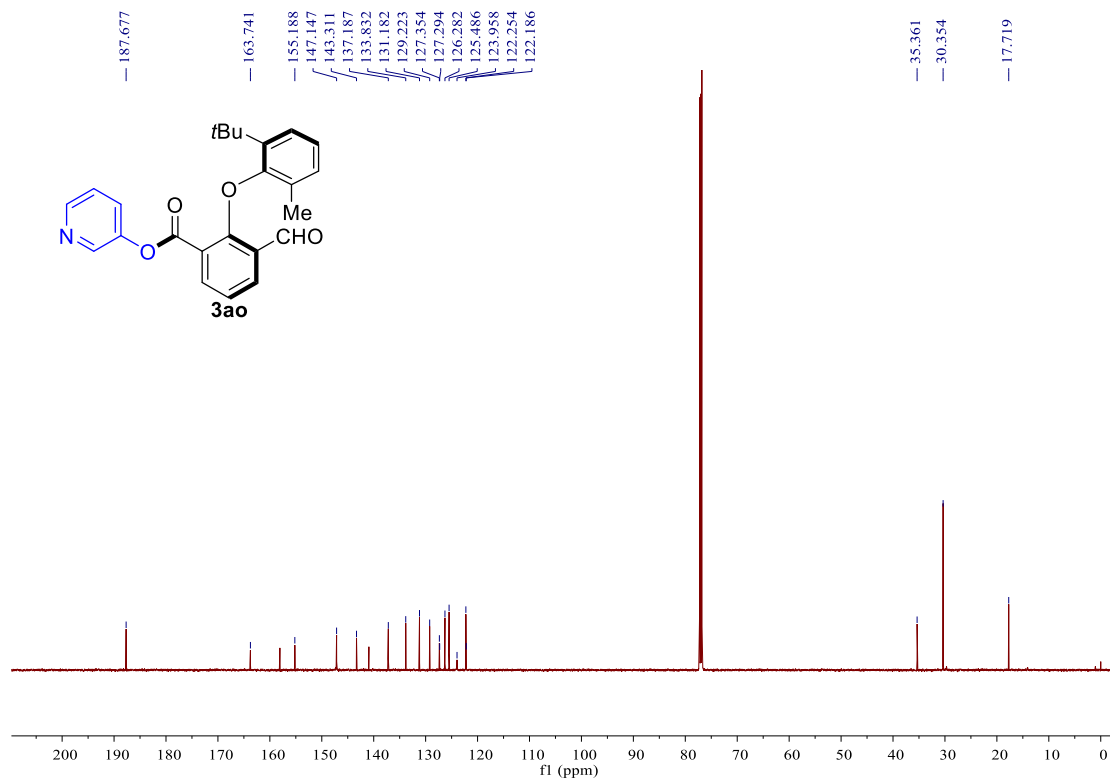

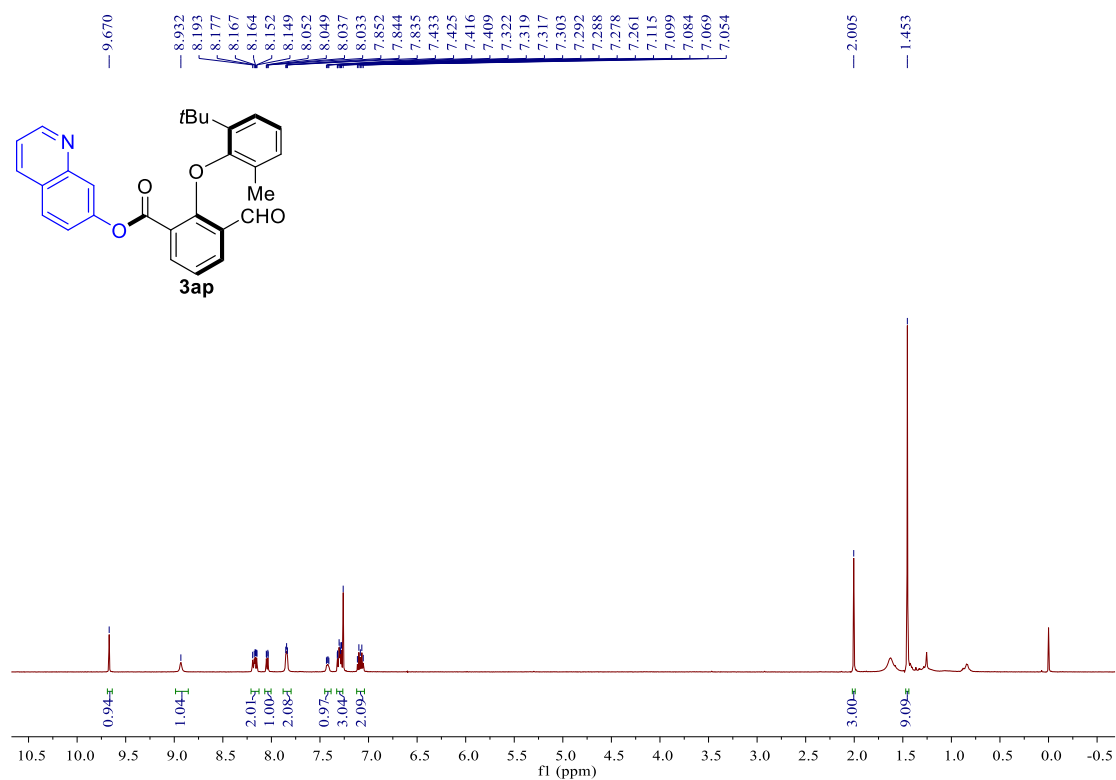

**<sup>1</sup>H NMR (500 MHz, CDCl<sub>3</sub>) spectrum of 3ap.**

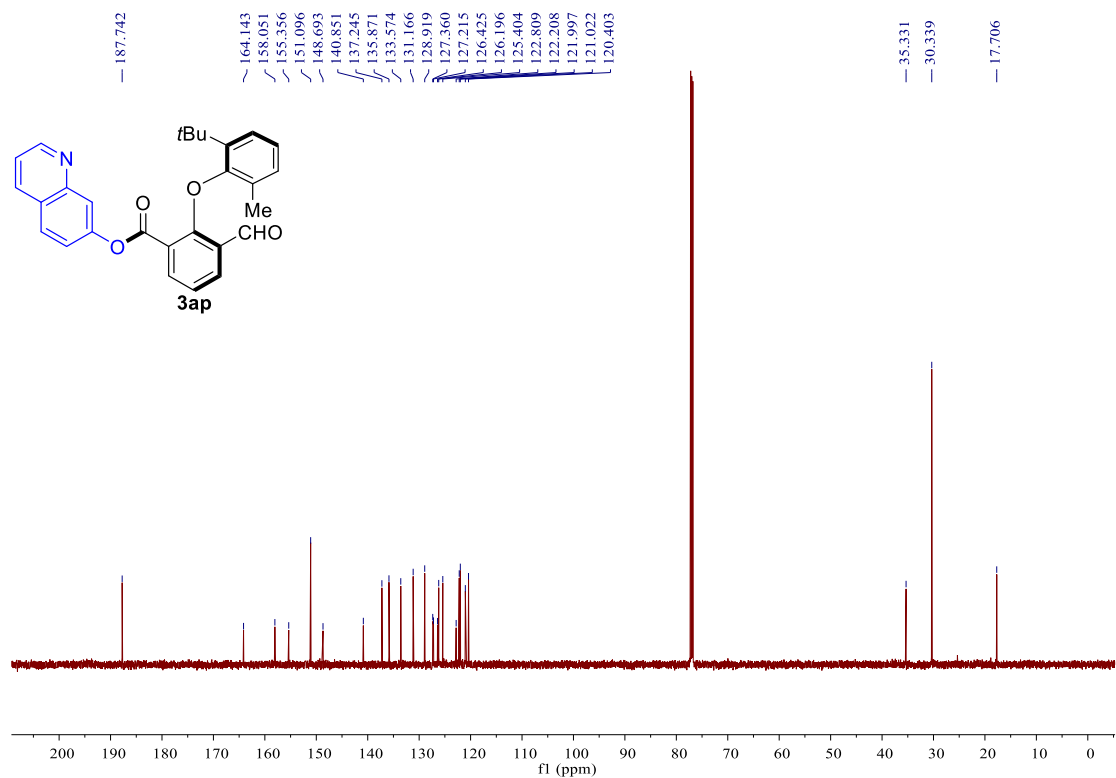

**<sup>13</sup>C NMR (150 MHz, CDCl<sub>3</sub>) spectrum of 3ap.**

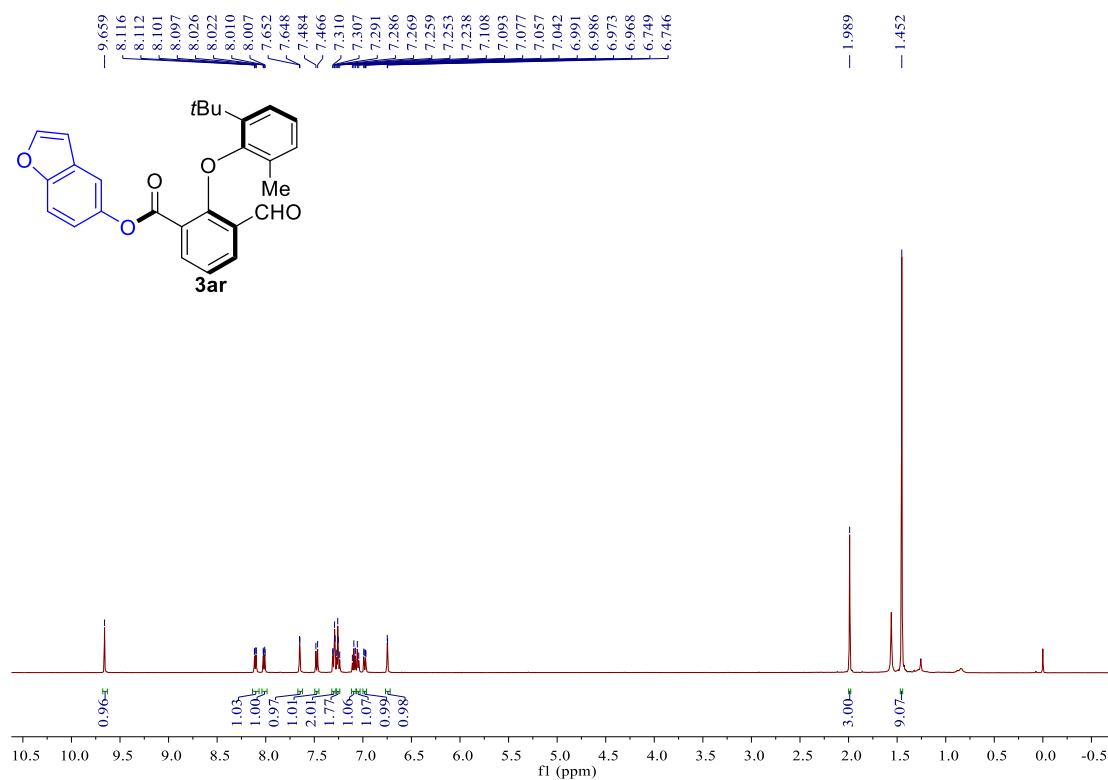

**<sup>1</sup>H NMR (500 MHz, CDCl<sub>3</sub>) spectrum of 3ar.**

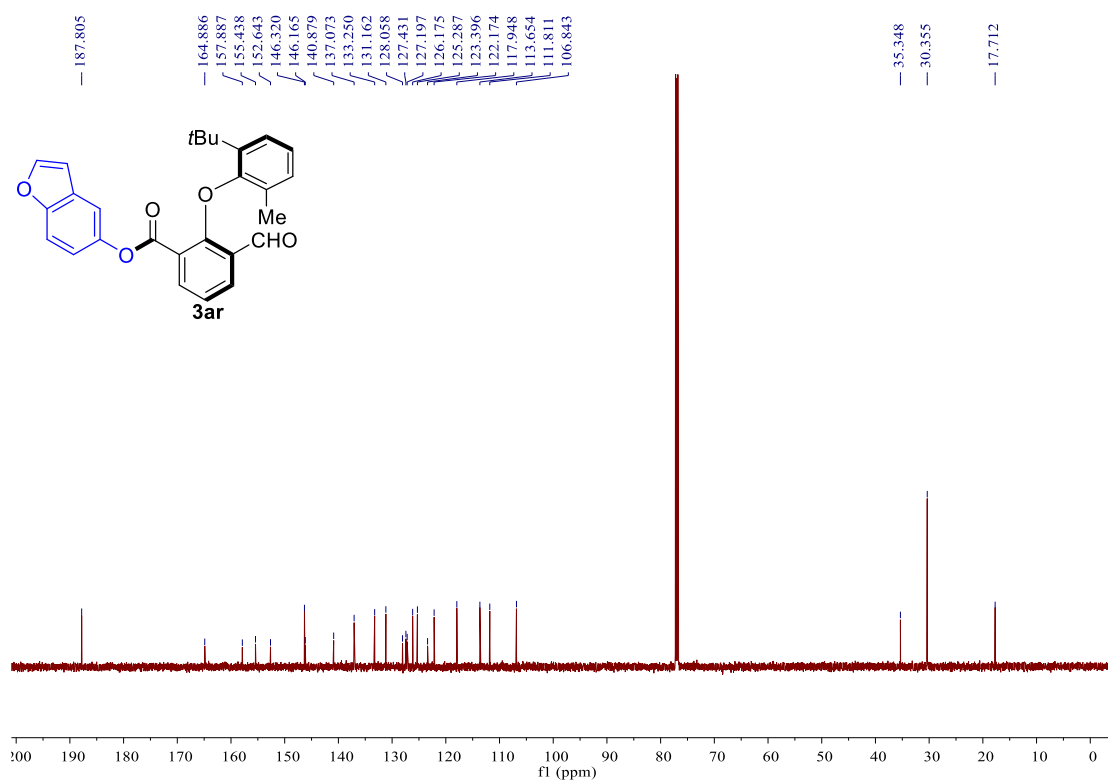

**<sup>13</sup>C NMR (150 MHz, CDCl<sub>3</sub>) spectrum of 3ar.**

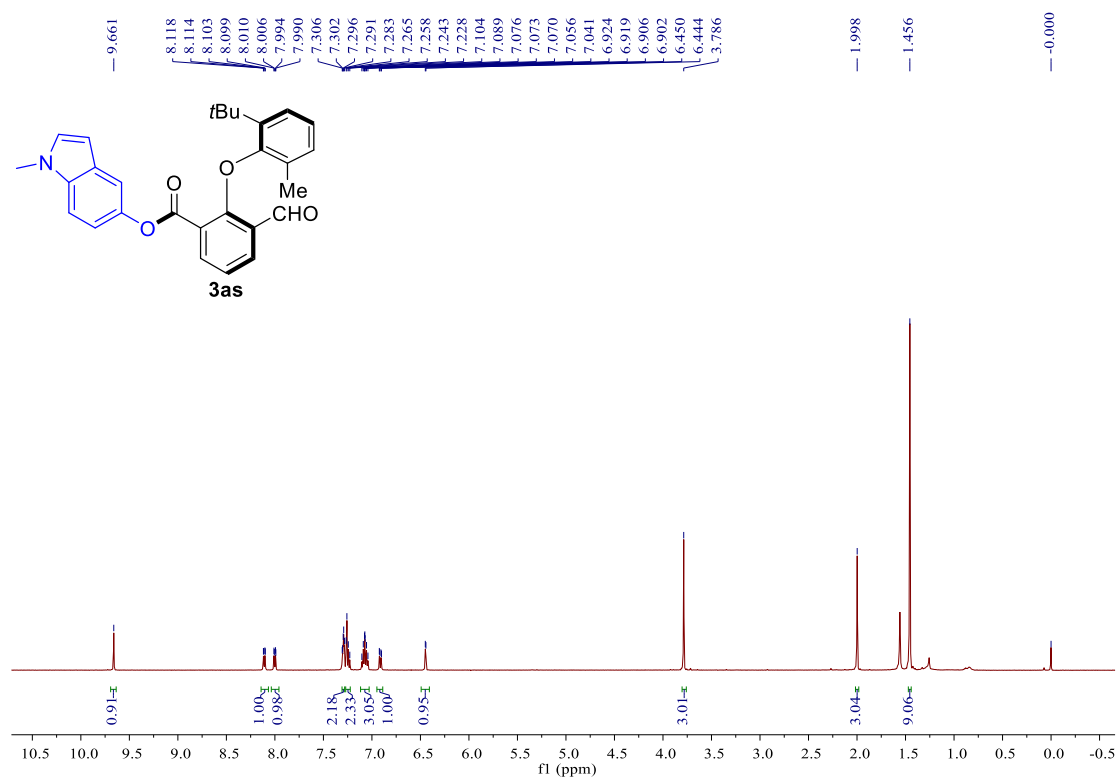

**<sup>1</sup>H NMR (500 MHz, CDCl<sub>3</sub>) spectrum of 3as.**

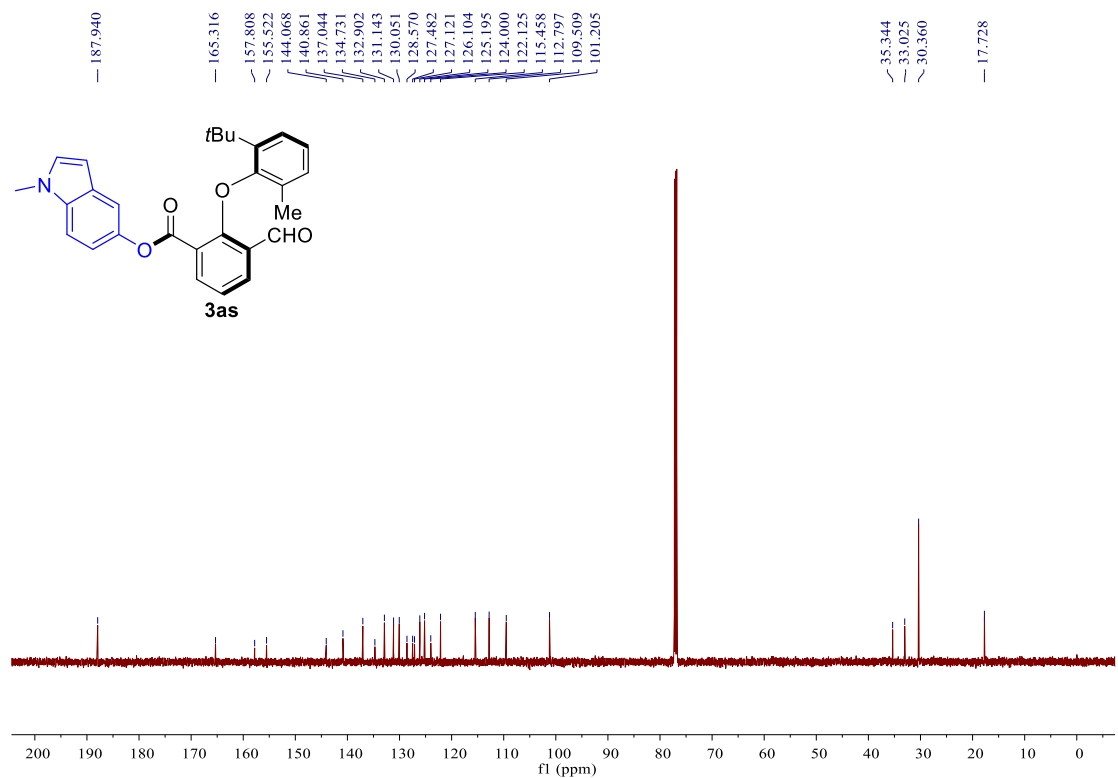

**<sup>13</sup>C NMR (150 MHz, CDCl<sub>3</sub>) spectrum of 3as.**

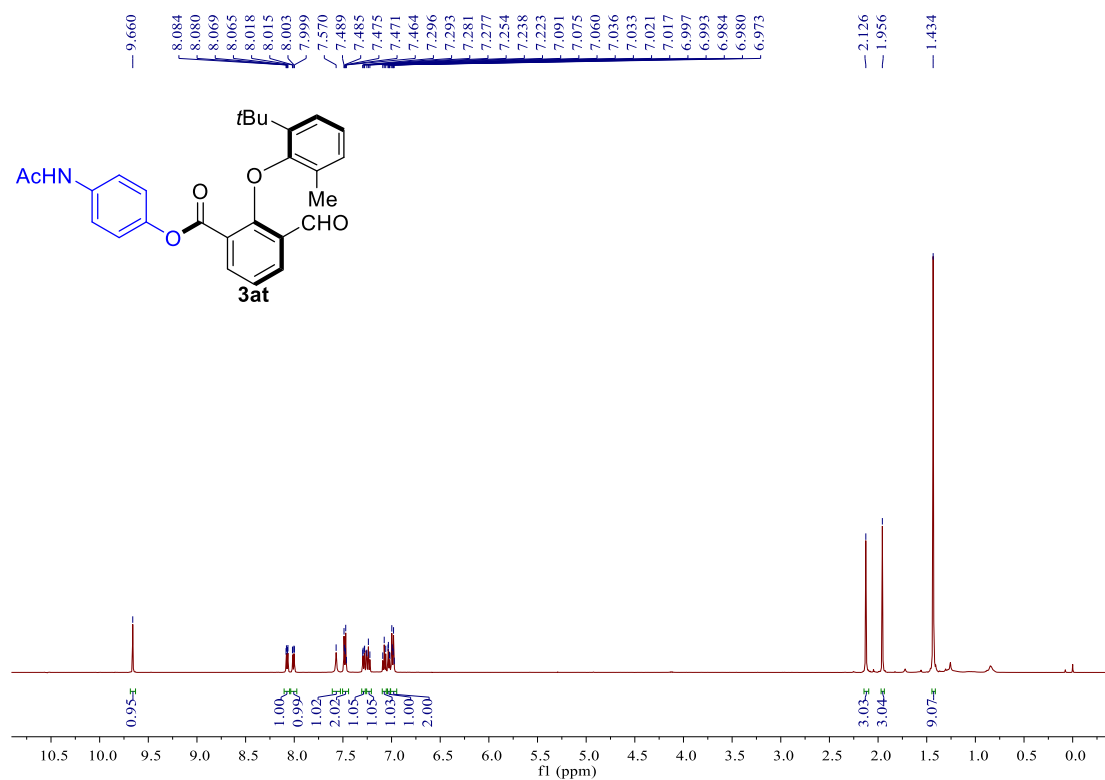

**<sup>1</sup>H NMR (500 MHz, CDCl<sub>3</sub>) spectrum of 3at.**

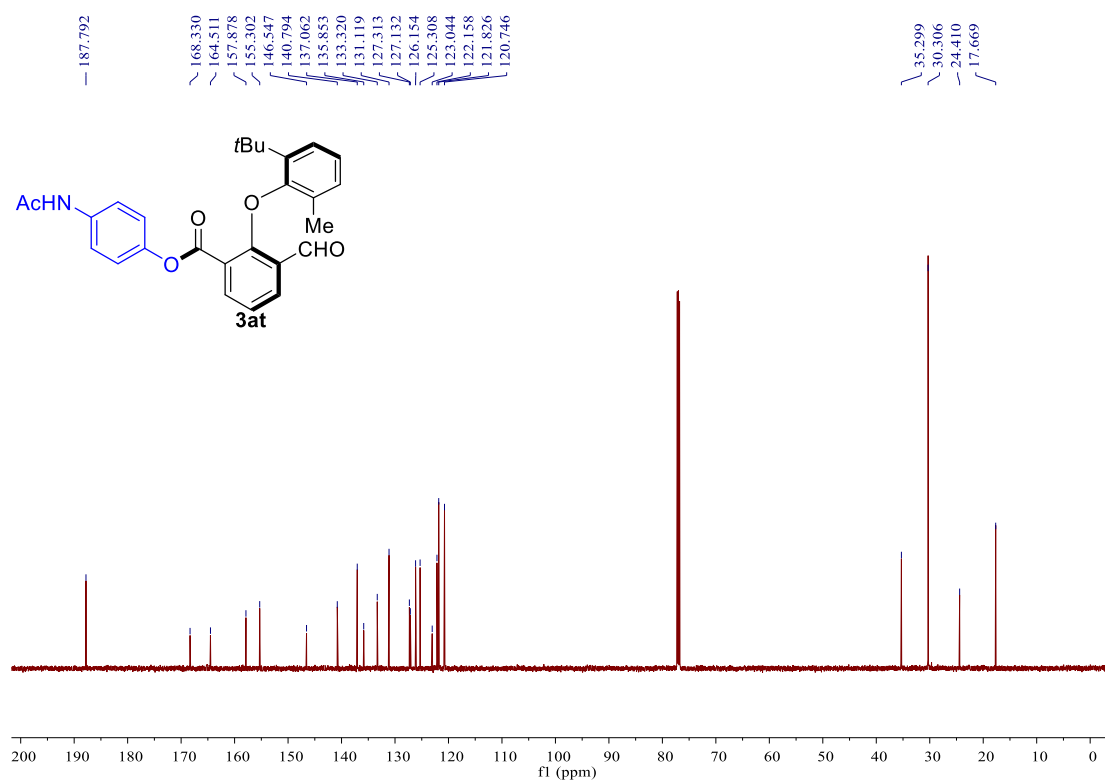

**<sup>13</sup>C NMR (150 MHz, CDCl<sub>3</sub>) spectrum of 3at.**

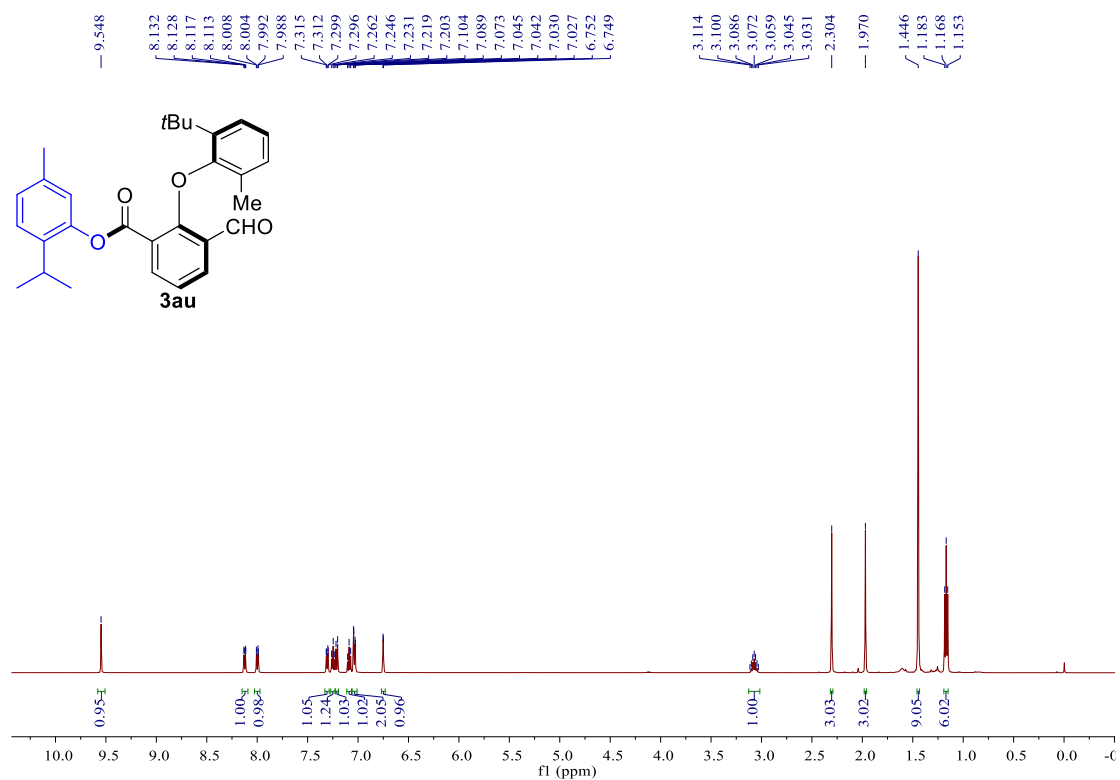

$^1\text{H}$  NMR (500 MHz,  $\text{CDCl}_3$ ) spectrum of **3au**.

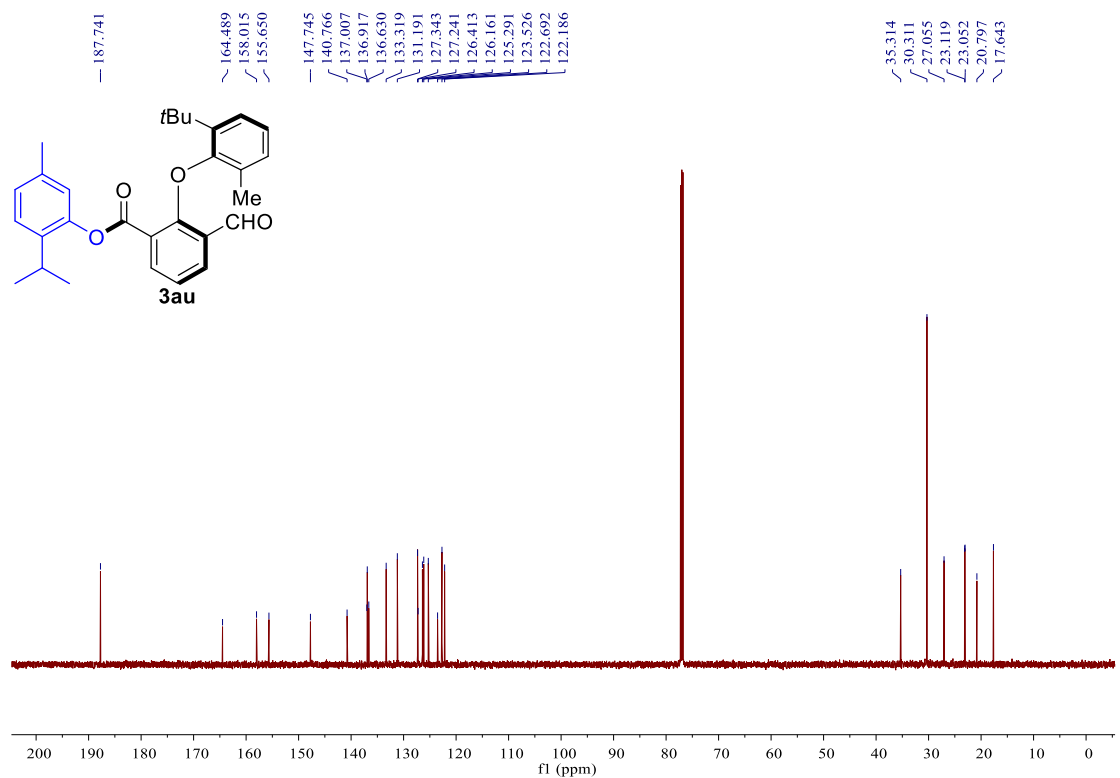

$^{13}\text{C}$  NMR (150 MHz,  $\text{CDCl}_3$ ) spectrum of **3au**.

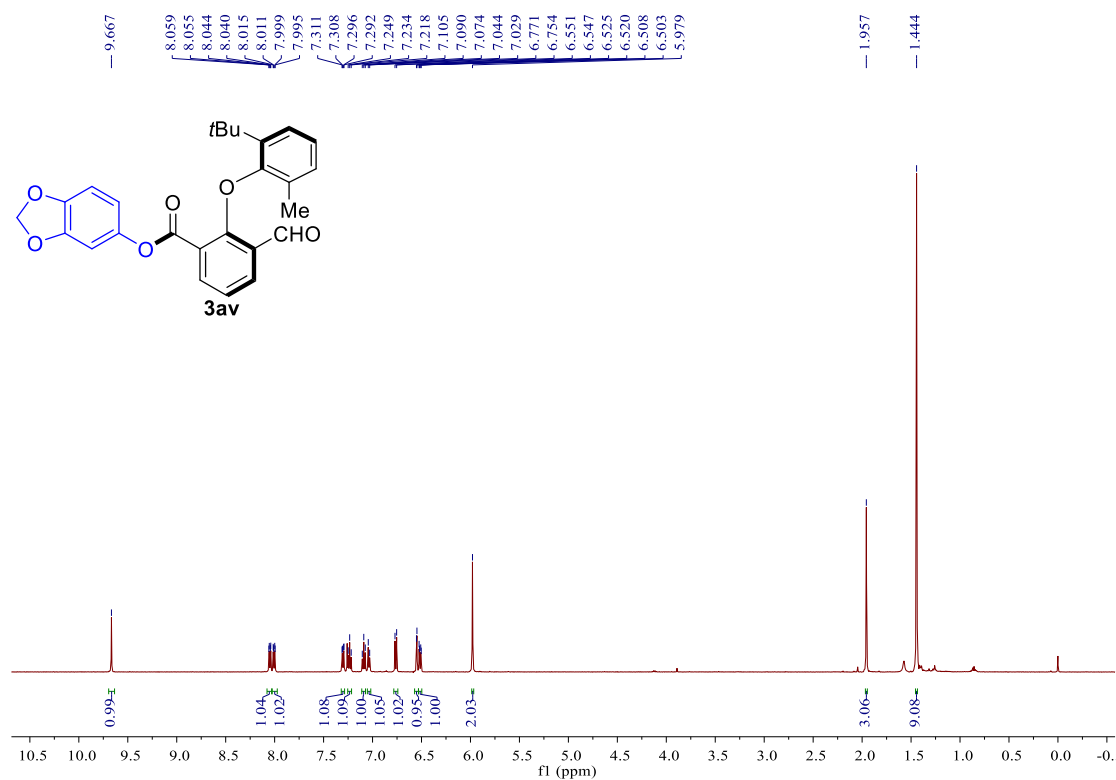

**<sup>1</sup>H NMR (500 MHz, CDCl<sub>3</sub>) spectrum of 3av.**

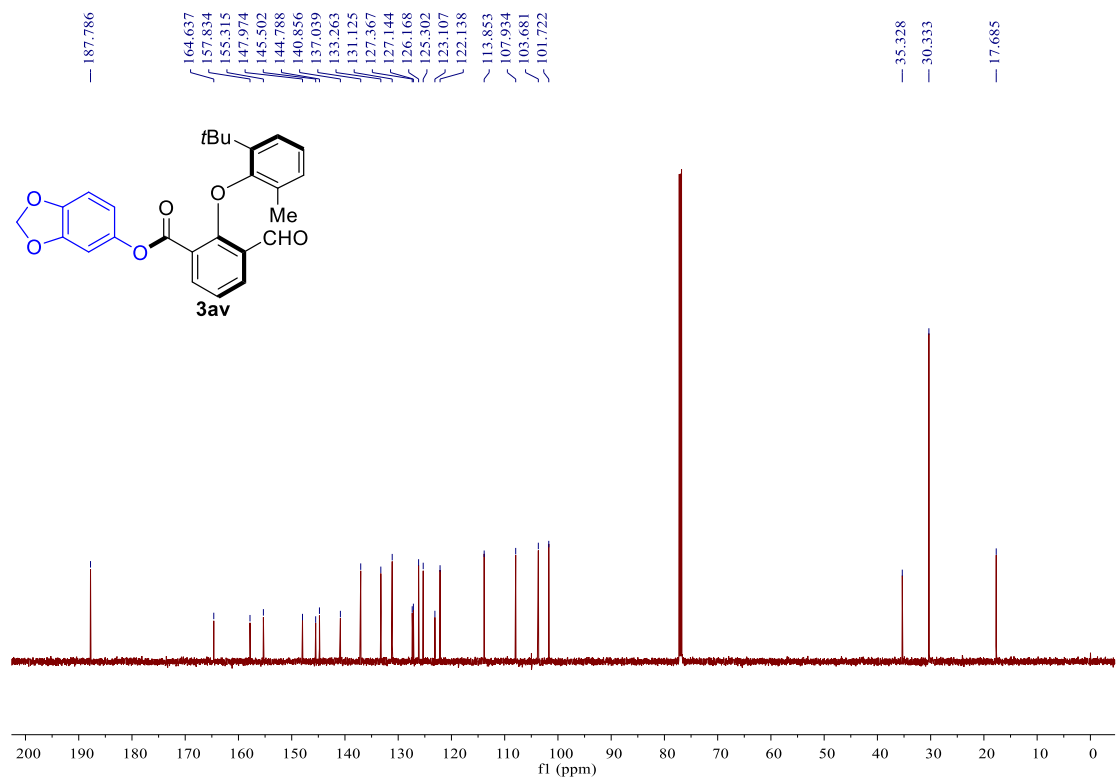

**<sup>13</sup>C NMR (150 MHz, CDCl<sub>3</sub>) spectrum of 3av.**

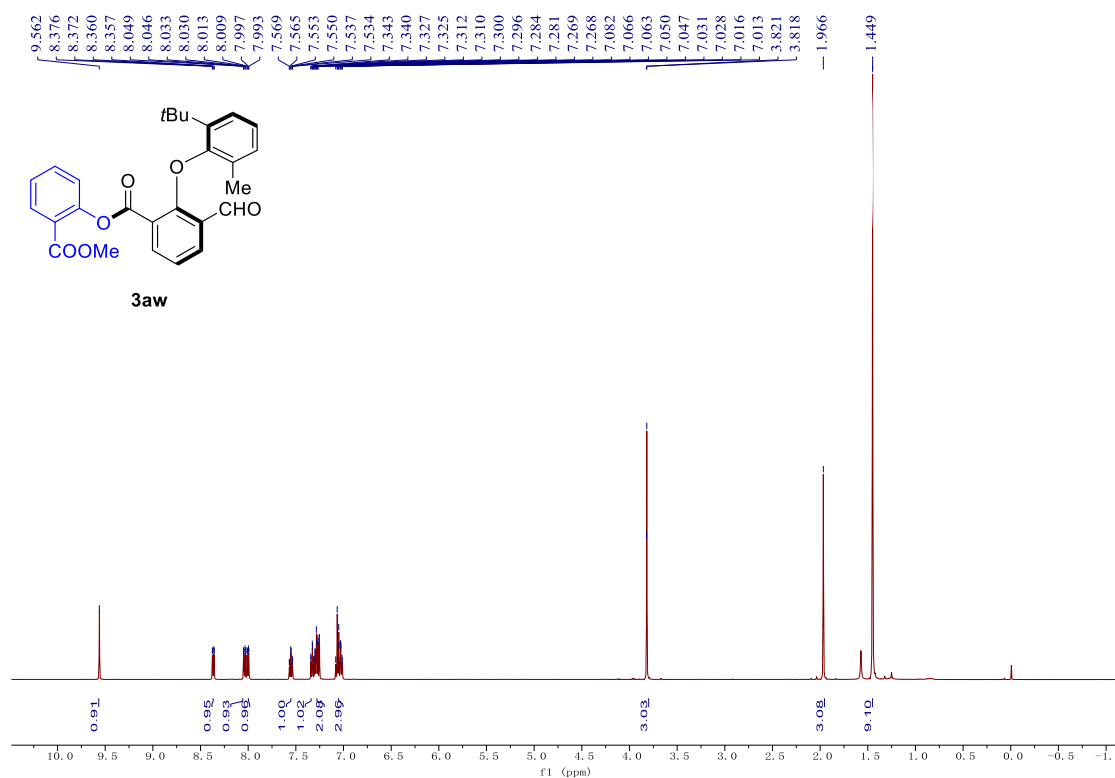

$^1\text{H}$  NMR (500 MHz,  $\text{CDCl}_3$ ) spectrum of **3aw**.

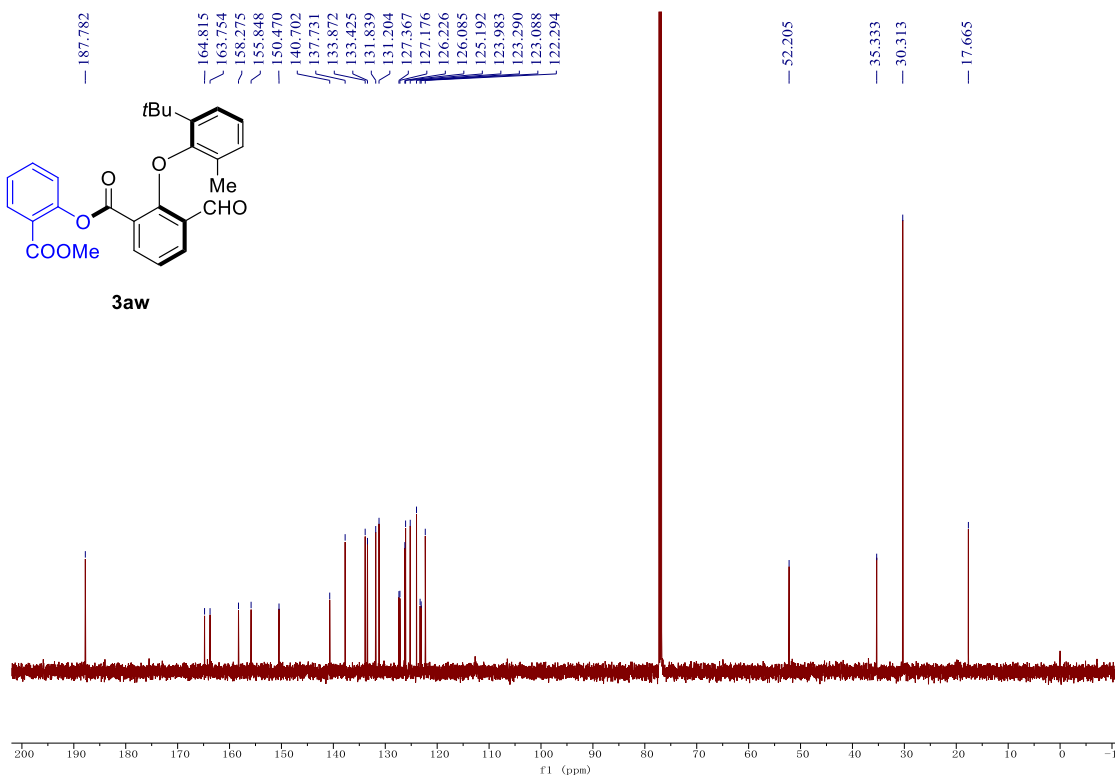

$^{13}\text{C}$  NMR (150 MHz,  $\text{CDCl}_3$ ) spectrum of **3aw**.

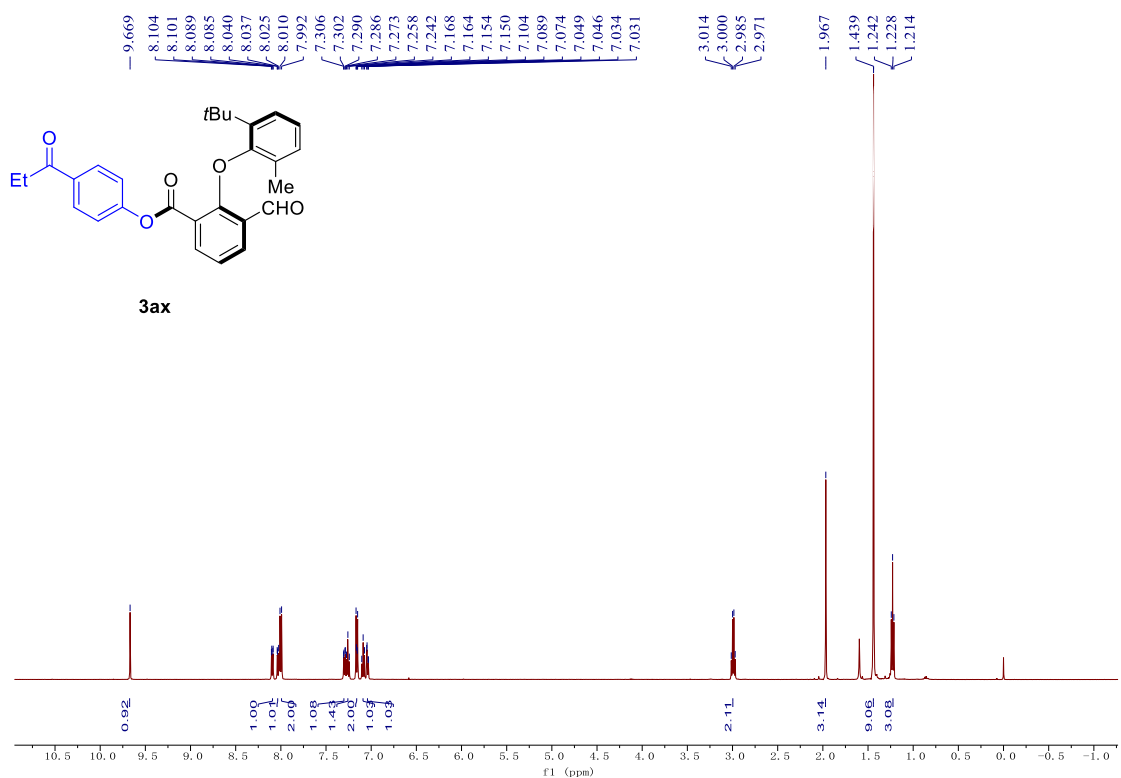

**<sup>1</sup>H NMR (500 MHz, CDCl<sub>3</sub>) spectrum of 3ax.**

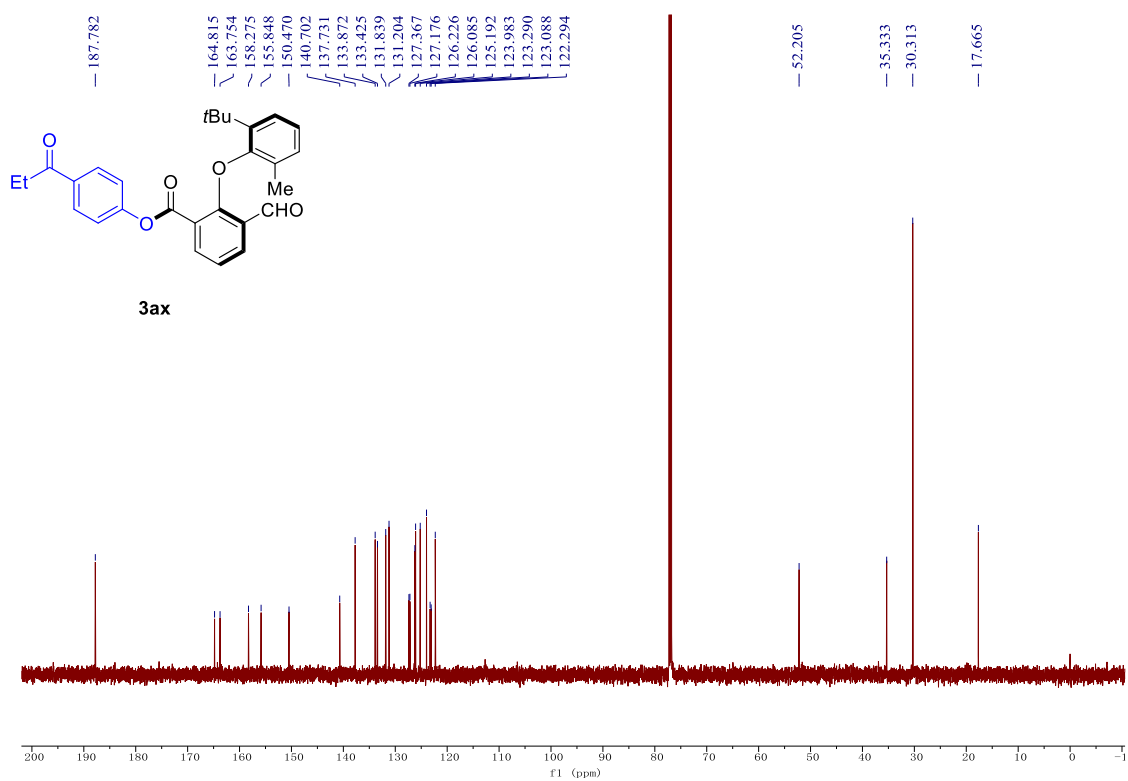

**<sup>13</sup>C NMR (125 MHz, CDCl<sub>3</sub>) spectrum of 3ax.**

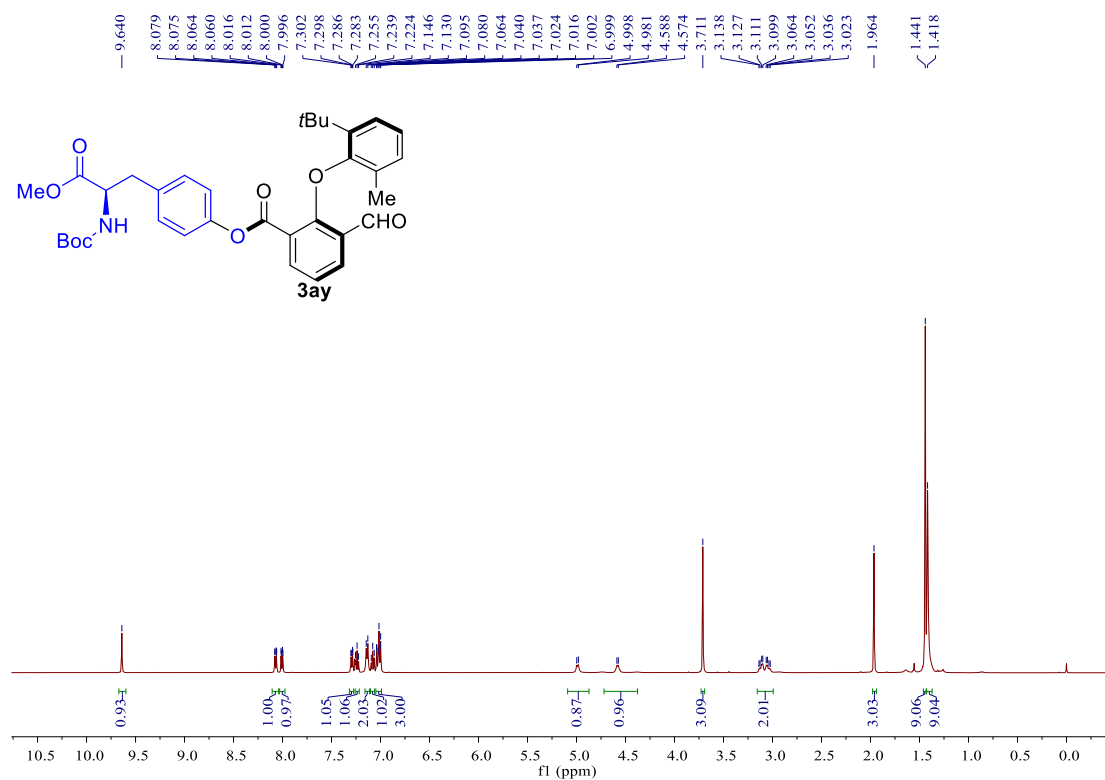

**<sup>1</sup>H NMR (500 MHz, CDCl<sub>3</sub>) spectrum of 3ay.**

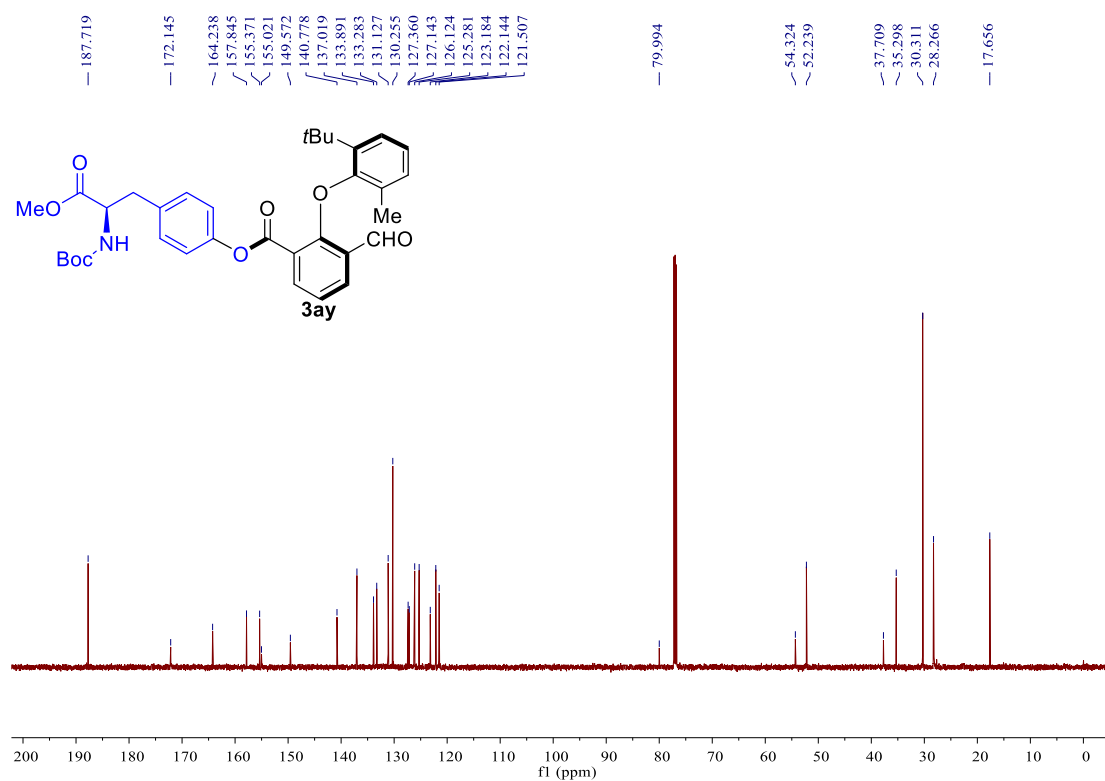

**<sup>13</sup>C NMR (150 MHz, CDCl<sub>3</sub>) spectrum of 3ay.**

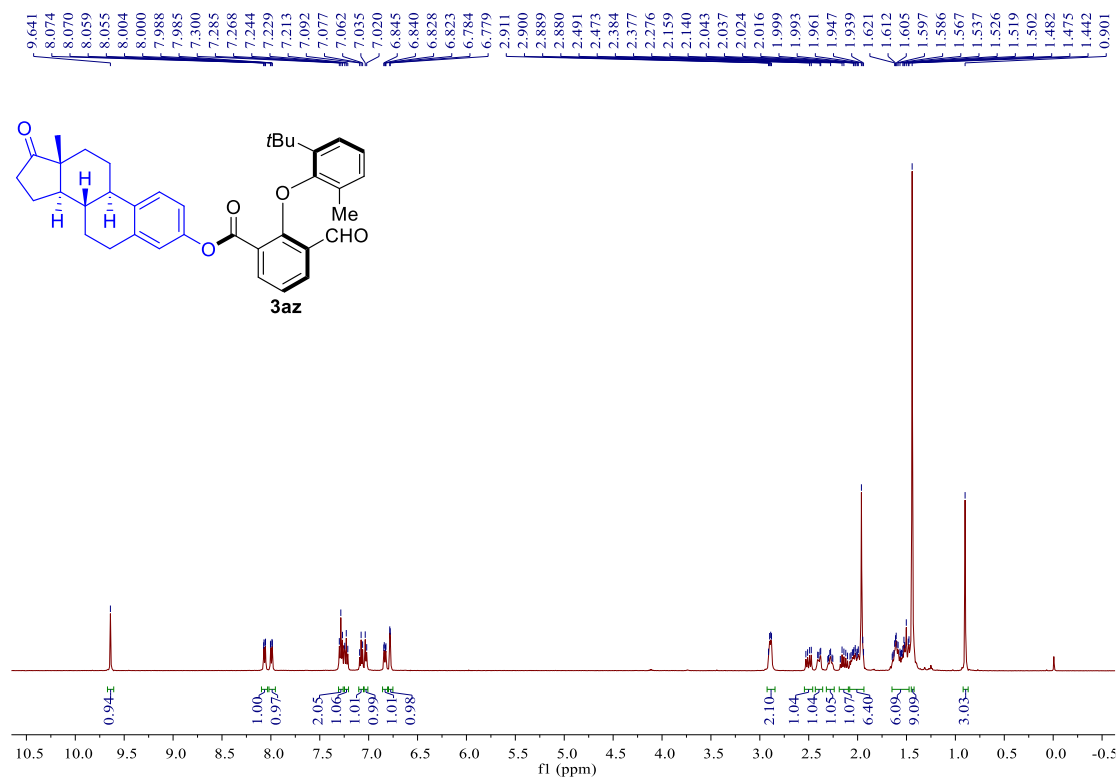

**<sup>1</sup>H NMR (500 MHz, CDCl<sub>3</sub>) spectrum of 3az.**

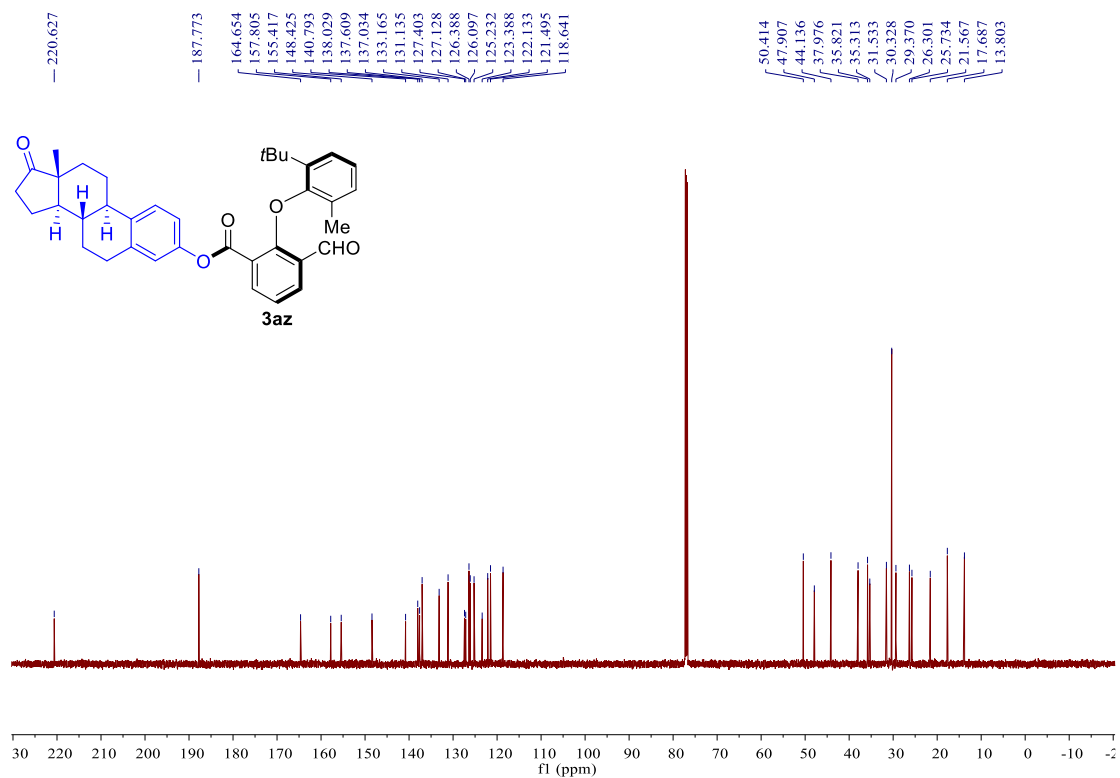

**<sup>13</sup>C NMR (150 MHz, CDCl<sub>3</sub>) spectrum of 3az.**

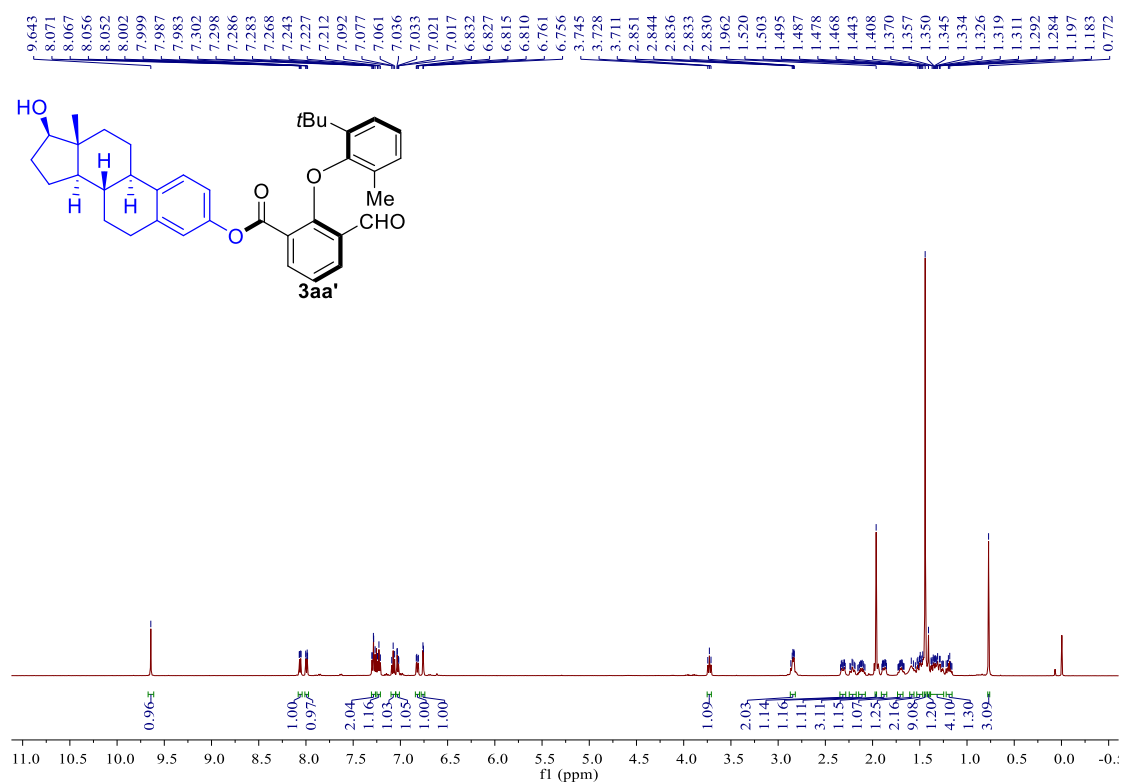

**$^1\text{H}$  NMR (500 MHz,  $\text{CDCl}_3$ ) spectrum of **3aa'**.**

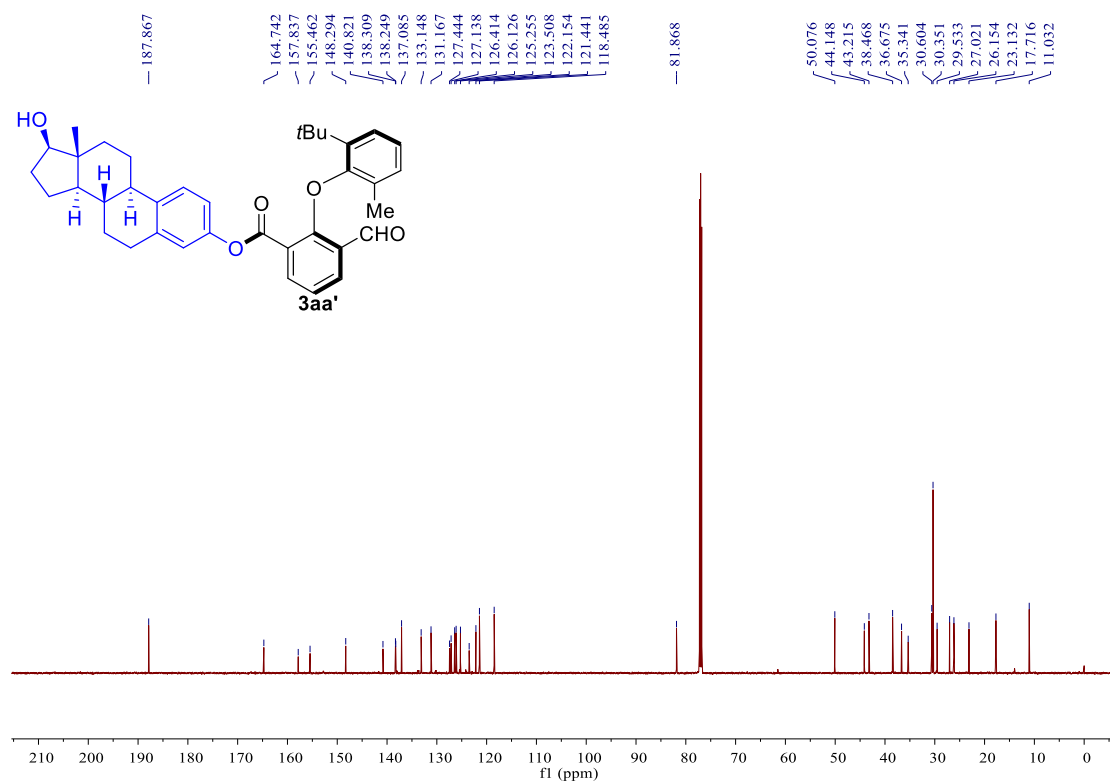

**$^{13}\text{C}$  NMR (150 MHz,  $\text{CDCl}_3$ ) spectrum of **3aa'**.**

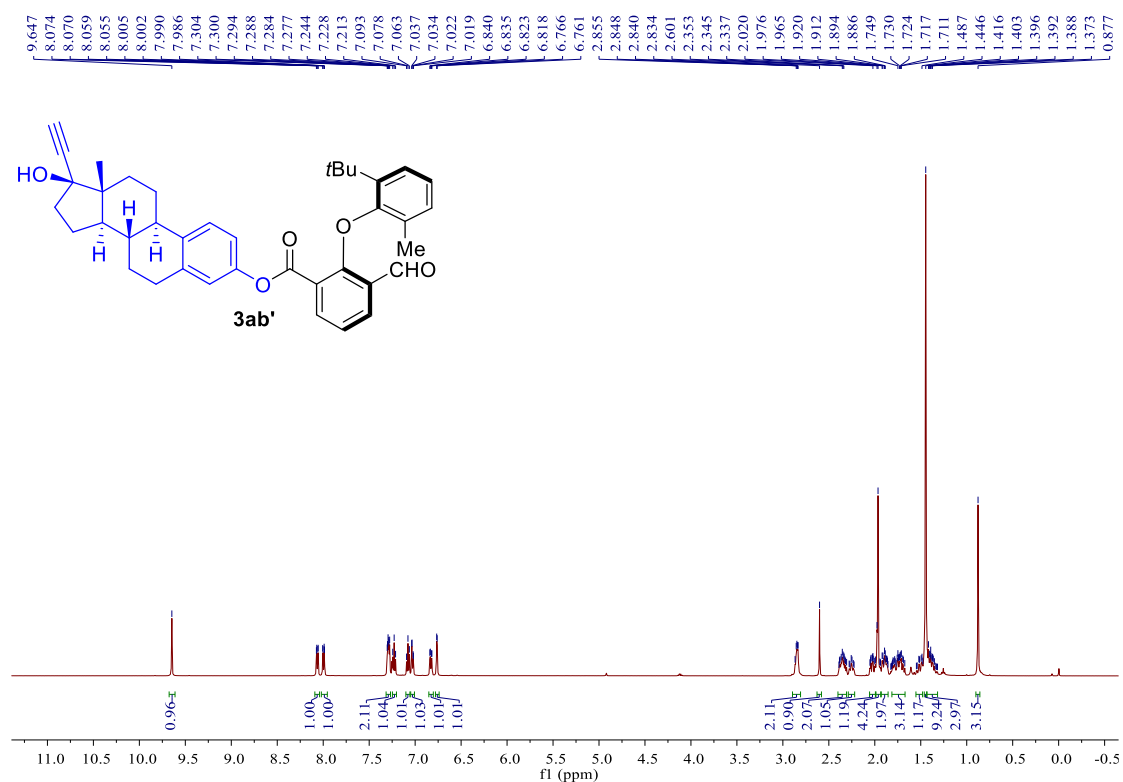

**<sup>1</sup>H NMR (500 MHz, CDCl<sub>3</sub>) spectrum of 3ab'.**

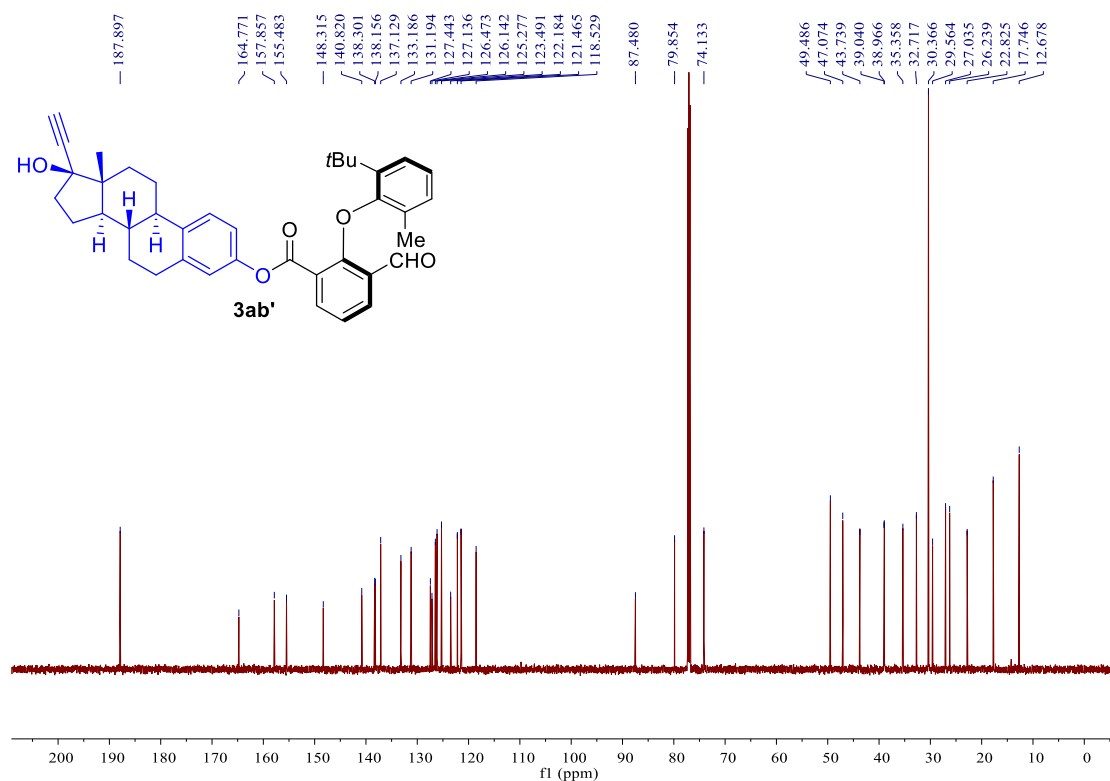

**<sup>13</sup>C NMR (150 MHz, CDCl<sub>3</sub>) spectrum of 3ab'.**

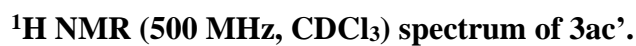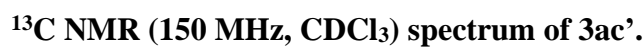

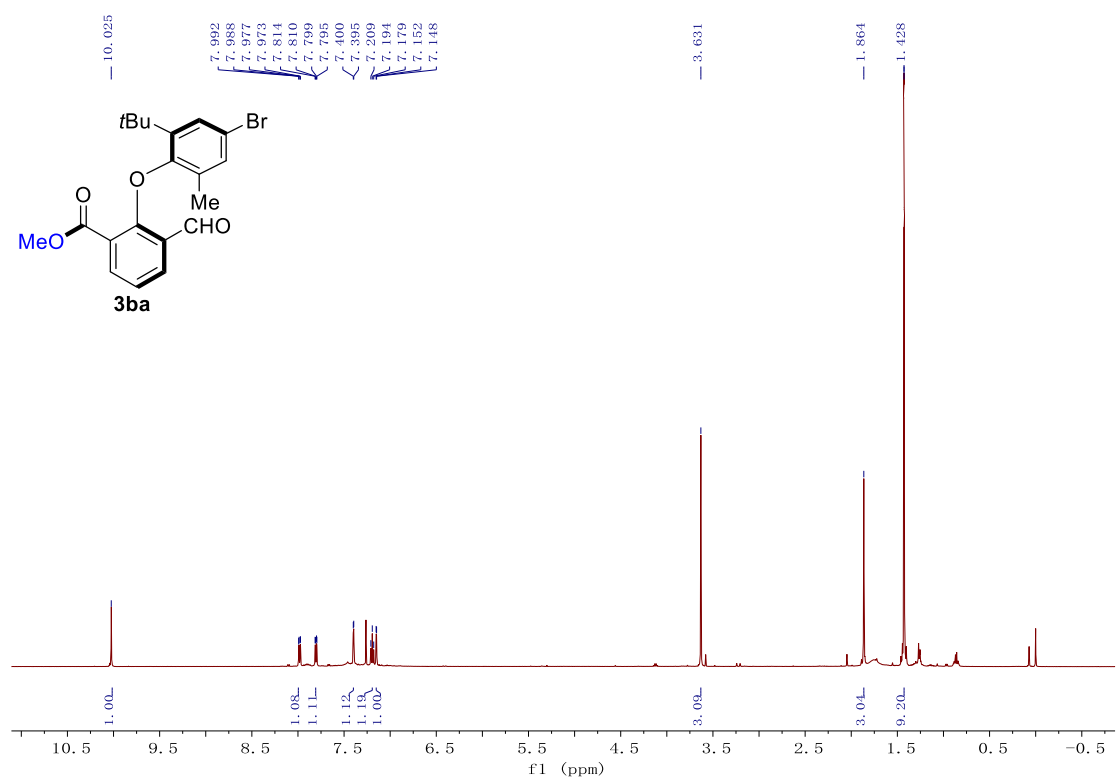

**<sup>1</sup>H NMR (500 MHz, CDCl<sub>3</sub>) spectrum of 3ba.**

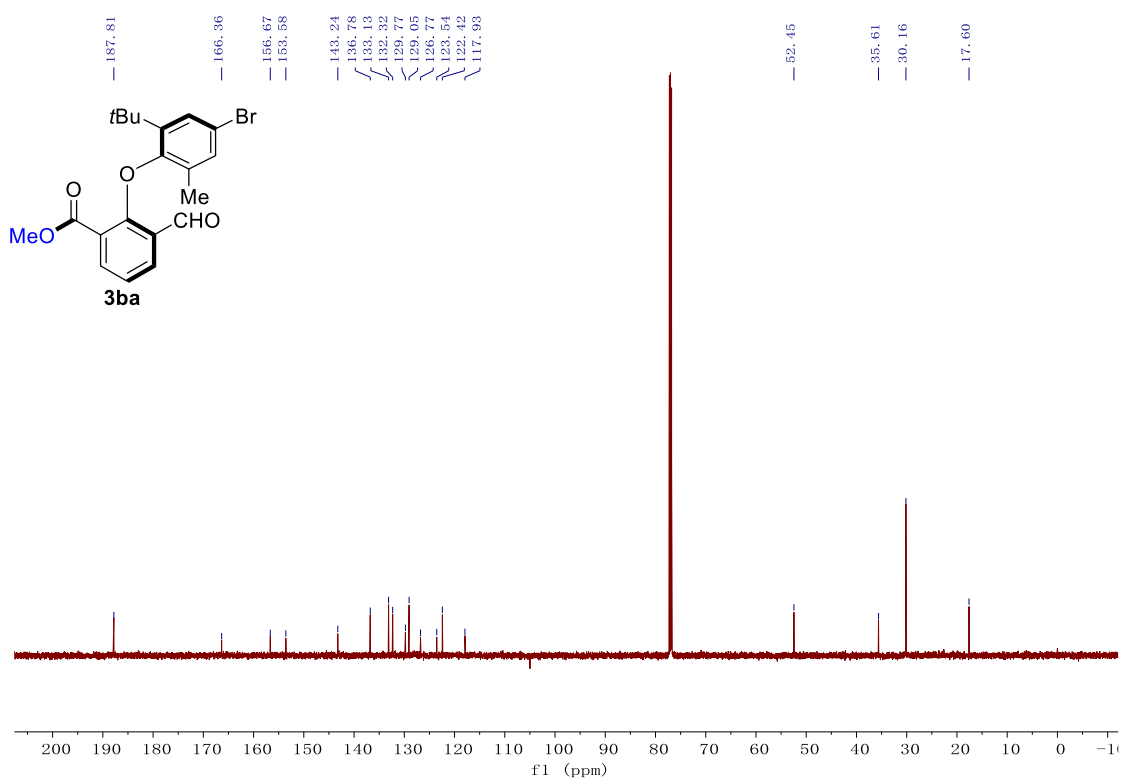

**<sup>13</sup>C NMR (150 MHz, CDCl<sub>3</sub>) spectrum of 3ba.**

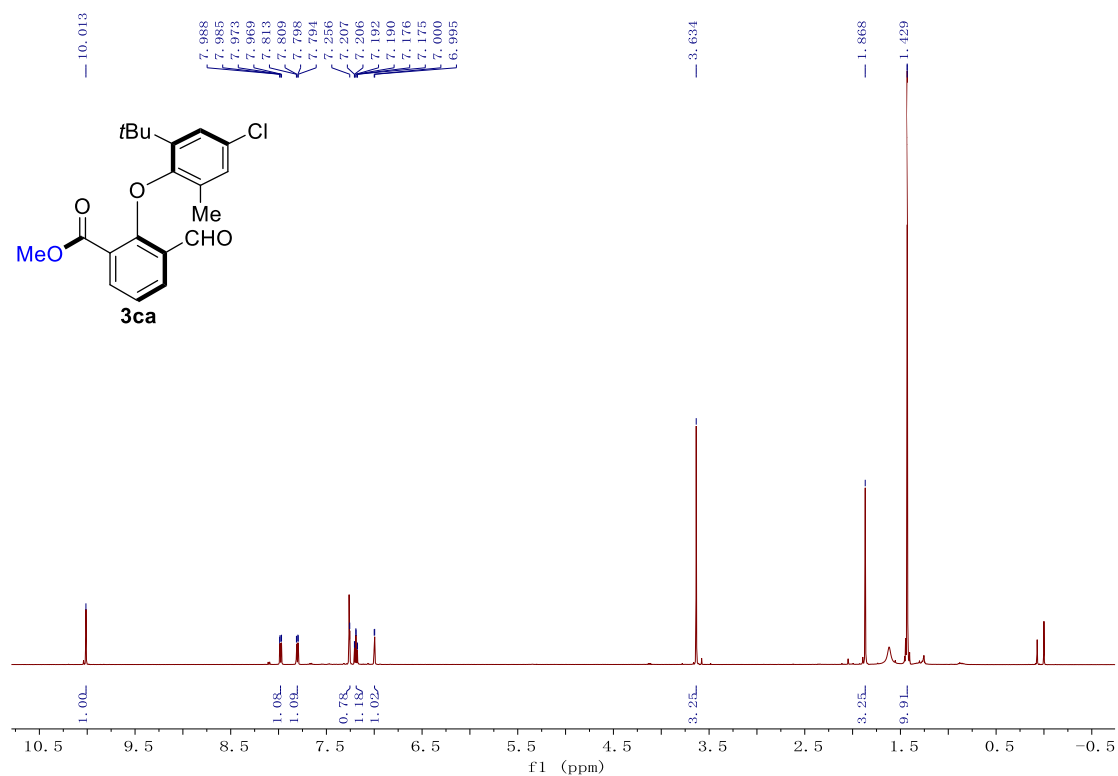

**<sup>1</sup>H NMR (500 MHz, CDCl<sub>3</sub>) spectrum of 3ca.**

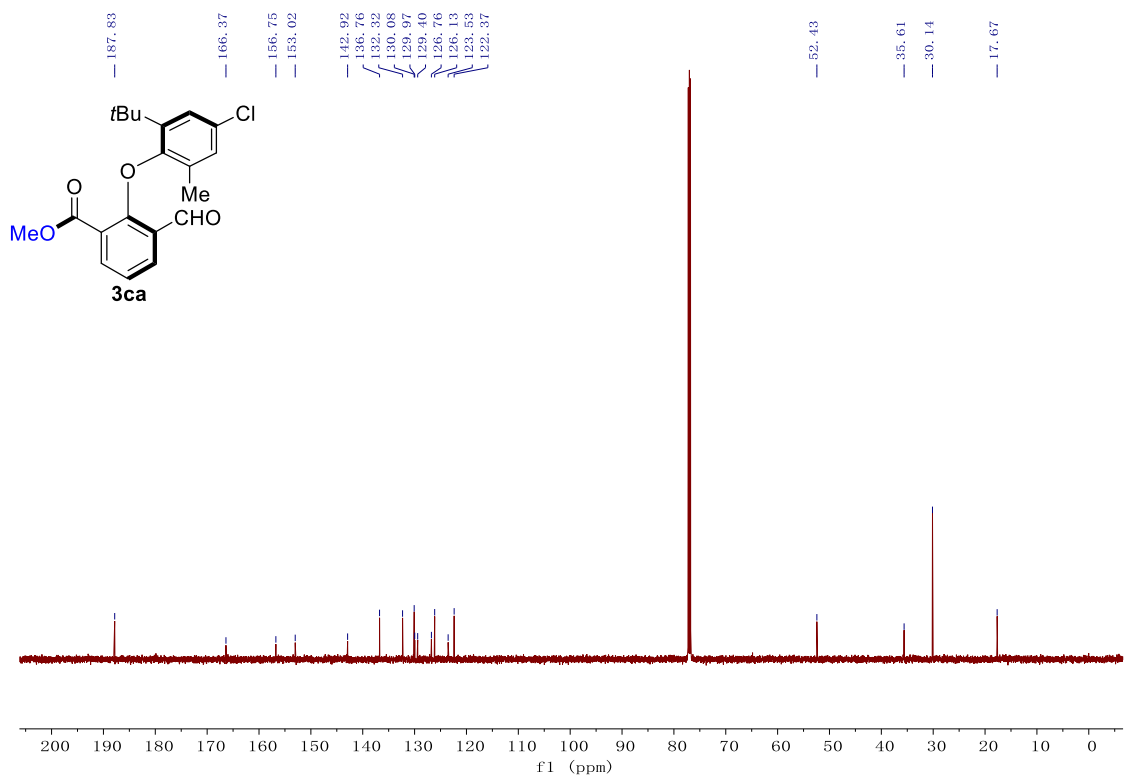

**<sup>13</sup>C NMR (150 MHz, CDCl<sub>3</sub>) spectrum of 3ca.**

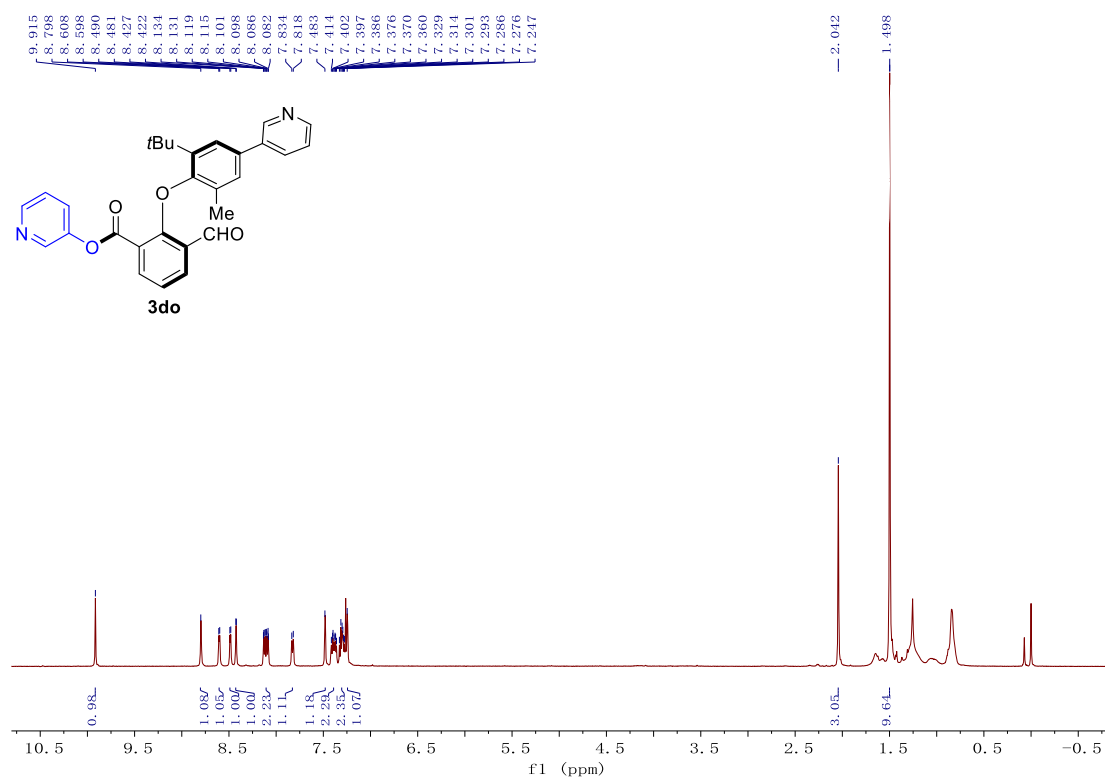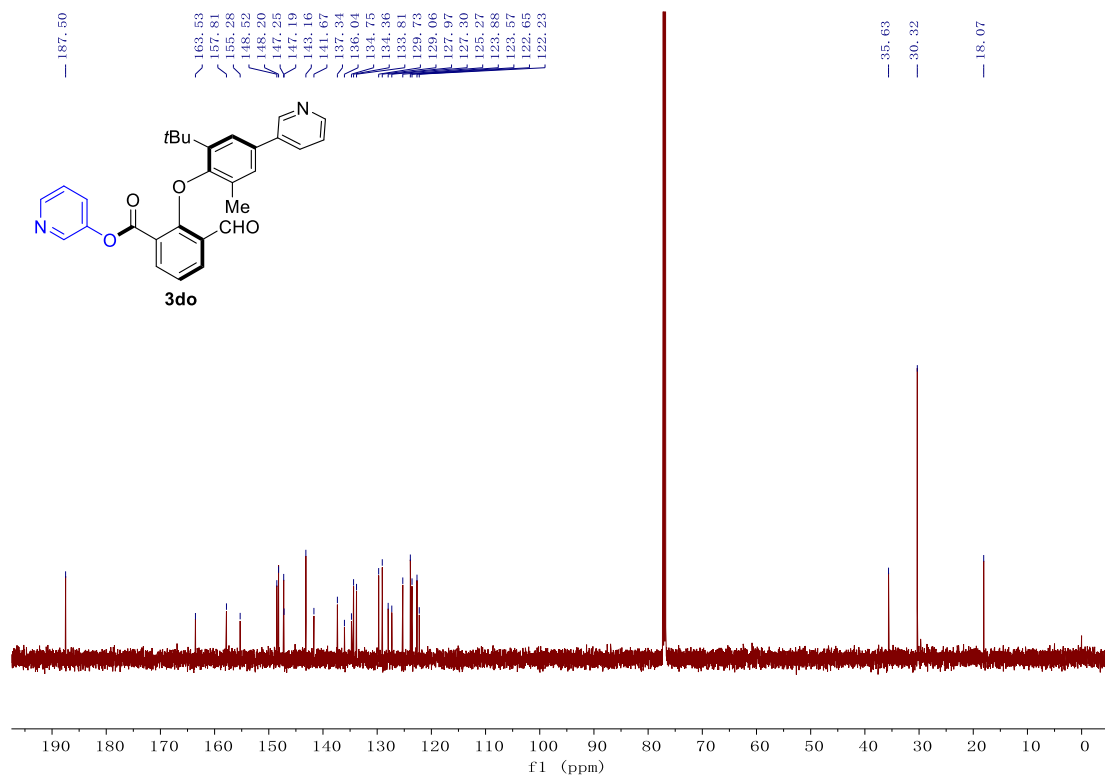

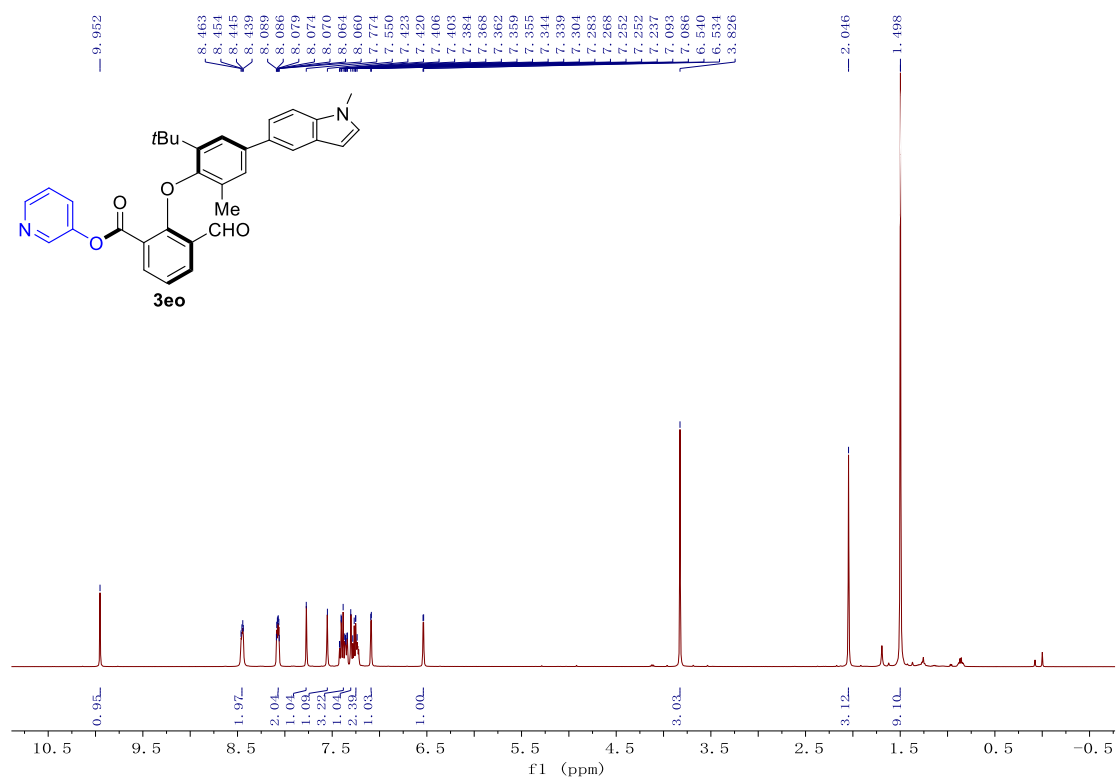

**<sup>1</sup>H NMR (500 MHz, CDCl<sub>3</sub>) spectrum of 3eo.**

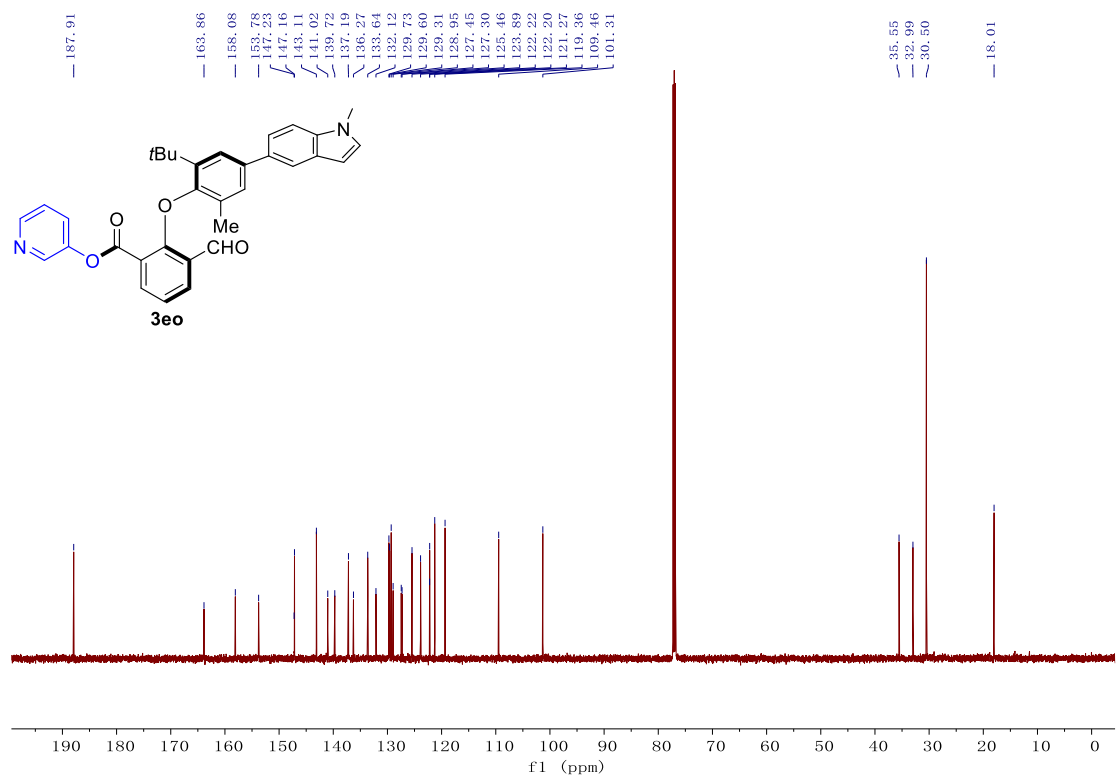

**<sup>13</sup>C NMR (150 MHz, CDCl<sub>3</sub>) spectrum of 3eo.**

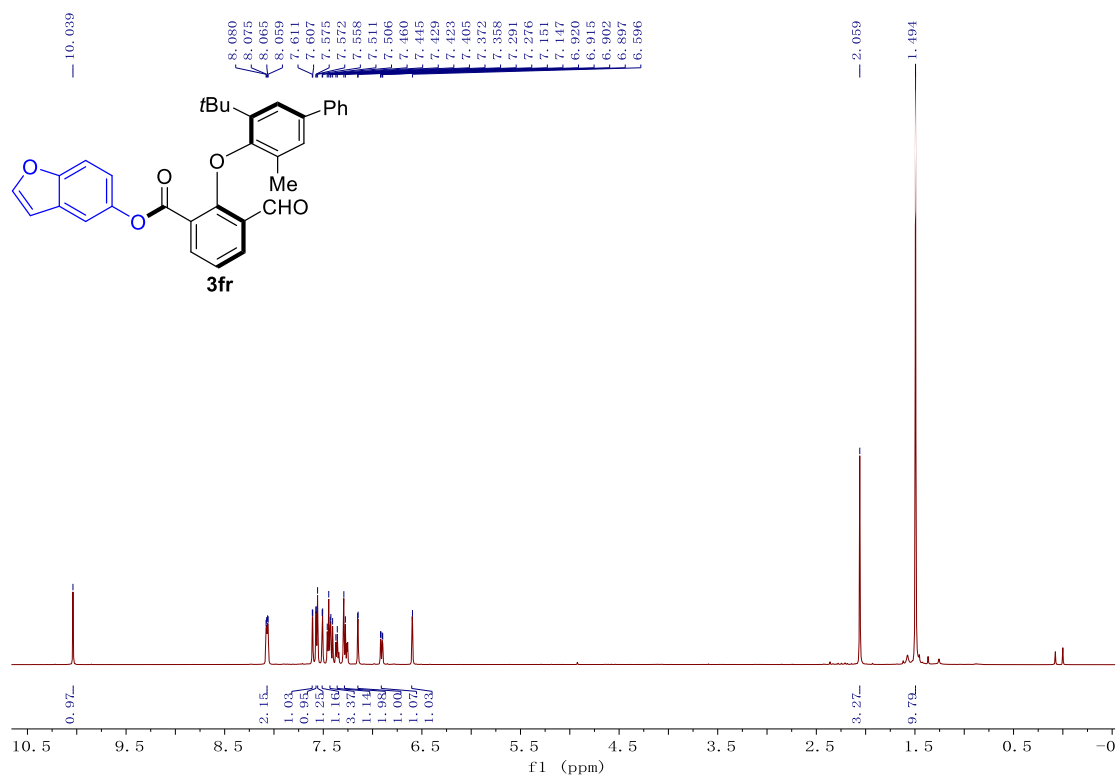

**<sup>1</sup>H NMR (500 MHz, CDCl<sub>3</sub>) spectrum of 3fr.**

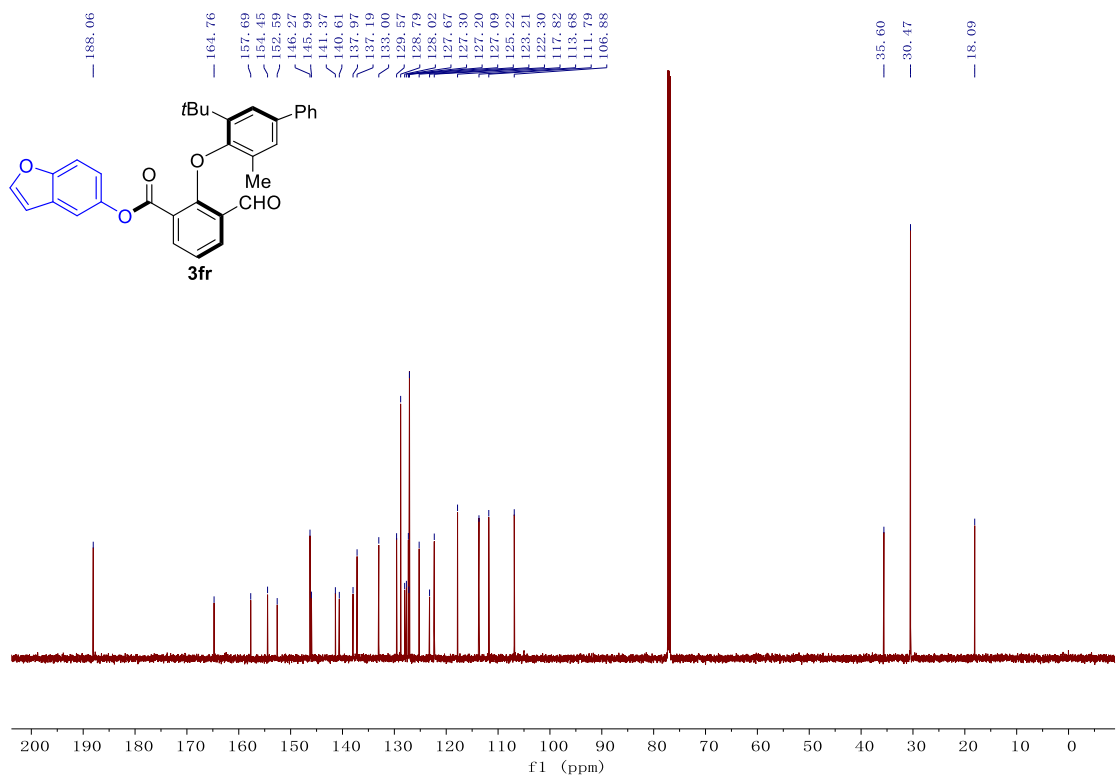

**<sup>13</sup>C NMR (150 MHz, CDCl<sub>3</sub>) spectrum of 3fr.**

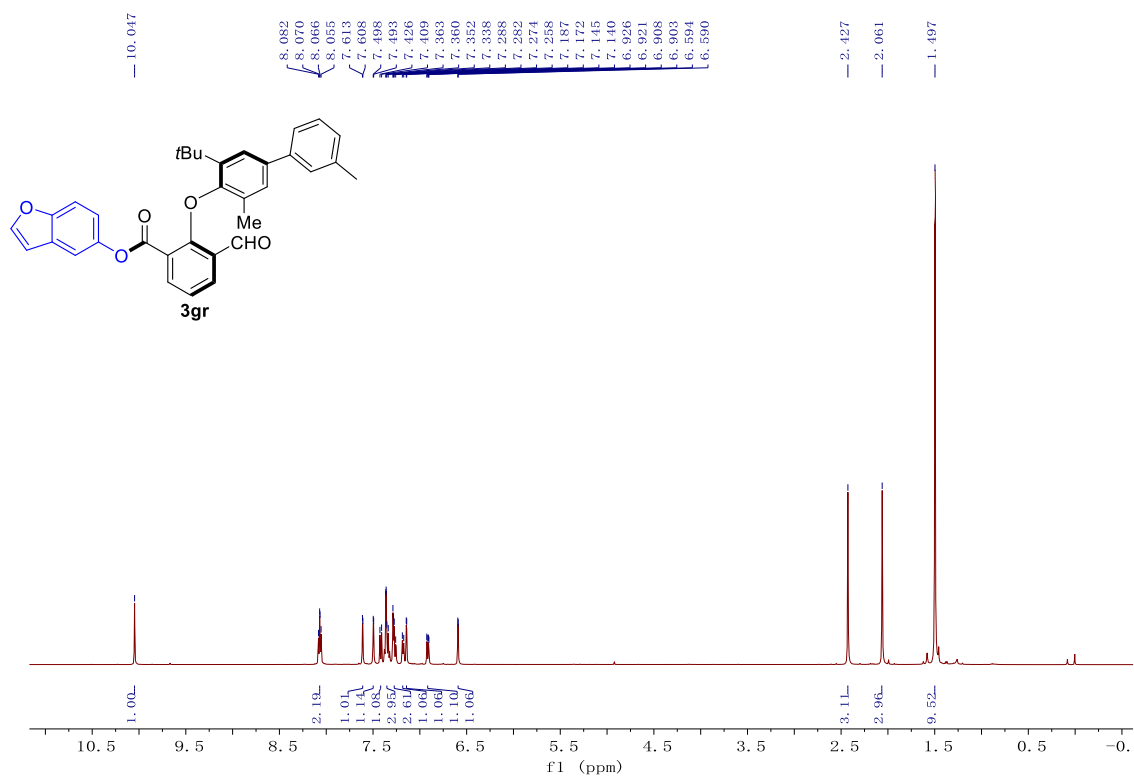

**<sup>1</sup>H NMR (500 MHz, CDCl<sub>3</sub>) spectrum of **3gr**.**

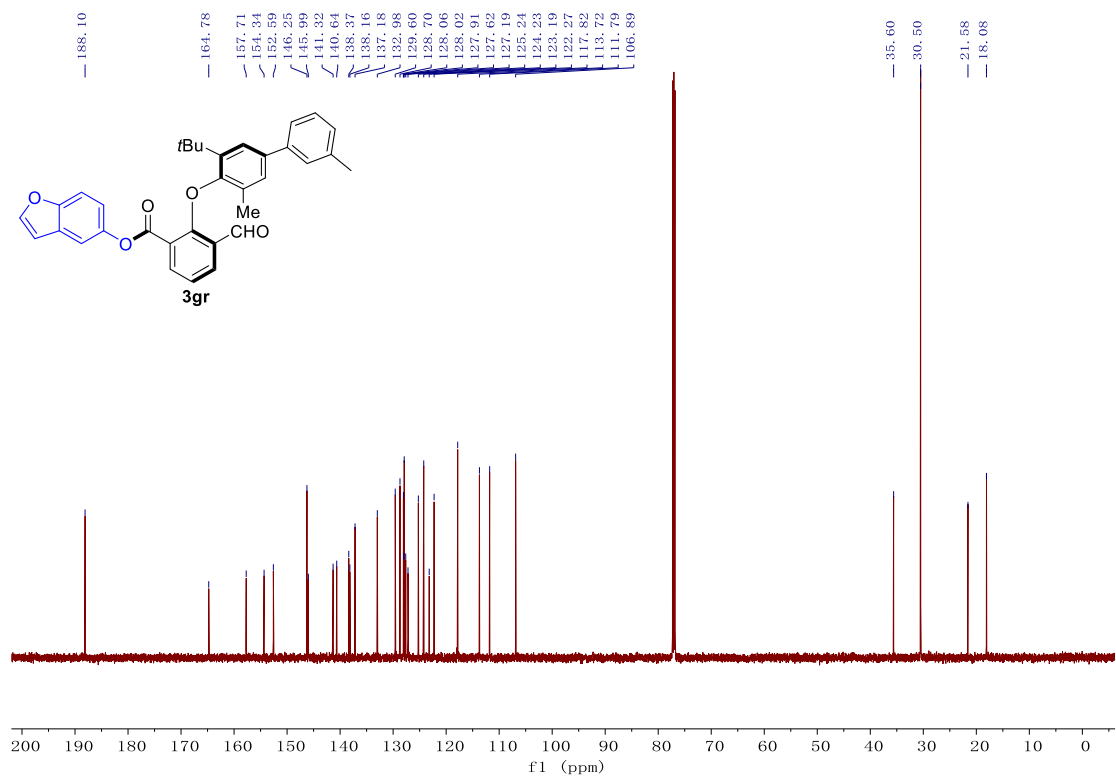

**<sup>13</sup>C NMR (150 MHz, CDCl<sub>3</sub>) spectrum of **3gr**.**

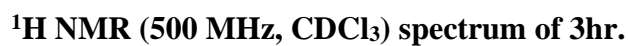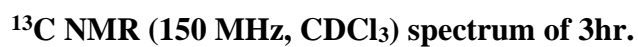

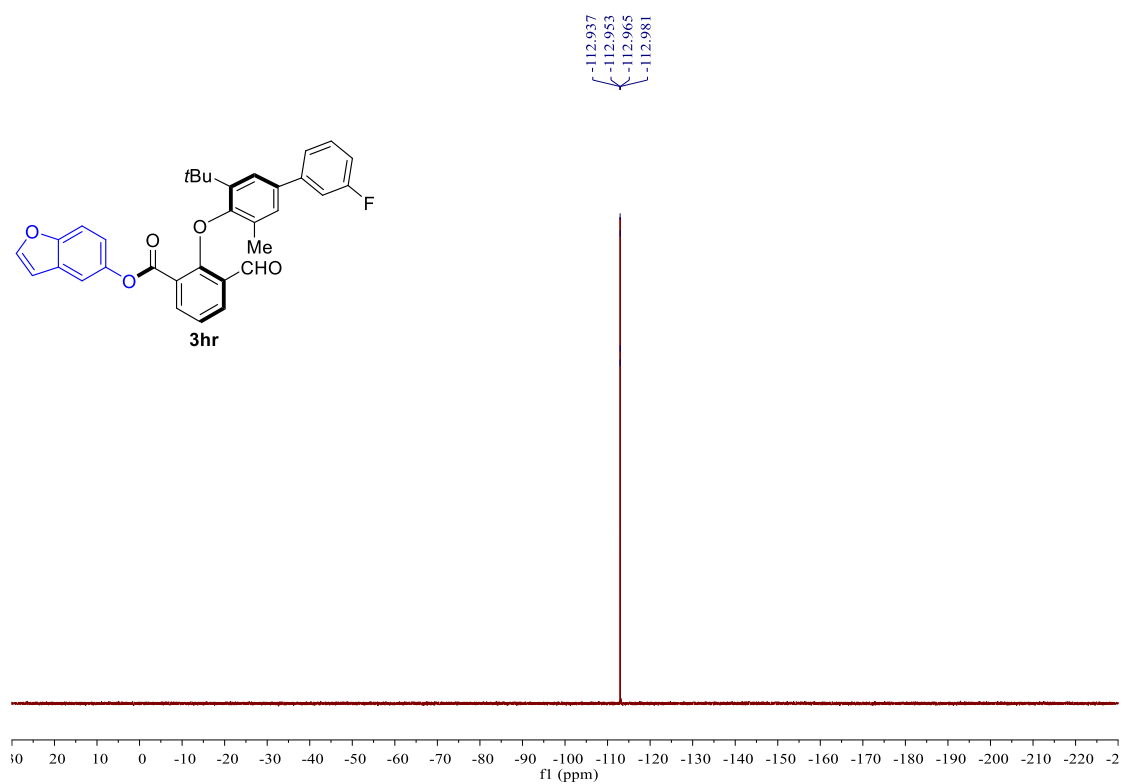

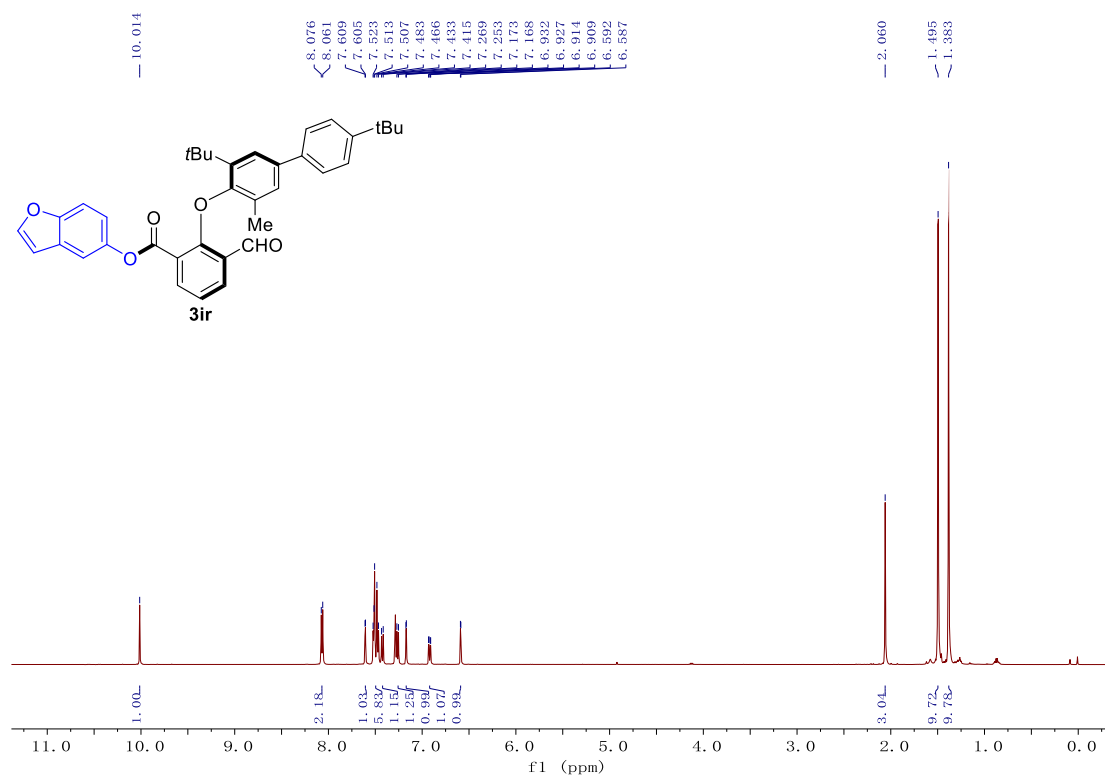

**<sup>1</sup>H NMR (500 MHz, CDCl<sub>3</sub>) spectrum of 3ir.**

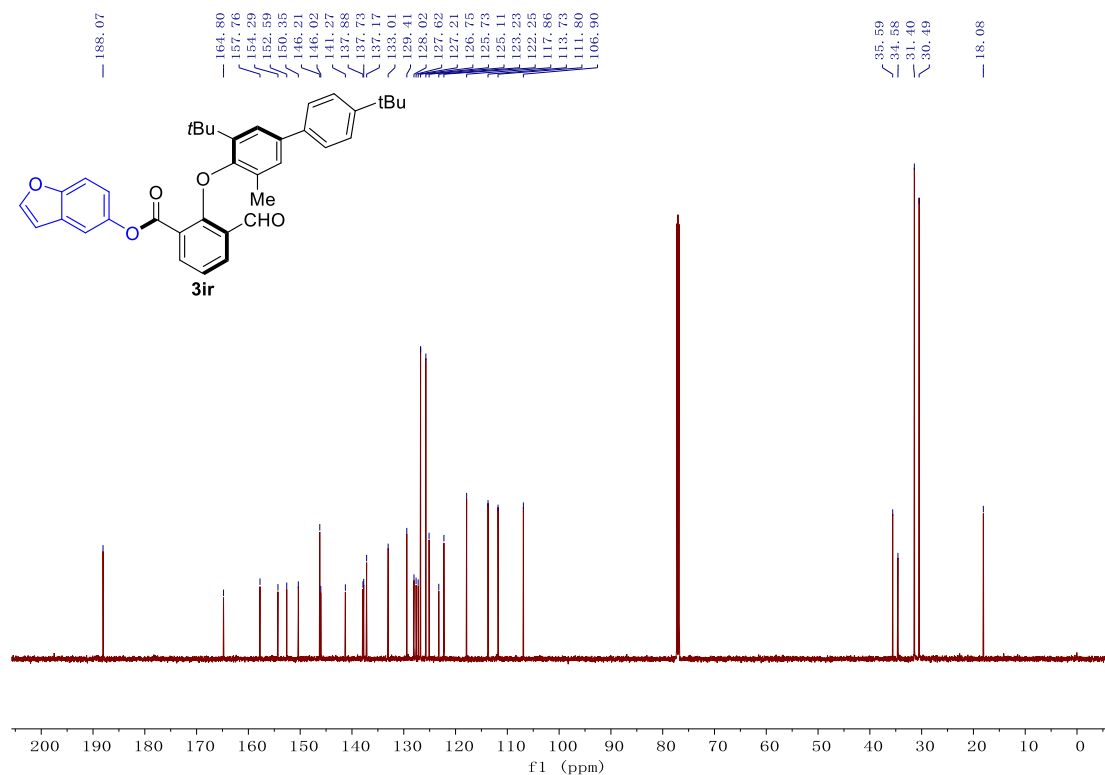

**<sup>13</sup>C NMR (150 MHz, CDCl<sub>3</sub>) spectrum of 3ir.**

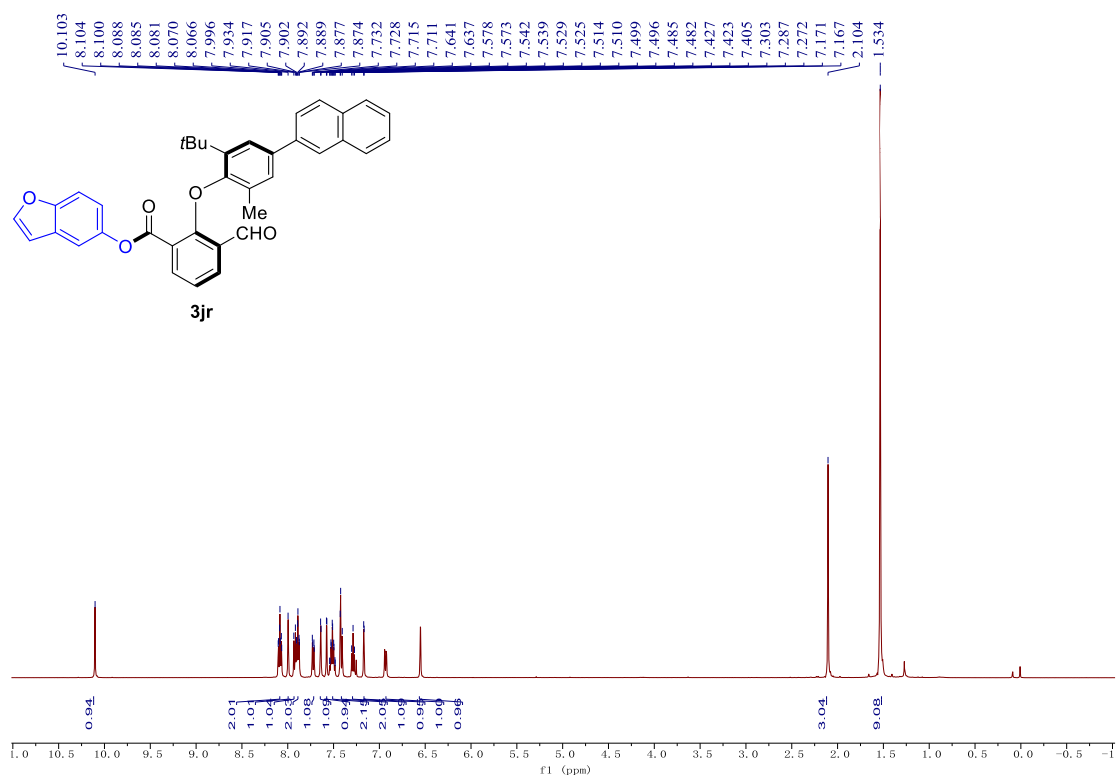

**<sup>1</sup>H NMR (500 MHz, CDCl<sub>3</sub>) spectrum of 3jr.**

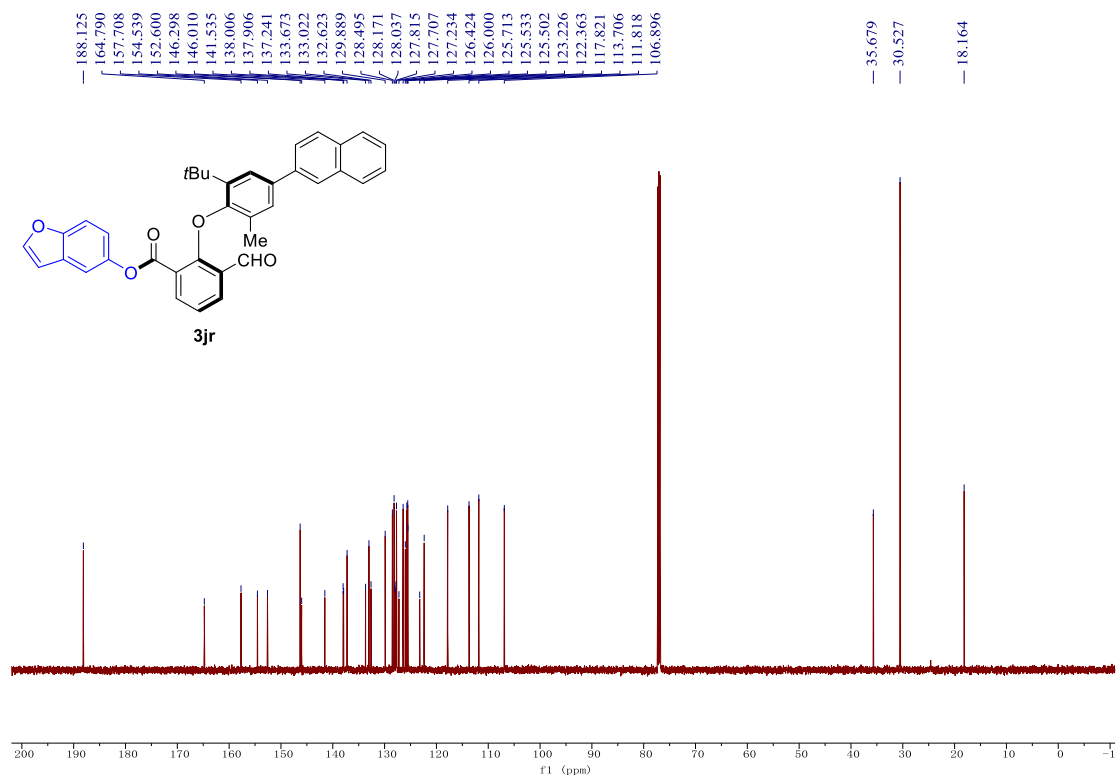

**<sup>13</sup>C NMR (125 MHz, CDCl<sub>3</sub>) spectrum of 3jr.**

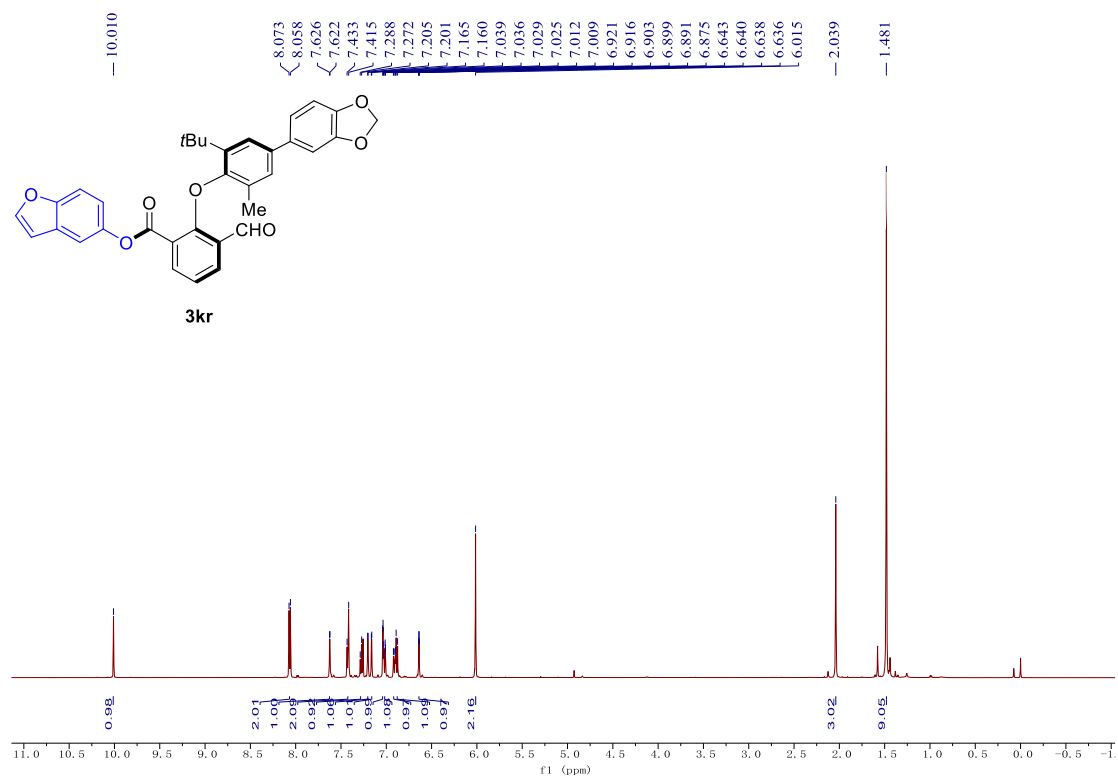

**<sup>1</sup>H NMR (500 MHz, CDCl<sub>3</sub>) spectrum of 3kr.**

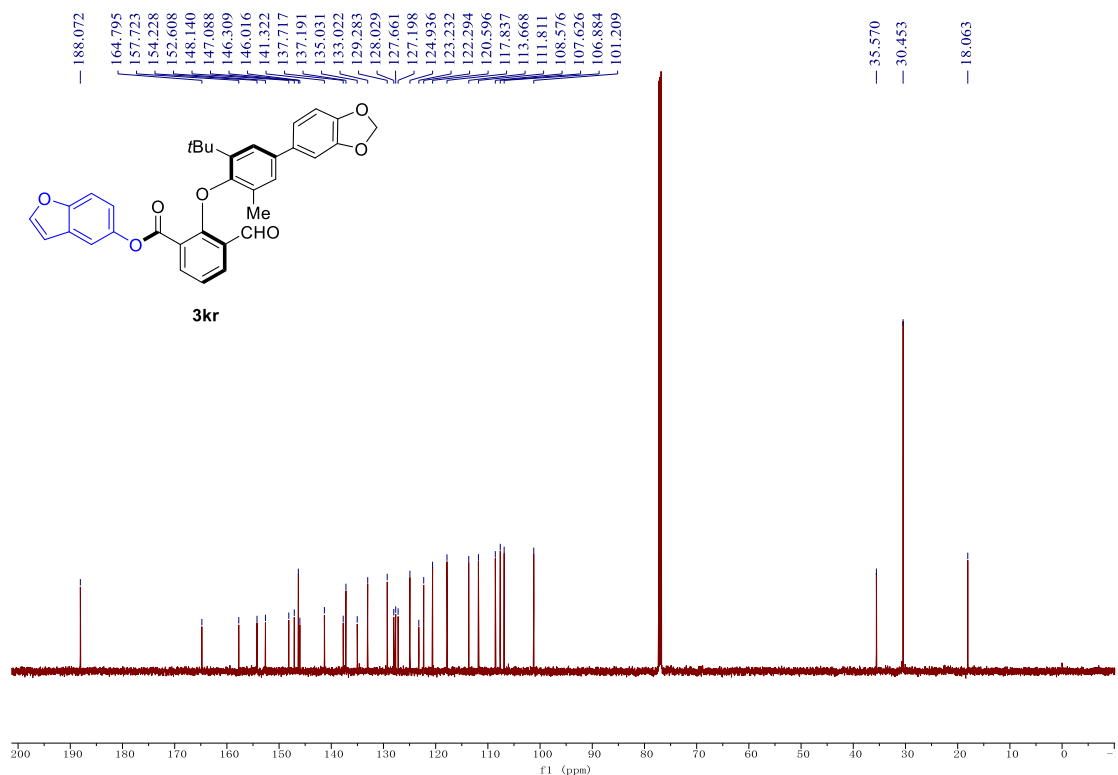

**<sup>13</sup>C NMR (125 MHz, CDCl<sub>3</sub>) spectrum of 3kr.**

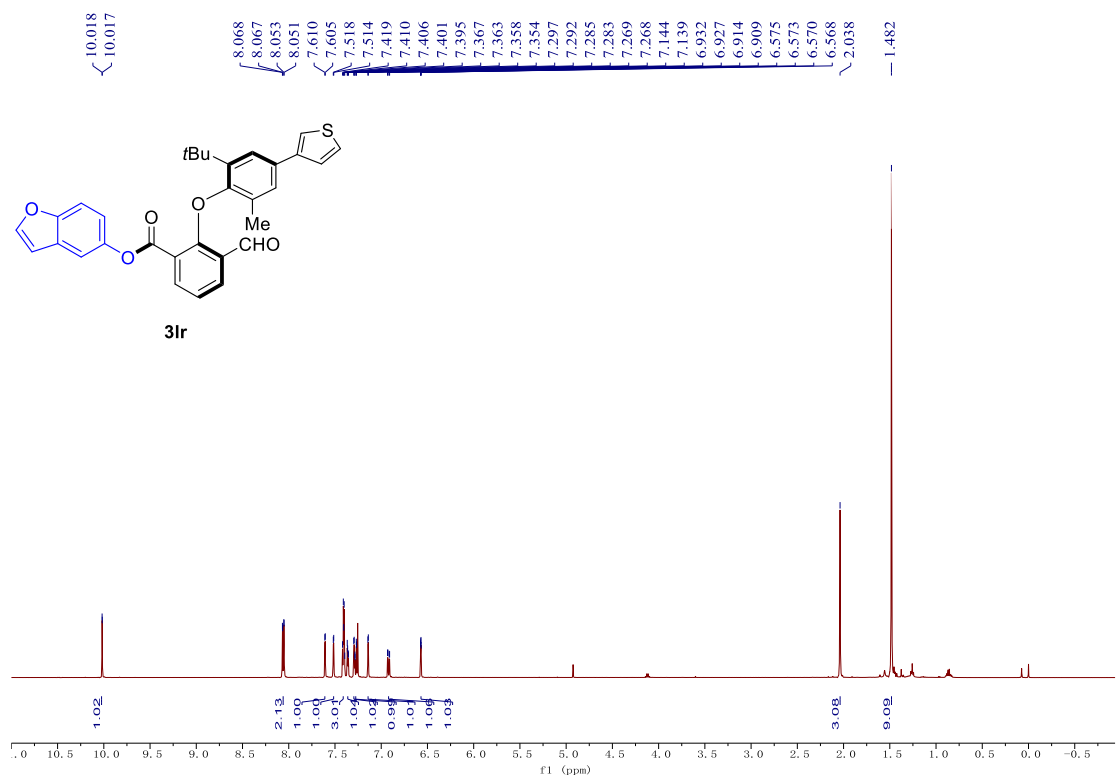

$^1\text{H}$  NMR (500 MHz,  $\text{CDCl}_3$ ) spectrum of **3lr**.

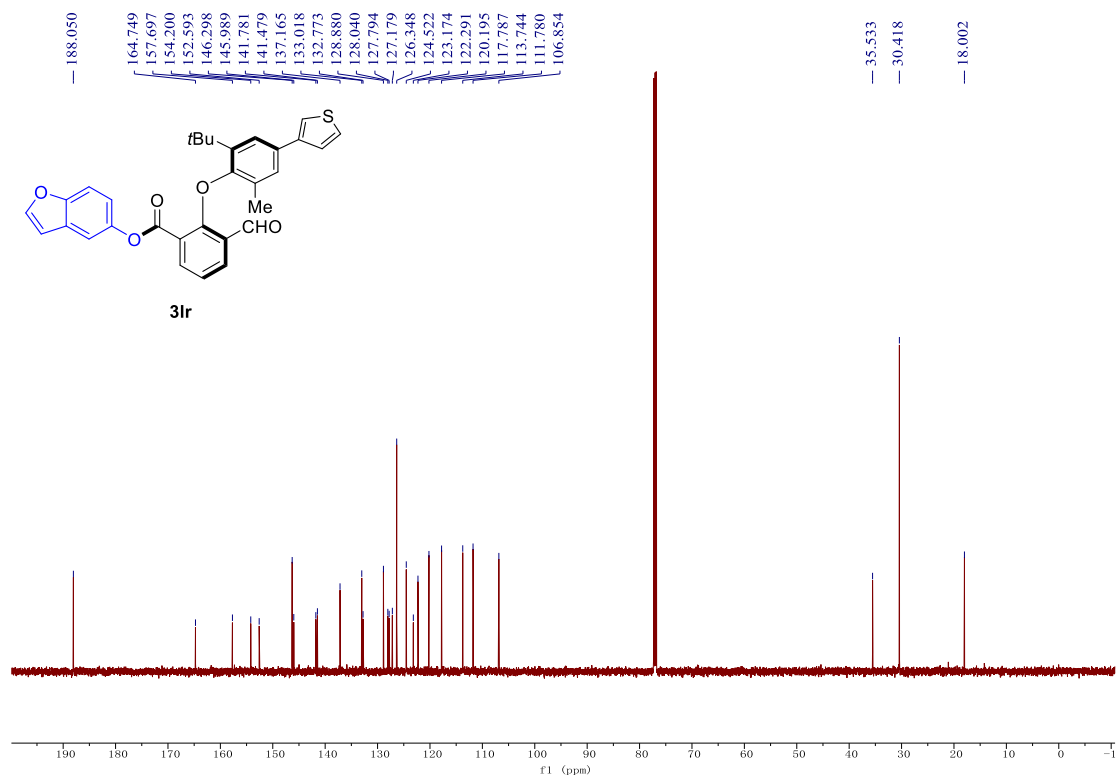

$^{13}\text{C}$  NMR (150 MHz,  $\text{CDCl}_3$ ) spectrum of **3lr**.

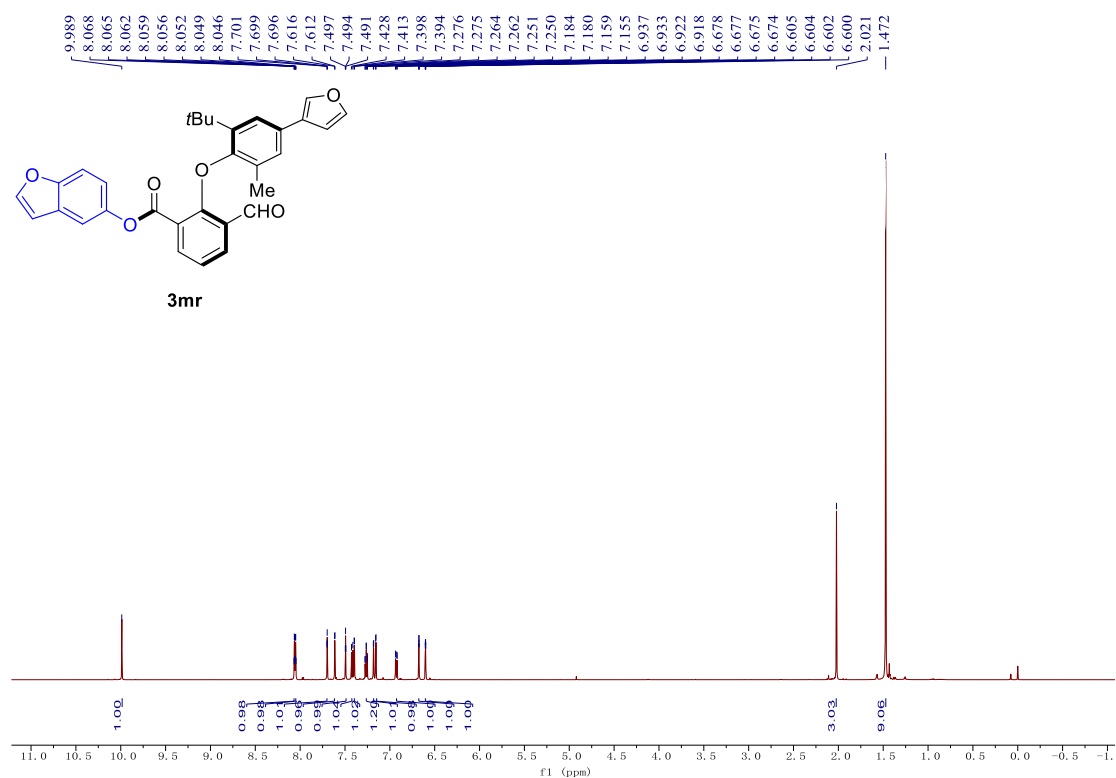

**<sup>1</sup>H NMR (500 MHz, CDCl<sub>3</sub>) spectrum of 3mr.**

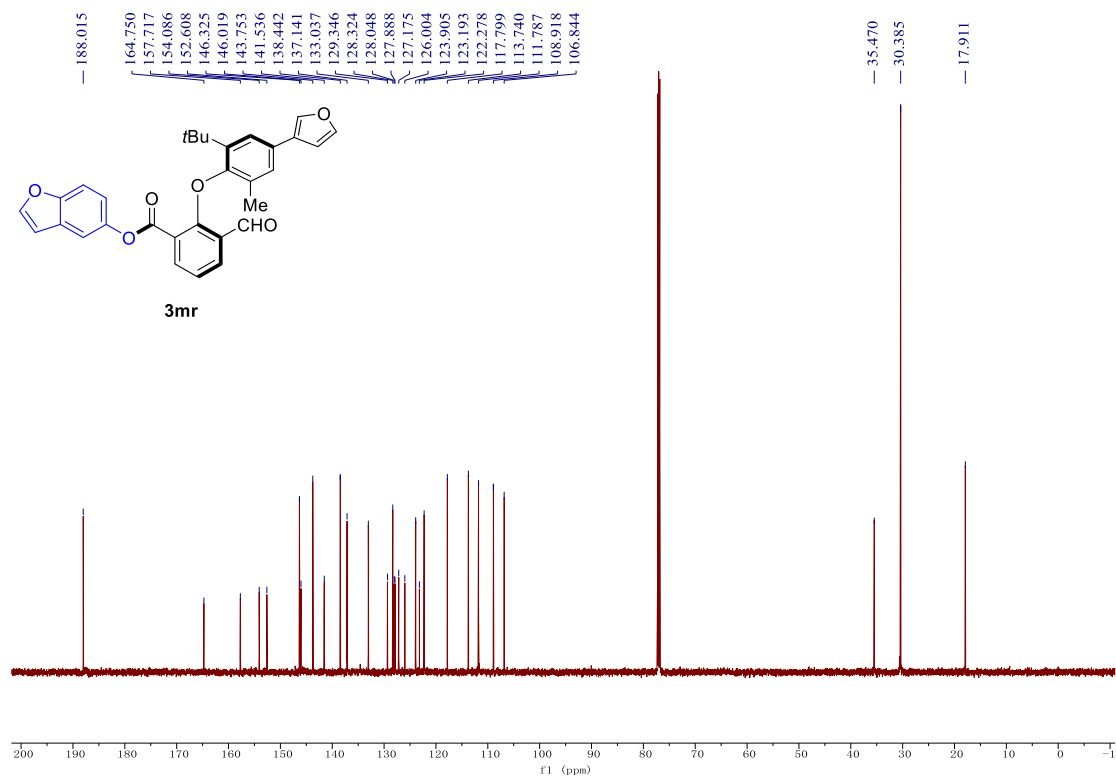

**<sup>13</sup>C NMR (150 MHz, CDCl<sub>3</sub>) spectrum of 3mr.**

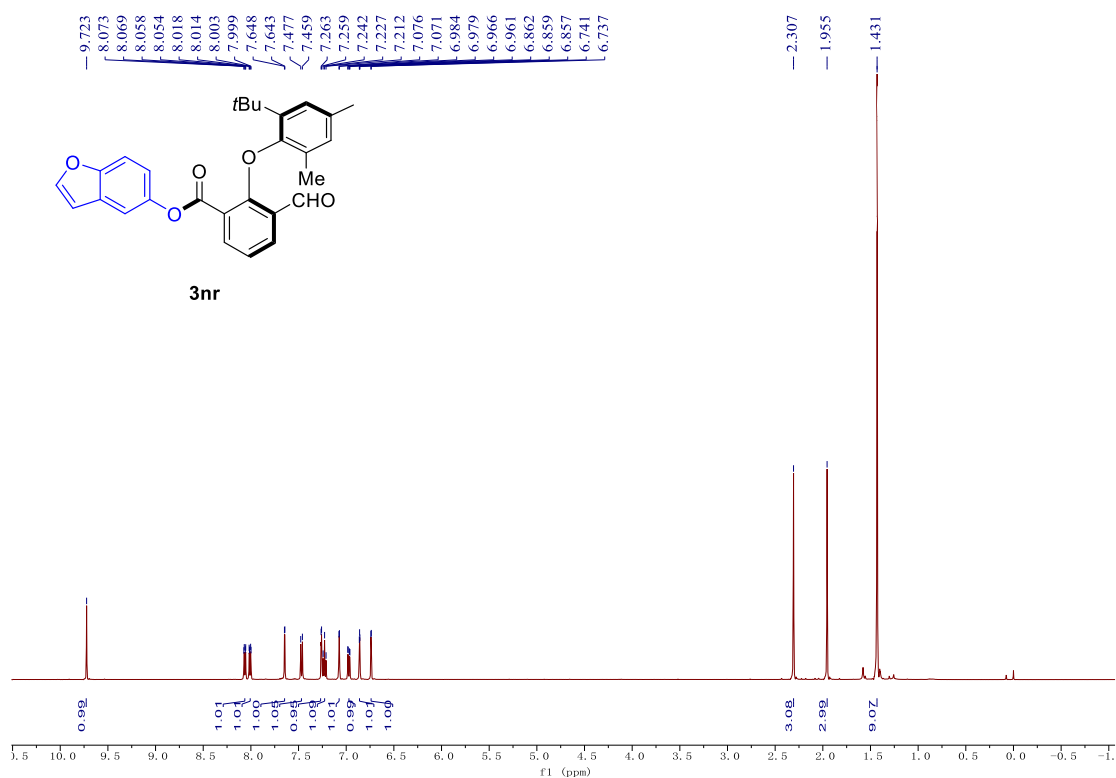

$^1\text{H}$  NMR (500 MHz,  $\text{CDCl}_3$ ) spectrum of **3nr**.

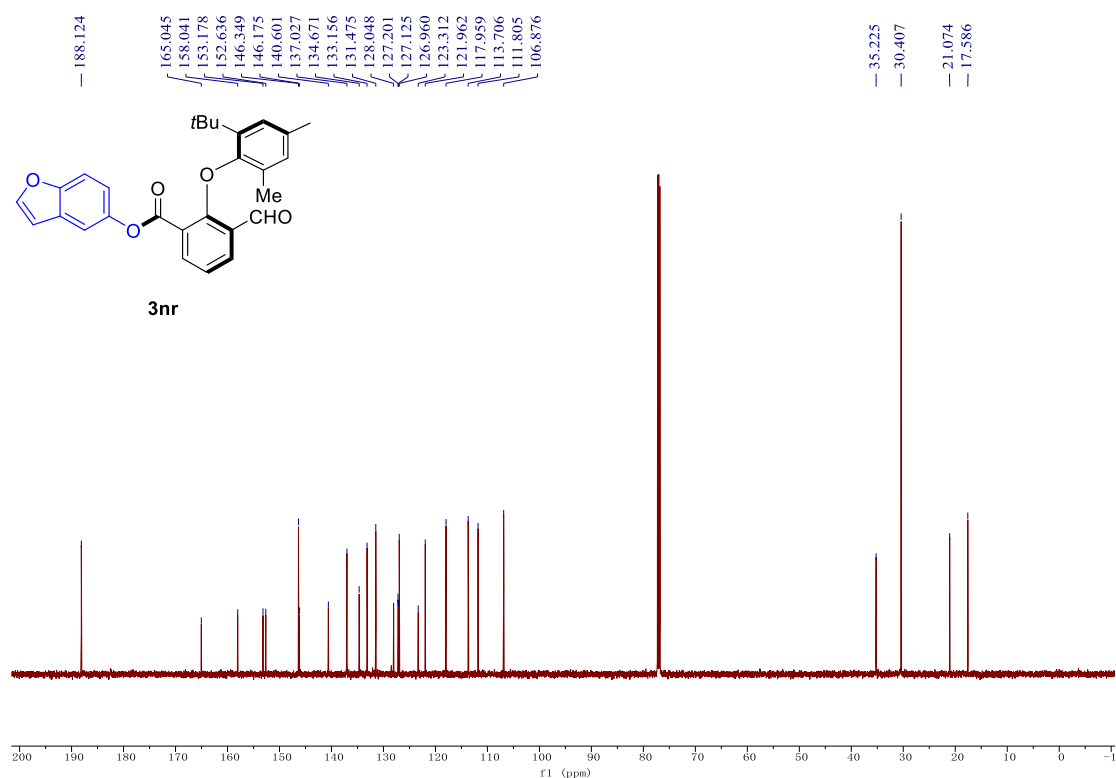

$^{13}\text{C}$  NMR (150 MHz,  $\text{CDCl}_3$ ) spectrum of **3nr**.

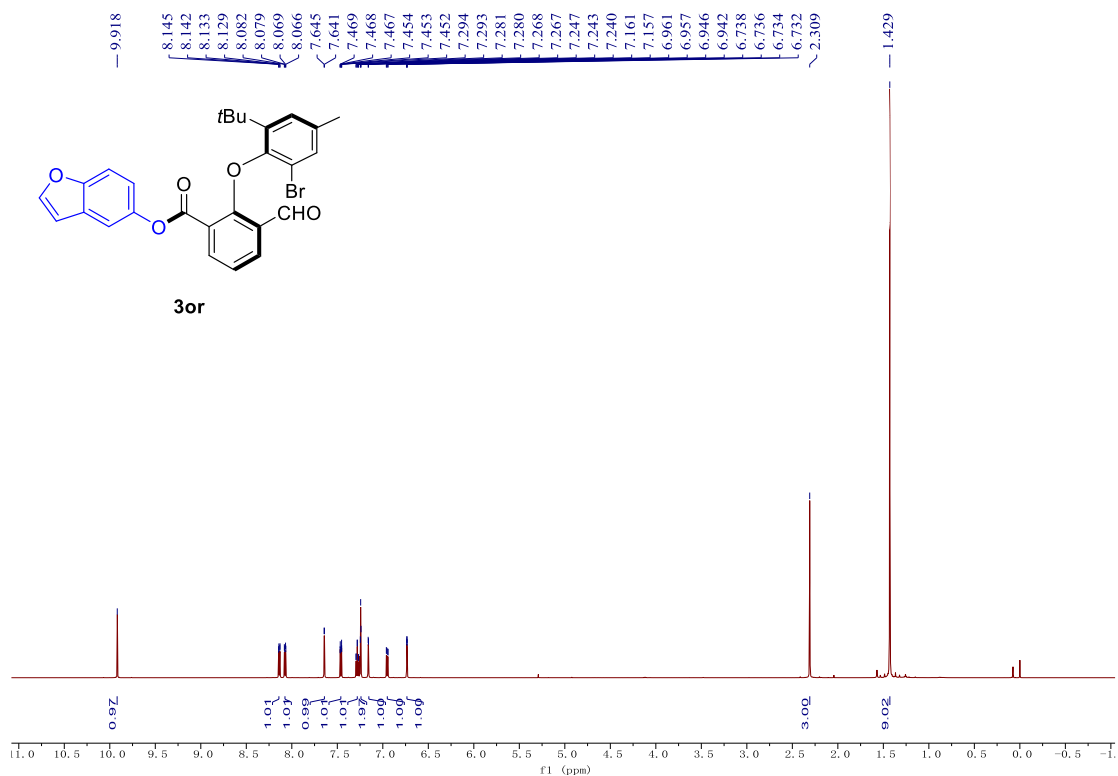

$^1\text{H}$  NMR (500 MHz,  $\text{CDCl}_3$ ) spectrum of **3or**.

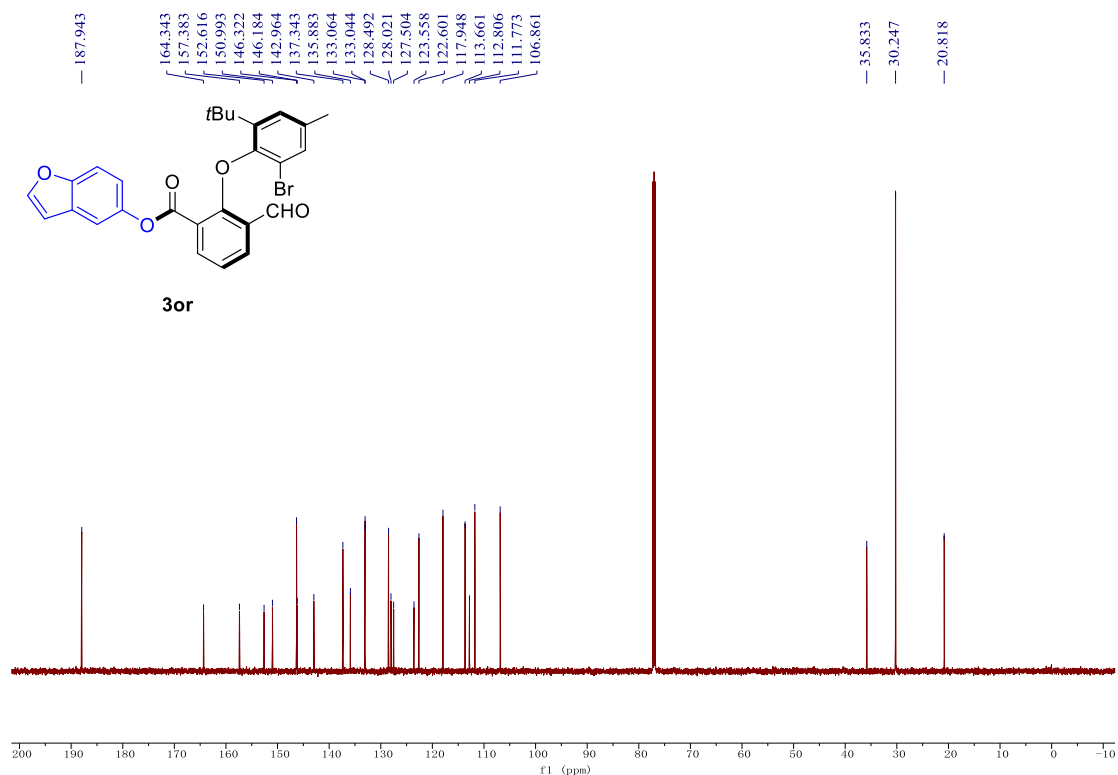

$^{13}\text{C}$  NMR (150 MHz,  $\text{CDCl}_3$ ) spectrum of **3or**.

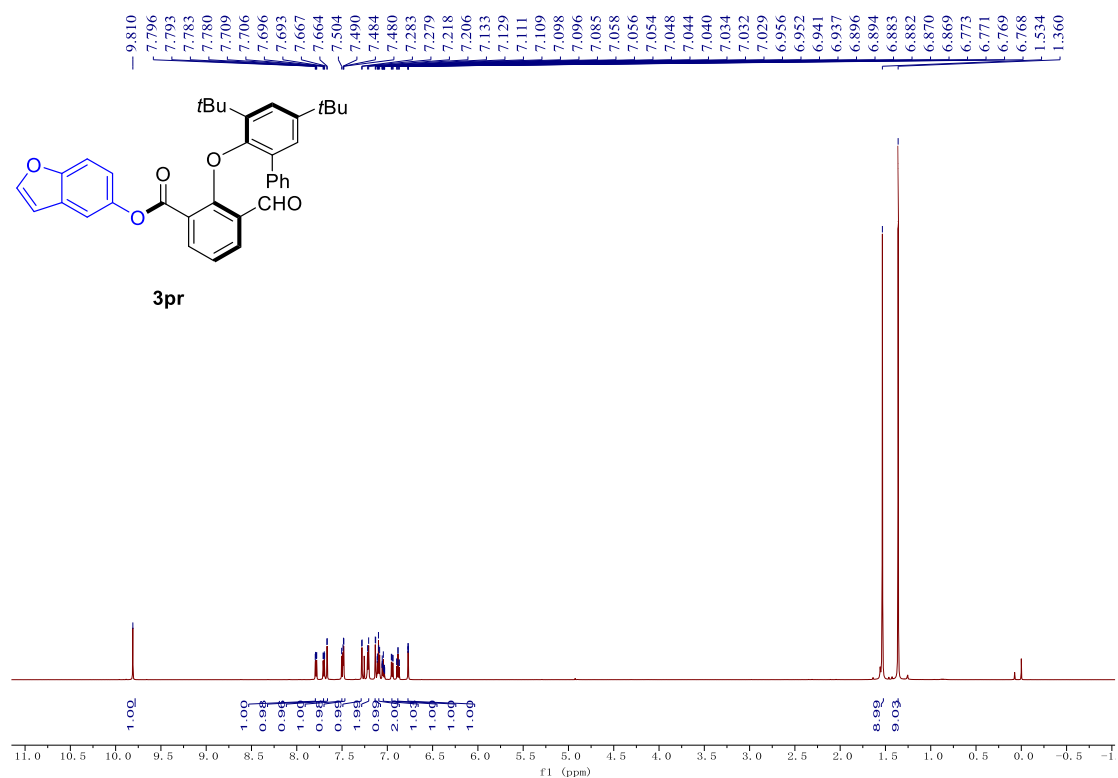

**<sup>1</sup>H NMR (500 MHz, CDCl<sub>3</sub>) spectrum of 3pr.**

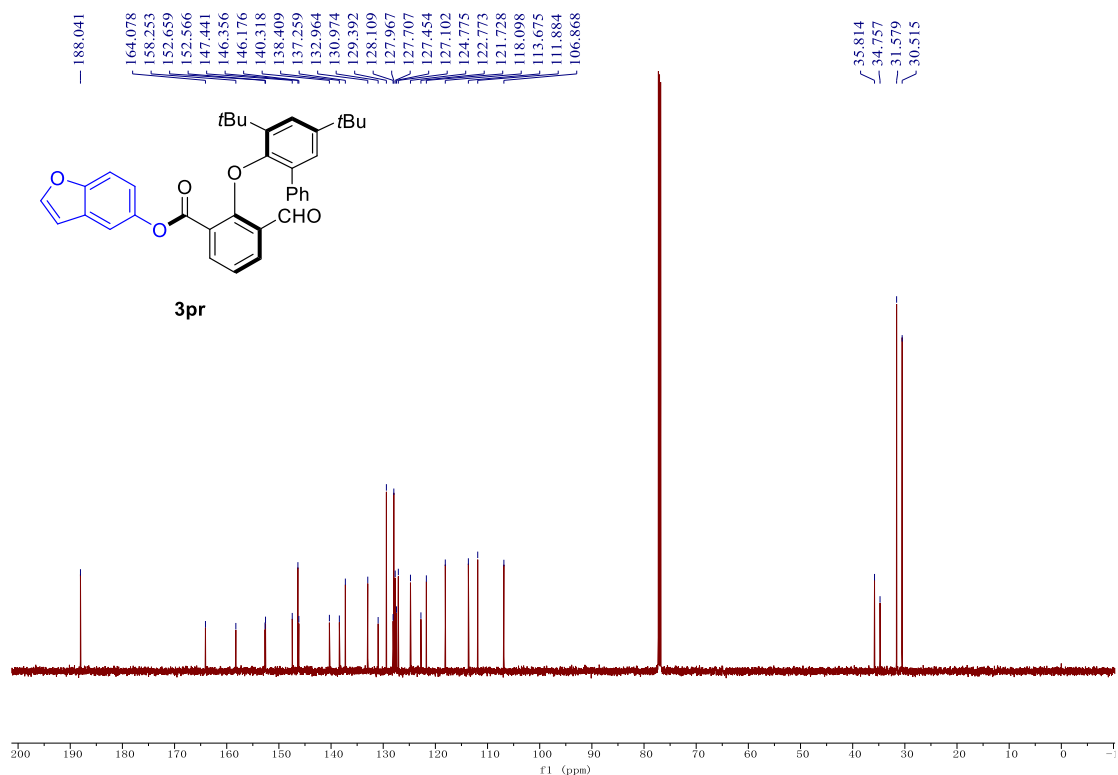

**<sup>13</sup>C NMR (150 MHz, CDCl<sub>3</sub>) spectrum of 3pr.**

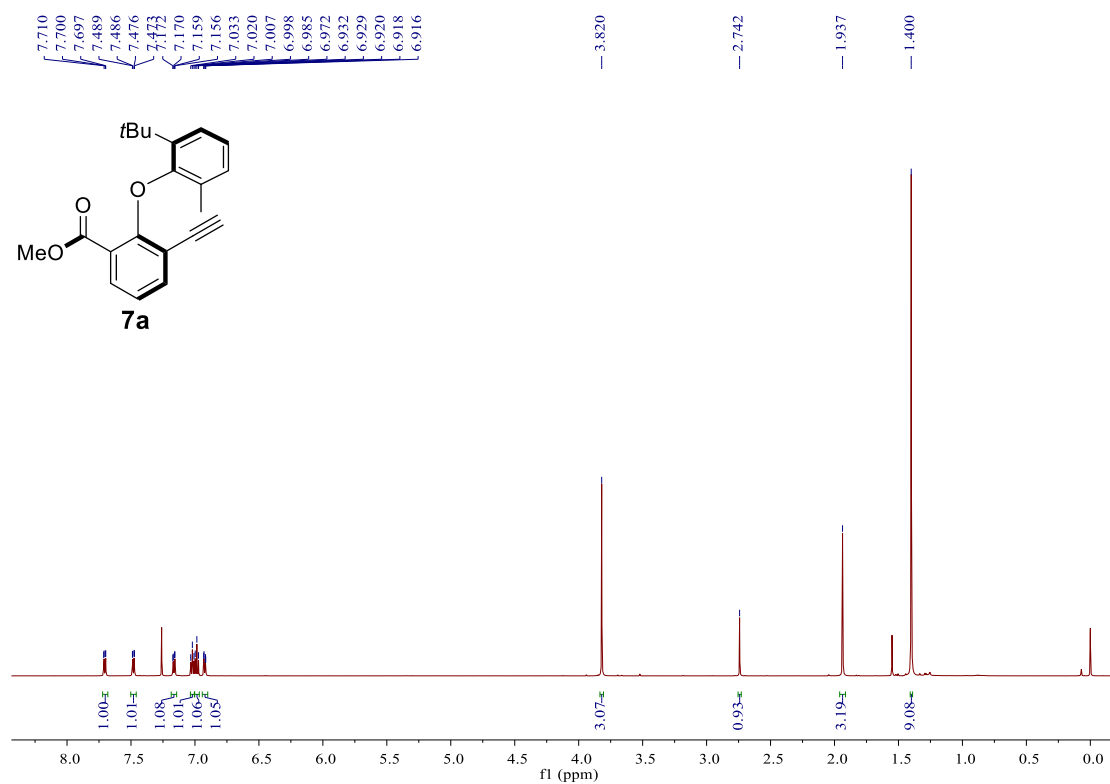

**<sup>1</sup>H NMR (500 MHz, CDCl<sub>3</sub>) spectrum of 7a.**

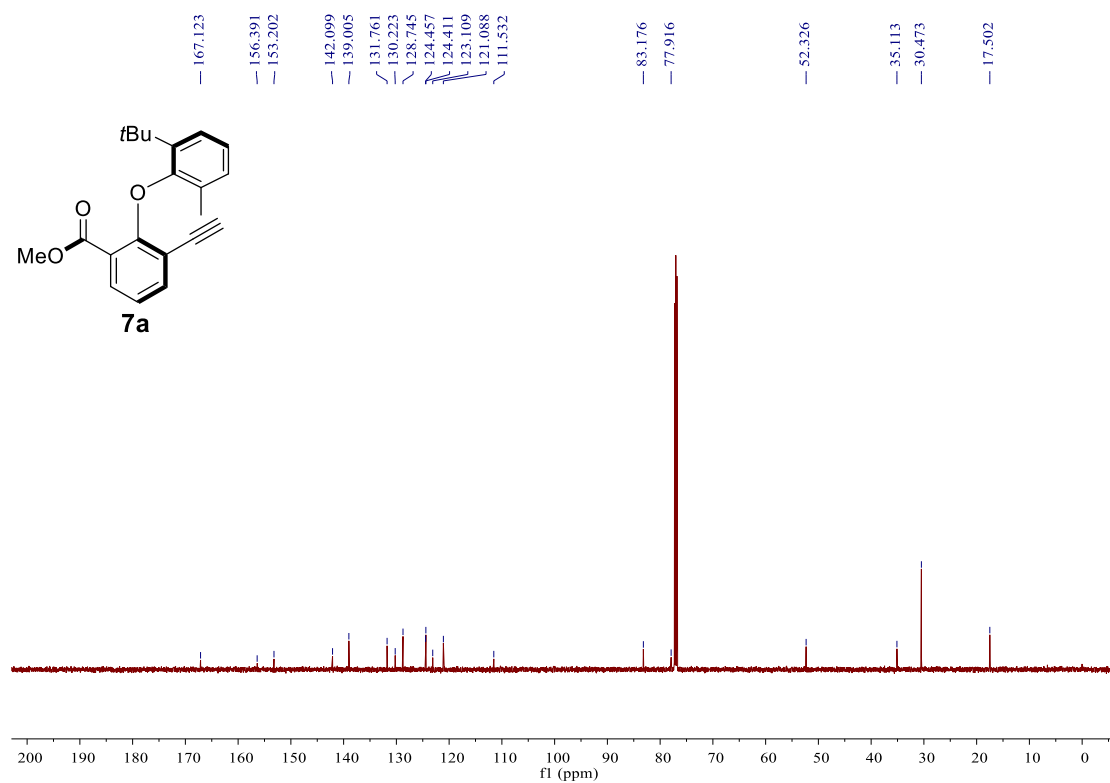

**<sup>13</sup>C NMR (150 MHz, CDCl<sub>3</sub>) spectrum of 7a.**

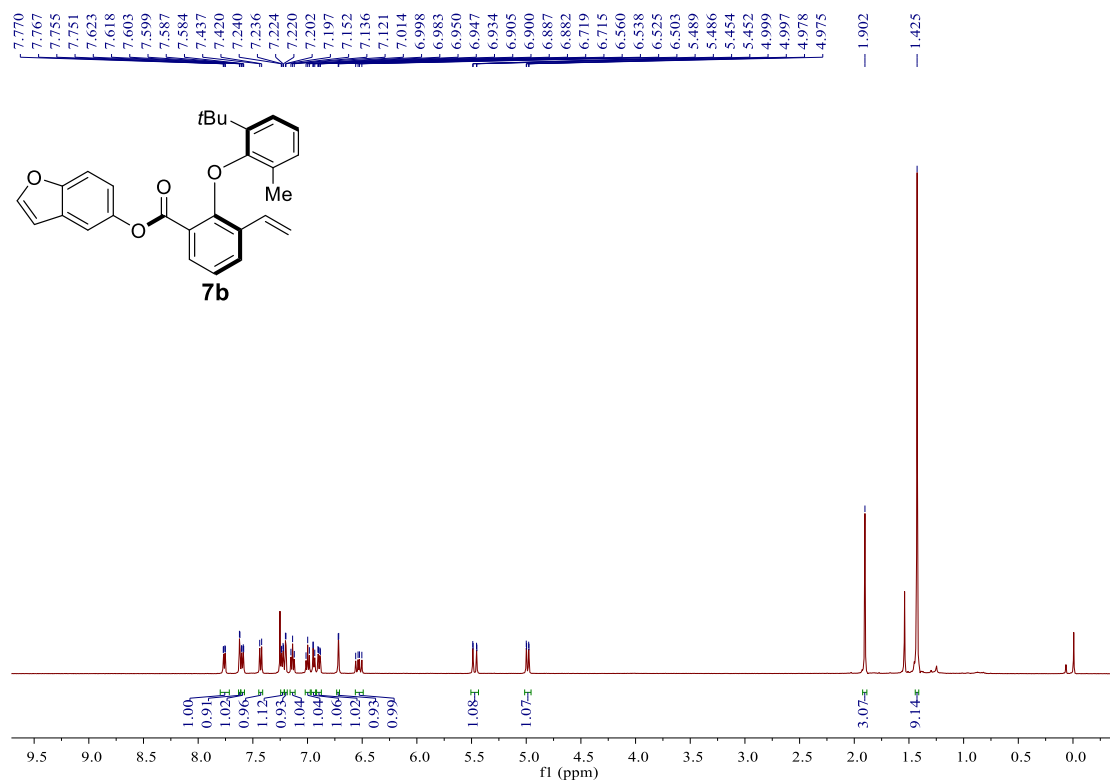

**<sup>1</sup>H NMR (500 MHz, CDCl<sub>3</sub>) spectrum of 7b.**

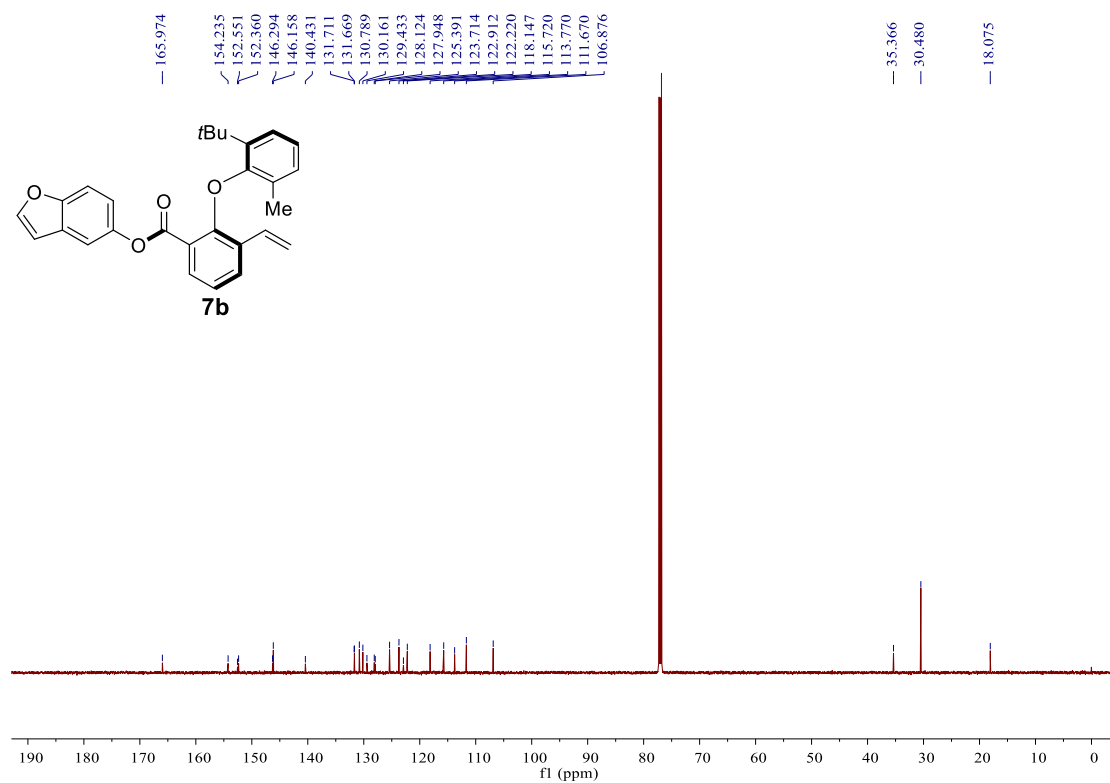

**<sup>13</sup>C NMR (150 MHz, CDCl<sub>3</sub>) spectrum of 7b.**

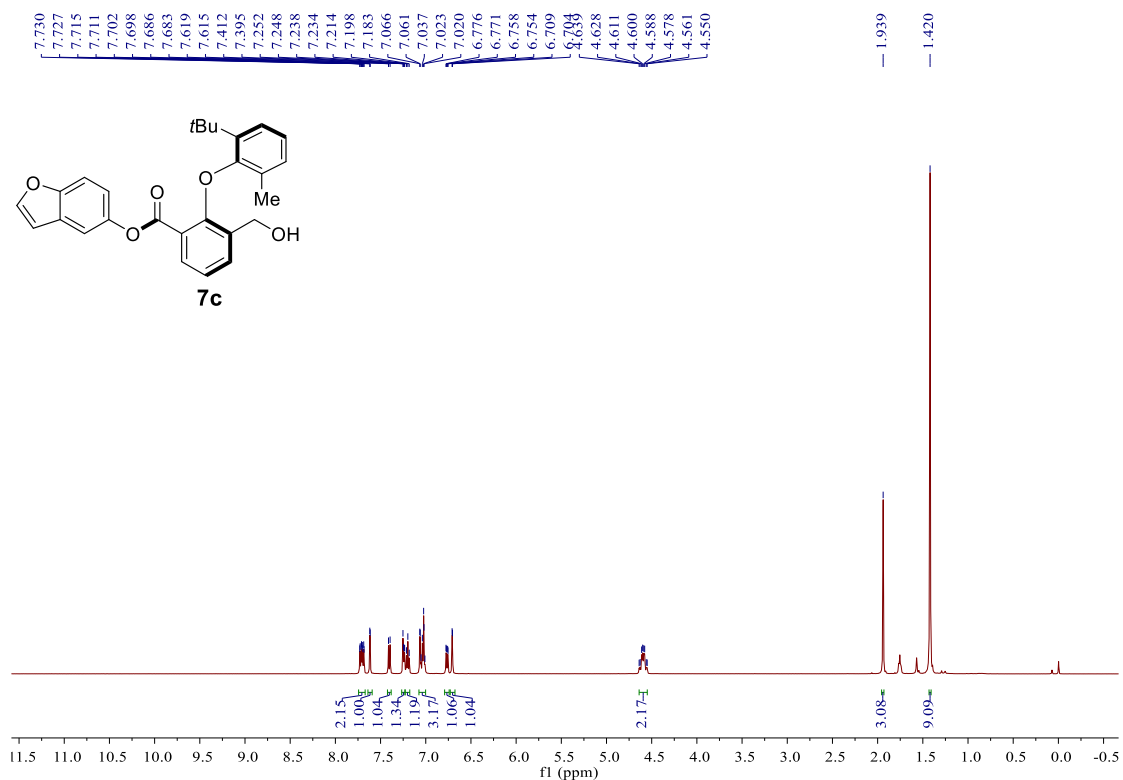

**<sup>1</sup>H NMR (500 MHz, CDCl<sub>3</sub>) spectrum of 7c.**

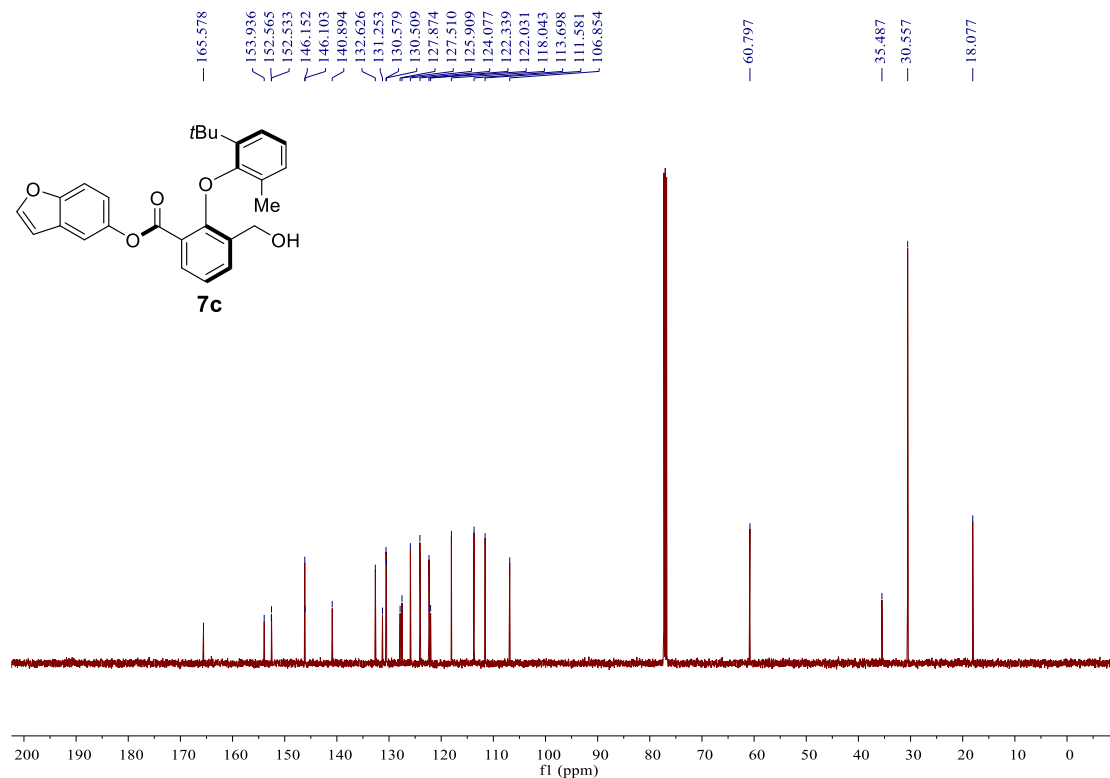

**<sup>13</sup>C NMR (150 MHz, CDCl<sub>3</sub>) spectrum of 7c.**

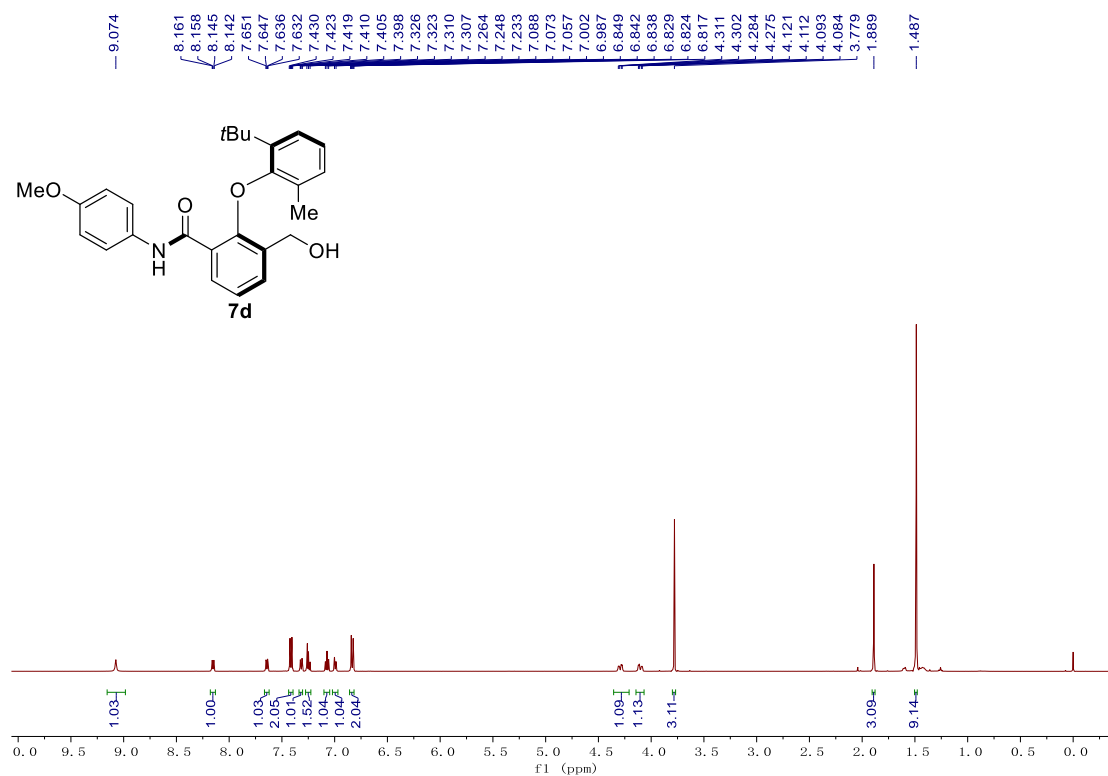

**<sup>1</sup>H NMR (500 MHz, CD<sub>3</sub>OD) spectrum of **7d**.**

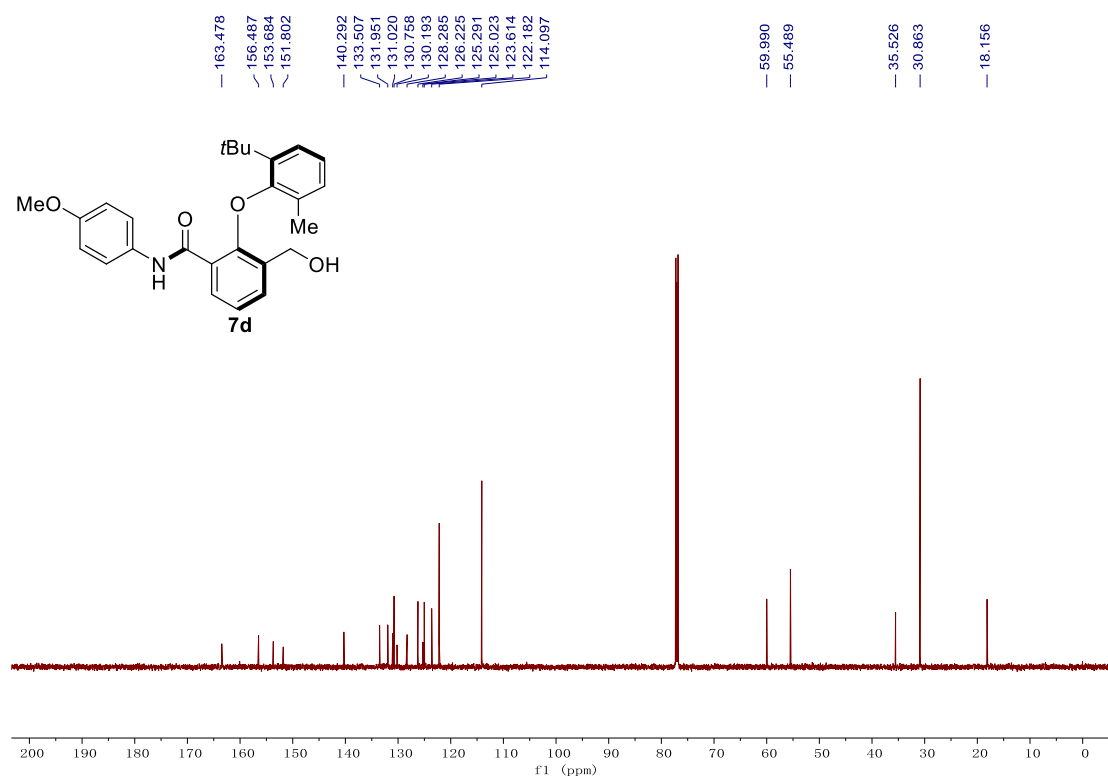

**<sup>13</sup>C NMR (150 MHz, CDCl<sub>3</sub>) spectrum of **7d**.**

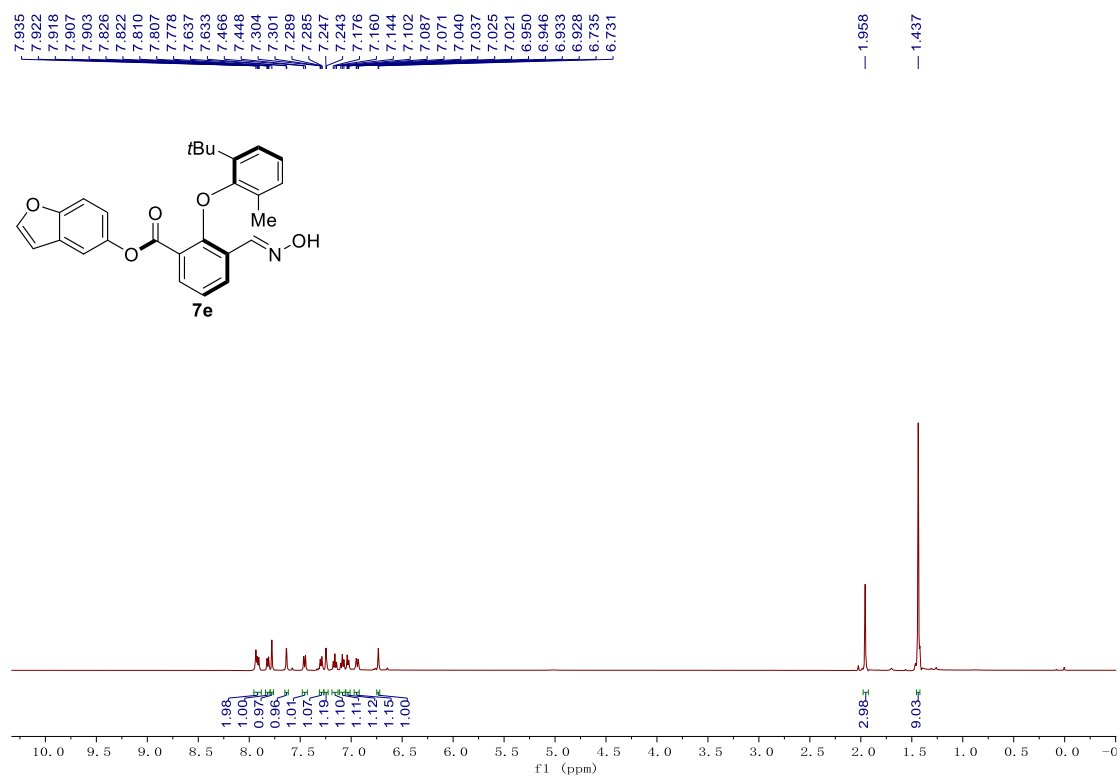

**<sup>1</sup>H NMR (500 MHz, CDCl<sub>3</sub>) spectrum of 7e.**

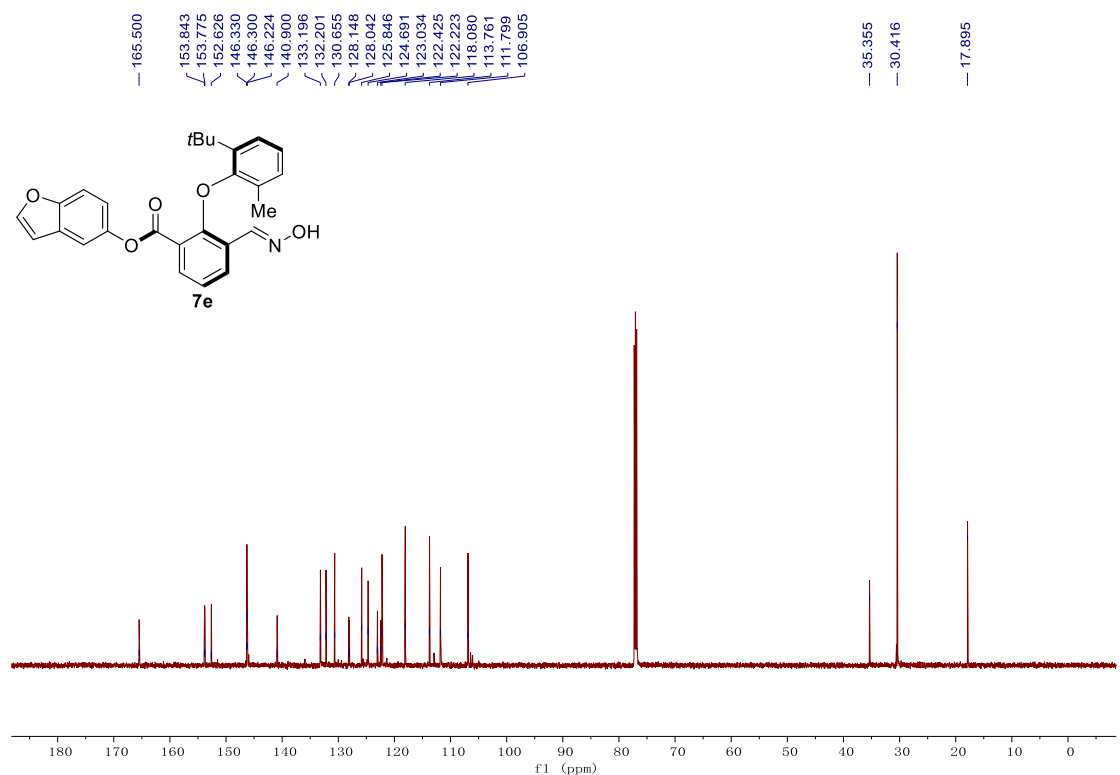

**<sup>13</sup>C NMR (150 MHz, CDCl<sub>3</sub>) spectrum of 7e.**

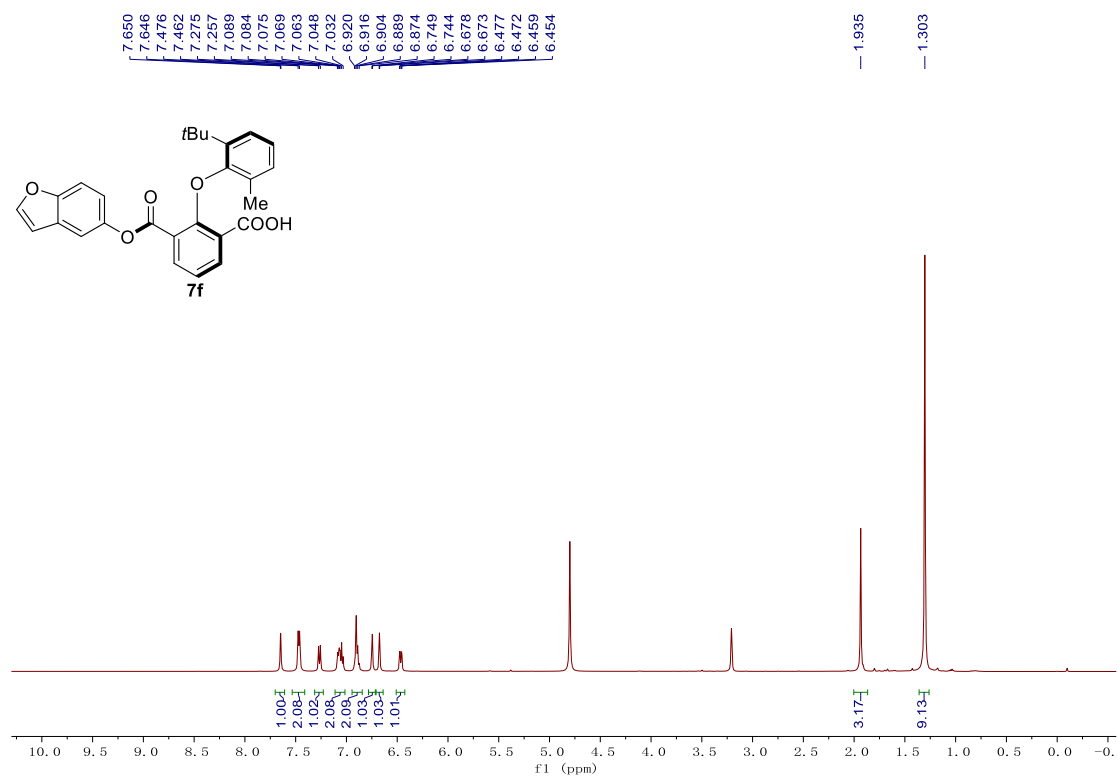

**<sup>1</sup>H NMR (500 MHz, CD<sub>3</sub>OD) spectrum of 7f.**

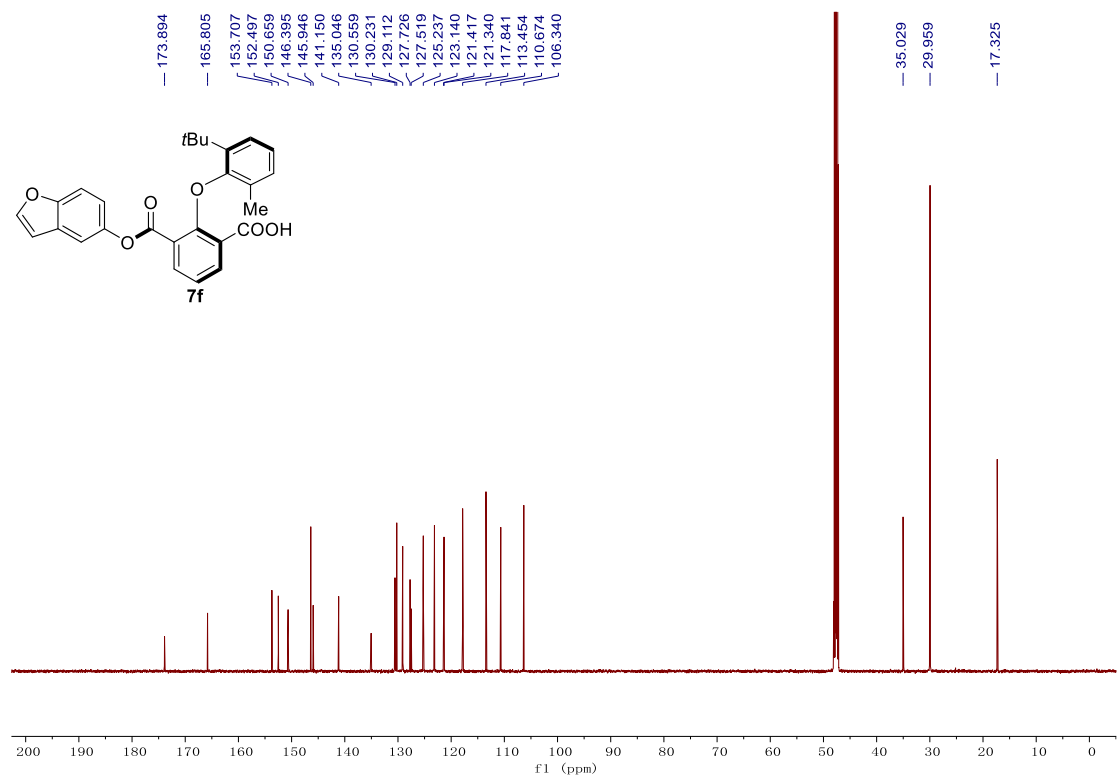

**<sup>13</sup>C NMR (150 MHz, CD<sub>3</sub>OD) spectrum of 7f.**

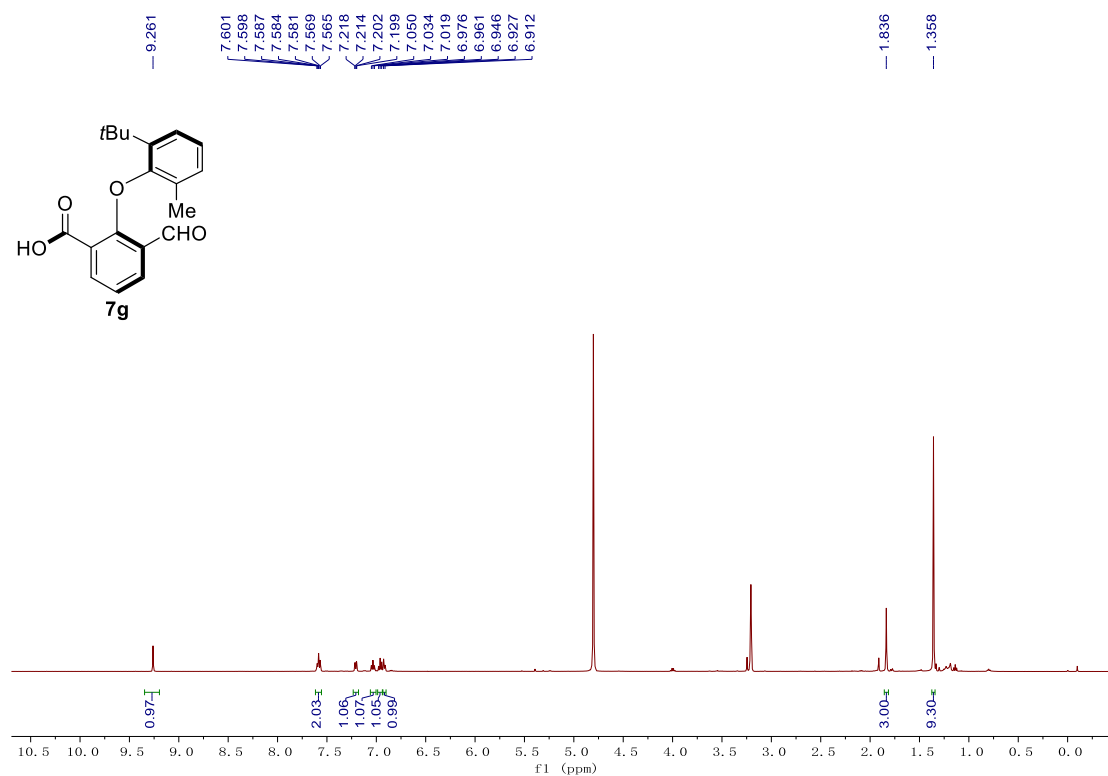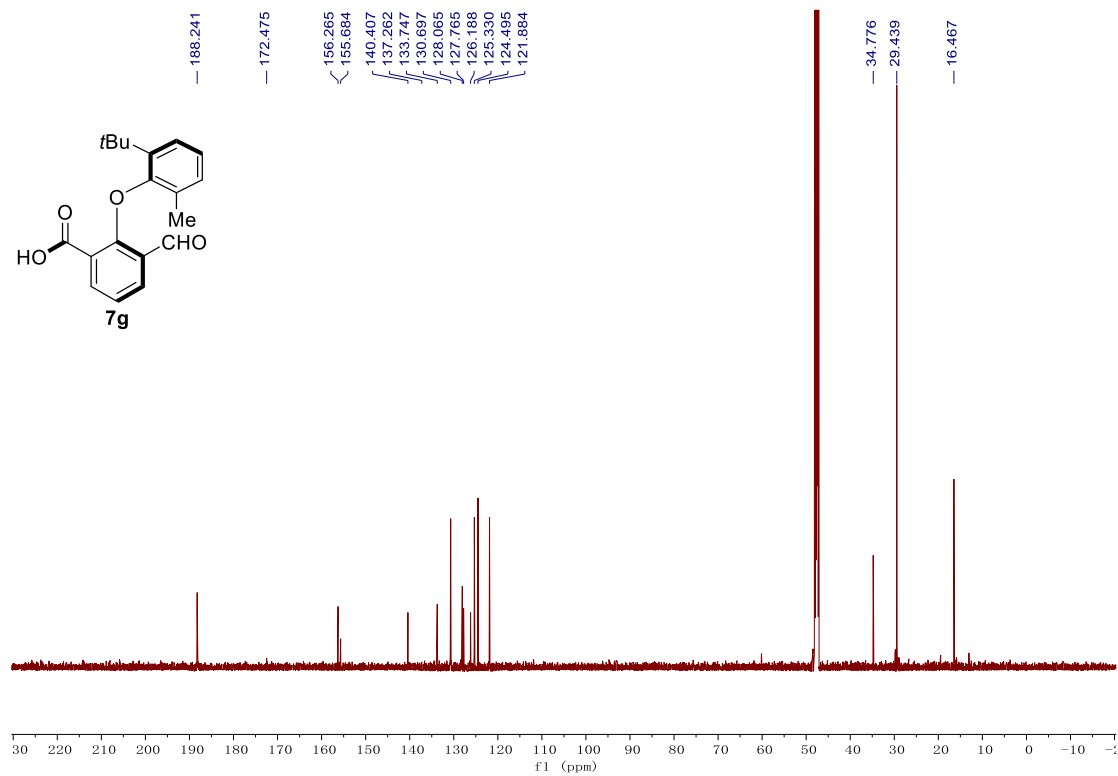

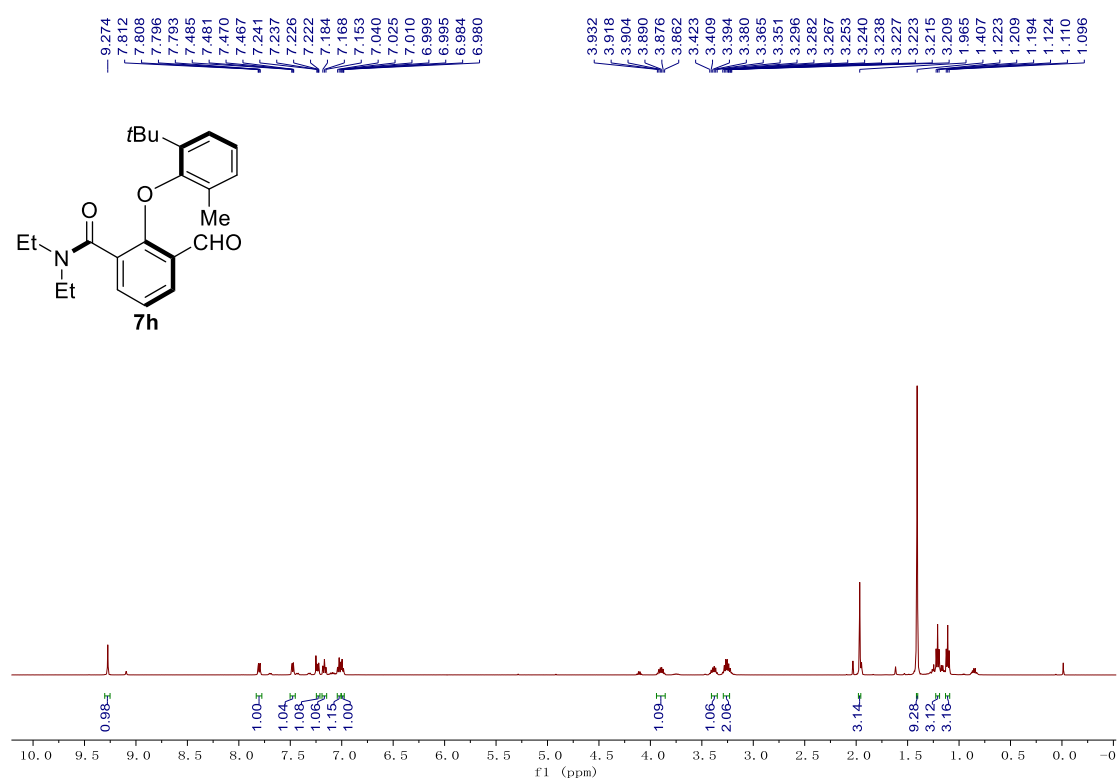

**$^1\text{H}$  NMR (500 MHz,  $\text{CDCl}_3$ ) spectrum of **7h**.**

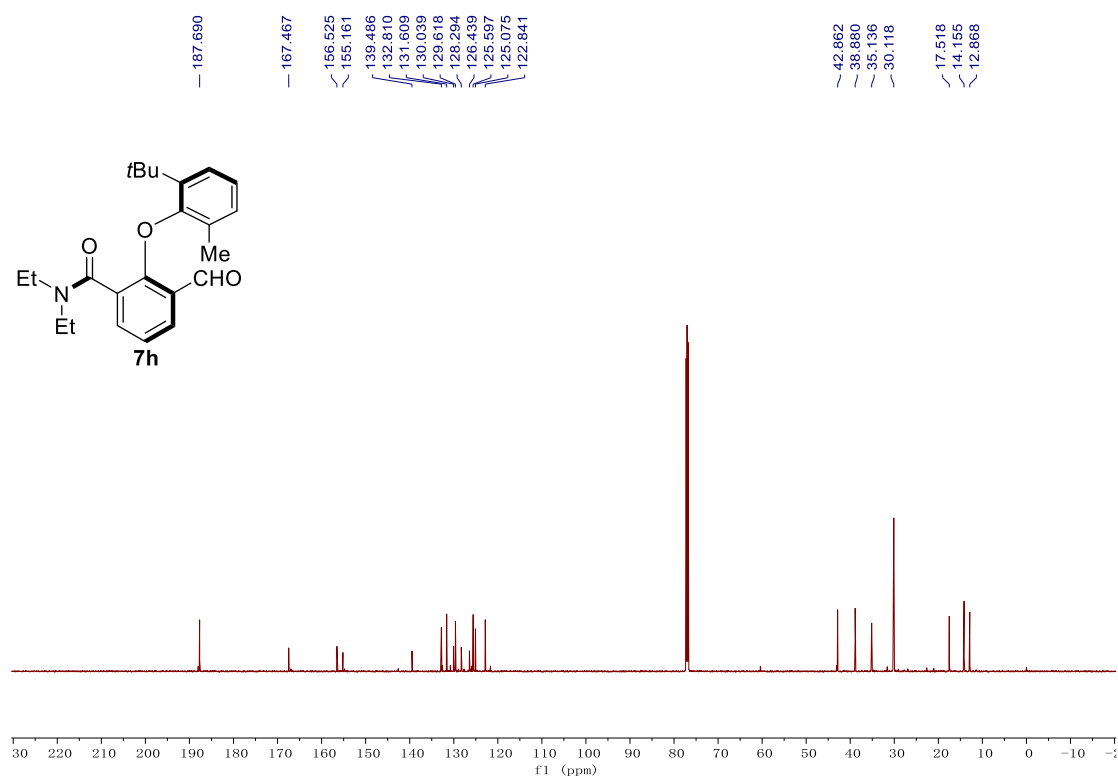

**$^{13}\text{C}$  NMR (150 MHz,  $\text{CDCl}_3$ ) spectrum of **7h**.**

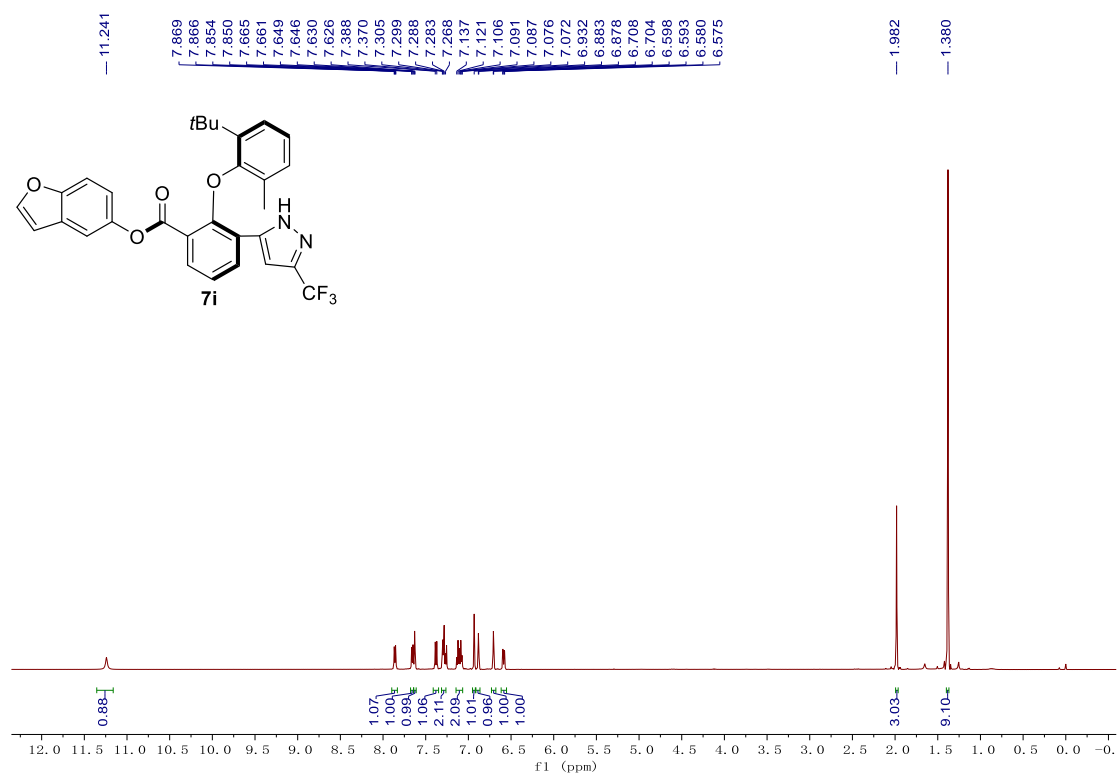

**<sup>1</sup>H NMR (500 MHz, CD<sub>3</sub>OD) spectrum of 7i.**

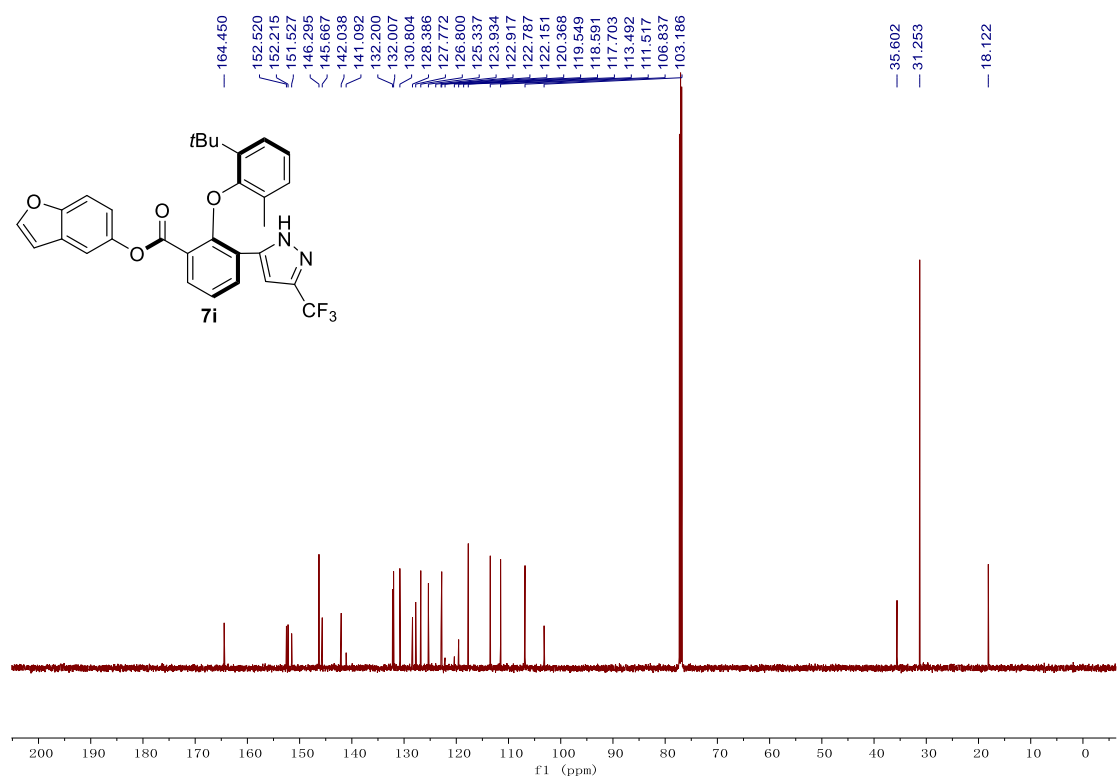

**<sup>13</sup>C NMR (150 MHz, CDCl<sub>3</sub>) spectrum of 7i.**

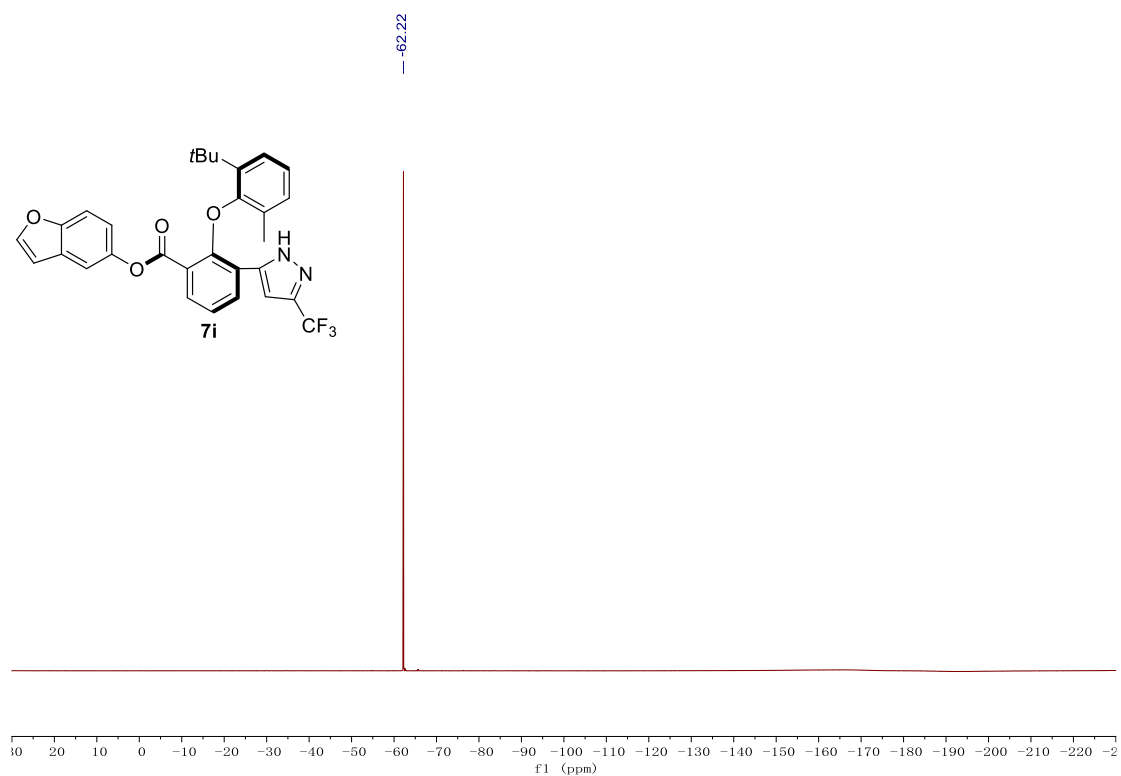

**<sup>19</sup>F NMR (565 MHz, CDCl<sub>3</sub>) spectrum of **7i**.**

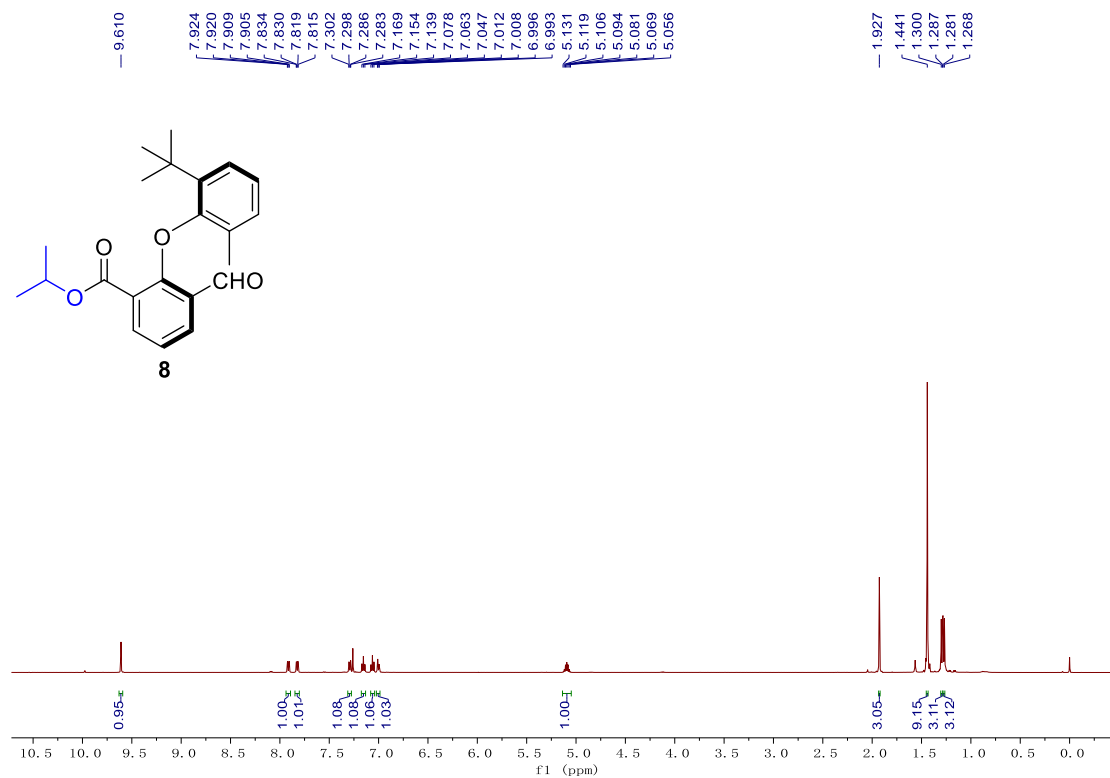

**<sup>1</sup>H NMR (500 MHz, CDCl<sub>3</sub>) spectrum of **8**.**

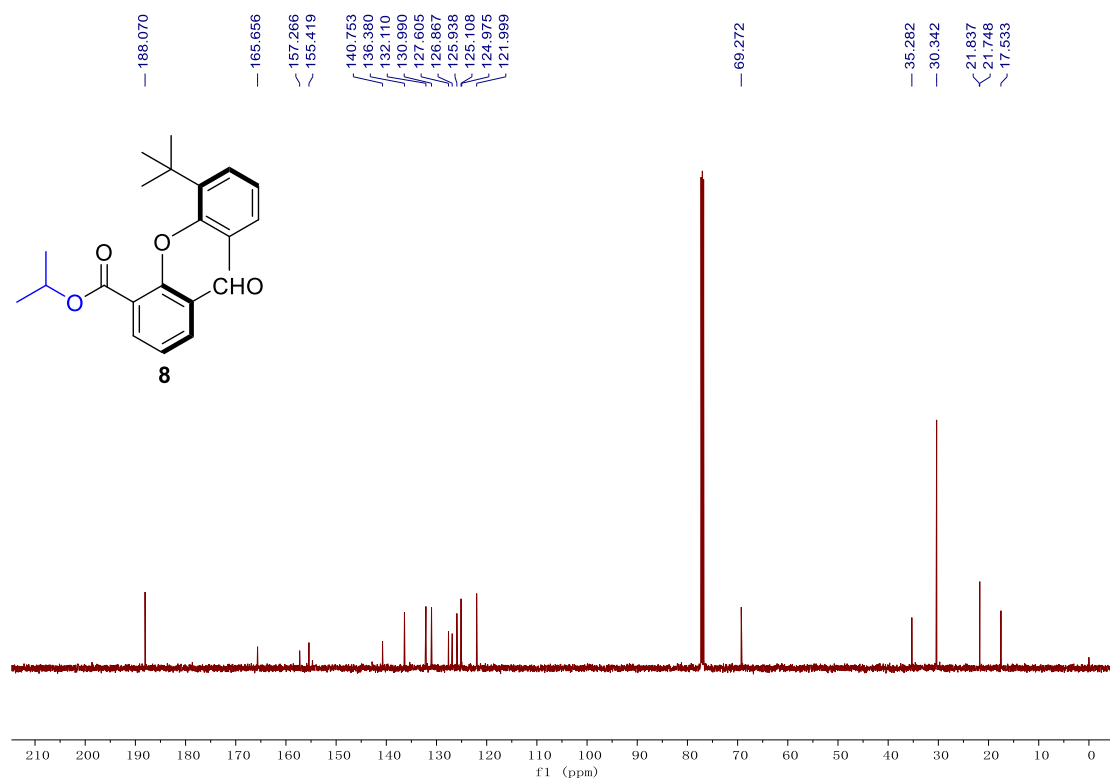

**<sup>13</sup>C NMR (125 MHz, CDCl<sub>3</sub>) spectrum of 8.**

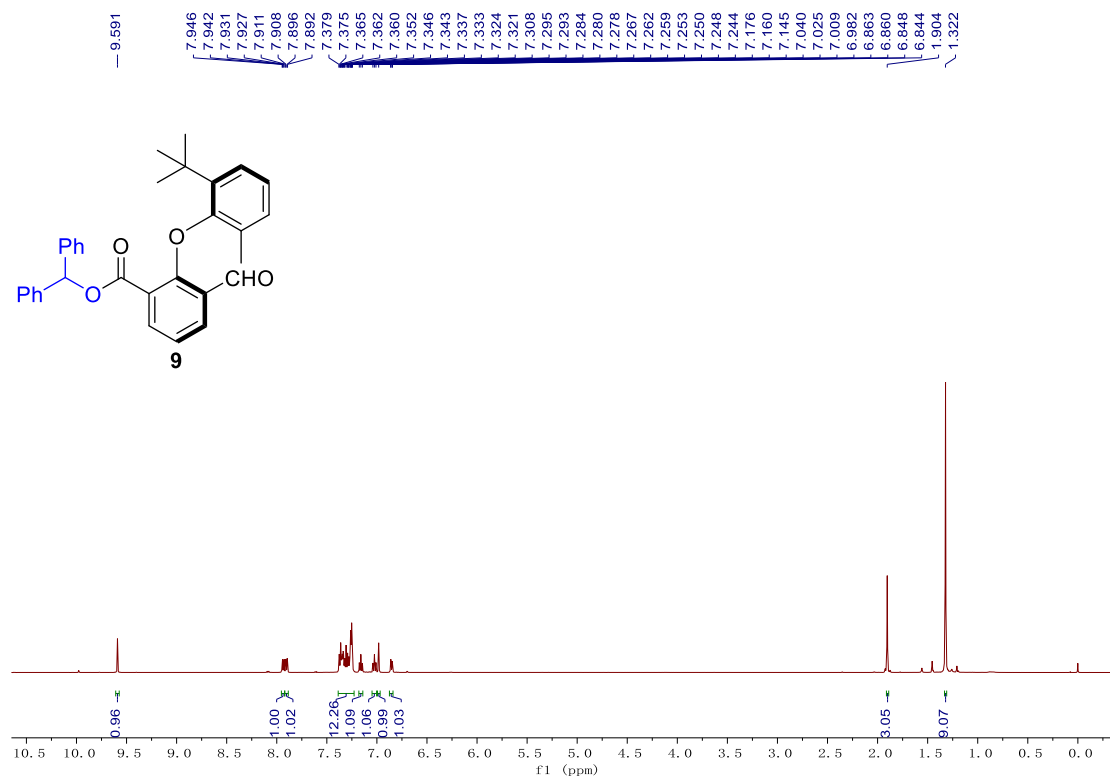

**<sup>1</sup>H NMR (500 MHz, CDCl<sub>3</sub>) spectrum of 9.**

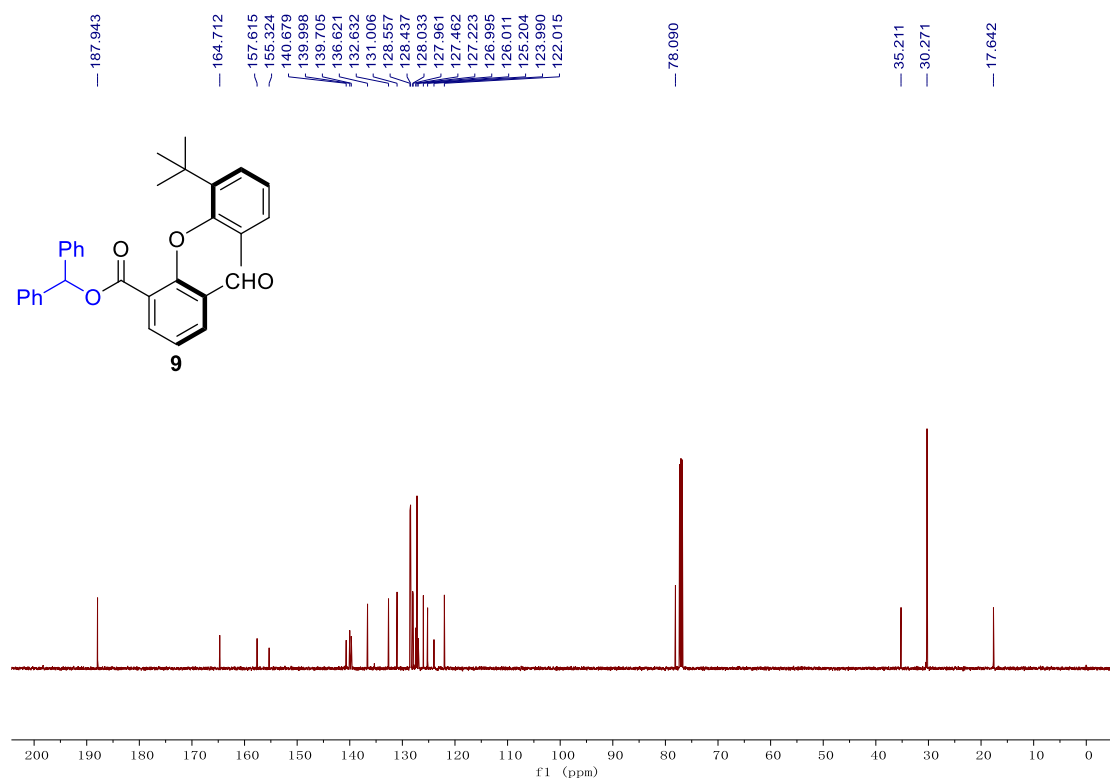

**<sup>13</sup>C NMR (125 MHz, CDCl<sub>3</sub>) spectrum of 9.**

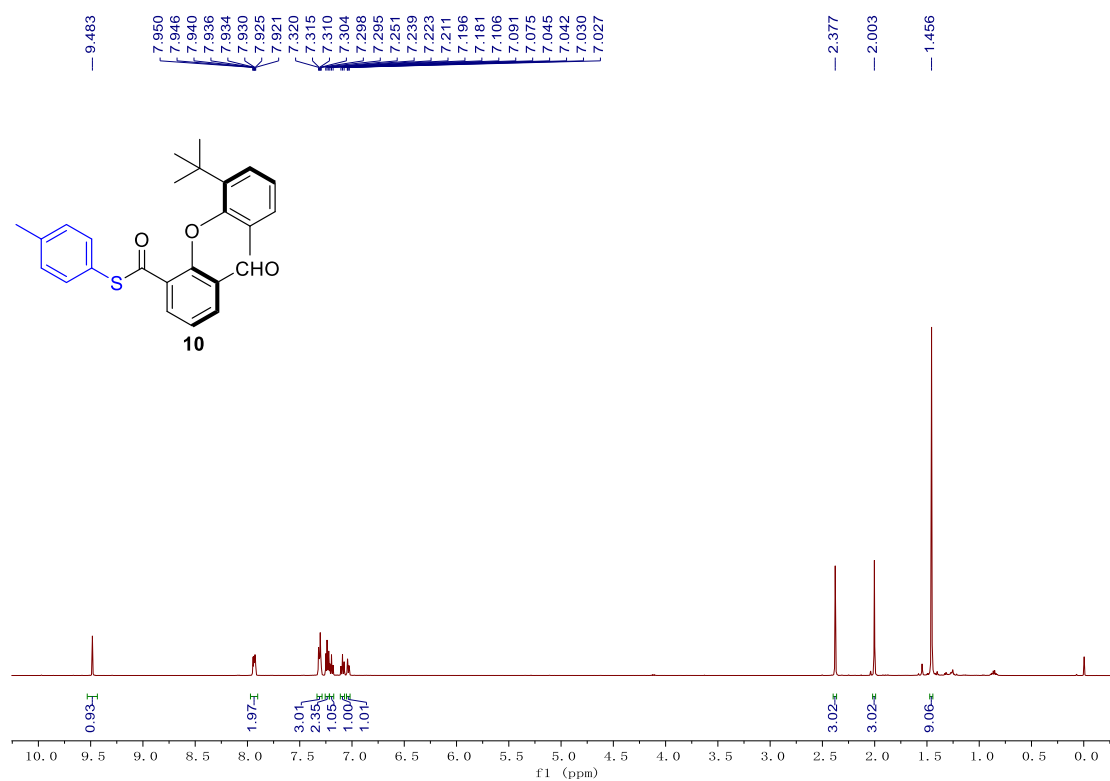

**<sup>1</sup>H NMR (500 MHz, CDCl<sub>3</sub>) spectrum of 10.**

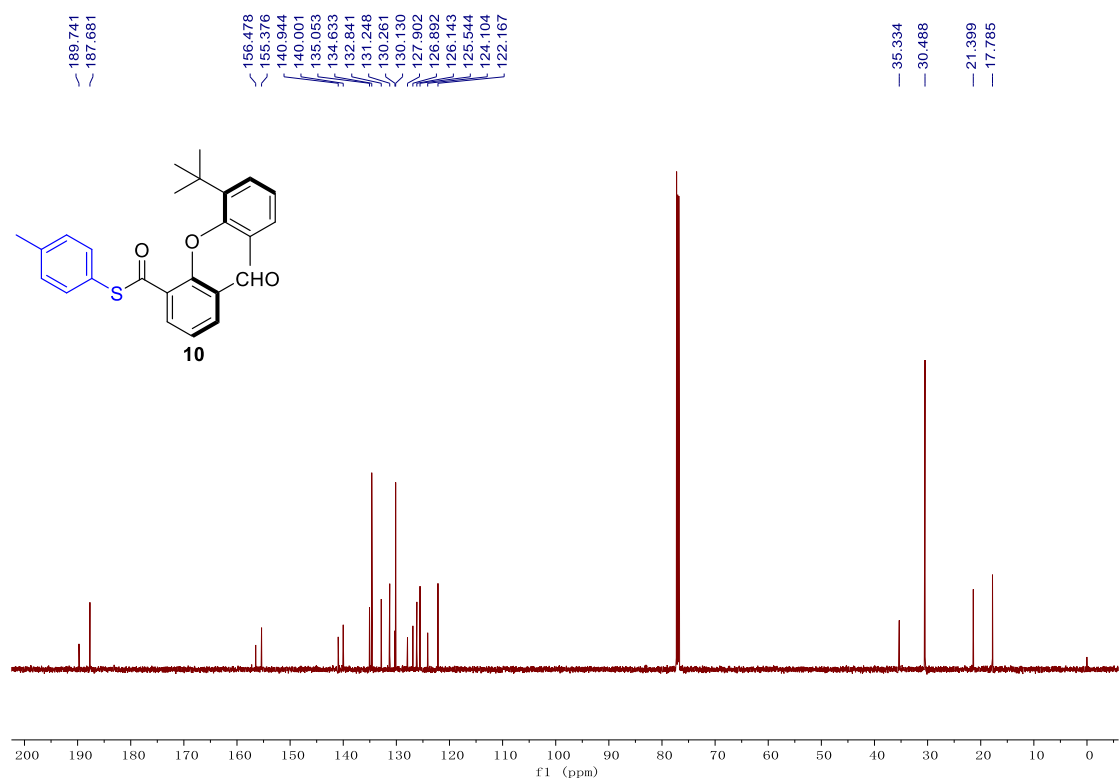

$^{13}\text{C}$  NMR (150 MHz,  $\text{CDCl}_3$ ) spectrum of 10.

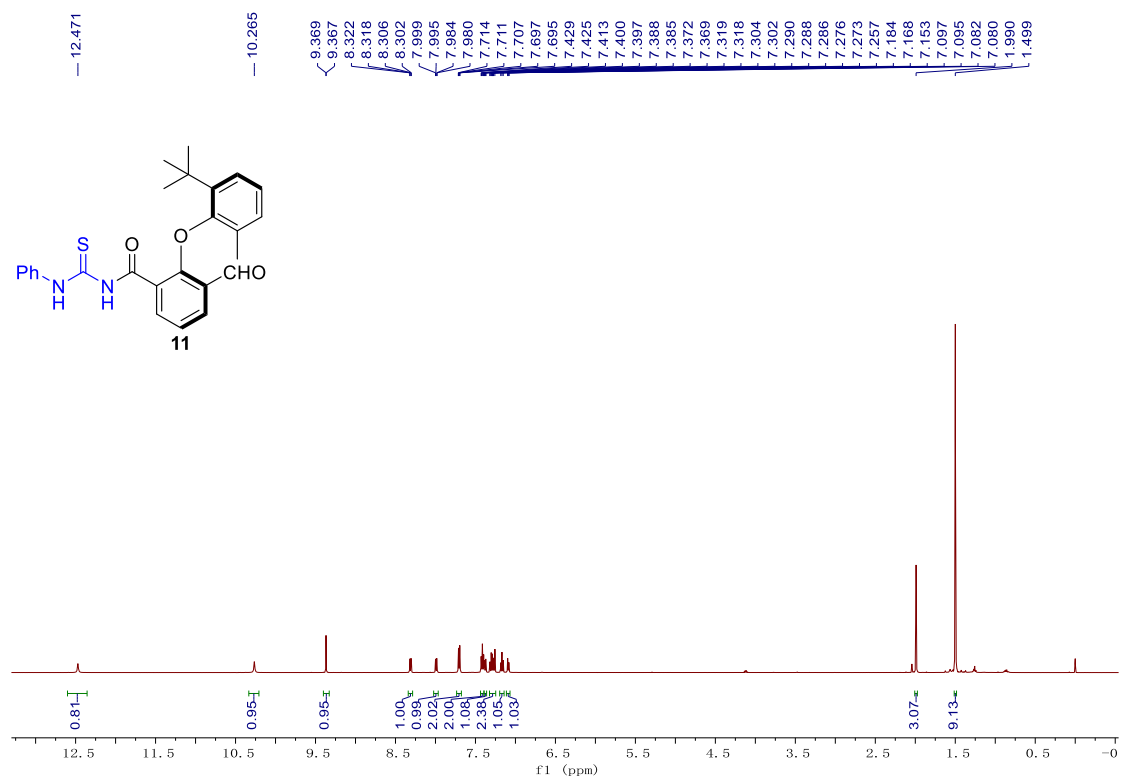

$^1\text{H}$  NMR (500 MHz,  $\text{CDCl}_3$ ) spectrum of 11.

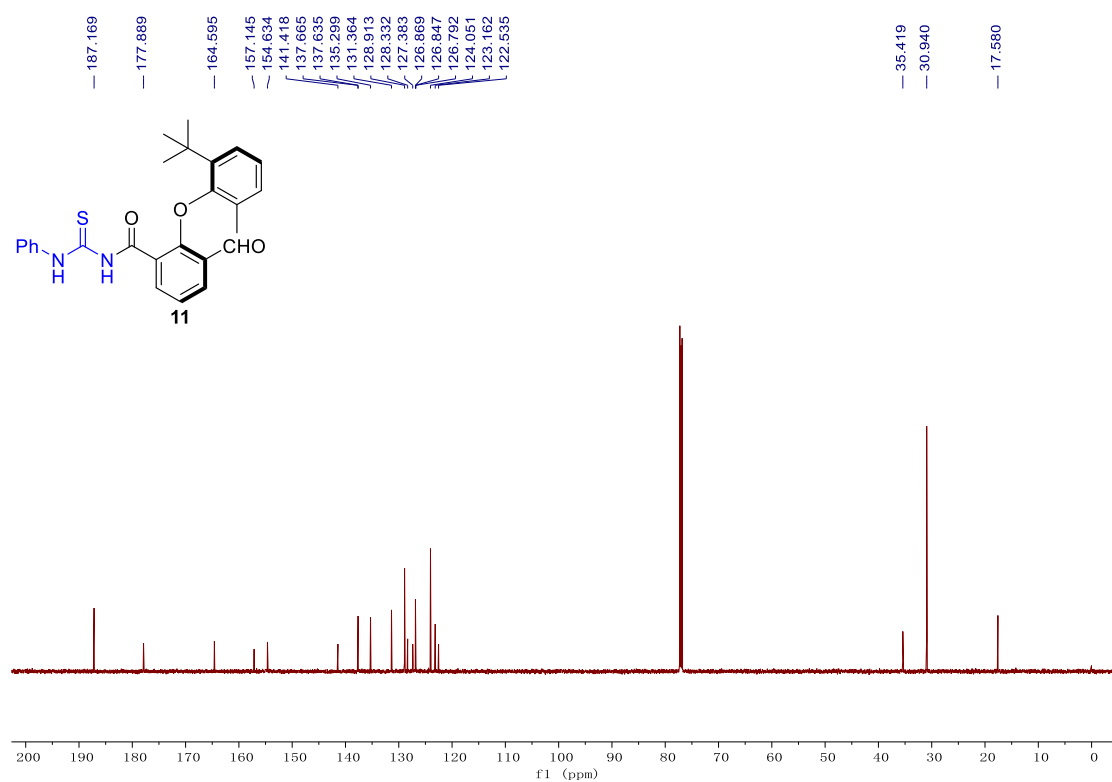

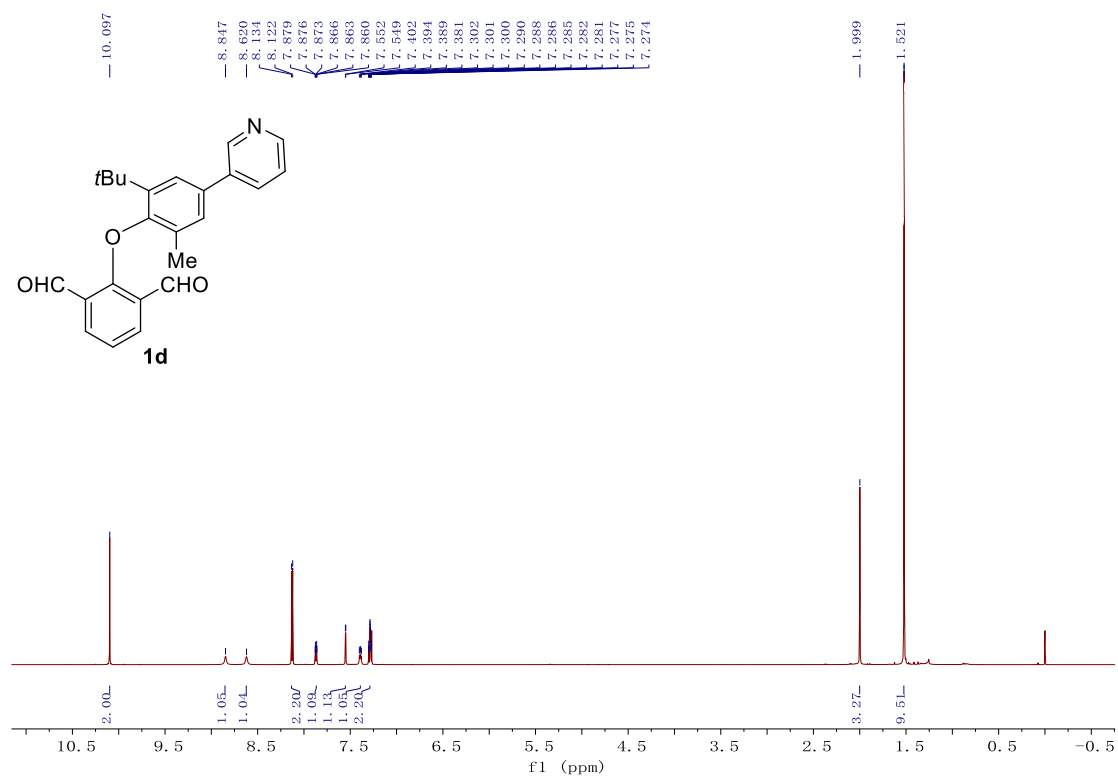

**<sup>1</sup>H NMR (600 MHz, CDCl<sub>3</sub>) spectrum of 1d.**

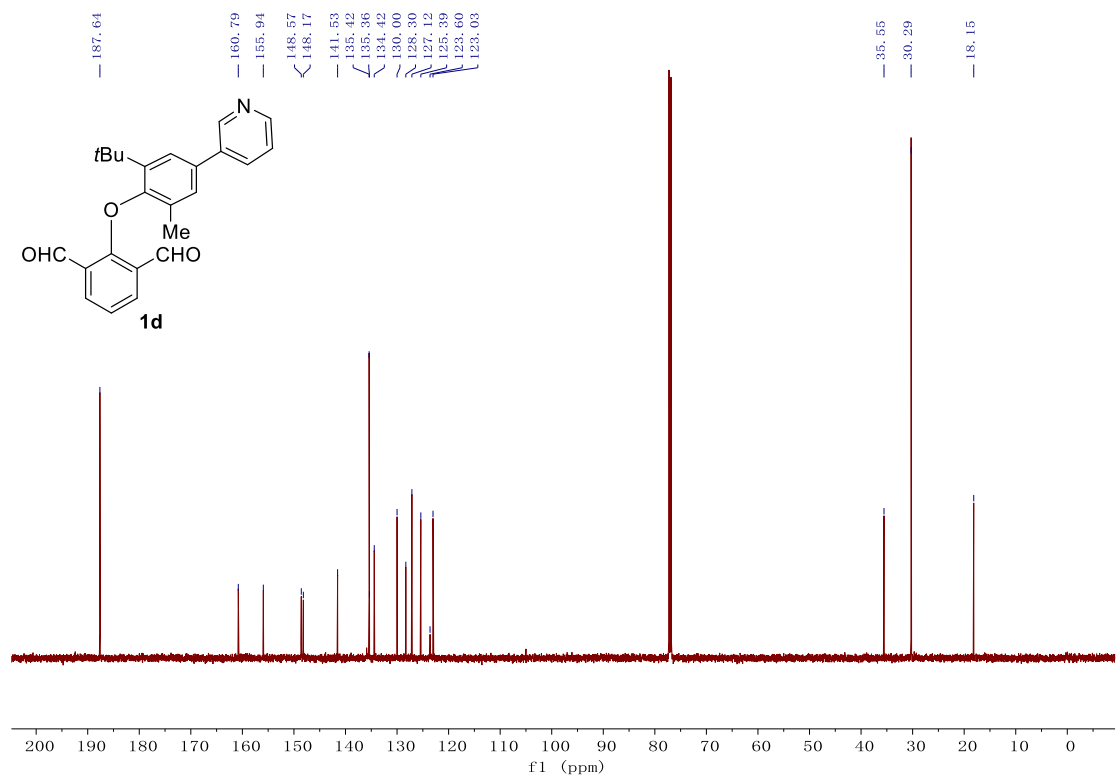

**<sup>13</sup>C NMR (150 MHz, CDCl<sub>3</sub>) spectrum of 1d.**

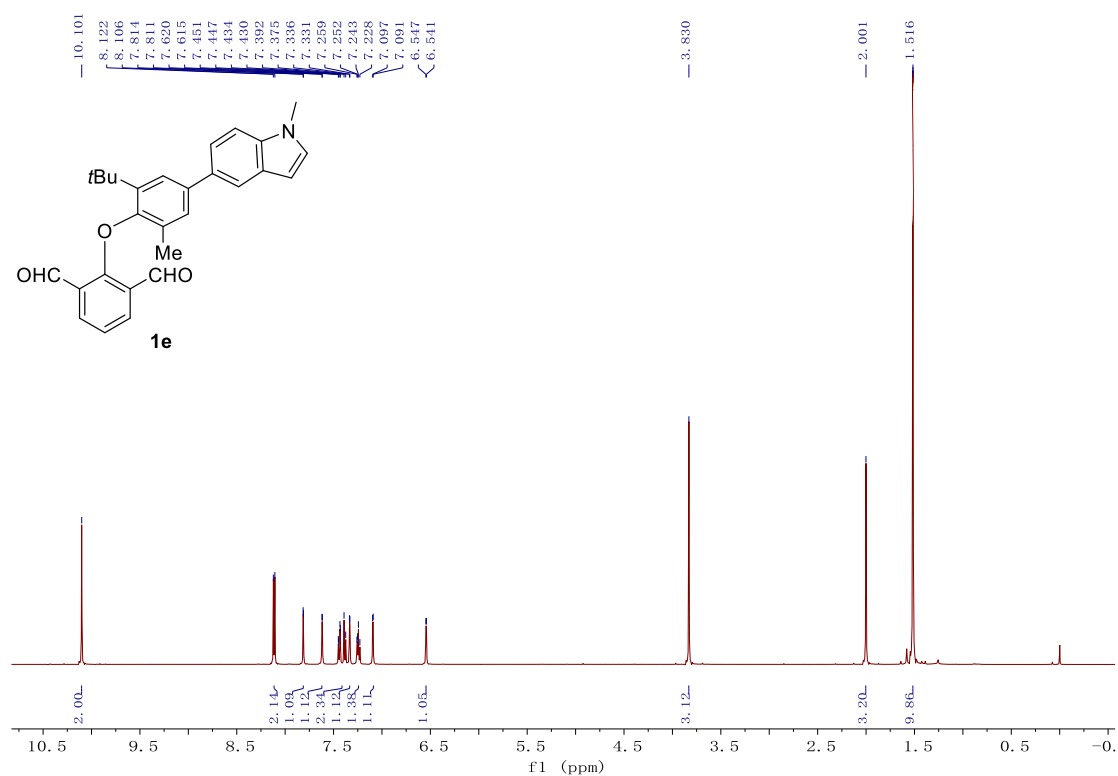

**<sup>1</sup>H NMR (500 MHz, CDCl<sub>3</sub>) spectrum of 1e.**

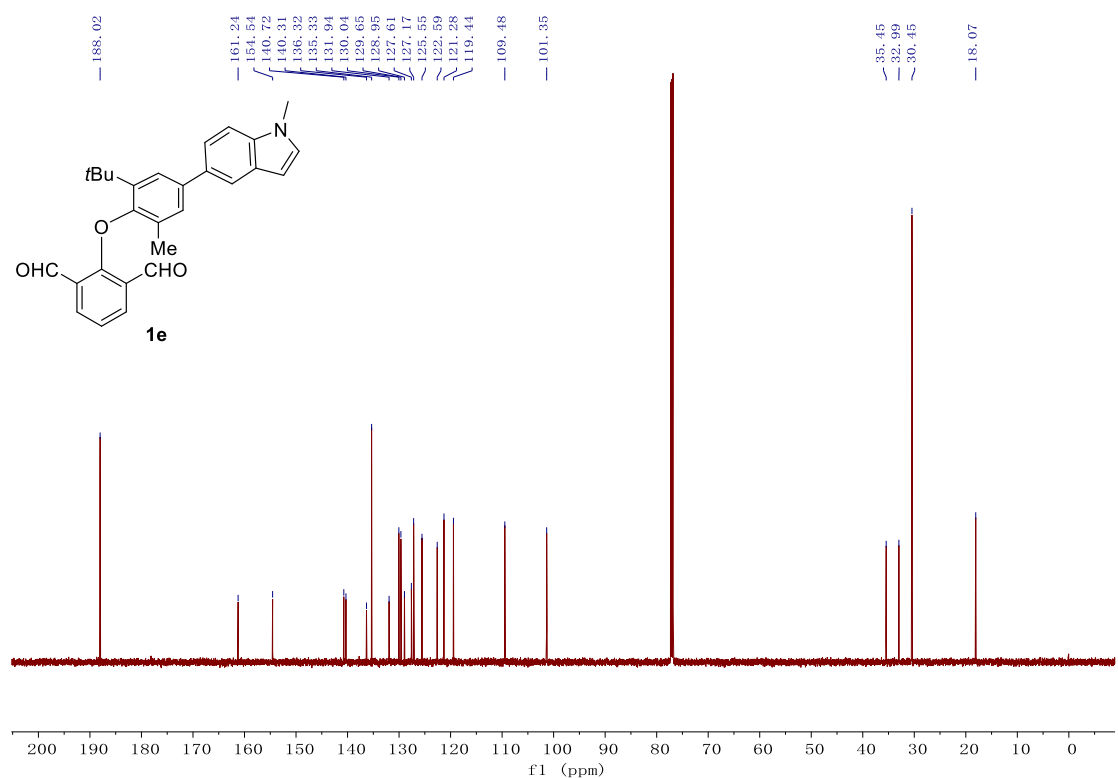

**<sup>13</sup>C NMR (150 MHz, CDCl<sub>3</sub>) spectrum of 1e.**

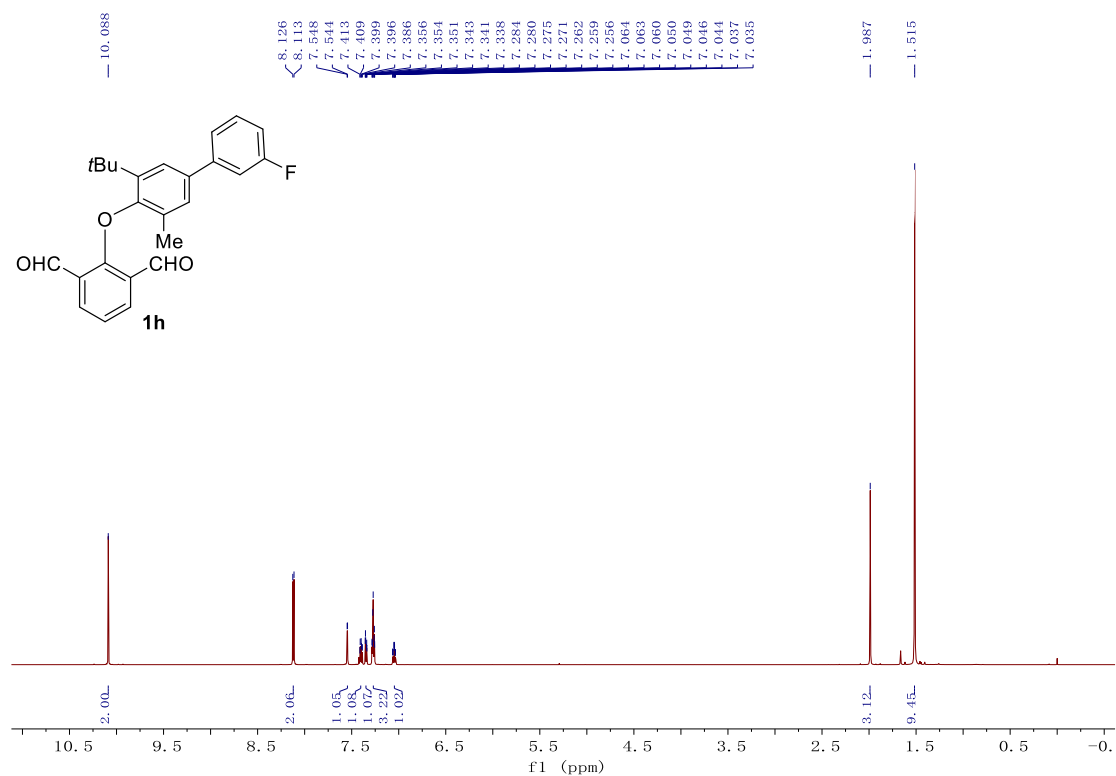

**<sup>1</sup>H NMR (500 MHz, CDCl<sub>3</sub>) spectrum of 1h.**

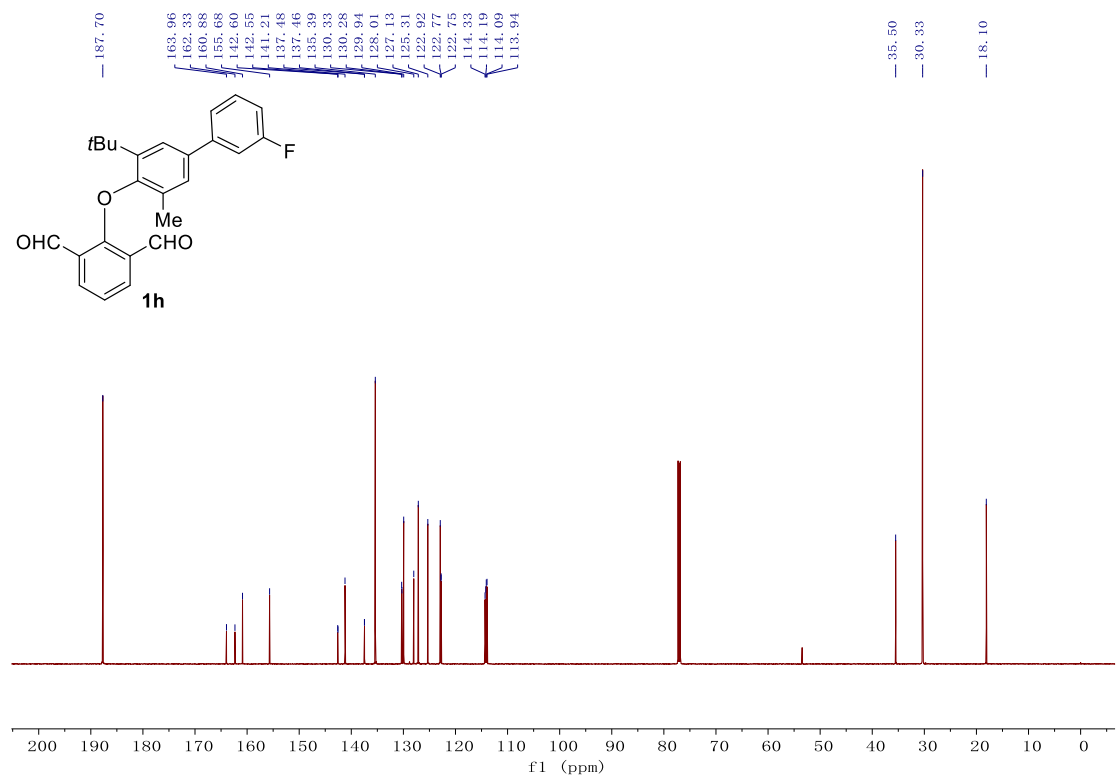

**<sup>13</sup>C NMR (150 MHz, CDCl<sub>3</sub>) spectrum of 1h.**

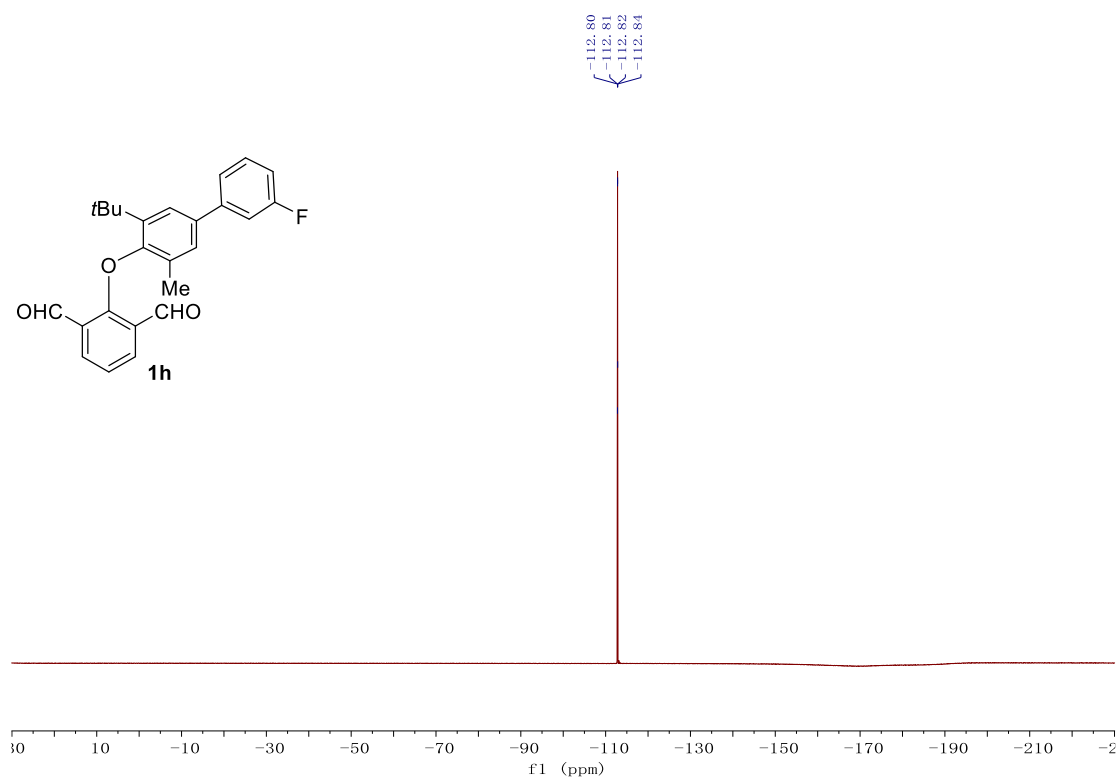

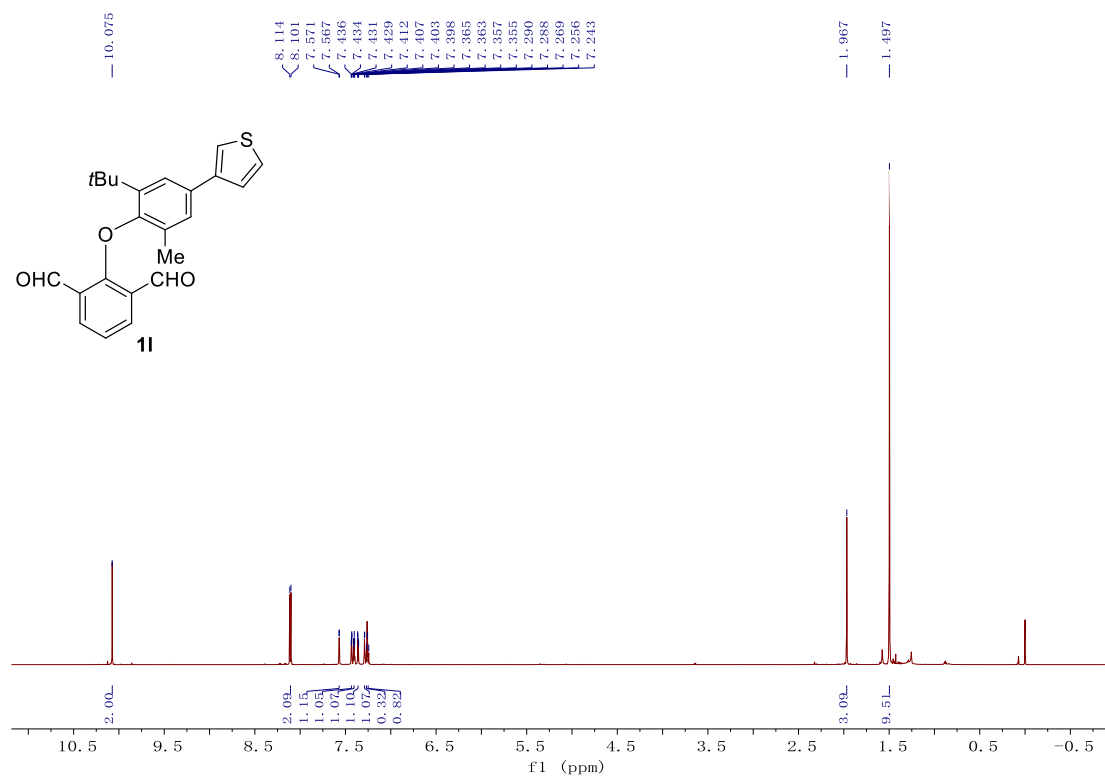

**<sup>1</sup>H NMR (600 MHz, CDCl<sub>3</sub>) spectrum of 11.**

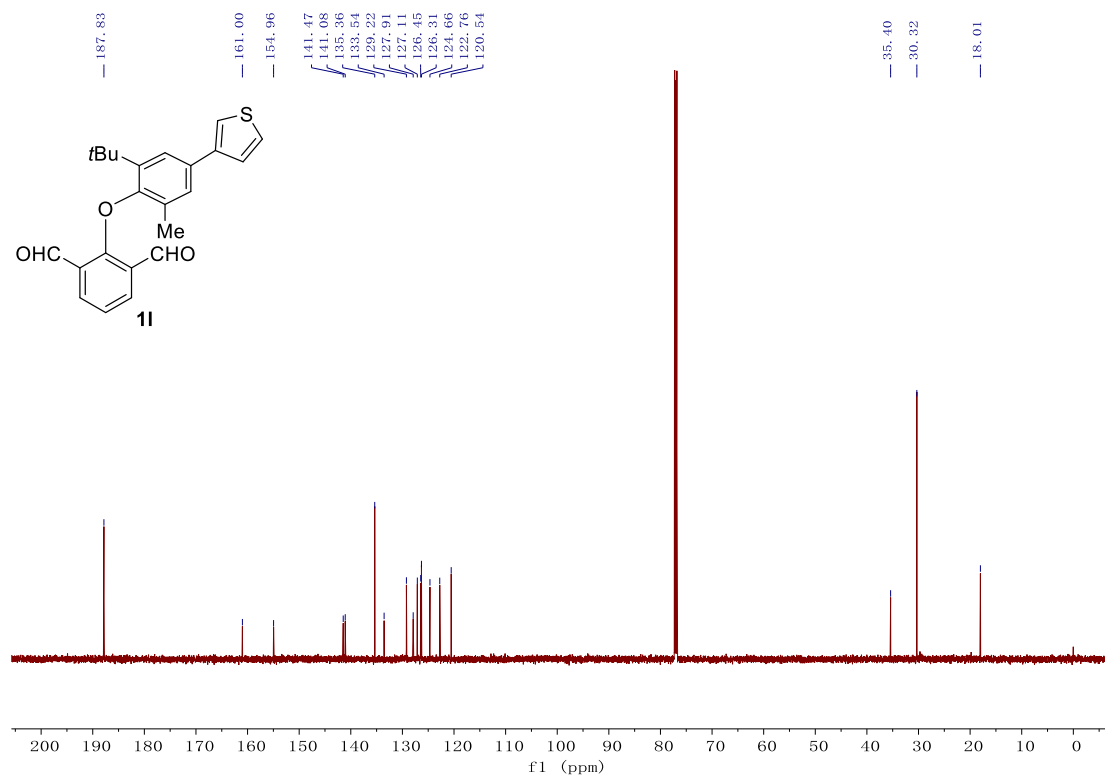

**<sup>13</sup>C NMR (150 MHz, CDCl<sub>3</sub>) spectrum of 11.**

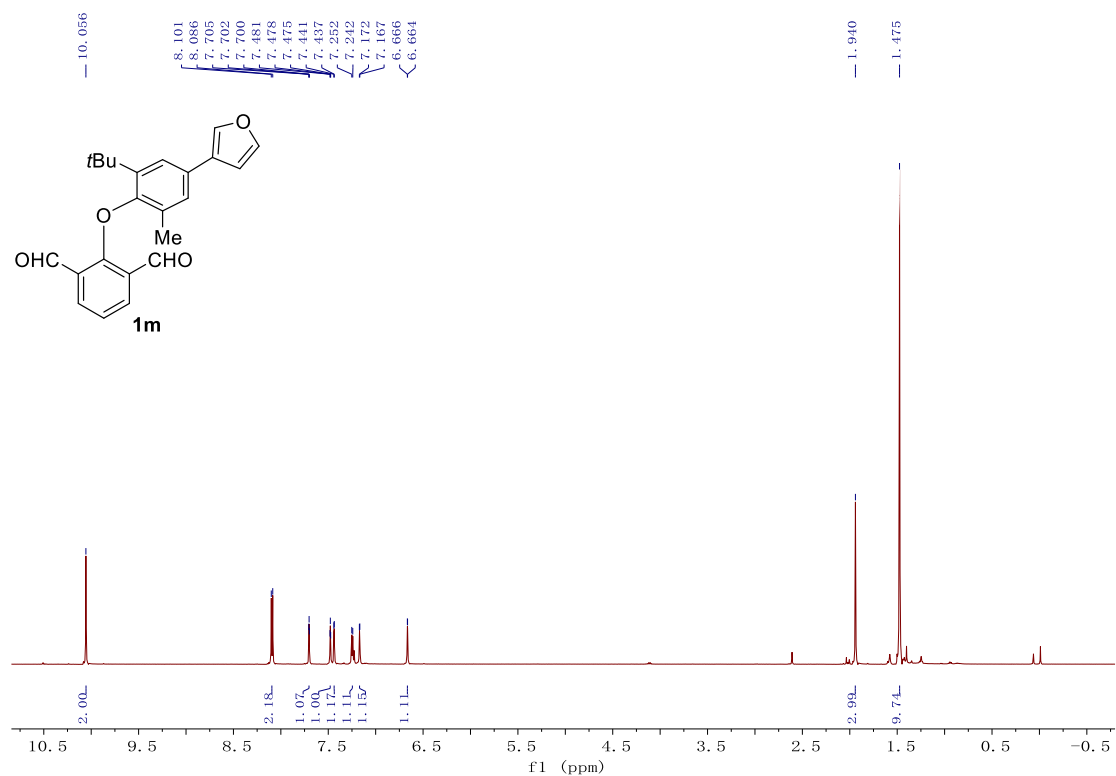

**<sup>1</sup>H NMR (500 MHz, CDCl<sub>3</sub>) spectrum of 1m.**

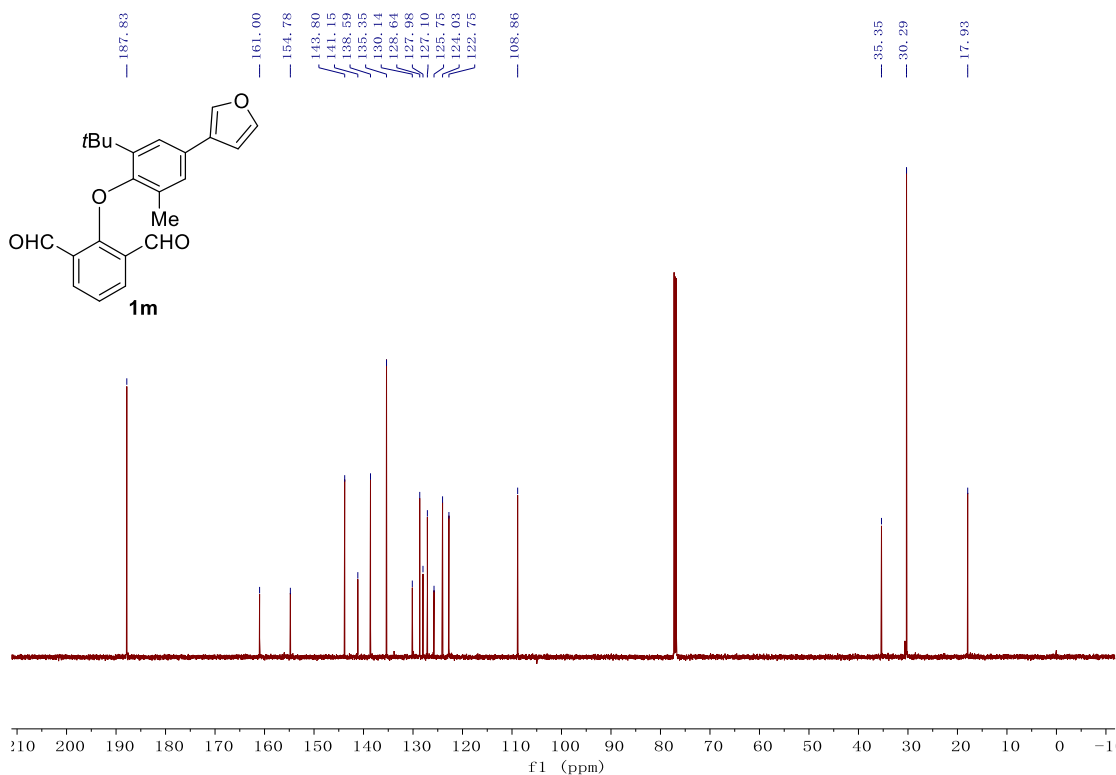

**<sup>13</sup>C NMR (150 MHz, CDCl<sub>3</sub>) spectrum of 1m.**

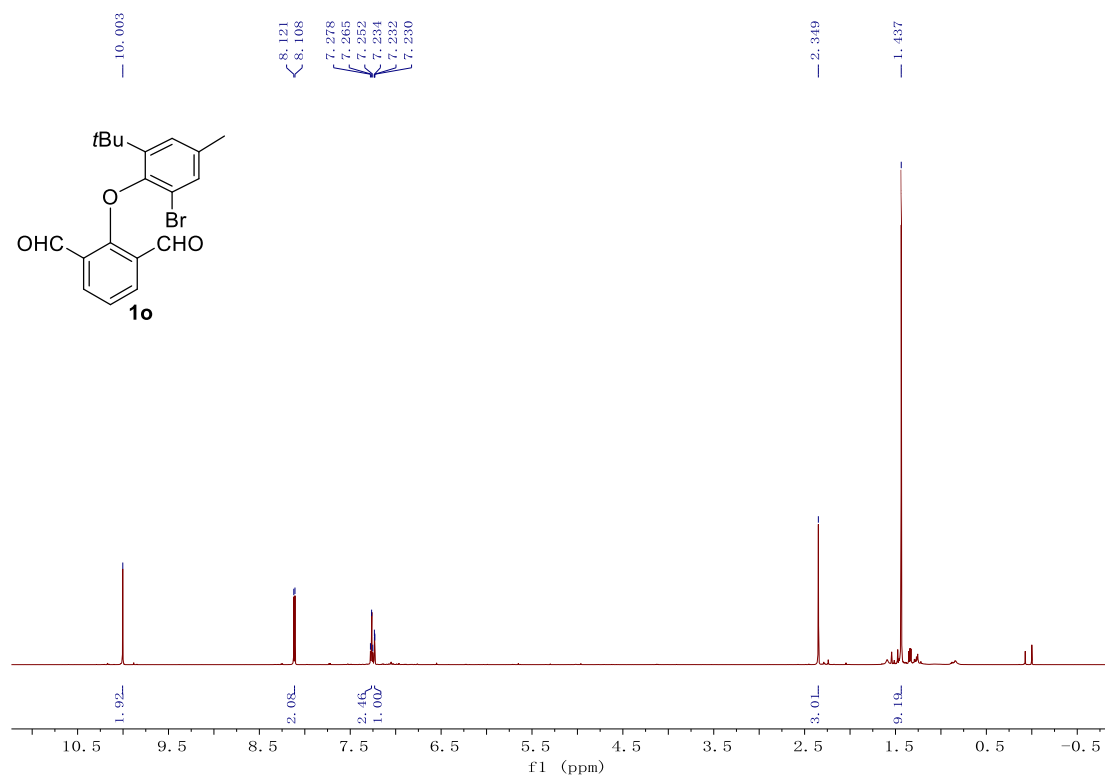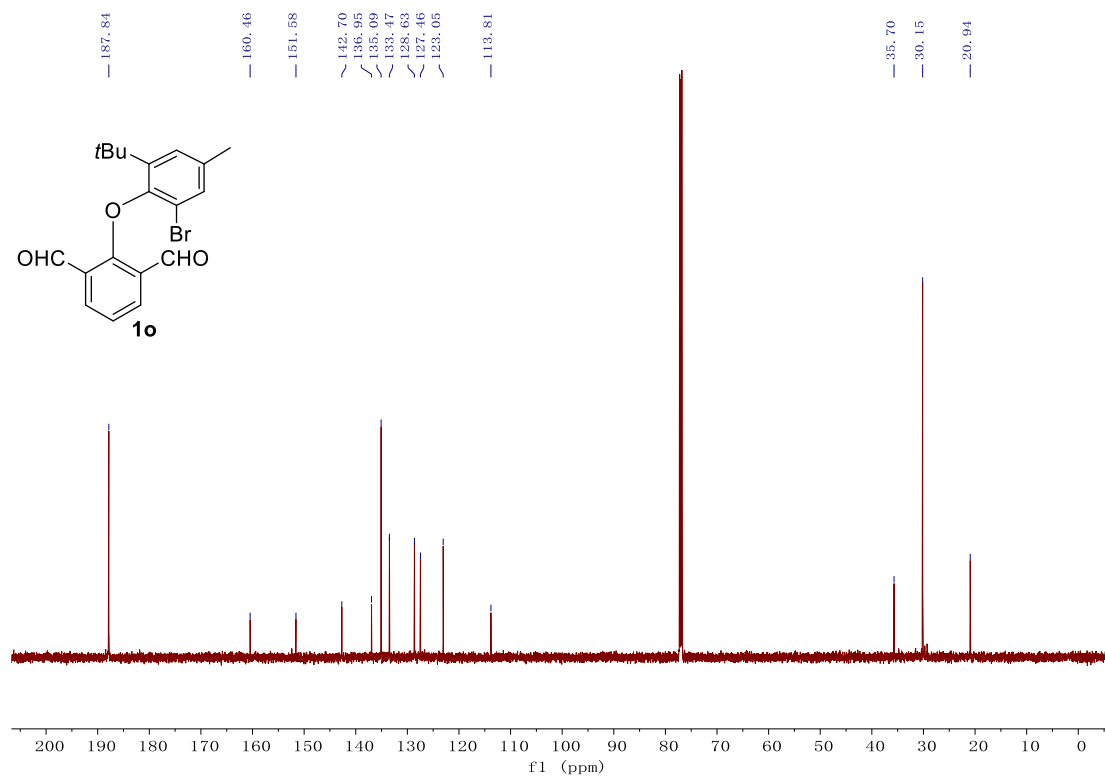

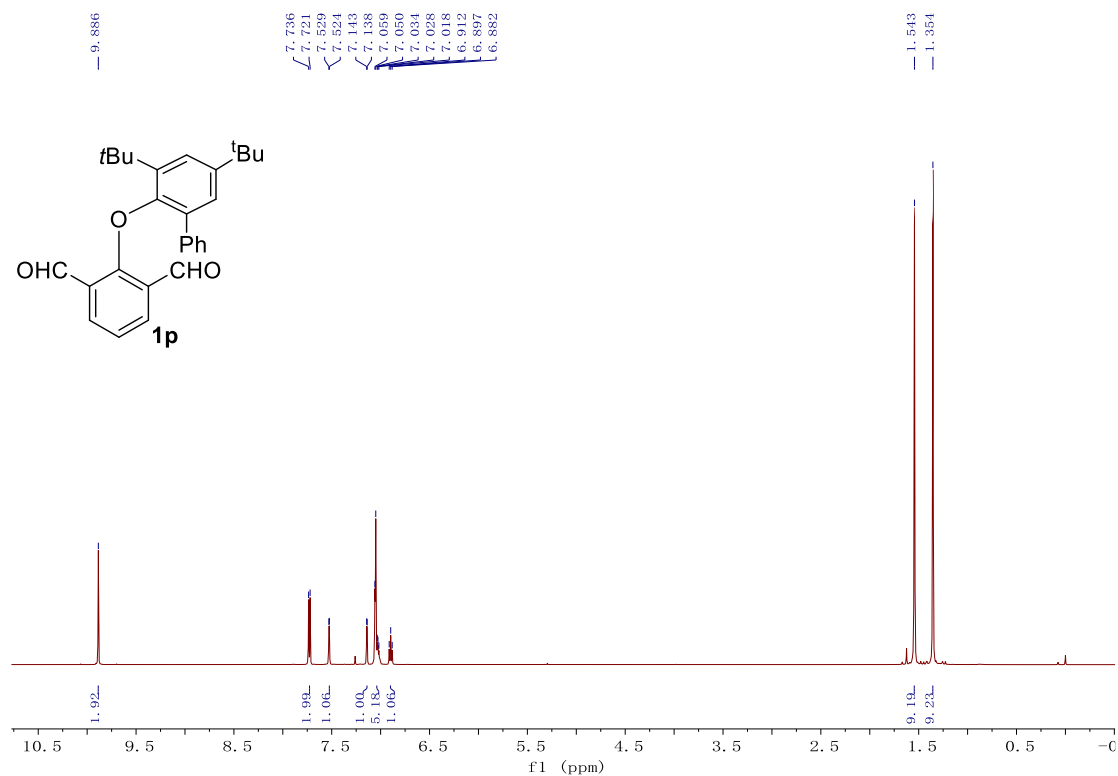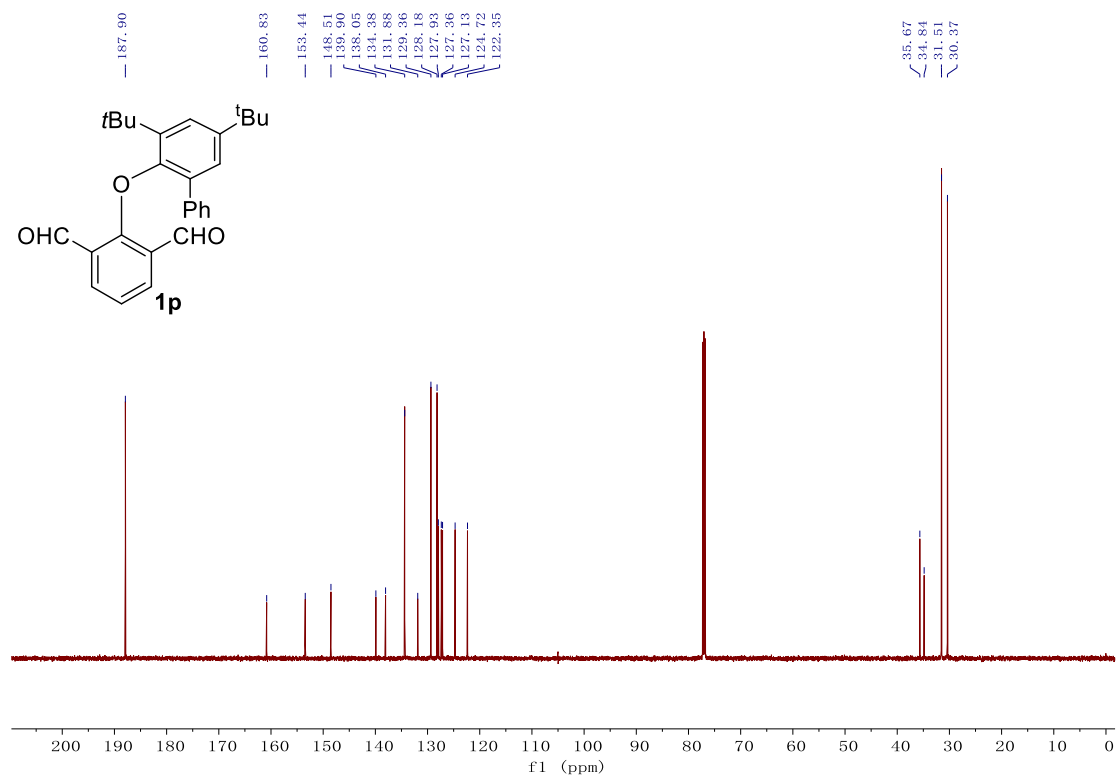

Supplement: d3sc06444a1.pdf [file d3sc06444a1.pdf]
